# Supplementary material
Source: Research Square preprint supplement (doi:10.21203/rs.3.rs-8335860/v1)
Supplement: Supplementary file 1 [file 41018f2f5e9678c3c2ac792d.xlsx]

## Sheet: Table S1
Table S1. Enrcihment obtained from A. thaliana genes inside orthogroups with lower scaled Tajima’s D in aquatic plants.
category	term	number_of_genes	number_of_genes_in_background	ncbiTaxonId	inputGenes	preferredNames	p_value	fdr	description
COMPARTMENTS	GOCC:0016234	4	19	3702	AT2G19800,AT4G26260,AT1G14520,AT5G56640	MIOX2,MIOX4,MIOX1,MIOX5	3.33e-08	5.36e-05	Inclusion body
COMPARTMENTS	GOCC:0106093	3	4	3702	AT3G52430,AT3G48080,AT3G48090	PAD4,EDS1B,EDS1	9.94e-08	7.99e-05	EDS1 disease-resistance complex
COMPARTMENTS	GOCC:0009326	2	4	3702	AT5G28310,AT2G45630	T8M17.80,F17K2.16	3.08e-05	0.011	Formate dehydrogenase complex
COMPARTMENTS	GOCC:0042729	2	3	3702	AT4G08920,AT1G04400	CRY1,CRY2	2.06e-05	0.011	DASH complex
COMPARTMENTS	GOCC:0045323	2	3	3702	AT3G52430,AT3G48090	PAD4,EDS1	2.06e-05	0.011	interleukin-1 receptor complex
COMPARTMENTS	GOCC:0031224	7	732	3702	AT5G39970,AT5G33280,AT5G62630,AT5G49890,AT3G52430,AT1G74790,AT3G48090	MYH19.17,CLC-G,HIPL2,CLC-C,PAD4,HIPL1,EDS1	8.46e-05	0.0198	Intrinsic component of membrane
COMPARTMENTS	GOCC:0016605	2	11	3702	AT4G08920,AT1G04400	CRY1,CRY2	0.00016	0.032	PML body
COMPARTMENTS	GOCC:0034707	2	12	3702	AT5G33280,AT5G49890	CLC-G,CLC-C	0.00019	0.0332	Chloride channel complex
COMPARTMENTS	GOCC:0031226	4	201	3702	AT5G62630,AT3G52430,AT1G74790,AT3G48090	HIPL2,PAD4,HIPL1,EDS1	0.00022	0.0357	Intrinsic component of plasma membrane
Process	GO:0006020	5	22	3702	AT2G19800,AT4G26260,AT1G14520,AT1G31190,AT5G56640	MIOX2,MIOX4,MIOX1,IMPL1,MIOX5	3.96e-10	1.54e-06	Inositol metabolic process
Process	GO:0019310	4	4	3702	AT2G19800,AT4G26260,AT1G14520,AT5G56640	MIOX2,MIOX4,MIOX1,MIOX5	2.67e-10	1.54e-06	Inositol catabolic process
Process	GO:0046174	5	34	3702	AT2G19800,AT4G26260,AT1G14520,AT1G31190,AT5G56640	MIOX2,MIOX4,MIOX1,IMPL1,MIOX5	2.79e-09	5.35e-06	Polyol catabolic process
Process	GO:0044282	8	261	3702	AT4G39950,AT2G19800,AT2G22330,AT3G16170,AT4G26260,AT1G14520,AT1G31190,AT5G56640	CYP79B2,MIOX2,CYP79B3,AAE13,MIOX4,MIOX1,IMPL1,MIOX5	4.43e-09	6.38e-06	Small molecule catabolic process
Process	GO:0019853	4	20	3702	AT2G19800,AT4G26260,AT1G14520,AT5G56640	MIOX2,MIOX4,MIOX1,MIOX5	3.99e-08	3.28e-05	L-ascorbic acid biosynthetic process
Process	GO:0010310	3	13	3702	AT4G08920,AT3G52430,AT3G48090	CRY1,PAD4,EDS1	1.58e-06	0.0007	Regulation of hydrogen peroxide metabolic process
Process	GO:2000377	4	56	3702	AT4G08920,AT1G04400,AT3G52430,AT3G48090	CRY1,CRY2,PAD4,EDS1	1.76e-06	0.00073	Regulation of reactive oxygen species metabolic process
Process	GO:0009862	3	20	3702	AT3G52430,AT3G48080,AT3G48090	PAD4,EDS1B,EDS1	4.95e-06	0.0017	Systemic acquired resistance, salicylic acid mediated signaling pathway
Process	GO:0044283	8	671	3702	AT4G39950,AT2G19800,AT2G22330,AT3G16170,AT4G26260,AT1G14520,AT1G31190,AT5G56640	CYP79B2,MIOX2,CYP79B3,AAE13,MIOX4,MIOX1,IMPL1,MIOX5	5.07e-06	0.0017	Small molecule biosynthetic process
Process	GO:0046394	7	486	3702	AT4G39950,AT2G19800,AT2G22330,AT3G16170,AT4G26260,AT1G14520,AT5G56640	CYP79B2,MIOX2,CYP79B3,AAE13,MIOX4,MIOX1,MIOX5	6.37e-06	0.0018	Carboxylic acid biosynthetic process
Process	GO:0010618	2	2	3702	AT3G52430,AT3G48090	PAD4,EDS1	1.24e-05	0.003	Aerenchyma formation
Process	GO:0045087	5	207	3702	AT4G39950,AT2G22330,AT3G52430,AT3G48080,AT3G48090	CYP79B2,CYP79B3,PAD4,EDS1B,EDS1	1.37e-05	0.0032	Innate immune response
Process	GO:0009625	3	33	3702	AT4G39950,AT2G22330,AT3G52430	CYP79B2,CYP79B3,PAD4	1.97e-05	0.004	Response to insect
Process	GO:0010617	2	3	3702	AT4G08920,AT1G04400	CRY1,CRY2	2.06e-05	0.0041	Circadian regulation of calcium ion oscillation
Process	GO:0012501	4	109	3702	AT4G08920,AT3G52430,AT3G48080,AT3G48090	CRY1,PAD4,EDS1B,EDS1	2.2e-05	0.0041	Programmed cell death
Process	GO:0034765	3	43	3702	AT5G33280,AT4G08920,AT5G49890	CLC-G,CRY1,CLC-C	4.14e-05	0.0066	Regulation of ion transmembrane transport
Process	GO:0043153	2	5	3702	AT4G08920,AT1G04400	CRY1,CRY2	4.31e-05	0.0066	Entrainment of circadian clock by photoperiod
Process	GO:0072387	2	6	3702	AT4G08920,AT1G04400	CRY1,CRY2	5.74e-05	0.0085	Flavin adenine dinucleotide metabolic process
Process	GO:1902347	2	7	3702	AT4G08920,AT1G04400	CRY1,CRY2	7.38e-05	0.0104	Response to strigolactone
Process	GO:0006569	2	8	3702	AT4G39950,AT2G22330	CYP79B2,CYP79B3	9.21e-05	0.0123	Tryptophan catabolic process
Process	GO:0010244	2	8	3702	AT4G08920,AT1G04400	CRY1,CRY2	9.21e-05	0.0123	Response to low fluence blue light stimulus by blue low-fluence system
Process	GO:0014070	5	313	3702	AT4G08920,AT1G04400,AT3G52430,AT3G48080,AT3G48090	CRY1,CRY2,PAD4,EDS1B,EDS1	9.46e-05	0.0123	Response to organic cyclic compound
Process	GO:0060866	2	8	3702	AT3G52430,AT3G48090	PAD4,EDS1	9.21e-05	0.0123	Leaf abscission
Process	GO:0016051	5	334	3702	AT2G19800,AT4G26260,AT1G14520,AT1G31190,AT5G56640	MIOX2,MIOX4,MIOX1,IMPL1,MIOX5	0.00013	0.0147	Carbohydrate biosynthetic process
Process	GO:0044281	10	1705	3702	AT4G39950,AT2G19800,AT4G08920,AT2G22330,AT3G16170,AT4G26260,AT1G14520,AT1G31190,AT1G04400,AT5G56640	CYP79B2,MIOX2,CRY1,CYP79B3,AAE13,MIOX4,MIOX1,IMPL1,CRY2,MIOX5	0.00013	0.0148	Small molecule metabolic process
Process	GO:0009684	2	11	3702	AT4G39950,AT2G22330	CYP79B2,CYP79B3	0.00016	0.0167	Indoleacetic acid biosynthetic process
Process	GO:0010120	2	11	3702	AT4G39950,AT2G22330	CYP79B2,CYP79B3	0.00016	0.0167	Camalexin biosynthetic process
Process	GO:0032922	2	11	3702	AT4G08920,AT1G04400	CRY1,CRY2	0.00016	0.0167	Circadian regulation of gene expression
Process	GO:0000304	2	13	3702	AT4G08920,AT3G48090	CRY1,EDS1	0.00021	0.0181	Response to singlet oxygen
Process	GO:0009626	3	75	3702	AT3G52430,AT3G48080,AT3G48090	PAD4,EDS1B,EDS1	0.0002	0.0181	Plant-type hypersensitive response
Process	GO:0052544	2	16	3702	AT4G39950,AT2G22330	CYP79B2,CYP79B3	0.00031	0.0249	Defense response by callose deposition in cell wall
Process	GO:1901575	9	1639	3702	AT4G39950,AT2G19800,AT2G22330,AT3G16170,AT4G26260,AT1G14520,AT1G31190,AT5G56640,AT3G52430	CYP79B2,MIOX2,CYP79B3,AAE13,MIOX4,MIOX1,IMPL1,MIOX5,PAD4	0.00049	0.0344	Organic substance catabolic process
Process	GO:0050829	2	22	3702	AT3G52430,AT3G48090	PAD4,EDS1	0.00056	0.0383	Defense response to Gram-negative bacterium
Process	GO:0006875	3	113	3702	AT4G08920,AT1G04400,AT3G08040	CRY1,CRY2,DTX43	0.00064	0.0411	Cellular metal ion homeostasis
Process	GO:0009638	2	23	3702	AT4G08920,AT1G04400	CRY1,CRY2	0.00061	0.0411	Phototropism
Process	GO:0010112	2	23	3702	AT4G08920,AT2G22330	CRY1,CYP79B3	0.00061	0.0411	Regulation of systemic acquired resistance
Process	GO:1901371	2	23	3702	AT4G08920,AT1G04400	CRY1,CRY2	0.00061	0.0411	Regulation of leaf morphogenesis
Process	GO:1900426	2	27	3702	AT4G08920,AT3G52430	CRY1,PAD4	0.00082	0.0495	Positive regulation of defense response to bacterium
Component	GO:0106093	3	4	3702	AT3G52430,AT3G48080,AT3G48090	PAD4,EDS1B,EDS1	9.94e-08	9.99e-05	EDS1 disease-resistance complex
Component	GO:0016605	2	5	3702	AT4G08920,AT1G04400	CRY1,CRY2	4.31e-05	0.0217	PML body
Component	GO:0034707	2	8	3702	AT5G33280,AT5G49890	CLC-G,CLC-C	9.21e-05	0.0309	Chloride channel complex
Function	GO:0050113	4	4	3702	AT2G19800,AT4G26260,AT1G14520,AT5G56640	MIOX2,MIOX4,MIOX1,MIOX5	2.67e-10	8.54e-07	Inositol oxygenase activity
Function	GO:0016618	3	5	3702	AT5G28310,AT2G45630,AT1G12550	T8M17.80,F17K2.16,HPR3	1.59e-07	0.00025	Hydroxypyruvate reductase activity
Function	GO:0016491	13	1604	3702	AT5G28310,AT4G39950,AT2G19800,AT2G22330,AT2G45630,AT4G26260,AT1G14520,AT5G18400,AT5G62630,AT5G56640,AT5G05260,AT1G12550,AT1G74790	T8M17.80,CYP79B2,MIOX2,CYP79B3,F17K2.16,MIOX4,MIOX1,F20L16.120,HIPL2,MIOX5,CYP79A2,HPR3,HIPL1	2.58e-07	0.00027	Oxidoreductase activity
Function	GO:0030267	3	7	3702	AT5G28310,AT2G45630,AT1G12550	T8M17.80,F17K2.16,HPR3	3.4e-07	0.00027	Glyoxylate reductase (NADP+) activity
Function	GO:0004497	7	332	3702	AT4G39950,AT2G19800,AT2G22330,AT4G26260,AT1G14520,AT5G56640,AT5G05260	CYP79B2,MIOX2,CYP79B3,MIOX4,MIOX1,MIOX5,CYP79A2	5.34e-07	0.00028	Monooxygenase activity
Function	GO:0005506	7	362	3702	AT4G39950,AT2G19800,AT2G22330,AT4G26260,AT1G14520,AT5G56640,AT5G05260	CYP79B2,MIOX2,CYP79B3,MIOX4,MIOX1,MIOX5,CYP79A2	9.42e-07	0.00038	Iron ion binding
Function	GO:0015137	2	2	3702	AT3G08040,AT1G51340	DTX43,DTX42	1.24e-05	0.0044	Citrate transmembrane transporter activity
Function	GO:0003904	2	5	3702	AT4G08920,AT1G04400	CRY1,CRY2	4.31e-05	0.0125	Deoxyribodipyrimidine photo-lyase activity
Function	GO:0009882	2	5	3702	AT4G08920,AT1G04400	CRY1,CRY2	4.31e-05	0.0125	Blue light photoreceptor activity
Function	GO:0005247	2	9	3702	AT5G33280,AT5G49890	CLC-G,CLC-C	0.00011	0.0257	Voltage-gated chloride channel activity
Function	GO:0042910	3	74	3702	AT3G59140,AT3G08040,AT1G51340	ABCC10,DTX43,DTX42	0.00019	0.0386	Xenobiotic transmembrane transporter activity
Function	GO:0008509	4	208	3702	AT5G33280,AT5G49890,AT3G08040,AT1G51340	CLC-G,CLC-C,DTX43,DTX42	0.00025	0.0448	Anion transmembrane transporter activity
Function	GO:0051287	3	82	3702	AT5G28310,AT2G45630,AT1G12550	T8M17.80,F17K2.16,HPR3	0.00026	0.0448	NAD binding
Keyword	KW-0060	4	14	3702	AT2G19800,AT4G26260,AT1G14520,AT5G56640	MIOX2,MIOX4,MIOX1,MIOX5	1.16e-08	5.39e-06	Ascorbate biosynthesis
Keyword	KW-0963	14	1901	3702	AT2G19800,AT4G08920,AT4G28190,AT3G16170,AT4G26260,AT1G14520,AT5G18400,AT2G20825,AT1G04400,AT5G56640,AT5G60980,AT3G52430,AT3G48080,AT3G48090	MIOX2,CRY1,ULT1,AAE13,MIOX4,MIOX1,F20L16.120,ULT2,CRY2,MIOX5,NTF2,PAD4,EDS1B,EDS1	2.48e-07	5.79e-05	Cytoplasm
Keyword	KW-0560	11	1174	3702	AT4G39950,AT2G19800,AT2G22330,AT2G45630,AT4G26260,AT1G14520,AT5G62630,AT5G56640,AT5G05260,AT1G12550,AT1G74790	CYP79B2,MIOX2,CYP79B3,F17K2.16,MIOX4,MIOX1,HIPL2,MIOX5,CYP79A2,HPR3,HIPL1	6.63e-07	0.0001	Oxidoreductase
Keyword	KW-0408	8	772	3702	AT4G39950,AT2G19800,AT2G22330,AT4G26260,AT1G14520,AT5G18400,AT5G56640,AT5G05260	CYP79B2,MIOX2,CYP79B3,MIOX4,MIOX1,F20L16.120,MIOX5,CYP79A2	1.39e-05	0.0014	Iron
Keyword	KW-0634	2	2	3702	AT5G62630,AT1G74790	HIPL2,HIPL1	1.24e-05	0.0014	PQQ
Keyword	KW-0407	4	118	3702	AT5G33280,AT5G49890,AT3G08040,AT1G51340	CLC-G,CLC-C,DTX43,DTX42	2.98e-05	0.0023	Ion channel
Keyword	KW-0869	2	8	3702	AT5G33280,AT5G49890	CLC-G,CLC-C	9.21e-05	0.0061	Chloride channel
Keyword	KW-0600	2	16	3702	AT4G08920,AT1G04400	CRY1,CRY2	0.00031	0.0161	Photoreceptor protein
Keyword	KW-0851	2	19	3702	AT5G33280,AT5G49890	CLC-G,CLC-C	0.00043	0.0198	Voltage-gated channel
Keyword	KW-0479	13	3298	3702	AT4G39950,AT2G19800,AT4G08920,AT2G22330,AT4G28190,AT4G26260,AT1G14520,AT5G18400,AT1G31190,AT1G04400,AT5G56640,AT5G05260,AT2G01650	CYP79B2,MIOX2,CRY1,CYP79B3,ULT1,MIOX4,MIOX1,F20L16.120,IMPL1,CRY2,MIOX5,CYP79A2,PUX2	0.00056	0.0217	Metal-binding
KEGG	ath00562	5	77	3702	AT2G19800,AT4G26260,AT1G14520,AT1G31190,AT5G56640	MIOX2,MIOX4,MIOX1,IMPL1,MIOX5	1.26e-07	1.7e-05	Inositol phosphate metabolism
KEGG	ath00053	4	54	3702	AT2G19800,AT4G26260,AT1G14520,AT5G56640	MIOX2,MIOX4,MIOX1,MIOX5	1.54e-06	0.0001	Ascorbate and aldarate metabolism
KEGG	ath00966	3	25	3702	AT4G39950,AT2G22330,AT5G05260	CYP79B2,CYP79B3,CYP79A2	9.1e-06	0.00041	Glucosinolate biosynthesis
KEGG	ath01210	3	73	3702	AT4G39950,AT2G22330,AT5G05260	CYP79B2,CYP79B3,CYP79A2	0.00019	0.0063	2-Oxocarboxylic acid metabolism
KEGG	ath01100	10	2285	3702	AT4G39950,AT2G19800,AT2G22330,AT3G16170,AT4G26260,AT1G14520,AT1G31190,AT5G56640,AT5G05260,AT1G12550	CYP79B2,MIOX2,CYP79B3,AAE13,MIOX4,MIOX1,IMPL1,MIOX5,CYP79A2,HPR3	0.0013	0.0358	Metabolic pathways
KEGG	ath04712	2	39	3702	AT4G08920,AT1G04400	CRY1,CRY2	0.0016	0.0367	Circadian rhythm - plant
InterPro	IPR009291	8	10	3702	AT2G44230,AT2G44260,AT1G04090,AT5G18490,AT5G43950,AT3G04350,AT3G01880,AT3G01870	F4I1.4,F4I1.7,F20D22.17,T28N17.2,MRH10.5,T6K12.3,F28J7.21,F28J7.20	4.11e-19	2.6e-15	Vacuolar protein sorting-associated protein 62
InterPro	IPR007828	4	4	3702	AT2G19800,AT4G26260,AT1G14520,AT5G56640	MIOX2,MIOX4,MIOX1,MIOX5	2.67e-10	8.46e-07	Inositol oxygenase
InterPro	IPR011041	3	3	3702	AT5G39970,AT5G62630,AT1G74790	MYH19.17,HIPL2,HIPL1	5.68e-08	0.00012	Soluble quinoprotein glucose/sorbosone dehydrogenase
InterPro	IPR012938	3	3	3702	AT5G39970,AT5G62630,AT1G74790	MYH19.17,HIPL2,HIPL1	5.68e-08	0.00012	Glucose/Sorbosone dehydrogenase
InterPro	IPR041266	3	4	3702	AT3G52430,AT3G48080,AT3G48090	PAD4,EDS1B,EDS1	9.94e-08	0.00013	EDS1, EP domain
InterPro	IPR006140	3	11	3702	AT5G28310,AT2G45630,AT1G12550	T8M17.80,F17K2.16,HPR3	1.03e-06	0.0011	D-isomer specific 2-hydroxyacid dehydrogenase, NAD-binding domain
InterPro	IPR000770	2	2	3702	AT4G28190,AT2G20825	ULT1,ULT2	1.24e-05	0.0112	SAND domain
InterPro	IPR014134	2	2	3702	AT4G08920,AT1G04400	CRY1,CRY2	1.24e-05	0.0112	Cryptochrome, plant
InterPro	IPR018394	2	2	3702	AT4G08920,AT1G04400	CRY1,CRY2	1.24e-05	0.0112	Cryptochrome/DNA photolyase class 1, conserved site, C-terminal
InterPro	IPR020533	2	2	3702	AT4G28190,AT2G20825	ULT1,ULT2	1.24e-05	0.0112	Developmental regulator, ULTRAPETALA
InterPro	IPR044214	2	2	3702	AT3G48080,AT3G48090	EDS1B,EDS1	1.24e-05	0.0112	EDS1-like
InterPro	IPR011042	3	34	3702	AT5G39970,AT5G62630,AT1G74790	MYH19.17,HIPL2,HIPL1	2.14e-05	0.0113	Six-bladed beta-propeller, TolB-like
InterPro	IPR005101	2	4	3702	AT4G08920,AT1G04400	CRY1,CRY2	3.08e-05	0.015	Cryptochrome/DNA photolyase, FAD-binding domain
InterPro	IPR002081	2	5	3702	AT4G08920,AT1G04400	CRY1,CRY2	4.31e-05	0.0187	Cryptochrome/DNA photolyase class 1
InterPro	IPR002251	2	5	3702	AT5G33280,AT5G49890	CLC-G,CLC-C	4.31e-05	0.0187	Chloride channel ClC-plant
InterPro	IPR002921	3	43	3702	AT3G52430,AT3G48080,AT3G48090	PAD4,EDS1B,EDS1	4.14e-05	0.0187	Fungal lipase-like domain
InterPro	IPR036134	2	6	3702	AT4G08920,AT1G04400	CRY1,CRY2	5.74e-05	0.0214	Cryptochrome/DNA photolyase, FAD-binding domain-like superfamily
InterPro	IPR044644	2	6	3702	AT3G08040,AT1G51340	DTX43,DTX42	5.74e-05	0.0214	Multi antimicrobial extrusion protein DinF-like
InterPro	IPR001807	2	7	3702	AT5G33280,AT5G49890	CLC-G,CLC-C	7.38e-05	0.0246	Chloride channel, voltage gated
InterPro	IPR006050	2	7	3702	AT4G08920,AT1G04400	CRY1,CRY2	7.38e-05	0.0246	DNA photolyase, N-terminal
InterPro	IPR014743	2	7	3702	AT5G33280,AT5G49890	CLC-G,CLC-C	7.38e-05	0.0246	Chloride channel, core
InterPro	IPR036155	2	7	3702	AT4G08920,AT1G04400	CRY1,CRY2	7.38e-05	0.0246	Cryptochrome/photolyase, N-terminal domain superfamily
InterPro	IPR006139	2	9	3702	AT2G45630,AT1G12550	F17K2.16,HPR3	0.00011	0.031	D-isomer specific 2-hydroxyacid dehydrogenase, catalytic domain
InterPro	IPR039539	2	10	3702	AT3G25150,AT5G60980	F4J8X6_ARATH,NTF2	0.00013	0.0356	Ras GTPase-activating protein-binding protein
Pfam	PF06101	8	10	3702	AT2G44230,AT2G44260,AT1G04090,AT5G18490,AT5G43950,AT3G04350,AT3G01880,AT3G01870	F4I1.4,F4I1.7,F20D22.17,T28N17.2,MRH10.5,T6K12.3,F28J7.21,F28J7.20	4.11e-19	8.5e-16	Vacuolar protein sorting-associated protein 62
Pfam	PF05153	4	4	3702	AT2G19800,AT4G26260,AT1G14520,AT5G56640	MIOX2,MIOX4,MIOX1,MIOX5	2.67e-10	2.77e-07	Myo-inositol oxygenase
Pfam	PF07995	3	3	3702	AT5G39970,AT5G62630,AT1G74790	MYH19.17,HIPL2,HIPL1	5.68e-08	3.92e-05	Glucose / Sorbosone dehydrogenase
Pfam	PF02826	3	11	3702	AT5G28310,AT2G45630,AT1G12550	T8M17.80,F17K2.16,HPR3	1.03e-06	0.00053	D-isomer specific 2-hydroxyacid dehydrogenase, NAD binding domain
Pfam	PF03441	2	4	3702	AT4G08920,AT1G04400	CRY1,CRY2	3.08e-05	0.0128	FAD binding domain of DNA photolyase
Pfam	PF01764	3	43	3702	AT3G52430,AT3G48080,AT3G48090	PAD4,EDS1B,EDS1	4.14e-05	0.0143	Lipase (class 3)
Pfam	PF00654	2	7	3702	AT5G33280,AT5G49890	CLC-G,CLC-C	7.38e-05	0.0218	Voltage gated chloride channel
Pfam	PF00875	2	7	3702	AT4G08920,AT1G04400	CRY1,CRY2	7.38e-05	0.0218	DNA photolyase
Pfam	PF14667	2	7	3702	AT3G08040,AT1G51340	DTX43,DTX42	7.38e-05	0.0218	Polysaccharide biosynthesis C-terminal domain
Pfam	PF02136	2	13	3702	AT3G25150,AT5G60980	F4J8X6_ARATH,NTF2	0.00021	0.0443	Nuclear transport factor 2 (NTF2) domain
PMID	PMID:34226565	4	5	3702	AT2G19800,AT4G26260,AT1G14520,AT5G56640	MIOX2,MIOX4,MIOX1,MIOX5	4.81e-10	2.63e-05	(2021) Four chromosome scale genomes and a pan-genome annotation to accelerate pecan tree breeding.
PMID	PMID:28243246	4	6	3702	AT2G19800,AT4G26260,AT1G14520,AT5G56640	MIOX2,MIOX4,MIOX1,MIOX5	8e-10	2.63e-05	(2017) Community Structure, Species Variation, and Potential Functions of Rhizosphere-Associated Bacteria of Different Winter Wheat (Triticum aestivum) Cultivars.
PMID	PMID:25157261	4	5	3702	AT2G19800,AT4G26260,AT1G14520,AT5G56640	MIOX2,MIOX4,MIOX1,MIOX5	4.81e-10	2.63e-05	(2014) New biotechnology enhances the application of cisgenesis in plant breeding.
PMID	PMID:24122057	4	5	3702	AT2G19800,AT4G26260,AT1G14520,AT5G56640	MIOX2,MIOX4,MIOX1,MIOX5	4.81e-10	2.63e-05	(2013) RNA-guided genome editing for target gene mutations in wheat.
PMID	PMID:22639659	4	6	3702	AT2G19800,AT4G26260,AT1G14520,AT5G56640	MIOX2,MIOX4,MIOX1,MIOX5	8e-10	2.63e-05	(2012) myo-Inositol Oxygenase is Required for Responses to Low Energy Conditions in Arabidopsis thaliana.
PMID	PMID:15660207	4	4	3702	AT2G19800,AT4G26260,AT1G14520,AT5G56640	MIOX2,MIOX4,MIOX1,MIOX5	2.67e-10	2.63e-05	(2005) The inositol oxygenase gene family of Arabidopsis is involved in the biosynthesis of nucleotide sugar precursors for cell-wall matrix polysaccharides.
PMID	PMID:32252624	4	10	3702	AT2G19800,AT4G26260,AT1G14520,AT5G56640	MIOX2,MIOX4,MIOX1,MIOX5	3.8e-09	5.34e-05	(2020) Genome-wide analysis of Myo-inositol oxygenase gene family in tomato reveals their involvement in ascorbic acid accumulation.
PMID	PMID:22848518	4	10	3702	AT2G19800,AT4G26260,AT1G14520,AT5G56640	MIOX2,MIOX4,MIOX1,MIOX5	3.8e-09	5.34e-05	(2012) Cell wall ingrowths in nematode induced syncytia require UGD2 and UGD3.
PMID	PMID:26091094	4	12	3702	AT2G19800,AT4G26260,AT1G14520,AT5G56640	MIOX2,MIOX4,MIOX1,MIOX5	6.89e-09	7.53e-05	(2015) Ectopic Expression of a Glycine soja myo-Inositol Oxygenase Gene (GsMIOX1a) in Arabidopsis Enhances Tolerance to Alkaline Stress.
PMID	PMID:32995104	4	13	3702	AT2G19800,AT4G26260,AT1G14520,AT5G56640	MIOX2,MIOX4,MIOX1,MIOX5	9e-09	8.85e-05	(2020) Phenotypic characterization of Arabidopsis thaliana lines overexpressing AVP1 and MIOX4 in response to abiotic stresses.
PMID	PMID:22920915	4	13	3702	AT2G19800,AT4G26260,AT1G14520,AT5G56640	MIOX2,MIOX4,MIOX1,MIOX5	9e-09	8.85e-05	(2012) Genetic diversity within the genus Francisella as revealed by comparative analyses of the genomes of two North American isolates from environmental sources.
PMID	PMID:27044251	4	16	3702	AT2G19800,AT4G26260,AT1G14520,AT5G56640	MIOX2,MIOX4,MIOX1,MIOX5	1.83e-08	0.00015	(2016) Exploring tomato Solanum pennellii introgression lines for residual biomass and enzymatic digestibility traits.
PMID	PMID:22072959	4	17	3702	AT1G04400,AT3G52430,AT3G48080,AT3G48090	CRY2,PAD4,EDS1B,EDS1	2.25e-08	0.00017	(2011) SAG101 forms a ternary complex with EDS1 and PAD4 and is required for resistance signaling against turnip crinkle virus.
PMID	PMID:33301486	5	55	3702	AT2G19800,AT2G22330,AT4G26260,AT1G14520,AT5G56640	MIOX2,CYP79B3,MIOX4,MIOX1,MIOX5	2.59e-08	0.00018	(2020) Transcriptomic analysis reveals responses to Cycloastragenol in Arabidopsis thaliana.
PMID	PMID:34828270	4	19	3702	AT4G39950,AT4G08920,AT2G22330,AT1G04400	CYP79B2,CRY1,CYP79B3,CRY2	3.33e-08	0.00022	(2021) The BrGI Circadian Clock Gene Is Involved in the Regulation of Glucosinolates in Chinese Cabbage.
PMID	PMID:24117492	4	20	3702	AT2G19800,AT4G26260,AT1G14520,AT5G56640	MIOX2,MIOX4,MIOX1,MIOX5	3.99e-08	0.00025	(2014) Myo-inositol oxygenase is important for the removal of excess myo-inositol from syncytia induced by Heterodera schachtii in Arabidopsis roots.
PMID	PMID:36978985	5	62	3702	AT4G39950,AT4G08920,AT2G22330,AT1G04400,AT5G05260	CYP79B2,CRY1,CYP79B3,CRY2,CYP79A2	4.54e-08	0.00026	(2023) RNA-Seq Analysis Demystify the Pathways of UV-A Supplementation in Different Photoperiods Integrated with Blue and Red Light on Morphology and Phytochemical Profile of Kale.
PMID	PMID:24678316	4	22	3702	AT2G19800,AT4G26260,AT1G14520,AT5G56640	MIOX2,MIOX4,MIOX1,MIOX5	5.6e-08	0.00031	(2014) The plant cell wall in the feeding sites of cyst nematodes.
PMID	PMID:21394467	4	25	3702	AT2G19800,AT4G26260,AT1G14520,AT5G56640	MIOX2,MIOX4,MIOX1,MIOX5	8.87e-08	0.00046	(2011) Down-regulation of the myo-inositol oxygenase gene family has no effect on cell wall composition in Arabidopsis.
PMID	PMID:17257166	3	4	3702	AT4G39950,AT2G22330,AT3G52430	CYP79B2,CYP79B3,PAD4	9.94e-08	0.00049	(2007) Myzus persicae (green peach aphid) feeding on Arabidopsis induces the formation of a deterrent indole glucosinolate.
PMID	PMID:26222686	4	27	3702	AT2G19800,AT4G26260,AT1G14520,AT5G56640	MIOX2,MIOX4,MIOX1,MIOX5	1.17e-07	0.00055	(2015) Metabolic Plasticity and Inter-Compartmental Interactions in Rice Metabolism: An Analysis from Reaction Deletion Study.
PMID	PMID:34510462	4	28	3702	AT4G39950,AT2G22330,AT3G52430,AT3G48090	CYP79B2,CYP79B3,PAD4,EDS1	1.34e-07	0.0006	(2021) Insect eggs trigger systemic acquired resistance against a fungal and an oomycete pathogen.
PMID	PMID:37047402	4	30	3702	AT2G19800,AT4G26260,AT1G14520,AT5G56640	MIOX2,MIOX4,MIOX1,MIOX5	1.72e-07	0.00065	(2023) Transcriptomic Analysis of Heat Stress Response in Brassica rapa L. ssp. pekinensis with Improved Thermotolerance through Exogenous Glycine Betaine.
PMID	PMID:34868181	4	29	3702	AT2G19800,AT4G26260,AT1G14520,AT5G56640	MIOX2,MIOX4,MIOX1,MIOX5	1.52e-07	0.00065	(2021) The Transcriptome and Metabolome Reveal Stress Responses in Sulfur-Fumigated Cucumber (Cucumis sativus L.).
PMID	PMID:26124768	4	29	3702	AT2G19800,AT4G26260,AT1G14520,AT5G56640	MIOX2,MIOX4,MIOX1,MIOX5	1.52e-07	0.00065	(2015) An improved fruit transcriptome and the identification of the candidate genes involved in fruit abscission induced by carbohydrate stress in litchi.
PMID	PMID:25253284	4	29	3702	AT2G19800,AT4G26260,AT1G14520,AT5G56640	MIOX2,MIOX4,MIOX1,MIOX5	1.52e-07	0.00065	(2014) Genome-wide metabolic re-annotation of Ashbya gossypii: new insights into its metabolism through a comparative analysis with Saccharomyces cerevisiae and Kluyveromyces lactis.
PMID	PMID:35095972	4	31	3702	AT4G39950,AT4G08920,AT2G22330,AT1G04400	CYP79B2,CRY1,CYP79B3,CRY2	1.94e-07	0.00071	(2021) Shade Avoidance 3 Mediates Crosstalk Between Shade and Nitrogen in Arabidopsis Leaf Development.
PMID	PMID:31354748	4	32	3702	AT2G19800,AT4G26260,AT1G14520,AT5G56640	MIOX2,MIOX4,MIOX1,MIOX5	2.18e-07	0.00077	(2019) Data Mining by Pluralistic Approach on CRISPR Gene Editing in Plants.
PMID	PMID:26017568	3	7	3702	AT4G39950,AT2G22330,AT5G05260	CYP79B2,CYP79B3,CYP79A2	3.4e-07	0.0012	(2015) The maize cytochrome P450 CYP79A61 produces phenylacetaldoxime and indole-3-acetaldoxime in heterologous systems and might contribute to plant defense and auxin formation.
PMID	PMID:23577705	5	98	3702	AT2G19800,AT4G26260,AT1G14520,AT5G56640,AT3G52430	MIOX2,MIOX4,MIOX1,MIOX5,PAD4	3.96e-07	0.0013	(2013) Comparative transcriptome analysis of Gossypium hirsutum L. in response to sap sucking insects: aphid and whitefly.
PMID	PMID:22119077	4	38	3702	AT2G19800,AT4G26260,AT1G14520,AT5G56640	MIOX2,MIOX4,MIOX1,MIOX5	4.12e-07	0.0013	(2012) Transcriptional changes related to secondary wall formation in xylem of transgenic lines of tobacco altered for lignin or xylan content which show improved saccharification.
PMID	PMID:29403524	3	8	3702	AT4G39950,AT2G22330,AT3G52430	CYP79B2,CYP79B3,PAD4	4.66e-07	0.0014	(2018) The Arabidopsis thaliana Knockout Mutant for Phytochelatin Synthase1 (cad1-3) Is Defective in Callose Deposition, Bacterial Pathogen Defense and Auxin Content, But Shows an Increased Stem Lignification.
PMID	PMID:28935979	4	40	3702	AT2G19800,AT4G26260,AT1G14520,AT5G56640	MIOX2,MIOX4,MIOX1,MIOX5	4.99e-07	0.0015	(2017) Intergrative metabolomic and transcriptomic analyses unveil nutrient remobilization events in leaf senescence of tobacco.
PMID	PMID:34975989	4	41	3702	AT4G39950,AT4G08920,AT2G22330,AT1G04400	CYP79B2,CRY1,CYP79B3,CRY2	5.47e-07	0.0016	(2021) Regulation of Growth and Main Health-Promoting Compounds of Chinese Kale Baby-Leaf by UV-A and FR Light.
PMID	PMID:29862250	4	41	3702	AT2G19800,AT4G26260,AT1G14520,AT5G56640	MIOX2,MIOX4,MIOX1,MIOX5	5.47e-07	0.0016	(2018) Genome-Wide Expression Profiles of Hemp (Cannabis sativa L.) in Response to Drought Stress.
PMID	PMID:37645466	4	43	3702	AT4G39950,AT2G22330,AT3G52430,AT3G48090	CYP79B2,CYP79B3,PAD4,EDS1	6.54e-07	0.0018	(2023) N-hydroxypipecolic acid primes plants for enhanced microbial pattern-induced responses.
PMID	PMID:37836165	4	43	3702	AT2G19800,AT4G26260,AT1G14520,AT5G56640	MIOX2,MIOX4,MIOX1,MIOX5	6.54e-07	0.0018	(2023) Transcriptome Analysis Reveals Candidate Genes Involved in Gibberellin-Induced Fruit Development in Rosa roxburghii.
PMID	PMID:32532205	4	43	3702	AT2G19800,AT4G26260,AT1G14520,AT5G56640	MIOX2,MIOX4,MIOX1,MIOX5	6.54e-07	0.0018	(2020) Oak displays common local but specific distant gene regulation responses to different mycorrhizal fungi.
PMID	PMID:32775954	3	10	3702	AT4G39950,AT2G22330,AT5G05260	CYP79B2,CYP79B3,CYP79A2	8.07e-07	0.002	(2020) Biosynthesis of cyanogenic glucosides in Phaseolus lunatus and the evolution of oxime-based defenses.
PMID	PMID:27603208	4	45	3702	AT2G19800,AT4G26260,AT1G14520,AT5G56640	MIOX2,MIOX4,MIOX1,MIOX5	7.75e-07	0.002	(2016) Transcriptomic Profiling Analysis of Arabidopsis thaliana Treated with Exogenous Myo-Inositol.
PMID	PMID:29616052	4	48	3702	AT5G56640,AT5G60980,AT3G52430,AT3G48090	MIOX5,NTF2,PAD4,EDS1	9.87e-07	0.0024	(2018) The Role of Programmed Cell Death Regulator LSD1 in Nematode-Induced Syncytium Formation.
PMID	PMID:24502855	3	11	3702	AT4G39950,AT2G22330,AT5G05260	CYP79B2,CYP79B3,CYP79A2	1.03e-06	0.0024	(2014) Genome survey sequencing provides clues into glucosinolate biosynthesis and flowering pathway evolution in allotetrapolyploid Brassica juncea.
PMID	PMID:23847627	4	49	3702	AT4G39950,AT2G22330,AT3G52430,AT3G48090	CYP79B2,CYP79B3,PAD4,EDS1	1.07e-06	0.0024	(2013) Arabidopsis thaliana-Myzus persicae interaction: shaping the understanding of plant defense against phloem-feeding aphids.
PMID	PMID:35886968	4	50	3702	AT4G39950,AT4G08920,AT2G22330,AT1G04400	CYP79B2,CRY1,CYP79B3,CRY2	1.15e-06	0.0026	(2022) UVA-Radiation Exposure of Different Durations Promoted the Growth, Phytochemicals and Glucosinolate Biosynthesis of Chinese Kale.
PMID	PMID:35631748	3	12	3702	AT4G39950,AT2G22330,AT3G52430	CYP79B2,CYP79B3,PAD4	1.28e-06	0.0027	(2022) The Pattern Recognition Receptor FLS2 Can Shape the Arabidopsis Rhizosphere Microbiome beta-Diversity but Not EFR1 and CERK1.
PMID	PMID:32012755	3	12	3702	AT4G39950,AT2G22330,AT3G52430	CYP79B2,CYP79B3,PAD4	1.28e-06	0.0027	(2020) Impact of Mutations in Arabidopsis thaliana Metabolic Pathways on Polerovirus Accumulation, Aphid Performance, and Feeding Behavior.
PMID	PMID:26352477	3	12	3702	AT4G39950,AT2G22330,AT3G52430	CYP79B2,CYP79B3,PAD4	1.28e-06	0.0027	(2015) A new cyanogenic metabolite in Arabidopsis required for inducible pathogen defence.
PMID	PMID:19180193	4	51	3702	AT4G39950,AT2G19800,AT4G26260,AT3G48090	CYP79B2,MIOX2,MIOX4,EDS1	1.24e-06	0.0027	(2009) DETORQUEO, QUIRKY, and ZERZAUST represent novel components involved in organ development mediated by the receptor-like kinase STRUBBELIG in Arabidopsis thaliana.
PMID	PMID:32784853	3	13	3702	AT4G39950,AT2G22330,AT5G05260	CYP79B2,CYP79B3,CYP79A2	1.58e-06	0.0032	(2020) Tumorous Stem Development of Brassica Juncea: A Complex Regulatory Network of Stem Formation and Identification of Key Genes in Glucosinolate Biosynthesis.
PMID	PMID:20346686	4	55	3702	AT2G19800,AT4G26260,AT1G14520,AT5G56640	MIOX2,MIOX4,MIOX1,MIOX5	1.65e-06	0.0032	(2010) Exploring the impact of wounding and jasmonates on ascorbate metabolism.
PMID	PMID:27802841	3	14	3702	AT3G52430,AT3G48080,AT3G48090	PAD4,EDS1B,EDS1	1.91e-06	0.0037	(2016) Misexpression of AtTX12 encoding a Tollinterleukin-1 receptor domain induces growth defects and expression of defense-related genes partially independently of EDS1 in Arabidopsis.
PMID	PMID:36552869	4	58	3702	AT4G08920,AT1G04400,AT3G52430,AT3G48090	CRY1,CRY2,PAD4,EDS1	2.01e-06	0.0038	(2022) To Be or Not to Be? Are Reactive Oxygen Species, Antioxidants, and Stress Signalling Universal Determinants of Life or Death?
PMID	PMID:36678978	3	15	3702	AT4G39950,AT2G22330,AT5G05260	CYP79B2,CYP79B3,CYP79A2	2.29e-06	0.0042	(2023) Occurrence, Function, and Biosynthesis of the Natural Auxin Phenylacetic Acid (PAA) in Plants.
PMID	PMID:34312531	3	15	3702	AT4G39950,AT2G22330,AT3G52430	CYP79B2,CYP79B3,PAD4	2.29e-06	0.0042	(2021) Host preference and invasiveness of commensal bacteria in the Lotus and Arabidopsis root microbiota.
PMID	PMID:26988219	3	15	3702	AT5G60980,AT3G52430,AT3G48090	NTF2,PAD4,EDS1	2.29e-06	0.0042	(2016) Association analysis for disease resistance to Fusarium oxysporum in cape gooseberry (Physalis peruviana L).
PMID	PMID:31426325	3	16	3702	AT3G52430,AT3G48080,AT3G48090	PAD4,EDS1B,EDS1	2.72e-06	0.0048	(2019) Biotechnological Potential of LSD1, EDS1, and PAD4 in the Improvement of Crops and Industrial Plants.
PMID	PMID:29127104	3	16	3702	AT4G39950,AT2G22330,AT3G48090	CYP79B2,CYP79B3,EDS1	2.72e-06	0.0048	(2017) Chemical suppressors of mlo-mediated powdery mildew resistance.
PMID	PMID:25740259	3	16	3702	AT3G52430,AT3G48080,AT3G48090	PAD4,EDS1B,EDS1	2.72e-06	0.0048	(2015) Autoimmunity conferred by chs3-2D relies on CSA1, its adjacent TNL-encoding neighbour.
PMID	PMID:34975290	4	64	3702	AT4G08920,AT1G04400,AT3G52430,AT3G48090	CRY1,CRY2,PAD4,EDS1	2.92e-06	0.0049	(2021) Modulation of Phototropin Signalosome with Artificial Illumination Holds Great Potential in the Development of Climate-Smart Crops.
PMID	PMID:29930561	4	64	3702	AT4G08920,AT1G04400,AT3G52430,AT3G48090	CRY1,CRY2,PAD4,EDS1	2.92e-06	0.0049	(2018) FAR1-RELATED SEQUENCE (FRS) and FRS-RELATED FACTOR (FRF) Family Proteins in Arabidopsis Growth and Development.
PMID	PMID:34638641	4	67	3702	AT4G39950,AT4G08920,AT2G22330,AT1G04400	CYP79B2,CRY1,CYP79B3,CRY2	3.47e-06	0.0056	(2021) PIF4 and PIF4-Interacting Proteins: At the Nexus of Plant Light, Temperature and Hormone Signal Integrations.
PMID	PMID:36769147	3	18	3702	AT4G39950,AT2G22330,AT5G05260	CYP79B2,CYP79B3,CYP79A2	3.72e-06	0.0059	(2023) Confronting Secondary Metabolites with Water Uptake and Transport in Plants under Abiotic Stress.
PMID	PMID:35807659	3	18	3702	AT4G39950,AT2G22330,AT3G52430	CYP79B2,CYP79B3,PAD4	3.72e-06	0.0059	(2022) Seed Transmission of Pathogens: Non-Canonical Immune Response in Arabidopsis Germinating Seeds Compared to Early Seedlings against the Necrotrophic Fungus Alternaria brassicicola.
PMID	PMID:34484277	4	69	3702	AT2G19800,AT4G26260,AT1G14520,AT5G56640	MIOX2,MIOX4,MIOX1,MIOX5	3.88e-06	0.0059	(2021) Comparative Transcriptomics and Metabolomics Reveal an Intricate Priming Mechanism Involved in PGPR-Mediated Salt Tolerance in Tomato.
PMID	PMID:32117366	3	18	3702	AT4G39950,AT2G22330,AT5G05260	CYP79B2,CYP79B3,CYP79A2	3.72e-06	0.0059	(2020) Aldoxime Metabolism Is Linked to Phenylpropanoid Production in Camelina sativa.
PMID	PMID:31333690	3	18	3702	AT4G39950,AT3G52430,AT3G48090	CYP79B2,PAD4,EDS1	3.72e-06	0.0059	(2019) Transcriptional Insight Into Brassica napus Resistance Genes LepR3 and Rlm2-Mediated Defense Response Against the Leptosphaeria maculans Infection.
PMID	PMID:26997485	3	18	3702	AT4G39950,AT2G22330,AT3G52430	CYP79B2,CYP79B3,PAD4	3.72e-06	0.0059	(2016) Root Endophyte Colletotrichum tofieldiae Confers Plant Fitness Benefits that Are Phosphate Status Dependent.
PMID	PMID:37836106	3	19	3702	AT2G19800,AT4G26260,AT1G14520	MIOX2,MIOX4,MIOX1	4.31e-06	0.0062	(2023) Genome and Transcriptome Analyses of Genes Involved in Ascorbate Biosynthesis in Pepper Indicate Key Genes Related to Fruit Development, Stresses, and Phytohormone Exposures.
PMID	PMID:35449891	3	19	3702	AT4G39950,AT4G08920,AT2G22330	CYP79B2,CRY1,CYP79B3	4.31e-06	0.0062	(2022) Salicylic Acid Regulates Indole-3-Carbinol Biosynthesis Under Blue Light in Broccoli Sprouts (Brassica oleracea L.).
PMID	PMID:36292941	4	73	3702	AT4G39950,AT2G22330,AT3G52430,AT3G48090	CYP79B2,CYP79B3,PAD4,EDS1	4.81e-06	0.0068	(2022) Transcriptomic and Metabolomic Analysis of a Pseudomonas-Resistant versus a Susceptible Arabidopsis Accession.
PMID	PMID:36147238	4	74	3702	AT2G19800,AT4G26260,AT1G14520,AT5G56640	MIOX2,MIOX4,MIOX1,MIOX5	5.06e-06	0.007	(2022) Combined transcriptomic and metabolomic analysis reveals a role for adenosine triphosphate-binding cassette transporters and cell wall remodeling in response to salt stress in strawberry.
PMID	PMID:33452278	3	21	3702	AT4G39950,AT2G22330,AT3G48090	CYP79B2,CYP79B3,EDS1	5.65e-06	0.0077	(2021) Tryptophan-derived metabolites and BAK1 separately contribute to Arabidopsis postinvasive immunity against Alternaria brassicicola.
PMID	PMID:28472137	3	21	3702	AT3G52430,AT3G48080,AT3G48090	PAD4,EDS1B,EDS1	5.65e-06	0.0077	(2017) The highly buffered Arabidopsis immune signaling network conceals the functions of its components.
PMID	PMID:26973671	3	21	3702	AT4G39950,AT3G52430,AT3G48090	CYP79B2,PAD4,EDS1	5.65e-06	0.0077	(2016) Mutation of the Glucosinolate Biosynthesis Enzyme Cytochrome P450 83A1 Monooxygenase Increases Camalexin Accumulation and Powdery Mildew Resistance.
PMID	PMID:36559656	4	78	3702	AT4G39950,AT2G22330,AT3G52430,AT3G48090	CYP79B2,CYP79B3,PAD4,EDS1	6.18e-06	0.0081	(2022) Plant Cell Wall Integrity Perturbations and Priming for Defense.
PMID	PMID:33959967	3	22	3702	AT4G39950,AT2G22330,AT5G05260	CYP79B2,CYP79B3,CYP79A2	6.41e-06	0.0083	(2021) Aldoximes are precursors of auxins in Arabidopsis and maize.
PMID	PMID:34853170	3	23	3702	AT4G39950,AT2G22330,AT3G52430	CYP79B2,CYP79B3,PAD4	7.24e-06	0.0092	(2021) Tryptophan metabolism and bacterial commensals prevent fungal dysbiosis in Arabidopsis roots.
PMID	PMID:32785002	3	24	3702	AT4G39950,AT2G22330,AT5G05260	CYP79B2,CYP79B3,CYP79A2	8.14e-06	0.0103	(2020) Induction of Glucoraphasatin Biosynthesis Genes by MYB29 in Radish (Raphanus sativus L.) Roots.
PMID	PMID:23734157	3	24	3702	AT5G60980,AT3G52430,AT3G48090	NTF2,PAD4,EDS1	8.14e-06	0.0103	(2013) Hop-on hop-off: importin-alpha-guided tours to the nucleus in innate immune signaling.
PMID	PMID:29880735	3	25	3702	AT4G39950,AT2G19800,AT2G22330	CYP79B2,MIOX2,CYP79B3	9.1e-06	0.0112	(2018) Arabidopsis Transcription Factor MYB102 Increases Plant Susceptibility to Aphids by Substantial Activation of Ethylene Biosynthesis.
PMID	PMID:25989254	3	25	3702	AT4G08920,AT3G52430,AT3G48090	CRY1,PAD4,EDS1	9.1e-06	0.0112	(2016) A pair of light signaling factors FHY3 and FAR1 regulates plant immunity by modulating chlorophyll biosynthesis.
PMID	PMID:32117393	3	26	3702	AT4G39950,AT2G22330,AT5G05260	CYP79B2,CYP79B3,CYP79A2	1.01e-05	0.0122	(2020) Characterization of Arabidopsis CYP79C1 and CYP79C2 by Glucosinolate Pathway Engineering in Nicotiana benthamiana Shows Substrate Specificity Toward a Range of Aliphatic and Aromatic Amino Acids.
PMID	PMID:27757119	3	26	3702	AT4G39950,AT2G22330,AT5G05260	CYP79B2,CYP79B3,CYP79A2	1.01e-05	0.0122	(2016) Comparative Transcriptome Analyses Reveal a Special Glucosinolate Metabolism Mechanism in Brassica alboglabra Sprouts.
PMID	PMID:31808940	3	27	3702	AT4G39950,AT2G22330,AT5G05260	CYP79B2,CYP79B3,CYP79A2	1.13e-05	0.0132	(2020) GH3 Auxin-Amido Synthetases Alter the Ratio of Indole-3-Acetic Acid and Phenylacetic Acid in Arabidopsis.
PMID	PMID:39253954	2	3	3702	AT4G08920,AT1G04400	CRY1,CRY2	2.06e-05	0.0143	(2025) Photoexcited Cryptochrome 1 Interacts With SPCHLESS to Regulate Stomatal Development in Arabidopsis.
PMID	PMID:39549699	2	2	3702	AT4G08920,AT1G04400	CRY1,CRY2	1.24e-05	0.0143	(2025) The Arabidopsis blue-light photoreceptor CRY2 is active in darkness to inhibit root growth.
PMID	PMID:39746451	2	3	3702	AT4G08920,AT1G04400	CRY1,CRY2	2.06e-05	0.0143	(2025) Dissecting sequence-structure-function-diversity in plant cryptochromes.
PMID	PMID:39883074	2	4	3702	AT4G08920,AT1G04400	CRY1,CRY2	3.08e-05	0.0143	(2025) Phototropin 2 mediates daily cold priming to promote light responses in Arabidopsis.
PMID	PMID:40052249	2	3	3702	AT4G08920,AT1G04400	CRY1,CRY2	2.06e-05	0.0143	(2025) Cryptochrome 1 promotes photomorphogenesis in Arabidopsis by displacing substrates from the COP1 ubiquitin ligase.
PMID	PMID:37851863	2	3	3702	AT3G52430,AT3G48090	PAD4,EDS1	2.06e-05	0.0143	(2024) The NLR immune receptor ADR1 and lipase-like proteins EDS1 and PAD4 mediate stomatal immunity in Nicotiana benthamiana and Arabidopsis.
PMID	PMID:37952108	2	2	3702	AT3G52430,AT3G48090	PAD4,EDS1	1.24e-05	0.0143	(2024) Leaf abaxial immunity to powdery mildew in Arabidopsis is conferred by multiple defense mechanisms.
PMID	PMID:37976211	2	4	3702	AT3G52430,AT3G48090	PAD4,EDS1	3.08e-05	0.0143	(2024) Arabidopsis PHYTOALEXIN DEFICIENT 4 promotes the maturation and nuclear accumulation of immune-related cysteine protease RD19.
PMID	PMID:38181854	2	3	3702	AT4G28190,AT2G20825	ULT1,ULT2	2.06e-05	0.0143	(2024) ULTRAPETALAs in action: Unraveling their role in root development.
PMID	PMID:38305934	2	4	3702	AT4G08920,AT1G04400	CRY1,CRY2	3.08e-05	0.0143	(2024) PHOTOTROPIN1 lysine 526 functions to enhance phototropism in Arabidopsis.
PMID	PMID:38478507	2	5	3702	AT3G52430,AT3G48090	PAD4,EDS1	4.31e-05	0.0143	(2024) Subtilisin-like proteases from Fusarium graminearum induce plant cell death and contribute to virulence.
PMID	PMID:38517890	2	6	3702	AT3G52430,AT3G48090	PAD4,EDS1	5.74e-05	0.0143	(2024) Bacillus cereus NJ01 induces SA- and ABA-mediated immunity against bacterial pathogens through the EDS1-WRKY18 module.
PMID	PMID:38542169	2	3	3702	AT3G52430,AT3G48090	PAD4,EDS1	2.06e-05	0.0143	(2024) METACASPASE8 (MC8) Is a Crucial Protein in the LSD1-Dependent Cell Death Pathway in Response to Ultraviolet Stress.
PMID	PMID:38635077	2	5	3702	AT4G08920,AT1G04400	CRY1,CRY2	4.31e-05	0.0143	(2024) Disrupting FKF1 homodimerization increases FT transcript levels in the evening by enhancing CO stabilization.
PMID	PMID:39509471	2	4	3702	AT3G52430,AT3G48090	PAD4,EDS1	3.08e-05	0.0143	(2024) Activation of a helper NLR by plant and bacterial TIR immune signaling.
PMID	PMID:39632458	2	5	3702	AT4G08920,AT1G04400	CRY1,CRY2	4.31e-05	0.0143	(2024) Genome-wide identification and characterization of potato NRL gene family and functional analysis of StNRL-6 in response to Phytophthora infestans.
RCTM	MAP-1855183	5	12	3702	AT2G19800,AT4G26260,AT1G14520,AT1G31190,AT5G56640	MIOX2,MIOX4,MIOX1,IMPL1,MIOX5	3.07e-11	2.57e-08	Synthesis of IP2, IP, and Ins in the cytosol
RCTM	MAP-1483249	5	30	3702	AT2G19800,AT4G26260,AT1G14520,AT1G31190,AT5G56640	MIOX2,MIOX4,MIOX1,IMPL1,MIOX5	1.58e-09	6.61e-07	Inositol phosphate metabolism
RCTM	MAP-389661	3	58	3702	AT5G28310,AT2G45630,AT1G12550	T8M17.80,F17K2.16,HPR3	9.67e-05	0.027	Glyoxylate metabolism and glycine degradation
WikiPathways	WP4598	3	11	3702	AT4G39950,AT2G22330,AT5G05260	CYP79B2,CYP79B3,CYP79A2	1.03e-06	2.36e-05	Glucosinolate biosynthesis (from aromatic amino acid)
NetworkNeighborAL	CL:9059	6	16	3702	AT2G44230,AT1G04090,AT5G18490,AT5G43950,AT3G04350,AT3G01870	F4I1.4,F20D22.17,T28N17.2,MRH10.5,T6K12.3,F28J7.20	4.69e-13	2.63e-09	Vacuolar protein sorting-associated protein 62, and Amino acid transport across the plasma membrane

## Sheet: Table S2
Table S2. Enrcihment obtained from A. thaliana genes inside orthogroups with lower scaled NS/S in aquatic plants.
category	term	number_of_genes	number_of_genes_in_background	ncbiTaxonId	inputGenes	preferredNames	p_value	fdr	description
COMPARTMENTS	GOCC:0005654	18	568	3702	AT1G76940,AT4G16810,AT1G21320,AT1G51510,AT2G41500,AT3G19150,AT4G19560,AT5G61270,AT3G21060,AT4G19600,AT5G53430,AT1G27630,AT1G35440,AT5G48820,AT5G45190,AT3G24810,AT3G61740,AT4G27910	NSRA,Dl4430c,NSRB,Y14,LIS,KRP6,CYCT1-2,BHLH72,RBL-2,CYCT1-4,ATX5,CYCT1-3,CYCT1-1,KRP3,CYCT1-5,KRP5,ATX3,ATX4	2.53e-09	4.08e-06	Nucleoplasm
COMPARTMENTS	GOCC:0031981	24	1068	3702	AT1G76940,AT4G16810,AT1G21320,AT1G49250,AT1G51510,AT3G28925,AT2G41500,AT2G47420,AT3G19150,AT2G46980,AT1G08130,AT4G19560,AT5G61270,AT3G21060,AT4G19600,AT5G53430,AT1G27630,AT1G35440,AT5G48600,AT5G48820,AT5G45190,AT3G24810,AT3G61740,AT4G27910	NSRA,Dl4430c,NSRB,F13F21.31,Y14,F4J1Q3_ARATH,LIS,DIM1A,KRP6,ASY3,LIG1,CYCT1-2,BHLH72,RBL-2,CYCT1-4,ATX5,CYCT1-3,CYCT1-1,SMC4,KRP3,CYCT1-5,KRP5,ATX3,ATX4	3.69e-09	4.08e-06	Nuclear lumen
COMPARTMENTS	GOCC:0008024	5	11	3702	AT4G19560,AT4G19600,AT1G27630,AT1G35440,AT5G45190	CYCT1-2,CYCT1-4,CYCT1-3,CYCT1-1,CYCT1-5	1.66e-08	8.93e-06	cyclin/CDK positive transcription elongation factor complex
COMPARTMENTS	GOCC:0043227	88	10740	3702	AT3G22120,AT3G02030,AT5G41130,AT1G76940,AT4G16810,AT1G21320,AT1G49250,AT1G04020,AT1G51510,AT1G12100,AT3G28925,AT3G26820,AT4G05523,AT5G03470,AT3G09880,AT2G41500,AT2G47420,AT1G12090,AT2G46740,AT2G46760,AT2G31040,AT1G07890,AT3G19150,AT1G13120,AT2G46980,AT4G12480,AT1G08130,AT4G19560,AT5G61270,AT3G21060,AT2G47040,AT2G23430,AT1G19710,AT2G46750,AT5G25350,AT2G26450,AT1G75420,AT3G59060,AT1G60995,AT2G32710…	CWLP,F1C9.19,MEE6.20,NSRA,Dl4430c,NSRB,F13F21.31,BARD1,Y14,F12F1.2,F4J1Q3_ARATH,F4JDQ6_ARATH,F4JGH3_ARATH,B'ALPHA,B'BETA,LIS,DIM1A,ELP,GULLO5,GULLO6,CGL160,APX1,KRP6,GLE1,ASY3,EARLI1,LIG1,CYCT1-2,BHLH72,RBL-2,PME5,KRP1-2,AT1G19710,GULLO2,EBF2,PME13,AT1G75420,PIF5,T7P1.14,KRP4,CYCT1-4,ATX5,EMF2,CYCT1-3,B'THETA,B'GAMMA,BRCA1,SNRNP35,PIF4,PTC52,VRN2,RH22,KRP7,GULLO1,CYCT1-1,ALC,SMC4,KRP3,CYCT1-5,MEE…	3.18e-07	7.06e-05	Membrane-bounded organelle
COMPARTMENTS	GOCC:1990234	18	826	3702	AT4G16810,AT1G04020,AT3G20760,AT4G19560,AT3G21060,AT5G25350,AT4G19600,AT5G53430,AT1G27630,AT4G21070,AT1G51130,AT1G35440,AT5G45190,AT5G52820,AT3G61740,AT2G05720,AT4G27910,AT5G66750	Dl4430c,BARD1,NSE4B,CYCT1-2,RBL-2,EBF2,CYCT1-4,ATX5,CYCT1-3,BRCA1,NSE4A,CYCT1-1,CYCT1-5,NLE1,ATX3,T3P4.4,ATX4,DDM1	6.12e-07	9.85e-05	Transferase complex
COMPARTMENTS	GOCC:0005634	47	4453	3702	AT1G76940,AT4G16810,AT1G21320,AT1G49250,AT1G04020,AT1G51510,AT3G28925,AT4G05523,AT5G03470,AT3G09880,AT2G41500,AT2G47420,AT3G19150,AT1G13120,AT2G46980,AT1G08130,AT4G19560,AT5G61270,AT3G21060,AT2G23430,AT5G25350,AT2G26450,AT3G59060,AT2G32710,AT4G19600,AT5G53430,AT5G51230,AT1G27630,AT4G15415,AT4G21070,AT2G43370,AT2G43010,AT4G16845,AT1G49620,AT1G35440,AT5G67110,AT5G48600,AT5G48820,AT5G45190,AT4G36930…	NSRA,Dl4430c,NSRB,F13F21.31,BARD1,Y14,F4J1Q3_ARATH,F4JGH3_ARATH,B'ALPHA,B'BETA,LIS,DIM1A,KRP6,GLE1,ASY3,LIG1,CYCT1-2,BHLH72,RBL-2,KRP1-2,EBF2,PME13,PIF5,KRP4,CYCT1-4,ATX5,EMF2,CYCT1-3,B'GAMMA,BRCA1,SNRNP35,PIF4,VRN2,KRP7,CYCT1-1,ALC,SMC4,KRP3,CYCT1-5,SPT,KRP5,ATX3,EBF1,XPO1,PME45,ATX4,DDM1	1.95e-06	0.00028	Nucleus
COMPARTMENTS	GOCC:0010287	6	64	3702	AT3G02030,AT5G41130,AT3G26820,AT5G41120,AT3G26840,AT1G54570	F1C9.19,MEE6.20,F4JDQ6_ARATH,MEE6.19,PES2,PES1	2.04e-06	0.00028	Plastoglobule
COMPARTMENTS	GOCC:0035097	5	37	3702	AT4G16810,AT3G21060,AT5G53430,AT3G61740,AT4G27910	Dl4430c,RBL-2,ATX5,ATX3,ATX4	2.9e-06	0.00036	Histone methyltransferase complex
COMPARTMENTS	GOCC:0048188	4	16	3702	AT3G21060,AT5G53430,AT3G61740,AT4G27910	RBL-2,ATX5,ATX3,ATX4	3.5e-06	0.00036	Set1C/COMPASS complex
COMPARTMENTS	GOCC:0070691	3	3	3702	AT4G19600,AT1G27630,AT5G45190	CYCT1-4,CYCT1-3,CYCT1-5	2.92e-06	0.00036	P-TEFb complex
COMPARTMENTS	GOCC:0034708	6	73	3702	AT4G16810,AT3G21060,AT5G53430,AT3G61740,AT4G27910,AT5G66750	Dl4430c,RBL-2,ATX5,ATX3,ATX4,DDM1	4.15e-06	0.00039	Methyltransferase complex
COMPARTMENTS	GOCC:0000159	4	18	3702	AT5G03470,AT1G13460,AT4G15415,AT3G21650	B'ALPHA,B'THETA,B'GAMMA,B'ZETA	5.24e-06	0.00047	Protein phosphatase type 2A complex
COMPARTMENTS	GOCC:0000800	3	5	3702	AT3G28925,AT2G46980,AT5G48600	F4J1Q3_ARATH,ASY3,SMC4	8.12e-06	0.00069	Lateral element
COMPARTMENTS	GOCC:1902494	23	1563	3702	AT4G16810,AT1G04020,AT3G13330,AT3G20760,AT5G03470,AT4G19560,AT3G21060,AT5G25350,AT4G19600,AT5G53430,AT1G27630,AT1G13460,AT4G15415,AT4G21070,AT1G51130,AT1G35440,AT5G45190,AT5G52820,AT3G21650,AT3G61740,AT2G05720,AT4G27910,AT5G66750	Dl4430c,BARD1,PA200,NSE4B,B'ALPHA,CYCT1-2,RBL-2,EBF2,CYCT1-4,ATX5,CYCT1-3,B'THETA,B'GAMMA,BRCA1,NSE4A,CYCT1-1,CYCT1-5,NLE1,B'ZETA,ATX3,T3P4.4,ATX4,DDM1	1.13e-05	0.00091	Catalytic complex
COMPARTMENTS	GOCC:0043231	80	10135	3702	AT3G02030,AT5G41130,AT1G76940,AT4G16810,AT1G21320,AT1G49250,AT1G04020,AT1G51510,AT1G12100,AT3G28925,AT3G26820,AT4G05523,AT5G03470,AT3G09880,AT2G41500,AT2G47420,AT2G46740,AT2G46760,AT2G31040,AT1G07890,AT3G19150,AT1G13120,AT2G46980,AT4G12480,AT1G08130,AT4G19560,AT5G61270,AT3G21060,AT2G47040,AT2G23430,AT1G19710,AT2G46750,AT5G25350,AT2G26450,AT1G75420,AT3G59060,AT1G60995,AT2G32710,AT4G19600,AT5G53430…	F1C9.19,MEE6.20,NSRA,Dl4430c,NSRB,F13F21.31,BARD1,Y14,F12F1.2,F4J1Q3_ARATH,F4JDQ6_ARATH,F4JGH3_ARATH,B'ALPHA,B'BETA,LIS,DIM1A,GULLO5,GULLO6,CGL160,APX1,KRP6,GLE1,ASY3,EARLI1,LIG1,CYCT1-2,BHLH72,RBL-2,PME5,KRP1-2,AT1G19710,GULLO2,EBF2,PME13,AT1G75420,PIF5,T7P1.14,KRP4,CYCT1-4,ATX5,EMF2,CYCT1-3,B'THETA,B'GAMMA,BRCA1,SNRNP35,PIF4,PTC52,VRN2,RH22,KRP7,GULLO1,CYCT1-1,ALC,SMC4,KRP3,CYCT1-5,MEE6.19,GULL…	1.23e-05	0.00094	Intracellular membrane-bounded organelle
COMPARTMENTS	GOCC:0043226	94	12757	3702	AT3G22120,AT3G02030,AT5G41130,AT1G76940,AT4G16810,AT1G21320,AT1G49250,AT1G04020,AT1G51510,AT1G12100,AT3G28925,AT3G26820,AT3G20760,AT4G05523,AT5G03470,AT3G09880,AT2G41500,AT2G47420,AT2G32980,AT1G12090,AT2G46740,AT2G46760,AT2G31040,AT1G07890,AT3G19150,AT1G13120,AT2G46980,AT4G12480,AT5G27870,AT1G08130,AT4G19560,AT5G61270,AT3G21060,AT2G47040,AT2G23430,AT1G19710,AT2G46750,AT5G25350,AT2G26450,AT1G75420…	CWLP,F1C9.19,MEE6.20,NSRA,Dl4430c,NSRB,F13F21.31,BARD1,Y14,F12F1.2,F4J1Q3_ARATH,F4JDQ6_ARATH,NSE4B,F4JGH3_ARATH,B'ALPHA,B'BETA,LIS,DIM1A,AUG2,ELP,GULLO5,GULLO6,CGL160,APX1,KRP6,GLE1,ASY3,EARLI1,PME28,LIG1,CYCT1-2,BHLH72,RBL-2,PME5,KRP1-2,AT1G19710,GULLO2,EBF2,PME13,AT1G75420,PIF5,T7P1.14,PME21,KRP4,CYCT1-4,ATX5,EMF2,CYCT1-3,B'THETA,B'GAMMA,BRCA1,SNRNP35,PIF4,PTC52,VRN2,RH22,KRP7,GULLO1,NSE4A,CYCT…	1.56e-05	0.0011	Organelle
COMPARTMENTS	GOCC:0043229	92	12405	3702	AT3G22120,AT3G02030,AT5G41130,AT1G76940,AT4G16810,AT1G21320,AT1G49250,AT1G04020,AT1G51510,AT1G12100,AT3G28925,AT3G26820,AT3G20760,AT4G05523,AT5G03470,AT3G09880,AT2G41500,AT2G47420,AT2G32980,AT1G12090,AT2G46740,AT2G46760,AT2G31040,AT1G07890,AT3G19150,AT1G13120,AT2G46980,AT4G12480,AT1G08130,AT4G19560,AT5G61270,AT3G21060,AT2G47040,AT2G23430,AT1G19710,AT2G46750,AT5G25350,AT2G26450,AT1G75420,AT3G59060…	CWLP,F1C9.19,MEE6.20,NSRA,Dl4430c,NSRB,F13F21.31,BARD1,Y14,F12F1.2,F4J1Q3_ARATH,F4JDQ6_ARATH,NSE4B,F4JGH3_ARATH,B'ALPHA,B'BETA,LIS,DIM1A,AUG2,ELP,GULLO5,GULLO6,CGL160,APX1,KRP6,GLE1,ASY3,EARLI1,LIG1,CYCT1-2,BHLH72,RBL-2,PME5,KRP1-2,AT1G19710,GULLO2,EBF2,PME13,AT1G75420,PIF5,T7P1.14,KRP4,CYCT1-4,ATX5,EMF2,CYCT1-3,B'THETA,B'GAMMA,BRCA1,SNRNP35,PIF4,PTC52,VRN2,RH22,KRP7,GULLO1,NSE4A,CYCT1-1,ALC,SMC4…	1.71e-05	0.0012	Intracellular organelle
COMPARTMENTS	GOCC:0005622	111	16397	3702	AT3G22120,AT3G02030,AT4G02120,AT5G41130,AT1G76940,AT4G16810,AT1G21320,AT1G35420,AT1G09620,AT1G49250,AT1G04020,AT1G30820,AT1G51510,AT1G12100,AT3G28925,AT3G13330,AT3G48070,AT3G26820,AT3G20760,AT4G05523,AT5G03470,AT3G09880,AT2G41500,AT2G47420,AT2G32980,AT2G34890,AT1G12090,AT2G46740,AT2G46760,AT2G31040,AT5G18070,AT1G07890,AT3G19150,AT1G13120,AT2G46980,AT4G20320,AT3G09640,AT4G12480,AT5G27870,AT1G08130…	CWLP,F1C9.19,T10M13.13,MEE6.20,NSRA,Dl4430c,NSRB,F12A4.4,SYLC_ARATH,F13F21.31,BARD1,T17H7.12,Y14,F12F1.2,F4J1Q3_ARATH,PA200,F4JCT1_ARATH,F4JDQ6_ARATH,NSE4B,F4JGH3_ARATH,B'ALPHA,B'BETA,LIS,DIM1A,AUG2,F19I3.12,ELP,GULLO5,GULLO6,CGL160,DRT101,APX1,KRP6,GLE1,ASY3,F1C12.230,APX2,EARLI1,PME28,LIG1,CYCT1-2,BHLH72,RBL-2,PME5,KRP1-2,AT1G19710,GULLO2,EBF2,PME13,AT1G75420,PIF5,T7P1.14,PME21,KRP4,CYCT1-4,ATX…	4.33e-05	0.0028	Intracellular
COMPARTMENTS	GOCC:0055044	8	240	3702	AT1G12100,AT1G07890,AT4G12480,AT4G12520,AT4G12530,AT4G12500,AT4G12490,AT4G12470	F12F1.2,APX1,EARLI1,T1P17.100,T1P17.120,T1P17.90,T1P17.80,AZI1	5.77e-05	0.0036	Symplast
COMPARTMENTS	GOCC:0009506	7	208	3702	AT1G12100,AT4G12480,AT4G12520,AT4G12530,AT4G12500,AT4G12490,AT4G12470	F12F1.2,EARLI1,T1P17.100,T1P17.120,T1P17.90,T1P17.80,AZI1	0.00016	0.008	Plasmodesma
COMPARTMENTS	GOCC:0031436	2	2	3702	AT1G04020,AT4G21070	BARD1,BRCA1	0.00017	0.0082	BRCA1-BARD1 complex
COMPARTMENTS	GOCC:0070533	2	2	3702	AT1G04020,AT4G21070	BARD1,BRCA1	0.00017	0.0082	BRCA1-C complex
COMPARTMENTS	GOCC:0005963	3	20	3702	AT5G03470,AT1G13460,AT4G15415	B'ALPHA,B'THETA,B'GAMMA	0.00024	0.0111	Magnesium-dependent protein serine/threonine phosphatase complex
COMPARTMENTS	GOCC:0001673	2	3	3702	AT3G19150,AT1G49620	KRP6,KRP7	0.00028	0.0125	Male germ cell nucleus
COMPARTMENTS	GOCC:0097268	2	3	3702	AT2G34890,AT4G20320	F19I3.12,F1C12.230	0.00028	0.0125	Cytoophidium
COMPARTMENTS	GOCC:0000793	5	104	3702	AT3G28925,AT3G20760,AT2G46980,AT1G51130,AT5G48600	F4J1Q3_ARATH,NSE4B,ASY3,NSE4A,SMC4	0.0003	0.0127	Condensed chromosome
COMPARTMENTS	GOCC:0090406	5	118	3702	AT2G47030,AT3G62170,AT2G47040,AT3G06830,AT5G49180	PME4,VGDH2,PME5,PME23,PME58	0.00052	0.021	Pollen tube
COMPARTMENTS	GOCC:0016607	4	67	3702	AT1G76940,AT1G21320,AT2G41500,AT5G61270	NSRA,NSRB,LIS,BHLH72	0.00057	0.0223	Nuclear speck
COMPARTMENTS	GOCC:0030054	8	340	3702	AT1G12100,AT1G07890,AT4G12480,AT4G12520,AT4G12530,AT4G12500,AT4G12490,AT4G12470	F12F1.2,APX1,EARLI1,T1P17.100,T1P17.120,T1P17.90,T1P17.80,AZI1	0.00057	0.0223	Cell junction
COMPARTMENTS	GOCC:0030892	2	5	3702	AT3G28925,AT5G48600	F4J1Q3_ARATH,SMC4	0.00058	0.0223	Mitotic cohesin complex
COMPARTMENTS	GOCC:0042995	8	340	3702	AT2G44980,AT2G47030,AT3G62170,AT2G47040,AT3G59060,AT3G06830,AT2G43010,AT5G49180	CHR10,PME4,VGDH2,PME5,PIF5,PME23,PIF4,PME58	0.00057	0.0223	Cell projection
COMPARTMENTS	GOCC:0016604	5	124	3702	AT1G76940,AT1G21320,AT1G51510,AT2G41500,AT5G61270	NSRA,NSRB,Y14,LIS,BHLH72	0.00065	0.0227	Nuclear body
COMPARTMENTS	GOCC:0030893	2	6	3702	AT3G28925,AT5G48600	F4J1Q3_ARATH,SMC4	0.00077	0.0264	Meiotic cohesin complex
COMPARTMENTS	GOCC:0044614	2	6	3702	AT4G05523,AT1G13120	F4JGH3_ARATH,GLE1	0.00077	0.0264	Nuclear pore cytoplasmic filaments
COMPARTMENTS	GOCC:0110165	122	19635	3702	AT3G22120,AT3G02030,AT4G02120,AT5G41130,AT1G76940,AT4G16810,AT1G21320,AT1G09440,AT1G49250,AT1G04020,AT1G30820,AT1G51510,AT1G12100,AT2G22530,AT2G44980,AT3G28925,AT3G26820,AT3G20760,AT4G05523,AT5G03470,AT3G09880,AT2G41500,AT2G47420,AT2G32980,AT2G34890,AT1G12090,AT2G47030,AT2G46740,AT2G46760,AT2G31040,AT5G18070,AT1G07890,AT3G19150,AT1G13120,AT2G46980,AT4G20320,AT3G09640,AT2G26650,AT5G46900,AT4G12480…	CWLP,F1C9.19,T10M13.13,MEE6.20,NSRA,Dl4430c,NSRB,F14J9.10,F13F21.31,BARD1,T17H7.12,Y14,F12F1.2,F14M13.7,CHR10,F4J1Q3_ARATH,F4JDQ6_ARATH,NSE4B,F4JGH3_ARATH,B'ALPHA,B'BETA,LIS,DIM1A,AUG2,F19I3.12,ELP,PME4,GULLO5,GULLO6,CGL160,DRT101,APX1,KRP6,GLE1,ASY3,F1C12.230,APX2,AKT1,extA,EARLI1,PME28,LIG1,CYCT1-2,BHLH72,RBL-2,VGDH2,PME5,KRP1-2,AT1G19710,GULLO2,EBF2,PME13,AT1G75420,F25P12.84,PIF5,T7P1.14,PME21…	0.00089	0.0282	Cellular anatomical entity
COMPARTMENTS	GOCC:0009707	4	78	3702	AT4G12480,AT4G12500,AT4G12490,AT4G12470	EARLI1,T1P17.90,T1P17.80,AZI1	0.00098	0.0303	Chloroplast outer membrane
COMPARTMENTS	GOCC:0070531	2	7	3702	AT1G04020,AT4G21070	BARD1,BRCA1	0.00099	0.0303	BRCA1-A complex
COMPARTMENTS	GOCC:0030915	2	8	3702	AT3G20760,AT1G51130	NSE4B,NSE4A	0.0012	0.036	Smc5-Smc6 complex
COMPARTMENTS	GOCC:0097740	2	8	3702	AT3G59060,AT2G43010	PIF5,PIF4	0.0012	0.036	Paraflagellar rod
Process	GO:0031399	17	210	3702	AT1G04020,AT3G19150,AT4G19560,AT2G23430,AT2G32710,AT4G19600,AT5G53430,AT1G27630,AT4G21070,AT1G49620,AT1G35440,AT5G48820,AT5G45190,AT3G24810,AT3G61740,AT4G27910,AT5G66750	BARD1,KRP6,CYCT1-2,KRP1-2,KRP4,CYCT1-4,ATX5,CYCT1-3,BRCA1,KRP7,CYCT1-1,KRP3,CYCT1-5,KRP5,ATX3,ATX4,DDM1	5.73e-15	1.19e-11	Regulation of protein modification process
Process	GO:0000079	11	62	3702	AT3G19150,AT4G19560,AT2G23430,AT2G32710,AT4G19600,AT1G27630,AT1G49620,AT1G35440,AT5G48820,AT5G45190,AT3G24810	KRP6,CYCT1-2,KRP1-2,KRP4,CYCT1-4,CYCT1-3,KRP7,CYCT1-1,KRP3,CYCT1-5,KRP5	1.79e-13	2.58e-10	Regulation of cyclin-dependent protein serine/threonine kinase activity
Process	GO:0031400	9	36	3702	AT1G04020,AT3G19150,AT2G23430,AT2G32710,AT4G21070,AT1G49620,AT5G48820,AT3G24810,AT5G66750	BARD1,KRP6,KRP1-2,KRP4,BRCA1,KRP7,KRP3,KRP5,DDM1	2.02e-12	1.66e-09	Negative regulation of protein modification process
Process	GO:0031401	11	80	3702	AT1G04020,AT4G19560,AT4G19600,AT5G53430,AT1G27630,AT4G21070,AT1G35440,AT5G45190,AT3G61740,AT4G27910,AT5G66750	BARD1,CYCT1-2,CYCT1-4,ATX5,CYCT1-3,BRCA1,CYCT1-1,CYCT1-5,ATX3,ATX4,DDM1	2.19e-12	1.66e-09	Positive regulation of protein modification process
Process	GO:0042325	12	111	3702	AT5G03470,AT3G19150,AT4G19560,AT2G23430,AT2G32710,AT4G19600,AT1G27630,AT1G49620,AT1G35440,AT5G48820,AT5G45190,AT3G24810	B'ALPHA,KRP6,CYCT1-2,KRP1-2,KRP4,CYCT1-4,CYCT1-3,KRP7,CYCT1-1,KRP3,CYCT1-5,KRP5	2.85e-12	1.83e-09	Regulation of phosphorylation
Process	GO:0051247	13	180	3702	AT1G04020,AT3G13330,AT4G19560,AT1G60995,AT4G19600,AT5G53430,AT1G27630,AT4G21070,AT1G35440,AT5G45190,AT3G61740,AT4G27910,AT5G66750	BARD1,PA200,CYCT1-2,T7P1.14,CYCT1-4,ATX5,CYCT1-3,BRCA1,CYCT1-1,CYCT1-5,ATX3,ATX4,DDM1	3.89e-11	1.5e-08	Positive regulation of protein metabolic process
Process	GO:0019853	7	20	3702	AT2G46740,AT2G46760,AT2G46750,AT1G32300,AT5G56490,AT5G56470,AT5G11540	GULLO5,GULLO6,GULLO2,GULLO1,GULLO4,GULLO7,GULLO3	8.53e-11	3.07e-08	L-ascorbic acid biosynthetic process
Process	GO:0051246	22	739	3702	AT1G04020,AT1G51510,AT3G13330,AT4G05523,AT3G19150,AT1G13120,AT4G19560,AT2G23430,AT1G60995,AT2G32710,AT4G19600,AT5G53430,AT1G27630,AT4G21070,AT1G49620,AT1G35440,AT5G48820,AT5G45190,AT3G24810,AT3G61740,AT4G27910,AT5G66750	BARD1,Y14,PA200,F4JGH3_ARATH,KRP6,GLE1,CYCT1-2,KRP1-2,T7P1.14,KRP4,CYCT1-4,ATX5,CYCT1-3,BRCA1,KRP7,CYCT1-1,KRP3,CYCT1-5,KRP5,ATX3,ATX4,DDM1	1.15e-10	3.5e-08	Regulation of protein metabolic process
Process	GO:0044210	5	6	3702	AT4G02120,AT1G30820,AT2G34890,AT4G20320,AT3G12670	T10M13.13,T17H7.12,F19I3.12,F1C12.230,T2E22.2	1.8e-09	3.45e-07	De novo CTP biosynthetic process
Process	GO:0045490	9	99	3702	AT2G47030,AT5G27870,AT3G62170,AT2G47040,AT2G26450,AT3G05610,AT3G06830,AT5G49180,AT4G33230	PME4,PME28,VGDH2,PME5,PME13,PME21,PME23,PME58,PME45	6.72e-09	1.05e-06	Pectin catabolic process
Process	GO:0031058	6	26	3702	AT1G04020,AT5G53430,AT4G21070,AT3G61740,AT4G27910,AT5G66750	BARD1,ATX5,BRCA1,ATX3,ATX4,DDM1	1.66e-08	2.52e-06	Positive regulation of histone modification
Process	GO:0051726	12	257	3702	AT3G19150,AT2G46980,AT4G19560,AT2G23430,AT2G32710,AT4G19600,AT1G27630,AT1G49620,AT1G35440,AT5G48820,AT5G45190,AT3G24810	KRP6,ASY3,CYCT1-2,KRP1-2,KRP4,CYCT1-4,CYCT1-3,KRP7,CYCT1-1,KRP3,CYCT1-5,KRP5	2.39e-08	3.54e-06	Regulation of cell cycle
Process	GO:0007049	17	598	3702	AT5G03470,AT3G09880,AT2G32980,AT3G19150,AT2G46980,AT1G08130,AT4G19560,AT2G23430,AT2G32710,AT4G19600,AT1G27630,AT1G49620,AT1G35440,AT5G48600,AT5G48820,AT5G45190,AT3G24810	B'ALPHA,B'BETA,AUG2,KRP6,ASY3,LIG1,CYCT1-2,KRP1-2,KRP4,CYCT1-4,CYCT1-3,KRP7,CYCT1-1,SMC4,KRP3,CYCT1-5,KRP5	3.38e-08	4.64e-06	Cell cycle
Process	GO:0005975	23	1126	3702	AT2G47030,AT2G46740,AT2G46760,AT5G18070,AT5G27870,AT3G62170,AT2G47040,AT2G46750,AT2G26450,AT5G12960,AT3G05610,AT3G06830,AT1G32300,AT5G49180,AT5G56490,AT5G56470,AT3G18080,AT3G18070,AT5G10160,AT5G12950,AT5G11540,AT2G22230,AT4G33230	PME4,GULLO5,GULLO6,DRT101,PME28,VGDH2,PME5,GULLO2,PME13,T24H18.130,PME21,PME23,GULLO1,PME58,GULLO4,GULLO7,BGLU44,BGLU43,T31P16.150,T24H18.120,GULLO3,T26C19.11,PME45	4.52e-08	6.06e-06	Carbohydrate metabolic process
Process	GO:0019856	5	15	3702	AT4G02120,AT1G30820,AT2G34890,AT4G20320,AT3G12670	T10M13.13,T17H7.12,F19I3.12,F1C12.230,T2E22.2	5.81e-08	7.6e-06	Pyrimidine nucleobase biosynthetic process
Process	GO:0042545	9	144	3702	AT2G47030,AT5G27870,AT3G62170,AT2G47040,AT2G26450,AT3G05610,AT3G06830,AT5G49180,AT4G33230	PME4,PME28,VGDH2,PME5,PME13,PME21,PME23,PME58,PME45	1.4e-07	1.61e-05	Cell wall modification
Process	GO:0000054	5	19	3702	AT3G03110,AT4G19210,AT3G13640,AT4G30300,AT5G17020	XPO1B,ABCE2,ABCE1,ABCE3,XPO1	1.57e-07	1.77e-05	Ribosomal subunit export from nucleus
Process	GO:0051168	7	69	3702	AT3G03110,AT4G05523,AT1G13120,AT4G19210,AT3G13640,AT4G30300,AT5G17020	XPO1B,F4JGH3_ARATH,GLE1,ABCE2,ABCE1,ABCE3,XPO1	1.69e-07	1.8e-05	Nuclear export
Process	GO:0045787	6	41	3702	AT4G19560,AT4G19600,AT1G27630,AT1G35440,AT5G45190,AT3G24810	CYCT1-2,CYCT1-4,CYCT1-3,CYCT1-1,CYCT1-5,KRP5	1.84e-07	1.93e-05	Positive regulation of cell cycle
Process	GO:0009987	103	13552	3702	AT3G02030,AT4G02120,AT5G41130,AT1G09440,AT1G09620,AT1G49250,AT1G04020,AT1G30820,AT1G51510,AT2G22530,AT2G44980,AT3G03110,AT3G13330,AT3G26820,AT3G20760,AT4G05523,AT5G03470,AT3G09880,AT2G41500,AT2G47420,AT2G32980,AT2G34890,AT2G47030,AT2G46740,AT2G46760,AT2G31040,AT5G18070,AT1G07890,AT3G19150,AT1G13120,AT2G46980,AT4G20320,AT3G09640,AT2G26650,AT5G27870,AT2G45180,AT1G08130,AT4G19560,AT5G61270,AT3G21060…	F1C9.19,T10M13.13,MEE6.20,F14J9.10,SYLC_ARATH,F13F21.31,BARD1,T17H7.12,Y14,F14M13.7,CHR10,XPO1B,PA200,F4JDQ6_ARATH,NSE4B,F4JGH3_ARATH,B'ALPHA,B'BETA,LIS,DIM1A,AUG2,F19I3.12,PME4,GULLO5,GULLO6,CGL160,DRT101,APX1,KRP6,GLE1,ASY3,F1C12.230,APX2,AKT1,PME28,F4L23.31,LIG1,CYCT1-2,BHLH72,RBL-2,VGDH2,PME5,KRP1-2,GULLO2,EBF2,PME13,F25P12.84,PIF5,T7P1.14,PME21,PME23,AKT6,KRP4,CYCT1-4,ATX5,EMF2,CYCT1-3,T28N1…	3.03e-07	3.01e-05	Cellular process
Process	GO:0032786	5	33	3702	AT4G19560,AT4G19600,AT1G27630,AT1G35440,AT5G45190	CYCT1-2,CYCT1-4,CYCT1-3,CYCT1-1,CYCT1-5	1.74e-06	0.00014	Positive regulation of DNA-templated transcription, elongation
Process	GO:0006541	5	40	3702	AT4G02120,AT1G30820,AT2G34890,AT4G20320,AT3G12670	T10M13.13,T17H7.12,F19I3.12,F1C12.230,T2E22.2	4.11e-06	0.0003	Glutamine metabolic process
Process	GO:0019752	18	966	3702	AT4G02120,AT1G09620,AT1G30820,AT2G34890,AT2G46740,AT2G46760,AT4G20320,AT2G46750,AT4G15415,AT1G08630,AT1G32300,AT5G56490,AT5G56470,AT3G04520,AT3G12670,AT5G10160,AT5G11540,AT2G22230	T10M13.13,SYLC_ARATH,T17H7.12,F19I3.12,GULLO5,GULLO6,F1C12.230,GULLO2,B'GAMMA,THA1,GULLO1,GULLO4,GULLO7,THA2,T2E22.2,T31P16.150,GULLO3,T26C19.11	5.29e-06	0.00036	Carboxylic acid metabolic process
Process	GO:0031062	4	19	3702	AT5G53430,AT3G61740,AT4G27910,AT5G66750	ATX5,ATX3,ATX4,DDM1	6.31e-06	0.00043	Positive regulation of histone methylation
Process	GO:0044249	34	2858	3702	AT3G02030,AT4G02120,AT5G41130,AT1G09620,AT1G49250,AT1G30820,AT2G22530,AT3G26820,AT2G34890,AT2G46740,AT2G46760,AT5G18070,AT1G07890,AT4G20320,AT1G08130,AT2G46750,AT3G59060,AT4G19210,AT4G15415,AT1G08630,AT1G32300,AT5G49180,AT5G41120,AT5G56490,AT5G56470,AT3G04520,AT3G13640,AT3G12670,AT3G26840,AT5G10160,AT5G11540,AT4G30300,AT2G22230,AT1G54570	F1C9.19,T10M13.13,MEE6.20,SYLC_ARATH,F13F21.31,T17H7.12,F14M13.7,F4JDQ6_ARATH,F19I3.12,GULLO5,GULLO6,DRT101,APX1,F1C12.230,LIG1,GULLO2,PIF5,ABCE2,B'GAMMA,THA1,GULLO1,PME58,MEE6.19,GULLO4,GULLO7,THA2,ABCE1,T2E22.2,PES2,T31P16.150,GULLO3,ABCE3,T26C19.11,PES1	7.01e-06	0.00045	Cellular biosynthetic process
Process	GO:0005996	8	179	3702	AT2G46740,AT2G46760,AT2G46750,AT5G12960,AT1G32300,AT5G56490,AT5G56470,AT5G11540	GULLO5,GULLO6,GULLO2,T24H18.130,GULLO1,GULLO4,GULLO7,GULLO3	7.62e-06	0.00049	Monosaccharide metabolic process
Process	GO:0009893	17	909	3702	AT1G04020,AT1G51510,AT3G13330,AT4G19560,AT2G23430,AT1G60995,AT4G19600,AT5G53430,AT1G27630,AT1G13460,AT4G21070,AT1G35440,AT5G45190,AT3G24810,AT3G61740,AT4G27910,AT5G66750	BARD1,Y14,PA200,CYCT1-2,KRP1-2,T7P1.14,CYCT1-4,ATX5,CYCT1-3,B'THETA,BRCA1,CYCT1-1,CYCT1-5,KRP5,ATX3,ATX4,DDM1	9.4e-06	0.00059	Positive regulation of metabolic process
Process	GO:0019216	6	85	3702	AT1G04020,AT1G60995,AT1G13460,AT4G21070,AT3G26840,AT1G54570	BARD1,T7P1.14,B'THETA,BRCA1,PES2,PES1	9.45e-06	0.00059	Regulation of lipid metabolic process
Process	GO:0010604	16	827	3702	AT1G04020,AT1G51510,AT3G13330,AT4G19560,AT2G23430,AT1G60995,AT4G19600,AT5G53430,AT1G27630,AT4G21070,AT1G35440,AT5G45190,AT3G24810,AT3G61740,AT4G27910,AT5G66750	BARD1,Y14,PA200,CYCT1-2,KRP1-2,T7P1.14,CYCT1-4,ATX5,CYCT1-3,BRCA1,CYCT1-1,CYCT1-5,KRP5,ATX3,ATX4,DDM1	1.16e-05	0.00071	Positive regulation of macromolecule metabolic process
Process	GO:0051571	3	6	3702	AT5G53430,AT3G61740,AT4G27910	ATX5,ATX3,ATX4	1.21e-05	0.00074	Positive regulation of histone H3-K4 methylation
Process	GO:1901576	34	2952	3702	AT3G02030,AT4G02120,AT5G41130,AT1G09620,AT1G49250,AT1G30820,AT2G22530,AT3G26820,AT2G34890,AT2G46740,AT2G46760,AT5G18070,AT1G07890,AT4G20320,AT1G08130,AT2G46750,AT3G59060,AT4G19210,AT4G15415,AT1G08630,AT1G32300,AT5G49180,AT5G41120,AT5G56490,AT5G56470,AT3G04520,AT3G13640,AT3G12670,AT3G26840,AT5G10160,AT5G11540,AT4G30300,AT2G22230,AT1G54570	F1C9.19,T10M13.13,MEE6.20,SYLC_ARATH,F13F21.31,T17H7.12,F14M13.7,F4JDQ6_ARATH,F19I3.12,GULLO5,GULLO6,DRT101,APX1,F1C12.230,LIG1,GULLO2,PIF5,ABCE2,B'GAMMA,THA1,GULLO1,PME58,MEE6.19,GULLO4,GULLO7,THA2,ABCE1,T2E22.2,PES2,T31P16.150,GULLO3,ABCE3,T26C19.11,PES1	1.39e-05	0.00083	Organic substance biosynthetic process
Process	GO:0016051	10	334	3702	AT2G46740,AT2G46760,AT2G46750,AT1G32300,AT5G49180,AT5G56490,AT5G56470,AT5G10160,AT5G11540,AT2G22230	GULLO5,GULLO6,GULLO2,GULLO1,PME58,GULLO4,GULLO7,T31P16.150,GULLO3,T26C19.11	1.66e-05	0.00098	Carbohydrate biosynthetic process
Process	GO:0018130	16	859	3702	AT4G02120,AT1G49250,AT1G30820,AT2G34890,AT2G46740,AT2G46760,AT5G18070,AT4G20320,AT1G08130,AT2G46750,AT4G15415,AT1G32300,AT5G56490,AT5G56470,AT3G12670,AT5G11540	T10M13.13,F13F21.31,T17H7.12,F19I3.12,GULLO5,GULLO6,DRT101,F1C12.230,LIG1,GULLO2,B'GAMMA,GULLO1,GULLO4,GULLO7,T2E22.2,GULLO3	1.84e-05	0.0011	Heterocycle biosynthetic process
Process	GO:0071704	74	9277	3702	AT3G02030,AT4G02120,AT5G41130,AT1G09440,AT1G09620,AT1G49250,AT1G04020,AT1G30820,AT1G51510,AT2G22530,AT3G13330,AT3G48070,AT3G26820,AT3G20760,AT4G05523,AT2G41500,AT2G47420,AT2G34890,AT2G47030,AT2G46740,AT2G46760,AT5G18070,AT1G07890,AT1G13120,AT4G20320,AT5G27870,AT1G08130,AT3G21060,AT3G62170,AT2G47040,AT2G46750,AT5G25350,AT2G26450,AT1G56720,AT3G59060,AT5G12960,AT3G05610,AT3G06830,AT5G53430,AT5G18500…	F1C9.19,T10M13.13,MEE6.20,F14J9.10,SYLC_ARATH,F13F21.31,BARD1,T17H7.12,Y14,F14M13.7,PA200,F4JCT1_ARATH,F4JDQ6_ARATH,NSE4B,F4JGH3_ARATH,LIS,DIM1A,F19I3.12,PME4,GULLO5,GULLO6,DRT101,APX1,GLE1,F1C12.230,PME28,LIG1,RBL-2,VGDH2,PME5,GULLO2,EBF2,PME13,F25P12.84,PIF5,T24H18.130,PME21,PME23,ATX5,T28N17.1,ABCE2,B'GAMMA,BRCA1,THA1,SNRNP35,F7F22.4,GULLO1,NSE4A,PME58,MEE6.19,MQB2.23,GULLO4,GULLO7,THA2,ABCE1,…	2.7e-05	0.0015	Organic substance metabolic process
Process	GO:0035067	3	9	3702	AT1G04020,AT4G21070,AT5G66750	BARD1,BRCA1,DDM1	3.14e-05	0.0018	Negative regulation of histone acetylation
Process	GO:0051173	15	805	3702	AT1G04020,AT3G13330,AT4G19560,AT2G23430,AT1G60995,AT4G19600,AT5G53430,AT1G27630,AT4G21070,AT1G35440,AT5G45190,AT3G24810,AT3G61740,AT4G27910,AT5G66750	BARD1,PA200,CYCT1-2,KRP1-2,T7P1.14,CYCT1-4,ATX5,CYCT1-3,BRCA1,CYCT1-1,CYCT1-5,KRP5,ATX3,ATX4,DDM1	3.39e-05	0.0018	Positive regulation of nitrogen compound metabolic process
Process	GO:0046890	5	67	3702	AT1G04020,AT1G60995,AT4G21070,AT3G26840,AT1G54570	BARD1,T7P1.14,BRCA1,PES2,PES1	4.2e-05	0.0022	Regulation of lipid biosynthetic process
Process	GO:0051028	5	75	3702	AT1G51510,AT3G03110,AT4G05523,AT1G13120,AT5G17020	Y14,XPO1B,F4JGH3_ARATH,GLE1,XPO1	6.97e-05	0.0035	mRNA transport
Process	GO:1901362	17	1071	3702	AT4G02120,AT1G49250,AT1G30820,AT2G34890,AT2G46740,AT2G46760,AT5G18070,AT1G07890,AT4G20320,AT1G08130,AT2G46750,AT4G15415,AT1G32300,AT5G56490,AT5G56470,AT3G12670,AT5G11540	T10M13.13,F13F21.31,T17H7.12,F19I3.12,GULLO5,GULLO6,DRT101,APX1,F1C12.230,LIG1,GULLO2,B'GAMMA,GULLO1,GULLO4,GULLO7,T2E22.2,GULLO3	7.15e-05	0.0035	Organic cyclic compound biosynthetic process
Process	GO:0046394	11	486	3702	AT2G46740,AT2G46760,AT2G46750,AT1G08630,AT1G32300,AT5G56490,AT5G56470,AT3G04520,AT5G10160,AT5G11540,AT2G22230	GULLO5,GULLO6,GULLO2,THA1,GULLO1,GULLO4,GULLO7,THA2,T31P16.150,GULLO3,T26C19.11	7.56e-05	0.0037	Carboxylic acid biosynthetic process
Process	GO:0006349	3	13	3702	AT5G51230,AT4G16845,AT5G66750	EMF2,VRN2,DDM1	7.87e-05	0.0038	Regulation of gene expression by genomic imprinting
Process	GO:0043085	6	126	3702	AT3G13330,AT4G19560,AT4G19600,AT1G27630,AT1G35440,AT5G45190	PA200,CYCT1-2,CYCT1-4,CYCT1-3,CYCT1-1,CYCT1-5	7.76e-05	0.0038	Positive regulation of catalytic activity
Process	GO:0009742	5	81	3702	AT5G03470,AT3G09880,AT1G13460,AT4G15415,AT3G21650	B'ALPHA,B'BETA,B'THETA,B'GAMMA,B'ZETA	9.84e-05	0.0047	Brassinosteroid mediated signaling pathway
Process	GO:0006415	3	15	3702	AT4G19210,AT3G13640,AT4G30300	ABCE2,ABCE1,ABCE3	0.00011	0.0052	Translational termination
Process	GO:0044281	22	1705	3702	AT4G02120,AT1G09620,AT1G30820,AT2G34890,AT2G46740,AT2G46760,AT5G18070,AT4G20320,AT2G46750,AT5G12960,AT4G15415,AT1G08630,AT1G32300,AT5G56490,AT5G56470,AT3G04520,AT3G12670,AT3G26840,AT5G10160,AT5G11540,AT2G22230,AT1G54570	T10M13.13,SYLC_ARATH,T17H7.12,F19I3.12,GULLO5,GULLO6,DRT101,F1C12.230,GULLO2,T24H18.130,B'GAMMA,THA1,GULLO1,GULLO4,GULLO7,THA2,T2E22.2,PES2,T31P16.150,GULLO3,T26C19.11,PES1	0.00012	0.0054	Small molecule metabolic process
Process	GO:0009553	6	143	3702	AT3G03110,AT5G03470,AT3G09880,AT2G41500,AT5G52820,AT5G17020	XPO1B,B'ALPHA,B'BETA,LIS,NLE1,XPO1	0.00015	0.0063	Embryo sac development
Process	GO:0031325	14	830	3702	AT1G04020,AT4G19560,AT2G23430,AT4G19600,AT5G53430,AT1G27630,AT1G13460,AT4G21070,AT1G35440,AT5G45190,AT3G24810,AT3G61740,AT4G27910,AT5G66750	BARD1,CYCT1-2,KRP1-2,CYCT1-4,ATX5,CYCT1-3,B'THETA,BRCA1,CYCT1-1,CYCT1-5,KRP5,ATX3,ATX4,DDM1	0.00017	0.0072	Positive regulation of cellular metabolic process
Process	GO:0016571	5	93	3702	AT1G04020,AT3G21060,AT5G53430,AT3G61740,AT4G27910	BARD1,RBL-2,ATX5,ATX3,ATX4	0.00018	0.0074	Histone methylation
Process	GO:1901137	10	466	3702	AT4G02120,AT1G30820,AT2G22530,AT2G34890,AT5G18070,AT4G20320,AT4G15415,AT3G12670,AT5G10160,AT2G22230	T10M13.13,T17H7.12,F14M13.7,F19I3.12,DRT101,F1C12.230,B'GAMMA,T2E22.2,T31P16.150,T26C19.11	0.00024	0.0099	Carbohydrate derivative biosynthetic process
Process	GO:0006567	2	3	3702	AT1G08630,AT3G04520	THA1,THA2	0.00028	0.0112	Threonine catabolic process
Process	GO:0010866	2	3	3702	AT3G26840,AT1G54570	PES2,PES1	0.00028	0.0112	Regulation of triglyceride biosynthetic process
Process	GO:0033306	2	3	3702	AT3G26840,AT1G54570	PES2,PES1	0.00028	0.0112	Phytol metabolic process
Process	GO:0051301	9	388	3702	AT2G47420,AT2G32980,AT1G08130,AT4G19560,AT4G19600,AT1G27630,AT1G35440,AT5G48600,AT5G45190	DIM1A,AUG2,LIG1,CYCT1-2,CYCT1-4,CYCT1-3,CYCT1-1,SMC4,CYCT1-5	0.00029	0.0114	Cell division
Process	GO:1901605	8	306	3702	AT4G02120,AT1G30820,AT2G34890,AT4G20320,AT4G15415,AT1G08630,AT3G04520,AT3G12670	T10M13.13,T17H7.12,F19I3.12,F1C12.230,B'GAMMA,THA1,THA2,T2E22.2	0.00029	0.0114	Alpha-amino acid metabolic process
Process	GO:0048518	18	1335	3702	AT1G04020,AT1G51510,AT3G13330,AT2G45180,AT4G19560,AT2G23430,AT1G60995,AT4G19600,AT5G53430,AT1G27630,AT1G13460,AT4G21070,AT1G35440,AT5G45190,AT3G24810,AT3G61740,AT4G27910,AT5G66750	BARD1,Y14,PA200,F4L23.31,CYCT1-2,KRP1-2,T7P1.14,CYCT1-4,ATX5,CYCT1-3,B'THETA,BRCA1,CYCT1-1,CYCT1-5,KRP5,ATX3,ATX4,DDM1	0.00032	0.0125	Positive regulation of biological process
Process	GO:0048519	17	1233	3702	AT1G04020,AT1G51510,AT3G19150,AT2G23430,AT5G25350,AT2G32710,AT5G51230,AT1G13460,AT4G15415,AT4G21070,AT1G49620,AT5G48820,AT4G36930,AT3G24810,AT3G21650,AT2G25490,AT5G66750	BARD1,Y14,KRP6,KRP1-2,EBF2,KRP4,EMF2,B'THETA,B'GAMMA,BRCA1,KRP7,KRP3,SPT,KRP5,B'ZETA,EBF1,DDM1	0.00037	0.0143	Negative regulation of biological process
Process	GO:0080090	33	3346	3702	AT1G04020,AT1G51510,AT3G13330,AT4G05523,AT3G19150,AT1G13120,AT4G19560,AT5G61270,AT1G68240,AT2G23430,AT3G59060,AT1G60995,AT2G32710,AT4G19600,AT5G53430,AT5G51230,AT1G27630,AT1G13460,AT4G21070,AT2G43010,AT4G16845,AT1G49620,AT1G35440,AT5G67110,AT5G48820,AT5G45190,AT4G36930,AT3G24810,AT3G26840,AT3G61740,AT4G27910,AT5G66750,AT1G54570	BARD1,Y14,PA200,F4JGH3_ARATH,KRP6,GLE1,CYCT1-2,BHLH72,BHLH109,KRP1-2,PIF5,T7P1.14,KRP4,CYCT1-4,ATX5,EMF2,CYCT1-3,B'THETA,BRCA1,PIF4,VRN2,KRP7,CYCT1-1,ALC,KRP3,CYCT1-5,SPT,KRP5,PES2,ATX3,ATX4,DDM1,PES1	0.00037	0.0143	Regulation of primary metabolic process
Process	GO:0008152	75	10167	3702	AT3G02030,AT4G02120,AT5G41130,AT1G09440,AT1G09620,AT1G49250,AT1G04020,AT1G30820,AT1G51510,AT2G22530,AT3G13330,AT3G48070,AT3G26820,AT3G20760,AT4G05523,AT2G41500,AT2G47420,AT2G34890,AT2G47030,AT2G46740,AT2G46760,AT5G18070,AT1G07890,AT1G13120,AT4G20320,AT3G09640,AT5G27870,AT1G08130,AT3G21060,AT3G62170,AT2G47040,AT2G46750,AT5G25350,AT2G26450,AT1G56720,AT3G59060,AT5G12960,AT3G05610,AT3G06830,AT5G53430…	F1C9.19,T10M13.13,MEE6.20,F14J9.10,SYLC_ARATH,F13F21.31,BARD1,T17H7.12,Y14,F14M13.7,PA200,F4JCT1_ARATH,F4JDQ6_ARATH,NSE4B,F4JGH3_ARATH,LIS,DIM1A,F19I3.12,PME4,GULLO5,GULLO6,DRT101,APX1,GLE1,F1C12.230,APX2,PME28,LIG1,RBL-2,VGDH2,PME5,GULLO2,EBF2,PME13,F25P12.84,PIF5,T24H18.130,PME21,PME23,ATX5,T28N17.1,ABCE2,B'GAMMA,BRCA1,THA1,SNRNP35,F7F22.4,GULLO1,NSE4A,PME58,MEE6.19,MQB2.23,GULLO4,GULLO7,THA2,A…	0.00038	0.0147	Metabolic process
Process	GO:0044238	66	8604	3702	AT4G02120,AT1G09440,AT1G09620,AT1G49250,AT1G04020,AT1G30820,AT1G51510,AT2G22530,AT3G13330,AT3G48070,AT3G20760,AT2G41500,AT2G47420,AT2G34890,AT2G47030,AT2G46740,AT2G46760,AT5G18070,AT4G20320,AT5G27870,AT1G08130,AT3G21060,AT3G62170,AT2G47040,AT2G46750,AT5G25350,AT2G26450,AT1G56720,AT5G12960,AT3G05610,AT3G06830,AT5G53430,AT5G18500,AT4G19210,AT4G15415,AT4G21070,AT1G08630,AT2G43370,AT1G42440,AT1G32300…	T10M13.13,F14J9.10,SYLC_ARATH,F13F21.31,BARD1,T17H7.12,Y14,F14M13.7,PA200,F4JCT1_ARATH,NSE4B,LIS,DIM1A,F19I3.12,PME4,GULLO5,GULLO6,DRT101,F1C12.230,PME28,LIG1,RBL-2,VGDH2,PME5,GULLO2,EBF2,PME13,F25P12.84,T24H18.130,PME21,PME23,ATX5,T28N17.1,ABCE2,B'GAMMA,BRCA1,THA1,SNRNP35,F7F22.4,GULLO1,NSE4A,PME58,MQB2.23,GULLO4,GULLO7,THA2,ABCE1,GPK1,T2E22.2,BGLU44,BGLU43,PES2,T31P16.150,T24H18.120,GULLO3,F17J…	0.0004	0.0151	Primary metabolic process
Process	GO:0045717	2	4	3702	AT1G04020,AT4G21070	BARD1,BRCA1	0.00042	0.0157	Negative regulation of fatty acid biosynthetic process
Process	GO:1904963	2	4	3702	AT3G26840,AT1G54570	PES2,PES1	0.00042	0.0157	Regulation of phytol biosynthetic process
Process	GO:0031323	33	3384	3702	AT1G04020,AT1G51510,AT4G05523,AT5G03470,AT3G19150,AT1G13120,AT4G19560,AT5G61270,AT1G68240,AT2G23430,AT3G59060,AT2G32710,AT4G19600,AT5G53430,AT5G51230,AT1G27630,AT1G13460,AT4G15415,AT4G21070,AT2G43010,AT4G16845,AT1G49620,AT1G35440,AT5G67110,AT5G48820,AT5G45190,AT4G36930,AT3G24810,AT3G26840,AT3G61740,AT4G27910,AT5G66750,AT1G54570	BARD1,Y14,F4JGH3_ARATH,B'ALPHA,KRP6,GLE1,CYCT1-2,BHLH72,BHLH109,KRP1-2,PIF5,KRP4,CYCT1-4,ATX5,EMF2,CYCT1-3,B'THETA,B'GAMMA,BRCA1,PIF4,VRN2,KRP7,CYCT1-1,ALC,KRP3,CYCT1-5,SPT,KRP5,PES2,ATX3,ATX4,DDM1,PES1	0.00046	0.0168	Regulation of cellular metabolic process
Process	GO:0019217	3	26	3702	AT1G04020,AT1G13460,AT4G21070	BARD1,B'THETA,BRCA1	0.00049	0.0178	Regulation of fatty acid metabolic process
Process	GO:0065007	54	6689	3702	AT1G09620,AT1G04020,AT1G51510,AT3G13330,AT4G05523,AT5G03470,AT3G09880,AT2G47030,AT3G19150,AT1G13120,AT2G46980,AT2G26650,AT5G27870,AT2G45180,AT4G19560,AT5G61270,AT3G62170,AT2G47040,AT1G68240,AT2G23430,AT5G25350,AT2G26450,AT3G59060,AT1G60995,AT3G05610,AT3G06830,AT2G25600,AT2G32710,AT4G19600,AT5G53430,AT5G51230,AT1G27630,AT1G13460,AT4G15415,AT4G21070,AT2G43010,AT4G16845,AT1G49620,AT1G35440,AT5G67110…	SYLC_ARATH,BARD1,Y14,PA200,F4JGH3_ARATH,B'ALPHA,B'BETA,PME4,KRP6,GLE1,ASY3,AKT1,PME28,F4L23.31,CYCT1-2,BHLH72,VGDH2,PME5,BHLH109,KRP1-2,EBF2,PME13,PIF5,T7P1.14,PME21,PME23,AKT6,KRP4,CYCT1-4,ATX5,EMF2,CYCT1-3,B'THETA,B'GAMMA,BRCA1,PIF4,VRN2,KRP7,CYCT1-1,ALC,PME58,KRP3,CYCT1-5,SPT,KRP5,B'ZETA,PES2,ATX3,AKT5,EBF1,PME45,ATX4,DDM1,PES1	0.00057	0.0207	Biological regulation
Process	GO:0000056	2	5	3702	AT3G03110,AT5G17020	XPO1B,XPO1	0.00058	0.0209	Ribosomal small subunit export from nucleus
Process	GO:0006273	2	5	3702	AT1G49250,AT1G08130	F13F21.31,LIG1	0.00058	0.0209	Lagging strand elongation
Process	GO:0006520	9	430	3702	AT4G02120,AT1G09620,AT1G30820,AT2G34890,AT4G20320,AT4G15415,AT1G08630,AT3G04520,AT3G12670	T10M13.13,SYLC_ARATH,T17H7.12,F19I3.12,F1C12.230,B'GAMMA,THA1,THA2,T2E22.2	0.0006	0.0209	Cellular amino acid metabolic process
Process	GO:0062012	5	121	3702	AT1G04020,AT1G13460,AT4G21070,AT3G26840,AT1G54570	BARD1,B'THETA,BRCA1,PES2,PES1	0.00058	0.0209	Regulation of small molecule metabolic process
Process	GO:0019222	35	3735	3702	AT1G04020,AT1G51510,AT3G13330,AT4G05523,AT5G03470,AT3G19150,AT1G13120,AT4G19560,AT5G61270,AT1G68240,AT2G23430,AT3G59060,AT1G60995,AT2G32710,AT4G19600,AT5G53430,AT5G51230,AT1G27630,AT1G13460,AT4G15415,AT4G21070,AT2G43010,AT4G16845,AT1G49620,AT1G35440,AT5G67110,AT5G48820,AT5G45190,AT4G36930,AT3G24810,AT3G26840,AT3G61740,AT4G27910,AT5G66750,AT1G54570	BARD1,Y14,PA200,F4JGH3_ARATH,B'ALPHA,KRP6,GLE1,CYCT1-2,BHLH72,BHLH109,KRP1-2,PIF5,T7P1.14,KRP4,CYCT1-4,ATX5,EMF2,CYCT1-3,B'THETA,B'GAMMA,BRCA1,PIF4,VRN2,KRP7,CYCT1-1,ALC,KRP3,CYCT1-5,SPT,KRP5,PES2,ATX3,ATX4,DDM1,PES1	0.00061	0.0213	Regulation of metabolic process
Process	GO:0006310	6	188	3702	AT1G49250,AT1G04020,AT3G20760,AT1G08130,AT4G21070,AT1G51130	F13F21.31,BARD1,NSE4B,LIG1,BRCA1,NSE4A	0.00062	0.0214	DNA recombination
Process	GO:0032501	27	2594	3702	AT1G09620,AT1G04020,AT3G03110,AT5G03470,AT3G09880,AT2G41500,AT1G07890,AT1G13120,AT2G26650,AT5G61270,AT3G21060,AT2G47040,AT1G68240,AT2G23430,AT5G51230,AT4G15415,AT2G43010,AT5G67110,AT5G49180,AT5G48600,AT5G52820,AT4G36930,AT3G12670,AT3G26840,AT4G12550,AT5G17020,AT1G54570	SYLC_ARATH,BARD1,XPO1B,B'ALPHA,B'BETA,LIS,APX1,GLE1,AKT1,BHLH72,RBL-2,PME5,BHLH109,KRP1-2,EMF2,B'GAMMA,PIF4,ALC,PME58,SMC4,NLE1,SPT,T2E22.2,PES2,AIR1,XPO1,PES1	0.00063	0.0216	Multicellular organismal process
Process	GO:0048522	15	1072	3702	AT1G04020,AT4G19560,AT2G23430,AT1G60995,AT4G19600,AT5G53430,AT1G27630,AT1G13460,AT4G21070,AT1G35440,AT5G45190,AT3G24810,AT3G61740,AT4G27910,AT5G66750	BARD1,CYCT1-2,KRP1-2,T7P1.14,CYCT1-4,ATX5,CYCT1-3,B'THETA,BRCA1,CYCT1-1,CYCT1-5,KRP5,ATX3,ATX4,DDM1	0.00071	0.0243	Positive regulation of cellular process
Process	GO:0007275	25	2344	3702	AT1G09620,AT1G04020,AT3G03110,AT5G03470,AT3G09880,AT2G41500,AT1G07890,AT1G13120,AT2G26650,AT5G61270,AT3G21060,AT1G68240,AT2G23430,AT5G51230,AT4G15415,AT2G43010,AT5G49180,AT5G48600,AT5G52820,AT4G36930,AT3G12670,AT3G26840,AT4G12550,AT5G17020,AT1G54570	SYLC_ARATH,BARD1,XPO1B,B'ALPHA,B'BETA,LIS,APX1,GLE1,AKT1,BHLH72,RBL-2,BHLH109,KRP1-2,EMF2,B'GAMMA,PIF4,PME58,SMC4,NLE1,SPT,T2E22.2,PES2,AIR1,XPO1,PES1	0.00073	0.0247	Multicellular organism development
Process	GO:0006449	2	6	3702	AT4G05523,AT1G13120	F4JGH3_ARATH,GLE1	0.00077	0.0259	Regulation of translational termination
Process	GO:0035066	2	6	3702	AT1G04020,AT4G21070	BARD1,BRCA1	0.00077	0.0259	Positive regulation of histone acetylation
Process	GO:0051276	10	545	3702	AT2G44980,AT5G03470,AT3G09880,AT5G53430,AT5G51230,AT4G16845,AT5G48600,AT3G61740,AT4G27910,AT5G66750	CHR10,B'ALPHA,B'BETA,ATX5,EMF2,VRN2,SMC4,ATX3,ATX4,DDM1	0.00081	0.0263	Chromosome organization
Process	GO:0048523	12	767	3702	AT1G04020,AT3G19150,AT2G23430,AT5G25350,AT2G32710,AT1G13460,AT4G21070,AT1G49620,AT5G48820,AT3G24810,AT3G21650,AT2G25490	BARD1,KRP6,KRP1-2,EBF2,KRP4,B'THETA,BRCA1,KRP7,KRP3,KRP5,B'ZETA,EBF1	0.00097	0.0315	Negative regulation of cellular process
Process	GO:0006266	2	7	3702	AT1G49250,AT1G08130	F13F21.31,LIG1	0.00099	0.0318	DNA ligation
Process	GO:0045740	2	7	3702	AT2G23430,AT3G24810	KRP1-2,KRP5	0.00099	0.0318	Positive regulation of DNA replication
Process	GO:1900458	2	7	3702	AT1G13460,AT3G21650	B'THETA,B'ZETA	0.00099	0.0318	Negative regulation of brassinosteroid mediated signaling pathway
Process	GO:0003006	17	1363	3702	AT1G09620,AT3G03110,AT5G03470,AT3G09880,AT2G41500,AT1G07890,AT1G13120,AT3G21060,AT2G47040,AT1G68240,AT5G51230,AT4G15415,AT5G49180,AT5G48600,AT4G36930,AT3G12670,AT5G17020	SYLC_ARATH,XPO1B,B'ALPHA,B'BETA,LIS,APX1,GLE1,RBL-2,PME5,BHLH109,EMF2,B'GAMMA,PME58,SMC4,SPT,T2E22.2,XPO1	0.0011	0.0344	Developmental process involved in reproduction
Process	GO:0000055	2	8	3702	AT3G03110,AT5G17020	XPO1B,XPO1	0.0012	0.0377	Ribosomal large subunit export from nucleus
Process	GO:0010244	2	8	3702	AT3G59060,AT2G43010	PIF5,PIF4	0.0012	0.0377	Response to low fluence blue light stimulus by blue low-fluence system
Process	GO:0022414	19	1630	3702	AT1G09620,AT3G03110,AT5G03470,AT3G09880,AT2G41500,AT1G07890,AT1G13120,AT2G46980,AT3G21060,AT2G47040,AT1G68240,AT5G51230,AT4G15415,AT5G67110,AT5G49180,AT5G48600,AT4G36930,AT3G12670,AT5G17020	SYLC_ARATH,XPO1B,B'ALPHA,B'BETA,LIS,APX1,GLE1,ASY3,RBL-2,PME5,BHLH109,EMF2,B'GAMMA,ALC,PME58,SMC4,SPT,T2E22.2,XPO1	0.0012	0.0377	Reproductive process
Process	GO:0006281	8	387	3702	AT1G49250,AT1G04020,AT3G13330,AT3G20760,AT5G18070,AT1G08130,AT4G21070,AT1G51130	F13F21.31,BARD1,PA200,NSE4B,DRT101,LIG1,BRCA1,NSE4A	0.0013	0.0391	DNA repair
Process	GO:0048856	27	2728	3702	AT1G09620,AT1G04020,AT3G03110,AT5G03470,AT3G09880,AT2G41500,AT1G07890,AT1G13120,AT2G26650,AT5G61270,AT3G21060,AT2G47040,AT1G68240,AT2G23430,AT4G19600,AT5G51230,AT4G15415,AT2G43010,AT5G49180,AT5G48600,AT5G52820,AT4G36930,AT3G12670,AT3G26840,AT4G12550,AT5G17020,AT1G54570	SYLC_ARATH,BARD1,XPO1B,B'ALPHA,B'BETA,LIS,APX1,GLE1,AKT1,BHLH72,RBL-2,PME5,BHLH109,KRP1-2,CYCT1-4,EMF2,B'GAMMA,PIF4,PME58,SMC4,NLE1,SPT,T2E22.2,PES2,AIR1,XPO1,PES1	0.0013	0.0398	Anatomical structure development
Process	GO:0032502	28	2875	3702	AT1G09620,AT1G04020,AT3G03110,AT5G03470,AT3G09880,AT2G41500,AT2G47420,AT1G07890,AT1G13120,AT2G26650,AT5G61270,AT3G21060,AT2G47040,AT1G68240,AT2G23430,AT4G19600,AT5G51230,AT4G15415,AT2G43010,AT5G49180,AT5G48600,AT5G52820,AT4G36930,AT3G12670,AT3G26840,AT4G12550,AT5G17020,AT1G54570	SYLC_ARATH,BARD1,XPO1B,B'ALPHA,B'BETA,LIS,DIM1A,APX1,GLE1,AKT1,BHLH72,RBL-2,PME5,BHLH109,KRP1-2,CYCT1-4,EMF2,B'GAMMA,PIF4,PME58,SMC4,NLE1,SPT,T2E22.2,PES2,AIR1,XPO1,PES1	0.0014	0.0406	Developmental process
Process	GO:0071840	30	3168	3702	AT1G04020,AT2G44980,AT3G03110,AT5G03470,AT3G09880,AT2G47420,AT2G32980,AT2G47030,AT2G31040,AT5G27870,AT3G62170,AT2G47040,AT2G26450,AT3G05610,AT3G06830,AT5G53430,AT5G51230,AT4G19210,AT4G16845,AT1G42440,AT5G49180,AT5G48600,AT5G52820,AT3G13640,AT4G30300,AT3G61740,AT5G17020,AT4G33230,AT4G27910,AT5G66750	BARD1,CHR10,XPO1B,B'ALPHA,B'BETA,DIM1A,AUG2,PME4,CGL160,PME28,VGDH2,PME5,PME13,PME21,PME23,ATX5,EMF2,ABCE2,VRN2,F7F22.4,PME58,SMC4,NLE1,ABCE1,ABCE3,ATX3,XPO1,PME45,ATX4,DDM1	0.0014	0.0411	Cellular component organization or biogenesis
Process	GO:0006446	2	9	3702	AT4G05523,AT1G13120	F4JGH3_ARATH,GLE1	0.0015	0.0437	Regulation of translational initiation
Process	GO:0006611	2	9	3702	AT3G03110,AT5G17020	XPO1B,XPO1	0.0015	0.0437	Protein export from nucleus
Process	GO:0046483	28	2907	3702	AT4G02120,AT1G09620,AT1G49250,AT1G04020,AT1G30820,AT1G51510,AT3G13330,AT3G20760,AT2G41500,AT2G47420,AT2G34890,AT2G46740,AT2G46760,AT5G18070,AT4G20320,AT1G08130,AT2G46750,AT4G15415,AT4G21070,AT2G43370,AT1G42440,AT1G32300,AT1G51130,AT5G56490,AT5G56470,AT3G12670,AT5G11540,AT2G05720	T10M13.13,SYLC_ARATH,F13F21.31,BARD1,T17H7.12,Y14,PA200,NSE4B,LIS,DIM1A,F19I3.12,GULLO5,GULLO6,DRT101,F1C12.230,LIG1,GULLO2,B'GAMMA,BRCA1,SNRNP35,F7F22.4,GULLO1,NSE4A,GULLO4,GULLO7,T2E22.2,GULLO3,T3P4.4	0.0016	0.0461	Heterocycle metabolic process
Component	GO:0005654	21	493	3702	AT1G76940,AT1G21320,AT1G51510,AT2G41500,AT3G19150,AT4G19560,AT5G61270,AT3G21060,AT2G23430,AT2G32710,AT4G19600,AT5G53430,AT1G27630,AT2G43370,AT1G49620,AT1G35440,AT5G48820,AT5G45190,AT3G24810,AT3G61740,AT4G27910	NSRA,NSRB,Y14,LIS,KRP6,CYCT1-2,BHLH72,RBL-2,KRP1-2,KRP4,CYCT1-4,ATX5,CYCT1-3,SNRNP35,KRP7,CYCT1-1,KRP3,CYCT1-5,KRP5,ATX3,ATX4	5.06e-13	5.09e-10	Nucleoplasm
Component	GO:0031981	26	1028	3702	AT1G76940,AT1G21320,AT1G51510,AT2G41500,AT2G47420,AT3G19150,AT2G46980,AT1G08130,AT4G19560,AT5G61270,AT3G21060,AT2G23430,AT2G32710,AT4G19600,AT5G53430,AT1G27630,AT2G43370,AT1G49620,AT1G42440,AT1G35440,AT5G48820,AT5G45190,AT5G52820,AT3G24810,AT3G61740,AT4G27910	NSRA,NSRB,Y14,LIS,DIM1A,KRP6,ASY3,LIG1,CYCT1-2,BHLH72,RBL-2,KRP1-2,KRP4,CYCT1-4,ATX5,CYCT1-3,SNRNP35,KRP7,F7F22.4,CYCT1-1,KRP3,CYCT1-5,NLE1,KRP5,ATX3,ATX4	6.34e-11	3.19e-08	Nuclear lumen
Component	GO:0008024	5	5	3702	AT4G19560,AT4G19600,AT1G27630,AT1G35440,AT5G45190	CYCT1-2,CYCT1-4,CYCT1-3,CYCT1-1,CYCT1-5	9.86e-10	3.31e-07	cyclin/CDK positive transcription elongation factor complex
Component	GO:1902494	23	1222	3702	AT1G04020,AT3G13330,AT3G20760,AT5G03470,AT3G09880,AT4G19560,AT3G21060,AT5G25350,AT4G19600,AT5G53430,AT1G27630,AT1G13460,AT4G15415,AT4G21070,AT1G51130,AT1G35440,AT5G45190,AT5G52820,AT3G21650,AT3G61740,AT2G05720,AT2G25490,AT4G27910	BARD1,PA200,NSE4B,B'ALPHA,B'BETA,CYCT1-2,RBL-2,EBF2,CYCT1-4,ATX5,CYCT1-3,B'THETA,B'GAMMA,BRCA1,NSE4A,CYCT1-1,CYCT1-5,NLE1,B'ZETA,ATX3,T3P4.4,EBF1,ATX4	1.9e-07	2.12e-05	Catalytic complex
Component	GO:0140513	20	947	3702	AT1G04020,AT1G51510,AT3G03110,AT4G05523,AT2G41500,AT1G13120,AT4G19560,AT3G21060,AT4G19600,AT5G53430,AT1G27630,AT4G21070,AT2G43370,AT4G16845,AT1G35440,AT5G45190,AT3G61740,AT2G05720,AT5G17020,AT4G27910	BARD1,Y14,XPO1B,F4JGH3_ARATH,LIS,GLE1,CYCT1-2,RBL-2,CYCT1-4,ATX5,CYCT1-3,BRCA1,SNRNP35,VRN2,CYCT1-1,CYCT1-5,ATX3,T3P4.4,XPO1,ATX4	2.24e-07	2.25e-05	Nuclear protein-containing complex
Component	GO:1990234	17	702	3702	AT1G04020,AT3G20760,AT4G19560,AT3G21060,AT5G25350,AT4G19600,AT5G53430,AT1G27630,AT4G21070,AT1G51130,AT1G35440,AT5G45190,AT5G52820,AT3G61740,AT2G05720,AT2G25490,AT4G27910	BARD1,NSE4B,CYCT1-2,RBL-2,EBF2,CYCT1-4,ATX5,CYCT1-3,BRCA1,NSE4A,CYCT1-1,CYCT1-5,NLE1,ATX3,T3P4.4,EBF1,ATX4	3.11e-07	2.84e-05	Transferase complex
Component	GO:0000159	5	23	3702	AT5G03470,AT3G09880,AT1G13460,AT4G15415,AT3G21650	B'ALPHA,B'BETA,B'THETA,B'GAMMA,B'ZETA	3.56e-07	2.98e-05	Protein phosphatase type 2A complex
Component	GO:0048188	4	15	3702	AT3G21060,AT5G53430,AT3G61740,AT4G27910	RBL-2,ATX5,ATX3,ATX4	2.81e-06	0.00017	Set1C/COMPASS complex
Component	GO:0016607	6	94	3702	AT1G76940,AT1G21320,AT1G51510,AT2G41500,AT5G61270,AT2G43370	NSRA,NSRB,Y14,LIS,BHLH72,SNRNP35	1.62e-05	0.00091	Nuclear speck
Component	GO:0005634	55	6070	3702	AT5G03960,AT1G76940,AT4G16810,AT1G21320,AT1G49250,AT1G04020,AT1G51510,AT2G44980,AT3G03110,AT3G13330,AT3G20760,AT4G05523,AT5G03470,AT3G09880,AT2G41500,AT2G47420,AT3G19150,AT1G13120,AT2G46980,AT1G08130,AT4G19560,AT5G61270,AT3G21060,AT1G68240,AT2G23430,AT5G25350,AT3G59060,AT2G32710,AT4G19600,AT5G53430,AT5G51230,AT1G27630,AT4G15415,AT4G21070,AT2G43370,AT2G43010,AT4G16845,AT1G49620,AT1G42440,AT1G51130…	IQD12,NSRA,Dl4430c,NSRB,F13F21.31,BARD1,Y14,CHR10,XPO1B,PA200,NSE4B,F4JGH3_ARATH,B'ALPHA,B'BETA,LIS,DIM1A,KRP6,GLE1,ASY3,LIG1,CYCT1-2,BHLH72,RBL-2,BHLH109,KRP1-2,EBF2,PIF5,KRP4,CYCT1-4,ATX5,EMF2,CYCT1-3,B'GAMMA,BRCA1,SNRNP35,PIF4,VRN2,KRP7,F7F22.4,NSE4A,CYCT1-1,ALC,SMC4,KRP3,CYCT1-5,NLE1,SPT,KRP5,IQD11,ATX3,T3P4.4,EBF1,XPO1,ATX4,DDM1	1.96e-05	0.001	Nucleus
Component	GO:0032991	35	3222	3702	AT1G04020,AT1G51510,AT3G03110,AT3G13330,AT3G48070,AT3G20760,AT4G05523,AT5G03470,AT3G09880,AT2G41500,AT1G13120,AT4G19560,AT3G21060,AT5G25350,AT4G19600,AT5G53430,AT1G27630,AT1G13460,AT4G15415,AT4G21070,AT2G43370,AT4G16845,AT1G42440,AT1G51130,AT1G35440,AT5G45190,AT5G52820,AT5G62910,AT3G21650,AT3G61740,AT2G05720,AT2G25490,AT5G17020,AT4G27910,AT5G66750	BARD1,Y14,XPO1B,PA200,F4JCT1_ARATH,NSE4B,F4JGH3_ARATH,B'ALPHA,B'BETA,LIS,GLE1,CYCT1-2,RBL-2,EBF2,CYCT1-4,ATX5,CYCT1-3,B'THETA,B'GAMMA,BRCA1,SNRNP35,VRN2,F7F22.4,NSE4A,CYCT1-1,CYCT1-5,NLE1,MQB2.23,B'ZETA,ATX3,T3P4.4,EBF1,XPO1,ATX4,DDM1	3.44e-05	0.0016	Protein-containing complex
Component	GO:0140535	14	716	3702	AT1G04020,AT3G13330,AT3G48070,AT5G03470,AT3G09880,AT5G25350,AT1G13460,AT4G15415,AT4G21070,AT5G52820,AT5G62910,AT3G21650,AT2G05720,AT2G25490	BARD1,PA200,F4JCT1_ARATH,B'ALPHA,B'BETA,EBF2,B'THETA,B'GAMMA,BRCA1,NLE1,MQB2.23,B'ZETA,T3P4.4,EBF1	3.77e-05	0.0016	Intracellular protein-containing complex
Component	GO:0110165	124	19483	3702	AT5G03960,AT1G76940,AT4G16810,AT1G21320,AT1G35420,AT1G09440,AT1G09620,AT1G49250,AT1G04020,AT1G30820,AT1G51510,AT2G22530,AT2G44980,AT3G03110,AT3G13330,AT3G20760,AT4G05523,AT5G03470,AT3G09880,AT2G41500,AT2G47420,AT2G32980,AT2G34890,AT2G47030,AT2G46740,AT2G46760,AT2G31040,AT5G18070,AT1G07890,AT3G19150,AT1G13120,AT2G46980,AT4G20320,AT3G09640,AT2G26650,AT4G12480,AT5G27870,AT2G45180,AT1G08130,AT4G27620…	IQD12,NSRA,Dl4430c,NSRB,F12A4.4,F14J9.10,SYLC_ARATH,F13F21.31,BARD1,T17H7.12,Y14,F14M13.7,CHR10,XPO1B,PA200,NSE4B,F4JGH3_ARATH,B'ALPHA,B'BETA,LIS,DIM1A,AUG2,F19I3.12,PME4,GULLO5,GULLO6,CGL160,DRT101,APX1,KRP6,GLE1,ASY3,F1C12.230,APX2,AKT1,EARLI1,PME28,F4L23.31,LIG1,T29A15.110,CYCT1-2,BHLH72,RBL-2,VGDH2,PME5,BHLH109,KRP1-2,AT1G19710,GULLO2,EBF2,PME13,AT1G75420,F25P12.84,T29A15.100,PIF5,T7P1.14,PME…	0.00012	0.0045	Cellular anatomical entity
Component	GO:0031436	2	2	3702	AT1G04020,AT4G21070	BARD1,BRCA1	0.00017	0.0058	BRCA1-BARD1 complex
Component	GO:0097268	2	2	3702	AT2G34890,AT4G20320	F19I3.12,F1C12.230	0.00017	0.0058	Cytoophidium
Component	GO:0009506	14	842	3702	AT1G09620,AT3G03110,AT2G47030,AT5G18070,AT1G07890,AT4G12480,AT5G53430,AT3G17420,AT3G59110,AT4G12520,AT2G10940,AT4G12530,AT4G12490,AT4G12470	SYLC_ARATH,XPO1B,PME4,DRT101,APX1,EARLI1,ATX5,GPK1,F17J16_160,T1P17.100,F15K19.1,T1P17.120,T1P17.80,AZI1	0.0002	0.0065	Plasmodesma
Component	GO:0001673	2	3	3702	AT3G19150,AT1G49620	KRP6,KRP7	0.00028	0.0077	Male germ cell nucleus
Component	GO:0005622	98	14335	3702	AT5G03960,AT1G76940,AT4G16810,AT1G21320,AT1G35420,AT1G09620,AT1G49250,AT1G04020,AT1G30820,AT1G51510,AT2G22530,AT2G44980,AT3G03110,AT3G13330,AT3G20760,AT4G05523,AT5G03470,AT3G09880,AT2G41500,AT2G47420,AT2G32980,AT2G34890,AT2G31040,AT5G18070,AT1G07890,AT3G19150,AT1G13120,AT2G46980,AT4G20320,AT3G09640,AT4G12480,AT2G45180,AT1G08130,AT4G19560,AT5G61270,AT3G21060,AT2G47040,AT1G68240,AT2G23430,AT1G19710…	IQD12,NSRA,Dl4430c,NSRB,F12A4.4,SYLC_ARATH,F13F21.31,BARD1,T17H7.12,Y14,F14M13.7,CHR10,XPO1B,PA200,NSE4B,F4JGH3_ARATH,B'ALPHA,B'BETA,LIS,DIM1A,AUG2,F19I3.12,CGL160,DRT101,APX1,KRP6,GLE1,ASY3,F1C12.230,APX2,EARLI1,F4L23.31,LIG1,CYCT1-2,BHLH72,RBL-2,PME5,BHLH109,KRP1-2,AT1G19710,EBF2,AT1G75420,PIF5,T7P1.14,KRP4,CYCT1-4,ATX5,EMF2,CYCT1-3,B'THETA,ABCE2,B'GAMMA,BRCA1,THA1,SNRNP35,PIF4,PTC52,VRN2,RH22,…	0.00028	0.0077	Intracellular anatomical structure
Component	GO:0005643	4	55	3702	AT3G03110,AT4G05523,AT1G13120,AT5G17020	XPO1B,F4JGH3_ARATH,GLE1,XPO1	0.00028	0.0077	Nuclear pore
Component	GO:0043231	87	12391	3702	AT5G03960,AT1G76940,AT4G16810,AT1G21320,AT1G35420,AT1G09620,AT1G49250,AT1G04020,AT1G51510,AT2G22530,AT2G44980,AT3G03110,AT3G13330,AT3G20760,AT4G05523,AT5G03470,AT3G09880,AT2G41500,AT2G47420,AT2G31040,AT5G18070,AT1G07890,AT3G19150,AT1G13120,AT2G46980,AT3G09640,AT4G12480,AT2G45180,AT1G08130,AT4G19560,AT5G61270,AT3G21060,AT2G47040,AT1G68240,AT2G23430,AT1G19710,AT5G25350,AT1G75420,AT3G59060,AT1G60995…	IQD12,NSRA,Dl4430c,NSRB,F12A4.4,SYLC_ARATH,F13F21.31,BARD1,Y14,F14M13.7,CHR10,XPO1B,PA200,NSE4B,F4JGH3_ARATH,B'ALPHA,B'BETA,LIS,DIM1A,CGL160,DRT101,APX1,KRP6,GLE1,ASY3,APX2,EARLI1,F4L23.31,LIG1,CYCT1-2,BHLH72,RBL-2,PME5,BHLH109,KRP1-2,AT1G19710,EBF2,AT1G75420,PIF5,T7P1.14,KRP4,CYCT1-4,ATX5,EMF2,CYCT1-3,B'THETA,B'GAMMA,BRCA1,SNRNP35,PIF4,PTC52,VRN2,RH22,KRP7,F7F22.4,NSE4A,CYCT1-1,ALC,SMC4,KRP3,CYC…	0.00044	0.0114	Intracellular membrane-bounded organelle
Component	GO:0043229	89	12866	3702	AT5G03960,AT1G76940,AT4G16810,AT1G21320,AT1G35420,AT1G09620,AT1G49250,AT1G04020,AT1G51510,AT2G22530,AT2G44980,AT3G03110,AT3G13330,AT3G20760,AT4G05523,AT5G03470,AT3G09880,AT2G41500,AT2G47420,AT2G32980,AT2G31040,AT5G18070,AT1G07890,AT3G19150,AT1G13120,AT2G46980,AT3G09640,AT4G12480,AT2G45180,AT1G08130,AT4G19560,AT5G61270,AT3G21060,AT2G47040,AT1G68240,AT2G23430,AT1G19710,AT5G25350,AT1G75420,AT3G59060…	IQD12,NSRA,Dl4430c,NSRB,F12A4.4,SYLC_ARATH,F13F21.31,BARD1,Y14,F14M13.7,CHR10,XPO1B,PA200,NSE4B,F4JGH3_ARATH,B'ALPHA,B'BETA,LIS,DIM1A,AUG2,CGL160,DRT101,APX1,KRP6,GLE1,ASY3,APX2,EARLI1,F4L23.31,LIG1,CYCT1-2,BHLH72,RBL-2,PME5,BHLH109,KRP1-2,AT1G19710,EBF2,AT1G75420,PIF5,T7P1.14,KRP4,CYCT1-4,ATX5,EMF2,CYCT1-3,B'THETA,B'GAMMA,BRCA1,SNRNP35,PIF4,PTC52,VRN2,RH22,KRP7,F7F22.4,NSE4A,CYCT1-1,ALC,SMC4,KRP…	0.0006	0.0143	Intracellular organelle
Component	GO:0044614	2	5	3702	AT4G05523,AT1G13120	F4JGH3_ARATH,GLE1	0.00058	0.0143	Nuclear pore cytoplasmic filaments
Component	GO:0070531	2	7	3702	AT1G04020,AT4G21070	BARD1,BRCA1	0.00099	0.0221	BRCA1-A complex
Component	GO:0030915	2	8	3702	AT3G20760,AT1G51130	NSE4B,NSE4A	0.0012	0.0267	Smc5-Smc6 complex
Component	GO:0090406	4	83	3702	AT2G47030,AT3G62170,AT2G47040,AT3G06830	PME4,VGDH2,PME5,PME23	0.0012	0.0267	Pollen tube
Component	GO:0005694	8	406	3702	AT2G44980,AT3G20760,AT2G46980,AT5G53430,AT1G51130,AT5G48600,AT4G27910,AT5G66750	CHR10,NSE4B,ASY3,ATX5,NSE4A,SMC4,ATX4,DDM1	0.0017	0.0358	Chromosome
Function	GO:0030234	26	547	3702	AT3G13330,AT5G03470,AT3G09880,AT2G47030,AT3G19150,AT5G27870,AT4G19560,AT3G62170,AT2G47040,AT2G23430,AT2G26450,AT3G05610,AT3G06830,AT2G32710,AT4G19600,AT1G27630,AT1G13460,AT4G15415,AT1G49620,AT1G35440,AT5G49180,AT5G48820,AT5G45190,AT3G24810,AT3G21650,AT4G33230	PA200,B'ALPHA,B'BETA,PME4,KRP6,PME28,CYCT1-2,VGDH2,PME5,KRP1-2,PME13,PME21,PME23,KRP4,CYCT1-4,CYCT1-3,B'THETA,B'GAMMA,KRP7,CYCT1-1,PME58,KRP3,CYCT1-5,KRP5,B'ZETA,PME45	5.12e-17	1.64e-13	Enzyme regulator activity
Function	GO:0016538	11	52	3702	AT3G19150,AT4G19560,AT2G23430,AT2G32710,AT4G19600,AT1G27630,AT1G49620,AT1G35440,AT5G48820,AT5G45190,AT3G24810	KRP6,CYCT1-2,KRP1-2,KRP4,CYCT1-4,CYCT1-3,KRP7,CYCT1-1,KRP3,CYCT1-5,KRP5	3.24e-14	3.45e-11	Cyclin-dependent protein serine/threonine kinase regulator activity
Function	GO:0050105	7	7	3702	AT2G46740,AT2G46760,AT2G46750,AT1G32300,AT5G56490,AT5G56470,AT5G11540	GULLO5,GULLO6,GULLO2,GULLO1,GULLO4,GULLO7,GULLO3	3.49e-13	2.79e-10	L-gulonolactone oxidase activity
Function	GO:0003885	7	8	3702	AT2G46740,AT2G46760,AT2G46750,AT1G32300,AT5G56490,AT5G56470,AT5G11540	GULLO5,GULLO6,GULLO2,GULLO1,GULLO4,GULLO7,GULLO3	6.52e-13	4.17e-10	D-arabinono-1,4-lactone oxidase activity
Function	GO:0004857	15	240	3702	AT2G47030,AT3G19150,AT5G27870,AT3G62170,AT2G47040,AT2G23430,AT2G26450,AT3G05610,AT3G06830,AT2G32710,AT1G49620,AT5G49180,AT5G48820,AT3G24810,AT4G33230	PME4,KRP6,PME28,VGDH2,PME5,KRP1-2,PME13,PME21,PME23,KRP4,KRP7,PME58,KRP3,KRP5,PME45	8.03e-12	4.28e-09	Enzyme inhibitor activity
Function	GO:0004861	6	8	3702	AT3G19150,AT2G23430,AT2G32710,AT1G49620,AT5G48820,AT3G24810	KRP6,KRP1-2,KRP4,KRP7,KRP3,KRP5	5.96e-11	2.26e-08	Cyclin-dependent protein serine/threonine kinase inhibitor activity
Function	GO:0045330	9	67	3702	AT2G47030,AT5G27870,AT3G62170,AT2G47040,AT2G26450,AT3G05610,AT3G06830,AT5G49180,AT4G33230	PME4,PME28,VGDH2,PME5,PME13,PME21,PME23,PME58,PME45	2.83e-10	7.52e-08	Aspartyl esterase activity
Function	GO:0003883	5	5	3702	AT4G02120,AT1G30820,AT2G34890,AT4G20320,AT3G12670	T10M13.13,T17H7.12,F19I3.12,F1C12.230,T2E22.2	9.86e-10	2.42e-07	CTP synthase activity
Function	GO:0061575	5	7	3702	AT4G19560,AT4G19600,AT1G27630,AT1G35440,AT5G45190	CYCT1-2,CYCT1-4,CYCT1-3,CYCT1-1,CYCT1-5	3.07e-09	7.01e-07	Cyclin-dependent protein serine/threonine kinase activator activity
Function	GO:0030599	9	91	3702	AT2G47030,AT5G27870,AT3G62170,AT2G47040,AT2G26450,AT3G05610,AT3G06830,AT5G49180,AT4G33230	PME4,PME28,VGDH2,PME5,PME13,PME21,PME23,PME58,PME45	3.39e-09	7.21e-07	Pectinesterase activity
Function	GO:0046910	9	92	3702	AT2G47030,AT5G27870,AT3G62170,AT2G47040,AT2G26450,AT3G05610,AT3G06830,AT5G49180,AT4G33230	PME4,PME28,VGDH2,PME5,PME13,PME21,PME23,PME58,PME45	3.7e-09	7.39e-07	Pectinesterase inhibitor activity
Function	GO:0004144	6	21	3702	AT3G02030,AT5G41130,AT3G26820,AT5G41120,AT3G26840,AT1G54570	F1C9.19,MEE6.20,F4JDQ6_ARATH,MEE6.19,PES2,PES1	5.55e-09	1.04e-06	Diacylglycerol O-acyltransferase activity
Function	GO:0052689	10	234	3702	AT1G09620,AT2G47030,AT5G27870,AT3G62170,AT2G47040,AT2G26450,AT3G05610,AT3G06830,AT5G49180,AT4G33230	SYLC_ARATH,PME4,PME28,VGDH2,PME5,PME13,PME21,PME23,PME58,PME45	7.96e-07	0.00012	Carboxylic ester hydrolase activity
Function	GO:0071949	6	81	3702	AT2G46740,AT2G46760,AT2G46750,AT1G32300,AT5G56490,AT5G11540	GULLO5,GULLO6,GULLO2,GULLO1,GULLO4,GULLO3	7.28e-06	0.00093	FAD binding
Function	GO:0016874	10	305	3702	AT4G02120,AT1G09620,AT1G49250,AT1G30820,AT2G34890,AT4G20320,AT1G08130,AT5G12960,AT3G12670,AT5G12950	T10M13.13,SYLC_ARATH,F13F21.31,T17H7.12,F19I3.12,F1C12.230,LIG1,T24H18.130,T2E22.2,T24H18.120	7.76e-06	0.00095	Ligase activity
Function	GO:0019888	5	57	3702	AT5G03470,AT3G09880,AT1G13460,AT4G15415,AT3G21650	B'ALPHA,B'BETA,B'THETA,B'GAMMA,B'ZETA	2.03e-05	0.0024	Protein phosphatase regulator activity
Function	GO:0043024	3	9	3702	AT4G19210,AT3G13640,AT4G30300	ABCE2,ABCE1,ABCE3	3.14e-05	0.0035	Ribosomal small subunit binding
Function	GO:0003682	7	196	3702	AT4G16810,AT2G44980,AT3G59060,AT5G51230,AT2G43010,AT4G16845,AT3G24810	Dl4430c,CHR10,PIF5,EMF2,PIF4,VRN2,KRP5	0.00011	0.0112	Chromatin binding
Function	GO:0031490	4	43	3702	AT4G16810,AT5G51230,AT4G16845,AT3G24810	Dl4430c,EMF2,VRN2,KRP5	0.00012	0.0112	Chromatin DNA binding
Function	GO:0004317	2	2	3702	AT5G10160,AT2G22230	T31P16.150,T26C19.11	0.00017	0.0158	3-hydroxypalmitoyl-[acyl-carrier-protein] dehydratase activity
Function	GO:0008659	2	2	3702	AT5G10160,AT2G22230	T31P16.150,T26C19.11	0.00017	0.0158	(3R)-hydroxymyristoyl-[acyl-carrier-protein] dehydratase activity
Function	GO:0008693	2	2	3702	AT5G10160,AT2G22230	T31P16.150,T26C19.11	0.00017	0.0158	3-hydroxydecanoyl-[acyl-carrier-protein] dehydratase activity
Function	GO:0008732	2	2	3702	AT1G08630,AT3G04520	THA1,THA2	0.00017	0.0158	L-allo-threonine aldolase activity
Function	GO:0030621	2	2	3702	AT2G41500,AT2G05720	LIS,T3P4.4	0.00017	0.0158	U4 snRNA binding
Function	GO:0047451	2	2	3702	AT5G10160,AT2G22230	T31P16.150,T26C19.11	0.00017	0.0158	3-hydroxyoctanoyl-[acyl-carrier-protein] dehydratase activity
Function	GO:0008047	6	156	3702	AT3G13330,AT4G19560,AT4G19600,AT1G27630,AT1G35440,AT5G45190	PA200,CYCT1-2,CYCT1-4,CYCT1-3,CYCT1-1,CYCT1-5	0.00024	0.0181	Enzyme activator activity
Function	GO:0005249	3	21	3702	AT2G26650,AT2G25600,AT4G32500	AKT1,AKT6,AKT5	0.00028	0.0205	Voltage-gated potassium channel activity
Function	GO:0017069	3	25	3702	AT2G41500,AT2G43370,AT2G05720	LIS,SNRNP35,T3P4.4	0.00044	0.0299	snRNA binding
Function	GO:0016747	8	335	3702	AT3G02030,AT5G41130,AT3G26820,AT5G41120,AT3G26840,AT5G10160,AT2G22230,AT1G54570	F1C9.19,MEE6.20,F4JDQ6_ARATH,MEE6.19,PES2,T31P16.150,T26C19.11,PES1	0.00052	0.0341	Acyltransferase activity, transferring groups other than amino-acyl groups
Function	GO:0003910	2	5	3702	AT1G49250,AT1G08130	F13F21.31,LIG1	0.00058	0.0371	DNA ligase (ATP) activity
Keyword	KW-0060	7	14	3702	AT2G46740,AT2G46760,AT2G46750,AT1G32300,AT5G56490,AT5G56470,AT5G11540	GULLO5,GULLO6,GULLO2,GULLO1,GULLO4,GULLO7,GULLO3	1.15e-11	5.35e-09	Ascorbate biosynthesis
Keyword	KW-0063	9	68	3702	AT2G47030,AT5G27870,AT3G62170,AT2G47040,AT2G26450,AT3G05610,AT3G06830,AT5G49180,AT4G33230	PME4,PME28,VGDH2,PME5,PME13,PME21,PME23,PME58,PME45	3.18e-10	7.42e-08	Aspartyl esterase
Keyword	KW-0131	14	268	3702	AT2G32980,AT3G19150,AT1G08130,AT4G19560,AT2G23430,AT2G32710,AT4G19600,AT1G27630,AT1G49620,AT1G35440,AT5G48600,AT5G48820,AT5G45190,AT3G24810	AUG2,KRP6,LIG1,CYCT1-2,KRP1-2,KRP4,CYCT1-4,CYCT1-3,KRP7,CYCT1-1,SMC4,KRP3,CYCT1-5,KRP5	3.86e-10	7.42e-08	Cell cycle
Keyword	KW-0649	6	24	3702	AT3G19150,AT2G23430,AT2G32710,AT1G49620,AT5G48820,AT3G24810	KRP6,KRP1-2,KRP4,KRP7,KRP3,KRP5	1.1e-08	1.28e-06	Protein kinase inhibitor
Keyword	KW-0665	5	14	3702	AT4G02120,AT1G30820,AT2G34890,AT4G20320,AT3G12670	T10M13.13,T17H7.12,F19I3.12,F1C12.230,T2E22.2	4.38e-08	4.08e-06	Pyrimidine biosynthesis
Keyword	KW-0315	5	27	3702	AT4G02120,AT1G30820,AT2G34890,AT4G20320,AT3G12670	T10M13.13,T17H7.12,F19I3.12,F1C12.230,T2E22.2	7.17e-07	5.57e-05	Glutamine amidotransferase
Keyword	KW-0436	10	244	3702	AT4G02120,AT1G09620,AT1G49250,AT1G30820,AT2G34890,AT4G20320,AT1G08130,AT5G12960,AT3G12670,AT5G12950	T10M13.13,SYLC_ARATH,F13F21.31,T17H7.12,F19I3.12,F1C12.230,LIG1,T24H18.130,T2E22.2,T24H18.120	1.15e-06	7.63e-05	Ligase
Keyword	KW-0234	8	155	3702	AT1G49250,AT1G04020,AT3G13330,AT3G20760,AT5G18070,AT1G08130,AT4G21070,AT1G51130	F13F21.31,BARD1,PA200,NSE4B,DRT101,LIG1,BRCA1,NSE4A	2.76e-06	0.00016	DNA repair
Keyword	KW-0539	42	3817	3702	AT1G76940,AT1G21320,AT1G04020,AT1G51510,AT2G44980,AT3G03110,AT3G20760,AT5G03470,AT3G09880,AT2G41500,AT2G47420,AT3G19150,AT1G13120,AT2G46980,AT1G08130,AT5G61270,AT3G21060,AT1G68240,AT2G23430,AT5G25350,AT3G59060,AT2G32710,AT5G53430,AT5G51230,AT4G15415,AT4G21070,AT2G43370,AT2G43010,AT4G16845,AT1G49620,AT1G51130,AT5G67110,AT5G48600,AT5G48820,AT5G52820,AT4G36930,AT3G24810,AT3G61740,AT2G25490,AT5G17020…	NSRA,NSRB,BARD1,Y14,CHR10,XPO1B,NSE4B,B'ALPHA,B'BETA,LIS,DIM1A,KRP6,GLE1,ASY3,LIG1,BHLH72,RBL-2,BHLH109,KRP1-2,EBF2,PIF5,KRP4,ATX5,EMF2,B'GAMMA,BRCA1,SNRNP35,PIF4,VRN2,KRP7,NSE4A,ALC,SMC4,KRP3,NLE1,SPT,KRP5,ATX3,EBF1,XPO1,ATX4,DDM1	3.03e-06	0.00016	Nucleus
Keyword	KW-1070	5	47	3702	AT5G03470,AT3G09880,AT1G13460,AT4G15415,AT3G21650	B'ALPHA,B'BETA,B'THETA,B'GAMMA,B'ZETA	8.49e-06	0.00036	Brassinosteroid signaling pathway
Keyword	KW-0195	5	52	3702	AT4G19560,AT4G19600,AT1G27630,AT1G35440,AT5G45190	CYCT1-2,CYCT1-4,CYCT1-3,CYCT1-1,CYCT1-5	1.34e-05	0.00052	Cyclin
Keyword	KW-0132	8	198	3702	AT2G32980,AT1G08130,AT4G19560,AT4G19600,AT1G27630,AT1G35440,AT5G48600,AT5G45190	AUG2,LIG1,CYCT1-2,CYCT1-4,CYCT1-3,CYCT1-1,SMC4,CYCT1-5	1.54e-05	0.00055	Cell division
Keyword	KW-0134	9	261	3702	AT2G47030,AT4G12480,AT3G62170,AT2G47040,AT3G06830,AT5G49180,AT4G12500,AT4G12490,AT4G12470	PME4,EARLI1,VGDH2,PME5,PME23,PME58,T1P17.90,T1P17.80,AZI1	1.52e-05	0.00055	Cell wall
Keyword	KW-0732	37	3670	3702	AT3G22120,AT1G12100,AT3G26820,AT1G12090,AT2G47030,AT2G46740,AT2G46760,AT5G46900,AT4G12480,AT2G45180,AT3G62170,AT2G47040,AT2G46750,AT5G12960,AT3G06830,AT4G00165,AT1G32300,AT5G49180,AT5G46890,AT5G56490,AT3G17420,AT3G18080,AT3G18070,AT5G12950,AT5G11540,AT4G12550,AT4G12520,AT2G10940,AT4G12530,AT4G12500,AT4G12490,AT4G12470,AT4G22490,AT4G22460,AT1G62510,AT1G62500,AT4G12545	CWLP,F12F1.2,F4JDQ6_ARATH,ELP,PME4,GULLO5,GULLO6,extA,EARLI1,F4L23.31,VGDH2,PME5,GULLO2,T24H18.130,PME23,F6N15.21,GULLO1,PME58,MQD22.2,GULLO4,GPK1,BGLU44,BGLU43,T24H18.120,GULLO3,AIR1,T1P17.100,F15K19.1,T1P17.120,T1P17.90,T1P17.80,AZI1,F7K2.70,F7K2.40,T3P18.7,T3P18.6,AIR1B	9.44e-05	0.0029	Signal
Keyword	KW-0631	3	16	3702	AT2G26650,AT2G25600,AT4G32500	AKT1,AKT6,AKT5	0.00013	0.0039	Potassium channel
Keyword	KW-0630	5	94	3702	AT1G07890,AT3G09640,AT2G26650,AT2G25600,AT4G32500	APX1,APX2,AKT1,AKT6,AKT5	0.00019	0.0052	Potassium
Keyword	KW-0851	3	19	3702	AT2G26650,AT2G25600,AT4G32500	AKT1,AKT6,AKT5	0.00021	0.0055	Voltage-gated channel
Keyword	KW-0509	4	60	3702	AT1G51510,AT3G03110,AT1G13120,AT5G17020	Y14,XPO1B,GLE1,XPO1	0.00038	0.0094	mRNA transport
Keyword	KW-0233	4	65	3702	AT1G49250,AT3G20760,AT1G08130,AT1G51130	F13F21.31,NSE4B,LIG1,NSE4A	0.00051	0.0119	DNA recombination
Keyword	KW-0274	6	205	3702	AT2G46740,AT2G46760,AT2G46750,AT1G32300,AT5G56490,AT5G11540	GULLO5,GULLO6,GULLO2,GULLO1,GULLO4,GULLO3	0.00096	0.0213	FAD
Keyword	KW-0906	3	34	3702	AT3G03110,AT1G13120,AT5G17020	XPO1B,GLE1,XPO1	0.001	0.0213	Nuclear pore complex
Keyword	KW-0607	3	45	3702	AT5G61270,AT3G59060,AT2G43010	BHLH72,PIF5,PIF4	0.0021	0.0417	Phytochrome signaling pathway
KEGG	ath00053	9	54	3702	AT2G46740,AT2G46760,AT1G07890,AT3G09640,AT2G46750,AT1G32300,AT5G56490,AT5G56470,AT5G11540	GULLO5,GULLO6,APX1,APX2,GULLO2,GULLO1,GULLO4,GULLO7,GULLO3	4.98e-11	6.72e-09	Ascorbate and aldarate metabolism
KEGG	ath03015	7	114	3702	AT1G51510,AT5G03470,AT3G09880,AT1G13120,AT1G13460,AT4G15415,AT3G21650	Y14,B'ALPHA,B'BETA,GLE1,B'THETA,B'GAMMA,B'ZETA	4e-06	0.00027	mRNA surveillance pathway
KEGG	ath00240	5	60	3702	AT4G02120,AT1G30820,AT2G34890,AT4G20320,AT3G12670	T10M13.13,T17H7.12,F19I3.12,F1C12.230,T2E22.2	2.55e-05	0.0011	Pyrimidine metabolism
KEGG	ath01100	26	2285	3702	AT4G02120,AT1G30820,AT2G34890,AT2G47030,AT2G46740,AT2G46760,AT5G18070,AT1G07890,AT4G20320,AT3G09640,AT5G27870,AT2G46750,AT3G05610,AT3G06830,AT1G08630,AT1G32300,AT5G49180,AT5G56490,AT5G56470,AT3G04520,AT3G12670,AT3G18080,AT3G18070,AT5G10160,AT5G11540,AT2G22230	T10M13.13,T17H7.12,F19I3.12,PME4,GULLO5,GULLO6,DRT101,APX1,F1C12.230,APX2,PME28,GULLO2,PME21,PME23,THA1,GULLO1,PME58,GULLO4,GULLO7,THA2,T2E22.2,BGLU44,BGLU43,T31P16.150,GULLO3,T26C19.11	0.00021	0.0071	Metabolic pathways
KEGG	ath00040	5	105	3702	AT2G47030,AT5G27870,AT3G05610,AT3G06830,AT5G49180	PME4,PME28,PME21,PME23,PME58	0.00031	0.0084	Pentose and glucuronate interconversions
SMART	SM00499	20	109	3702	AT3G22120,AT1G12100,AT1G12090,AT5G46900,AT4G12480,AT2G45180,AT4G00165,AT5G46890,AT4G12550,AT4G12520,AT2G10940,AT4G12530,AT4G12500,AT4G12490,AT4G12470,AT4G22490,AT4G22460,AT1G62510,AT1G62500,AT4G12545	CWLP,F12F1.2,ELP,extA,EARLI1,F4L23.31,F6N15.21,MQD22.2,AIR1,T1P17.100,F15K19.1,T1P17.120,T1P17.90,T1P17.80,AZI1,F7K2.70,F7K2.40,T3P18.7,T3P18.6,AIR1B	7.64e-24	4.23e-21	Plant lipid transfer protein / seed storage protein / trypsin-alpha amylase inhibitor domain family
SMART	SM00856	9	114	3702	AT2G47030,AT5G27870,AT3G62170,AT2G47040,AT2G26450,AT3G05610,AT3G06830,AT5G49180,AT4G33230	PME4,PME28,VGDH2,PME5,PME13,PME21,PME23,PME58,PME45	2.11e-08	5.84e-06	Plant invertase/pectin methylesterase inhibitor
SMART	SM00563	5	26	3702	AT3G02030,AT5G41130,AT3G26820,AT5G41120,AT3G26840	F1C9.19,MEE6.20,F4JDQ6_ARATH,MEE6.19,PES2	6.07e-07	0.00011	Phosphate acyltransferases
SMART	SM00385	5	59	3702	AT4G19560,AT4G19600,AT1G27630,AT1G35440,AT5G45190	CYCT1-2,CYCT1-4,CYCT1-3,CYCT1-1,CYCT1-5	2.37e-05	0.0033	Domain present in cyclins, TFIIB and Retinoblastoma
SMART	SM01102	2	2	3702	AT3G03110,AT5G17020	XPO1B,XPO1	0.00017	0.0186	CRM1 C terminal
SMART	SM00353	6	156	3702	AT5G61270,AT1G68240,AT3G59060,AT2G43010,AT5G67110,AT4G36930	BHLH72,BHLH109,PIF5,PIF4,ALC,SPT	0.00024	0.0219	Helix loop helix domain
SMART	SM00508	3	20	3702	AT5G53430,AT3G61740,AT4G27910	ATX5,ATX3,ATX4	0.00024	0.0219	Cysteine-rich motif following a subset of SET domains
InterPro	IPR027923	20	28	3702	AT3G22120,AT1G12100,AT1G12090,AT5G46900,AT4G12480,AT2G45180,AT4G00165,AT5G46890,AT4G12550,AT4G12520,AT2G10940,AT4G12530,AT4G12500,AT4G12490,AT4G12470,AT4G22490,AT4G22460,AT1G62510,AT1G62500,AT4G12545	CWLP,F12F1.2,ELP,extA,EARLI1,F4L23.31,F6N15.21,MQD22.2,AIR1,T1P17.100,F15K19.1,T1P17.120,T1P17.90,T1P17.80,AZI1,F7K2.70,F7K2.40,T3P18.7,T3P18.6,AIR1B	1.29e-33	8.17e-30	Hydrophobic seed protein domain
InterPro	IPR016140	20	116	3702	AT3G22120,AT1G12100,AT1G12090,AT5G46900,AT4G12480,AT2G45180,AT4G00165,AT5G46890,AT4G12550,AT4G12520,AT2G10940,AT4G12530,AT4G12500,AT4G12490,AT4G12470,AT4G22490,AT4G22460,AT1G62510,AT1G62500,AT4G12545	CWLP,F12F1.2,ELP,extA,EARLI1,F4L23.31,F6N15.21,MQD22.2,AIR1,T1P17.100,F15K19.1,T1P17.120,T1P17.90,T1P17.80,AZI1,F7K2.70,F7K2.40,T3P18.7,T3P18.6,AIR1B	2.32e-23	7.34e-20	Bifunctional inhibitor/plant lipid transfer protein/seed storage helical domain
InterPro	IPR036312	20	125	3702	AT3G22120,AT1G12100,AT1G12090,AT5G46900,AT4G12480,AT2G45180,AT4G00165,AT5G46890,AT4G12550,AT4G12520,AT2G10940,AT4G12530,AT4G12500,AT4G12490,AT4G12470,AT4G22490,AT4G22460,AT1G62510,AT1G62500,AT4G12545	CWLP,F12F1.2,ELP,extA,EARLI1,F4L23.31,F6N15.21,MQD22.2,AIR1,T1P17.100,F15K19.1,T1P17.120,T1P17.90,T1P17.80,AZI1,F7K2.70,F7K2.40,T3P18.7,T3P18.6,AIR1B	8.84e-23	1.87e-19	Bifunctional inhibitor/plant lipid transfer protein/seed storage helical domain superfamily
InterPro	IPR010030	7	7	3702	AT2G46740,AT2G46760,AT2G46750,AT1G32300,AT5G56490,AT5G56470,AT5G11540	GULLO5,GULLO6,GULLO2,GULLO1,GULLO4,GULLO7,GULLO3	3.49e-13	5.53e-10	L-gulonolactone oxidase, plant
InterPro	IPR007173	7	8	3702	AT2G46740,AT2G46760,AT2G46750,AT1G32300,AT5G56490,AT5G56470,AT5G11540	GULLO5,GULLO6,GULLO2,GULLO1,GULLO4,GULLO7,GULLO3	6.52e-13	8.26e-10	D-arabinono-1,4-lactone oxidase, C-terminal domain
InterPro	IPR003175	6	7	3702	AT3G19150,AT2G23430,AT2G32710,AT1G49620,AT5G48820,AT3G24810	KRP6,KRP1-2,KRP4,KRP7,KRP3,KRP5	3.42e-11	3.61e-08	Cyclin-dependent kinase inhibitor domain
InterPro	IPR007130	6	7	3702	AT3G02030,AT5G41130,AT3G26820,AT5G41120,AT3G26840,AT1G54570	F1C9.19,MEE6.20,F4JDQ6_ARATH,MEE6.19,PES2,PES1	3.42e-11	3.61e-08	Diacylglycerol acyltransferase
InterPro	IPR044275	6	7	3702	AT3G19150,AT2G23430,AT2G32710,AT1G49620,AT5G48820,AT3G24810	KRP6,KRP1-2,KRP4,KRP7,KRP3,KRP5	3.42e-11	3.61e-08	Cyclin-dependent kinase inhibitor, plant
InterPro	IPR044898	6	7	3702	AT3G19150,AT2G23430,AT2G32710,AT1G49620,AT5G48820,AT3G24810	KRP6,KRP1-2,KRP4,KRP7,KRP3,KRP5	3.42e-11	3.61e-08	Cyclin-dependent kinase inhibitor domain superfamily
InterPro	IPR000070	9	67	3702	AT2G47030,AT5G27870,AT3G62170,AT2G47040,AT2G26450,AT3G05610,AT3G06830,AT5G49180,AT4G33230	PME4,PME28,VGDH2,PME5,PME13,PME21,PME23,PME58,PME45	2.83e-10	1.79e-07	Pectinesterase, catalytic
InterPro	IPR004468	5	5	3702	AT4G02120,AT1G30820,AT2G34890,AT4G20320,AT3G12670	T10M13.13,T17H7.12,F19I3.12,F1C12.230,T2E22.2	9.86e-10	5.67e-07	CTP synthase
InterPro	IPR017456	5	5	3702	AT4G02120,AT1G30820,AT2G34890,AT4G20320,AT3G12670	T10M13.13,T17H7.12,F19I3.12,F1C12.230,T2E22.2	9.86e-10	5.67e-07	CTP synthase, N-terminal
InterPro	IPR033828	5	5	3702	AT4G02120,AT1G30820,AT2G34890,AT4G20320,AT3G12670	T10M13.13,T17H7.12,F19I3.12,F1C12.230,T2E22.2	9.86e-10	5.67e-07	CTP synthase GATase domain
InterPro	IPR002554	5	9	3702	AT5G03470,AT3G09880,AT1G13460,AT4G15415,AT3G21650	B'ALPHA,B'BETA,B'THETA,B'GAMMA,B'ZETA	7.7e-09	3.48e-06	Protein phosphatase 2A, regulatory B subunit, B56
InterPro	IPR043198	5	9	3702	AT4G19560,AT4G19600,AT1G27630,AT1G35440,AT5G45190	CYCT1-2,CYCT1-4,CYCT1-3,CYCT1-1,CYCT1-5	7.7e-09	3.48e-06	Cyclin/Cyclin-like subunit Ssn8
InterPro	IPR034732	5	10	3702	AT1G04020,AT5G53430,AT4G21070,AT3G61740,AT4G27910	BARD1,ATX5,BRCA1,ATX3,ATX4	1.15e-08	4.55e-06	Extended PHD (ePHD) domain
InterPro	IPR033131	7	48	3702	AT2G47030,AT3G62170,AT2G47040,AT2G26450,AT3G06830,AT5G49180,AT4G33230	PME4,VGDH2,PME5,PME13,PME23,PME58,PME45	1.72e-08	6.41e-06	Pectinesterase, Asp active site
InterPro	IPR031066	5	12	3702	AT5G61270,AT1G68240,AT2G43010,AT5G67110,AT4G36930	BHLH72,BHLH109,PIF4,ALC,SPT	2.35e-08	8.26e-06	Basic helix-loop-helix (bHLH) transcription factors ALC-like, plant
InterPro	IPR035513	9	121	3702	AT2G47030,AT5G27870,AT3G62170,AT2G47040,AT2G26450,AT3G05610,AT3G06830,AT5G49180,AT4G33230	PME4,PME28,VGDH2,PME5,PME13,PME21,PME23,PME58,PME45	3.42e-08	1.14e-05	Invertase/pectin methylesterase inhibitor domain superfamily
InterPro	IPR006501	9	122	3702	AT2G47030,AT5G27870,AT3G62170,AT2G47040,AT2G26450,AT3G05610,AT3G06830,AT5G49180,AT4G33230	PME4,PME28,VGDH2,PME5,PME13,PME21,PME23,PME58,PME45	3.66e-08	1.16e-05	Pectinesterase inhibitor domain
InterPro	IPR047265	5	15	3702	AT5G61270,AT3G59060,AT2G43010,AT5G67110,AT4G36930	BHLH72,PIF5,PIF4,ALC,SPT	5.81e-08	1.75e-05	Transcription factor PIF1-like, basic helix-loop-helix domain
InterPro	IPR017926	5	18	3702	AT4G02120,AT1G30820,AT2G34890,AT4G20320,AT3G12670	T10M13.13,T17H7.12,F19I3.12,F1C12.230,T2E22.2	1.24e-07	3.58e-05	Glutamine amidotransferase
InterPro	IPR006094	6	44	3702	AT2G46740,AT2G46760,AT2G46750,AT1G32300,AT5G56490,AT5G11540	GULLO5,GULLO6,GULLO2,GULLO1,GULLO4,GULLO3	2.69e-07	7.42e-05	FAD linked oxidase, N-terminal
InterPro	IPR012334	9	163	3702	AT2G47030,AT5G27870,AT3G62170,AT2G47040,AT2G26450,AT3G05610,AT3G06830,AT5G49180,AT4G33230	PME4,PME28,VGDH2,PME5,PME13,PME21,PME23,PME58,PME45	3.78e-07	9.97e-05	Pectin lyase fold
InterPro	IPR011050	9	164	3702	AT2G47030,AT5G27870,AT3G62170,AT2G47040,AT2G26450,AT3G05610,AT3G06830,AT5G49180,AT4G33230	PME4,PME28,VGDH2,PME5,PME13,PME21,PME23,PME58,PME45	3.97e-07	0.0001	Pectin lyase fold/virulence factor
InterPro	IPR016167	6	48	3702	AT2G46740,AT2G46760,AT2G46750,AT1G32300,AT5G56490,AT5G11540	GULLO5,GULLO6,GULLO2,GULLO1,GULLO4,GULLO3	4.3e-07	0.0001	FAD-binding, type PCMH, subdomain 1
InterPro	IPR016166	6	50	3702	AT2G46740,AT2G46760,AT2G46750,AT1G32300,AT5G56490,AT5G11540	GULLO5,GULLO6,GULLO2,GULLO1,GULLO4,GULLO3	5.36e-07	0.00013	FAD-binding domain, PCMH-type
InterPro	IPR016169	6	52	3702	AT2G46740,AT2G46760,AT2G46750,AT1G32300,AT5G56490,AT5G11540	GULLO5,GULLO6,GULLO2,GULLO1,GULLO4,GULLO3	6.63e-07	0.00015	FAD-binding, type PCMH, subdomain 2
InterPro	IPR036318	6	52	3702	AT2G46740,AT2G46760,AT2G46750,AT1G32300,AT5G56490,AT5G11540	GULLO5,GULLO6,GULLO2,GULLO1,GULLO4,GULLO3	6.63e-07	0.00015	FAD-binding, type PCMH-like superfamily
InterPro	IPR029062	5	32	3702	AT4G02120,AT1G30820,AT2G34890,AT4G20320,AT3G12670	T10M13.13,T17H7.12,F19I3.12,F1C12.230,T2E22.2	1.52e-06	0.00032	Class I glutamine amidotransferase-like
InterPro	IPR013283	3	3	3702	AT4G19210,AT3G13640,AT4G30300	ABCE2,ABCE1,ABCE3	2.92e-06	0.0006	RLI1
InterPro	IPR025780	3	3	3702	AT5G53430,AT3G61740,AT4G27910	ATX5,ATX3,ATX4	2.92e-06	0.0006	Histone-lysine N-methyltransferase ATX
InterPro	IPR041955	3	3	3702	AT5G53430,AT3G61740,AT4G27910	ATX5,ATX3,ATX4	2.92e-06	0.0006	ATX3/4/5, ePHD domain
InterPro	IPR042011	3	3	3702	AT5G53430,AT3G61740,AT4G27910	ATX5,ATX3,ATX4	2.92e-06	0.0006	ATX3/4/5, PHD domain
InterPro	IPR006671	5	42	3702	AT4G19560,AT4G19600,AT1G27630,AT1G35440,AT5G45190	CYCT1-2,CYCT1-4,CYCT1-3,CYCT1-1,CYCT1-5	5.12e-06	0.00092	Cyclin, N-terminal
InterPro	IPR018040	4	18	3702	AT3G62170,AT2G47040,AT3G06830,AT5G49180	VGDH2,PME5,PME23,PME58	5.24e-06	0.00092	Pectinesterase, Tyr active site
InterPro	IPR019135	3	4	3702	AT4G16810,AT5G51230,AT4G16845	Dl4430c,EMF2,VRN2	5.1e-06	0.00092	Polycomb protein, VEFS-Box
InterPro	IPR013763	5	47	3702	AT4G19560,AT4G19600,AT1G27630,AT1G35440,AT5G45190	CYCT1-2,CYCT1-4,CYCT1-3,CYCT1-1,CYCT1-5	8.49e-06	0.0014	Cyclin-like domain
InterPro	IPR036915	5	62	3702	AT4G19560,AT4G19600,AT1G27630,AT1G35440,AT5G45190	CYCT1-2,CYCT1-4,CYCT1-3,CYCT1-1,CYCT1-5	2.96e-05	0.0048	Cyclin-like superfamily
InterPro	IPR021789	3	9	3702	AT2G26650,AT2G25600,AT4G32500	AKT1,AKT6,AKT5	3.14e-05	0.005	KHA domain
InterPro	IPR045319	3	9	3702	AT2G26650,AT2G25600,AT4G32500	AKT1,AKT6,AKT5	3.14e-05	0.005	Potassium channel KAT/AKT
InterPro	IPR003938	3	15	3702	AT2G26650,AT2G25600,AT4G32500	AKT1,AKT6,AKT5	0.00011	0.0172	Potassium channel, voltage-dependent, EAG/ELK/ERG
InterPro	IPR001597	2	2	3702	AT1G08630,AT3G04520	THA1,THA2	0.00017	0.0247	Aromatic amino acid beta-eliminating lyase/threonine aldolase
InterPro	IPR003616	3	19	3702	AT5G53430,AT3G61740,AT4G27910	ATX5,ATX3,ATX4	0.00021	0.0247	Post-SET domain
InterPro	IPR010084	2	2	3702	AT5G10160,AT2G22230	T31P16.150,T26C19.11	0.00017	0.0247	Beta-hydroxyacyl-(acyl-carrier-protein) dehydratase FabZ
InterPro	IPR011989	8	284	3702	AT3G03110,AT3G13330,AT5G03470,AT3G09880,AT1G13460,AT4G15415,AT3G21650,AT5G17020	XPO1B,PA200,B'ALPHA,B'BETA,B'THETA,B'GAMMA,B'ZETA,XPO1	0.00018	0.0247	Armadillo-like helical
InterPro	IPR012476	2	2	3702	AT4G05523,AT1G13120	F4JGH3_ARATH,GLE1	0.00017	0.0247	mRNA export factor GLE1-like
InterPro	IPR012878	2	2	3702	AT5G12960,AT5G12950	T24H18.130,T24H18.120	0.00017	0.0247	Beta-L-arabinofuranosidase, GH127
InterPro	IPR013114	2	2	3702	AT5G10160,AT2G22230	T31P16.150,T26C19.11	0.00017	0.0247	Beta-hydroxydecanoyl thiol ester dehydrase, FabA/FabZ
InterPro	IPR014854	2	2	3702	AT3G20760,AT1G51130	NSE4B,NSE4A	0.00017	0.0247	Non-structural maintenance of chromosome element 4, C-terminal
InterPro	IPR014877	2	2	3702	AT3G03110,AT5G17020	XPO1B,XPO1	0.00017	0.0247	Exportin-1, C-terminal
InterPro	IPR023603	2	2	3702	AT1G08630,AT3G04520	THA1,THA2	0.00017	0.0247	Low specificity L-threonine aldolase
InterPro	IPR027786	2	2	3702	AT3G20760,AT1G51130	NSE4B,NSE4A	0.00017	0.0247	Nse4/EID family
InterPro	IPR031099	2	2	3702	AT1G04020,AT4G21070	BARD1,BRCA1	0.00017	0.0247	BRCA1-associated
InterPro	IPR034348	2	2	3702	AT4G19210,AT3G13640	ABCE2,ABCE1	0.00017	0.0247	RLI, domain 1
InterPro	IPR040485	2	2	3702	AT3G03110,AT5G17020	XPO1B,XPO1	0.00017	0.0247	Exportin-1, repeat 3
InterPro	IPR041123	2	2	3702	AT3G03110,AT5G17020	XPO1B,XPO1	0.00017	0.0247	Chromosome region maintenance repeat
InterPro	IPR041235	2	2	3702	AT3G03110,AT5G17020	XPO1B,XPO1	0.00017	0.0247	Exportin-1, repeat 2
InterPro	IPR000313	3	20	3702	AT5G53430,AT3G61740,AT4G27910	ATX5,ATX3,ATX4	0.00024	0.026	PWWP domain
InterPro	IPR007209	2	3	3702	AT4G19210,AT3G13640	ABCE2,ABCE1	0.00028	0.0294	RNase L inhibitor RLI-like, possible metal-binding domain
InterPro	IPR045065	2	3	3702	AT3G03110,AT5G17020	XPO1B,XPO1	0.00028	0.0294	Exportin-1/5
InterPro	IPR046845	2	3	3702	AT5G20995,AT2G46980	A0A1P8BGT8,ASY3	0.00028	0.0294	Meiosis-specific protein ASY3-like, coiled-coil
InterPro	IPR036638	6	163	3702	AT5G61270,AT1G68240,AT3G59060,AT2G43010,AT5G67110,AT4G36930	BHLH72,BHLH109,PIF5,PIF4,ALC,SPT	0.0003	0.03	Helix-loop-helix DNA-binding domain superfamily
InterPro	IPR011598	6	165	3702	AT5G61270,AT1G68240,AT3G59060,AT2G43010,AT5G67110,AT4G36930	BHLH72,BHLH109,PIF5,PIF4,ALC,SPT	0.00032	0.0315	Myc-type, basic helix-loop-helix (bHLH) domain
InterPro	IPR000977	2	4	3702	AT1G49250,AT1G08130	F13F21.31,LIG1	0.00042	0.0406	DNA ligase, ATP-dependent
InterPro	IPR012308	2	4	3702	AT1G49250,AT1G08130	F13F21.31,LIG1	0.00042	0.0406	DNA ligase, ATP-dependent, N-terminal
InterPro	IPR012309	2	4	3702	AT1G49250,AT1G08130	F13F21.31,LIG1	0.00042	0.0406	DNA ligase, ATP-dependent, C-terminal
InterPro	IPR016059	2	4	3702	AT1G49250,AT1G08130	F13F21.31,LIG1	0.00042	0.0406	DNA ligase, ATP-dependent, conserved site
InterPro	IPR036599	2	4	3702	AT1G49250,AT1G08130	F13F21.31,LIG1	0.00042	0.0406	DNA ligase, ATP-dependent, N-terminal domain superfamily
InterPro	IPR041693	2	4	3702	AT1G19710,AT1G75420	AT1G19710,AT1G75420	0.00042	0.0406	Glycosyl-transferase family 4_5
Pfam	PF04030	7	8	3702	AT2G46740,AT2G46760,AT2G46750,AT1G32300,AT5G56490,AT5G56470,AT5G11540	GULLO5,GULLO6,GULLO2,GULLO1,GULLO4,GULLO7,GULLO3	6.52e-13	1.35e-09	D-arabinono-1,4-lactone oxidase
Pfam	PF02234	6	7	3702	AT3G19150,AT2G23430,AT2G32710,AT1G49620,AT5G48820,AT3G24810	KRP6,KRP1-2,KRP4,KRP7,KRP3,KRP5	3.42e-11	3.54e-08	Cyclin-dependent kinase inhibitor
Pfam	PF01095	9	67	3702	AT2G47030,AT5G27870,AT3G62170,AT2G47040,AT2G26450,AT3G05610,AT3G06830,AT5G49180,AT4G33230	PME4,PME28,VGDH2,PME5,PME13,PME21,PME23,PME58,PME45	2.83e-10	1.95e-07	Pectinesterase
Pfam	PF06418	5	5	3702	AT4G02120,AT1G30820,AT2G34890,AT4G20320,AT3G12670	T10M13.13,T17H7.12,F19I3.12,F1C12.230,T2E22.2	9.86e-10	5.1e-07	CTP synthase N-terminus
Pfam	PF01603	5	9	3702	AT5G03470,AT3G09880,AT1G13460,AT4G15415,AT3G21650	B'ALPHA,B'BETA,B'THETA,B'GAMMA,B'ZETA	7.7e-09	3.19e-06	Protein phosphatase 2A regulatory B subunit (B56 family)
Pfam	PF01565	6	44	3702	AT2G46740,AT2G46760,AT2G46750,AT1G32300,AT5G56490,AT5G11540	GULLO5,GULLO6,GULLO2,GULLO1,GULLO4,GULLO3	2.69e-07	9.29e-05	FAD binding domain
Pfam	PF07722	4	12	3702	AT4G02120,AT1G30820,AT2G34890,AT4G20320	T10M13.13,T17H7.12,F19I3.12,F1C12.230	1.34e-06	0.00039	Peptidase C26
Pfam	PF09733	3	4	3702	AT4G16810,AT5G51230,AT4G16845	Dl4430c,EMF2,VRN2	5.1e-06	0.0013	VEFS-Box of polycomb protein
Pfam	PF11834	3	9	3702	AT2G26650,AT2G25600,AT4G32500	AKT1,AKT6,AKT5	3.14e-05	0.0072	KHA, dimerisation domain of potassium ion channel
Pfam	PF07885	3	15	3702	AT2G26650,AT2G25600,AT4G32500	AKT1,AKT6,AKT5	0.00011	0.0235	Ion channel
Pfam	PF07944	2	2	3702	AT5G12960,AT5G12950	T24H18.130,T24H18.120	0.00017	0.0316	Beta-L-arabinofuranosidase, GH127
Pfam	PF08743	2	2	3702	AT3G20760,AT1G51130	NSE4B,NSE4A	0.00017	0.0316	Nse4 C-terminal
Pfam	PF09414	2	2	3702	AT1G49250,AT1G08130	F13F21.31,LIG1	0.00017	0.0316	RNA ligase
Pfam	PF00855	3	20	3702	AT5G53430,AT3G61740,AT4G27910	ATX5,ATX3,ATX4	0.00024	0.0358	PWWP domain
Pfam	PF04068	2	3	3702	AT4G19210,AT3G13640	ABCE2,ABCE1	0.00028	0.0384	Possible Fer4-like domain in RNase L inhibitor, RLI
PMID	PMID:35642916	10	27	3702	AT3G22120,AT1G12090,AT5G46900,AT4G12480,AT5G46890,AT4G12550,AT2G10940,AT4G12470,AT1G62510,AT4G12545	CWLP,ELP,extA,EARLI1,MQD22.2,AIR1,F15K19.1,AZI1,T3P18.7,AIR1B	4.13e-15	4.07e-10	(2022) Friend or foe: Hybrid proline-rich proteins determine how plants respond to beneficial and pathogenic microbes.
PMID	PMID:33407094	9	25	3702	AT2G46740,AT2G46760,AT1G07890,AT3G09640,AT2G46750,AT1G32300,AT5G56490,AT5G56470,AT5G11540	GULLO5,GULLO6,APX1,APX2,GULLO2,GULLO1,GULLO4,GULLO7,GULLO3	1.26e-13	6.18e-09	(2021) Three metabolic pathways are responsible for the accumulation and maintenance of high AsA content in kiwifruit (Actinidia eriantha).
PMID	PMID:15082929	7	8	3702	AT2G46740,AT2G46760,AT2G46750,AT1G32300,AT5G56490,AT5G56470,AT5G11540	GULLO5,GULLO6,GULLO2,GULLO1,GULLO4,GULLO7,GULLO3	6.52e-13	2.14e-08	(2003) L-Gulono-1,4-lactone oxidase expression rescues vitamin C-deficient Arabidopsis (vtc) mutants.
PMID	PMID:30105046	7	10	3702	AT2G46740,AT2G46760,AT2G46750,AT1G32300,AT5G56490,AT5G56470,AT5G11540	GULLO5,GULLO6,GULLO2,GULLO1,GULLO4,GULLO7,GULLO3	1.95e-12	4.8e-08	(2018) Characterization of a L-Gulono-1,4-Lactone Oxidase Like Protein in the Floral Nectar of Mucuna sempervirens, Fabaceae.
PMID	PMID:37332730	7	11	3702	AT2G46740,AT2G46760,AT2G46750,AT1G32300,AT5G56490,AT5G56470,AT5G11540	GULLO5,GULLO6,GULLO2,GULLO1,GULLO4,GULLO7,GULLO3	3.18e-12	6.26e-08	(2023) Ascorbate peroxidase plays an important role in photoacclimation in the extremophilic red alga Cyanidiococcus yangmingshanensis.
PMID	PMID:31568501	7	12	3702	AT2G46740,AT2G46760,AT2G46750,AT1G32300,AT5G56490,AT5G56470,AT5G11540	GULLO5,GULLO6,GULLO2,GULLO1,GULLO4,GULLO7,GULLO3	5.02e-12	8.22e-08	(2019) Within species expressed genetic variability and gene expression response to different temperatures in the rotifer Brachionus calyciflorus sensu stricto.
PMID	PMID:29567393	9	42	3702	AT3G02030,AT2G46740,AT2G46760,AT1G07890,AT2G46750,AT1G32300,AT5G56490,AT5G56470,AT5G11540	F1C9.19,GULLO5,GULLO6,APX1,GULLO2,GULLO1,GULLO4,GULLO7,GULLO3	6.75e-12	9.48e-08	(2018) Ascorbic acid metabolism and functions: A comparison of plants and mammals.
PMID	PMID:31494267	7	15	3702	AT2G46740,AT2G46760,AT2G46750,AT1G32300,AT5G56490,AT5G56470,AT5G11540	GULLO5,GULLO6,GULLO2,GULLO1,GULLO4,GULLO7,GULLO3	1.68e-11	2.06e-07	(2019) Proteomics Analysis of Lipid Droplets from the Oleaginous Alga Chromochloris zofingiensis Reveals Novel Proteins for Lipid Metabolism.
PMID	PMID:37592232	7	16	3702	AT4G02120,AT1G30820,AT2G34890,AT4G20320,AT4G21070,AT3G12670,AT5G66750	T10M13.13,T17H7.12,F19I3.12,F1C12.230,BRCA1,T2E22.2,DDM1	2.4e-11	2.62e-07	(2023) Resequencing of global Lotus corniculatus accessions reveals population distribution and genetic loci, associated with cyanogenic glycosides accumulation and growth traits.
PMID	PMID:30102814	7	16	3702	AT2G46740,AT2G46760,AT2G46750,AT1G32300,AT5G56490,AT5G56470,AT5G11540	GULLO5,GULLO6,GULLO2,GULLO1,GULLO4,GULLO7,GULLO3	2.4e-11	2.62e-07	(2019) The Myo-inositol pathway does not contribute to ascorbic acid synthesis.
PMID	PMID:33173574	7	17	3702	AT2G46740,AT2G46760,AT2G46750,AT1G32300,AT5G56490,AT5G56470,AT5G11540	GULLO5,GULLO6,GULLO2,GULLO1,GULLO4,GULLO7,GULLO3	3.37e-11	3.01e-07	(2020) Molecular evolution of GDP-L-galactose phosphorylase, a key regulatory gene in plant ascorbate biosynthesis.
PMID	PMID:26602763	6	7	3702	AT2G46740,AT2G46760,AT2G46750,AT1G32300,AT5G56490,AT5G11540	GULLO5,GULLO6,GULLO2,GULLO1,GULLO4,GULLO3	3.42e-11	3.01e-07	(2015) De novo assembly and functional annotation of Myrciaria dubia fruit transcriptome reveals multiple metabolic pathways for L-ascorbic acid biosynthesis.
PMID	PMID:28393854	7	18	3702	AT2G46740,AT2G46760,AT2G46750,AT1G32300,AT5G56490,AT5G56470,AT5G11540	GULLO5,GULLO6,GULLO2,GULLO1,GULLO4,GULLO7,GULLO3	4.66e-11	3.52e-07	(2017) Transcriptomic analysis of the biosynthesis, recycling, and distribution of ascorbic acid during leaf development in tea plant (Camellia sinensis (L.) O. Kuntze).
PMID	PMID:23245200	7	18	3702	AT2G46740,AT2G46760,AT2G46750,AT1G32300,AT5G56490,AT5G56470,AT5G11540	GULLO5,GULLO6,GULLO2,GULLO1,GULLO4,GULLO7,GULLO3	4.66e-11	3.52e-07	(2012) Regulation of fruit ascorbic acid concentrations during ripening in high and low vitamin C tomato cultivars.
PMID	PMID:20346686	9	55	3702	AT3G02030,AT2G46740,AT2G46760,AT3G09640,AT2G46750,AT1G32300,AT5G56490,AT5G56470,AT5G11540	F1C9.19,GULLO5,GULLO6,APX2,GULLO2,GULLO1,GULLO4,GULLO7,GULLO3	5.76e-11	3.78e-07	(2010) Exploring the impact of wounding and jasmonates on ascorbate metabolism.
PMID	PMID:37108695	7	19	3702	AT2G46740,AT2G46760,AT2G46750,AT1G32300,AT5G56490,AT5G56470,AT5G11540	GULLO5,GULLO6,GULLO2,GULLO1,GULLO4,GULLO7,GULLO3	6.35e-11	3.9e-07	(2023) Identification of the GDP-L-Galactose Phosphorylase Gene as a Candidate for the Regulation of Ascorbic Acid Content in Fruits of Capsicum annuum L.
PMID	PMID:31993036	7	21	3702	AT2G46740,AT2G46760,AT2G46750,AT1G32300,AT5G56490,AT5G56470,AT5G11540	GULLO5,GULLO6,GULLO2,GULLO1,GULLO4,GULLO7,GULLO3	1.13e-10	6.55e-07	(2019) Biosynthesis of Ascorbic Acid as a Glucose-Induced Photoprotective Process in the Extremophilic Red Alga Galdieria partita.
PMID	PMID:36600921	7	22	3702	AT2G46740,AT2G46760,AT2G46750,AT1G32300,AT5G56490,AT5G56470,AT5G11540	GULLO5,GULLO6,GULLO2,GULLO1,GULLO4,GULLO7,GULLO3	1.49e-10	8.12e-07	(2022) The perils of planning strategies to increase vitamin C content in plants: Beyond the hype.
PMID	PMID:35670759	9	63	3702	AT3G02030,AT2G46740,AT2G46760,AT1G07890,AT2G46750,AT1G32300,AT5G56490,AT5G56470,AT5G11540	F1C9.19,GULLO5,GULLO6,APX1,GULLO2,GULLO1,GULLO4,GULLO7,GULLO3	1.72e-10	8.89e-07	(2022) Proteomic and metabolic disturbances in lignin-modified Brachypodium distachyon.
PMID	PMID:30952924	8	42	3702	AT3G02030,AT2G46740,AT2G46760,AT2G46750,AT1G32300,AT5G56490,AT5G56470,AT5G11540	F1C9.19,GULLO5,GULLO6,GULLO2,GULLO1,GULLO4,GULLO7,GULLO3	2.37e-10	1.16e-06	(2019) Genome-wide analysis in Hevea brasiliensis laticifers revealed species-specific post-transcriptional regulations of several redox-related genes.
PMID	PMID:17253089	6	11	3702	AT3G19150,AT2G23430,AT2G32710,AT1G49620,AT5G48820,AT3G24810	KRP6,KRP1-2,KRP4,KRP7,KRP3,KRP5	2.42e-10	1.16e-06	(2007) Arabidopsis cyclin-dependent kinase inhibitors are nuclear-localized and show different localization patterns within the nucleoplasm.
PMID	PMID:30594134	8	48	3702	AT3G02030,AT2G46740,AT2G46760,AT2G46750,AT1G32300,AT5G56490,AT5G56470,AT5G11540	F1C9.19,GULLO5,GULLO6,GULLO2,GULLO1,GULLO4,GULLO7,GULLO3	6.1e-10	2.73e-06	(2018) Transciptome profiling at early infection of Elaeis guineensis by Ganoderma boninense provides novel insights on fungal transition from biotrophic to necrotrophic phase.
PMID	PMID:31835394	7	29	3702	AT2G46740,AT2G46760,AT2G46750,AT1G32300,AT5G56490,AT5G56470,AT5G11540	GULLO5,GULLO6,GULLO2,GULLO1,GULLO4,GULLO7,GULLO3	7.71e-10	3.29e-06	(2019) Genetic Engineering for Global Food Security: Photosynthesis and Biofortification.
PMID	PMID:28103637	5	5	3702	AT3G19150,AT2G32710,AT1G49620,AT5G48820,AT3G24810	KRP6,KRP4,KRP7,KRP3,KRP5	9.86e-10	3.88e-06	(2017) Exploiting cell cycle inhibitor genes of the KRP family to control root-knot nematode induced feeding sites in plants.
PMID	PMID:25768426	7	30	3702	AT2G46740,AT2G46760,AT2G46750,AT1G32300,AT5G56490,AT5G56470,AT5G11540	GULLO5,GULLO6,GULLO2,GULLO1,GULLO4,GULLO7,GULLO3	9.46e-10	3.88e-06	(2015) Evolution of alternative biosynthetic pathways for vitamin C following plastid acquisition in photosynthetic eukaryotes.
PMID	PMID:15037450	5	5	3702	AT3G19150,AT2G32710,AT1G49620,AT5G48820,AT3G24810	KRP6,KRP4,KRP7,KRP3,KRP5	9.86e-10	3.88e-06	(2004) Analysis of the spatial expression pattern of seven Kip related proteins (KRPs) in the shoot apex of Arabidopsis thaliana.
PMID	PMID:37777761	7	32	3702	AT3G02030,AT4G02120,AT1G30820,AT2G34890,AT2G46980,AT4G20320,AT3G12670	F1C9.19,T10M13.13,T17H7.12,F19I3.12,ASY3,F1C12.230,T2E22.2	1.4e-09	5.1e-06	(2023) The development of proximity labeling technology and its applications in mammals, plants, and microorganisms.
PMID	PMID:23440171	6	16	3702	AT3G19150,AT2G23430,AT2G32710,AT1G49620,AT5G48820,AT3G24810	KRP6,KRP1-2,KRP4,KRP7,KRP3,KRP5	1.43e-09	5.1e-06	(2013) The Arabidopsis CDK inhibitor ICK3KRP5 is rate limiting for primary root growth and promotes growth through cell elongation and endoreduplication.
PMID	PMID:33747023	7	33	3702	AT2G46740,AT2G46760,AT2G46750,AT1G32300,AT5G56490,AT5G56470,AT5G11540	GULLO5,GULLO6,GULLO2,GULLO1,GULLO4,GULLO7,GULLO3	1.69e-09	5.73e-06	(2021) Biosynthesis and Cellular Functions of Tartaric Acid in Grapevines.
PMID	PMID:36499609	5	6	3702	AT4G02120,AT1G30820,AT2G34890,AT4G20320,AT3G12670	T10M13.13,T17H7.12,F19I3.12,F1C12.230,T2E22.2	1.8e-09	5.9e-06	(2022) Cytoophidia Maintain the Integrity of Drosophila Follicle Epithelium.
PMID	PMID:31671820	8	56	3702	AT2G46740,AT2G46760,AT1G07890,AT2G46750,AT1G32300,AT5G56490,AT5G56470,AT5G11540	GULLO5,GULLO6,APX1,GULLO2,GULLO1,GULLO4,GULLO7,GULLO3	1.83e-09	5.9e-06	(2019) Vitamin C in Plants: From Functions to Biofortification.
PMID	PMID:28943880	5	7	3702	AT3G19150,AT2G32710,AT1G49620,AT5G48820,AT3G24810	KRP6,KRP4,KRP7,KRP3,KRP5	3.07e-09	9.44e-06	(2017) Plant Cyclin-Dependent Kinase Inhibitors of the KRP Family: Potent Inhibitors of Root-Knot Nematode Feeding Sites in Plant Roots.
PMID	PMID:27769939	6	19	3702	AT5G03470,AT3G09880,AT2G26650,AT2G25600,AT4G15415,AT4G32500	B'ALPHA,B'BETA,AKT1,AKT6,B'GAMMA,AKT5	3.35e-09	9.98e-06	(2017) Immunopurification and Mass Spectrometry Identifies Protein Phosphatase 2A (PP2A) and BIN2GSK3 as Regulators of AKS Transcription Factors in Arabidopsis.
PMID	PMID:30405645	6	20	3702	AT2G46740,AT2G46760,AT2G46750,AT1G32300,AT5G56490,AT5G11540	GULLO5,GULLO6,GULLO2,GULLO1,GULLO4,GULLO3	4.34e-09	1.25e-05	(2018) Genome-Wide Association Study Identifies Candidate Genes Related to Seed Oil Composition and Protein Content in Gossypium hirsutum L.
PMID	PMID:28188267	5	8	3702	AT4G19560,AT4G19600,AT1G27630,AT1G35440,AT5G45190	CYCT1-2,CYCT1-4,CYCT1-3,CYCT1-1,CYCT1-5	4.97e-09	1.4e-05	(2017) Phosphorylation of SPT5 by CDKD;2 Is Required for VIP5 Recruitment and Normal Flowering in Arabidopsis thaliana.
PMID	PMID:26839516	5	8	3702	AT4G02120,AT1G30820,AT2G34890,AT4G20320,AT3G12670	T10M13.13,T17H7.12,F19I3.12,F1C12.230,T2E22.2	4.97e-09	1.4e-05	(2016) Vectors for Genetically-Encoded Tags for Electron Microscopy Contrast in Drosophila.
PMID	PMID:12678503	5	8	3702	AT4G19560,AT4G19600,AT1G27630,AT1G35440,AT5G45190	CYCT1-2,CYCT1-4,CYCT1-3,CYCT1-1,CYCT1-5	4.97e-09	1.4e-05	(2003) Novel complexes of cyclin-dependent kinases and a cyclin-like protein from Arabidopsis thaliana with a function unrelated to cell division.
PMID	PMID:36507441	7	40	3702	AT2G46740,AT2G46760,AT2G46750,AT1G32300,AT5G56490,AT5G56470,AT5G11540	GULLO5,GULLO6,GULLO2,GULLO1,GULLO4,GULLO7,GULLO3	5.53e-09	1.43e-05	(2022) Ascorbate synthesis as an alternative electron source for mitochondrial respiration: Possible implications for the plant performance.
PMID	PMID:35315701	7	41	3702	AT2G46740,AT2G46760,AT2G46750,AT1G32300,AT5G56490,AT5G56470,AT5G11540	GULLO5,GULLO6,GULLO2,GULLO1,GULLO4,GULLO7,GULLO3	6.44e-09	1.62e-05	(2022) Mining the Flavoproteome of Brucella ovis, the Brucellosis Causing Agent in Ovis aries.
PMID	PMID:28744455	7	41	3702	AT2G46740,AT2G46760,AT2G46750,AT1G32300,AT5G56490,AT5G56470,AT5G11540	GULLO5,GULLO6,GULLO2,GULLO1,GULLO4,GULLO7,GULLO3	6.44e-09	1.62e-05	(2017) Genetic Control of Ascorbic Acid Biosynthesis and Recycling in Horticultural Crops.
PMID	PMID:24470468	5	9	3702	AT4G19560,AT4G19600,AT1G27630,AT1G35440,AT5G45190	CYCT1-2,CYCT1-4,CYCT1-3,CYCT1-1,CYCT1-5	7.7e-09	1.85e-05	(2014) Endopolyploidy as a potential alternative adaptive strategy for Arabidopsis leaf size variation in response to UV-B.
PMID	PMID:32252420	5	10	3702	AT3G19150,AT2G23430,AT1G49620,AT5G48820,AT3G24810	KRP6,KRP1-2,KRP7,KRP3,KRP5	1.15e-08	2.69e-05	(2020) Cyclin-Dependent Kinase Inhibitor Gene TaICK1 acts as a Potential Contributor to Wheat Male Sterility induced by a Chemical Hybridizing Agent.
PMID	PMID:18596929	5	10	3702	AT4G19560,AT4G19600,AT1G27630,AT1G35440,AT5G45190	CYCT1-2,CYCT1-4,CYCT1-3,CYCT1-1,CYCT1-5	1.15e-08	2.69e-05	(2008) CyclinPred: a SVM-based method for predicting cyclin protein sequences.
PMID	PMID:22879821	6	25	3702	AT3G19150,AT2G23430,AT2G32710,AT1G49620,AT5G48820,AT3G24810	KRP6,KRP1-2,KRP4,KRP7,KRP3,KRP5	1.36e-08	3.03e-05	(2012) A general G1S-phase cell-cycle control module in the flowering plant Arabidopsis thaliana.
PMID	PMID:32853565	5	11	3702	AT4G02120,AT1G30820,AT2G34890,AT4G20320,AT3G12670	T10M13.13,T17H7.12,F19I3.12,F1C12.230,T2E22.2	1.66e-08	3.64e-05	(2021) Phosphofructokinase relocalizes into subcellular compartments with liquid-like properties in vivo.
PMID	PMID:34961191	7	48	3702	AT2G46740,AT2G46760,AT2G46750,AT1G32300,AT5G56490,AT5G56470,AT5G11540	GULLO5,GULLO6,GULLO2,GULLO1,GULLO4,GULLO7,GULLO3	1.72e-08	3.64e-05	(2021) Alterations in the Transcriptome of Rye Plants following the Microdochium nivale Infection: Identification of ResistanceSusceptibility-Related Reactions Based on RNA-Seq Analysis.
PMID	PMID:29285398	7	48	3702	AT2G46740,AT2G46760,AT2G46750,AT1G32300,AT5G56490,AT5G56470,AT5G11540	GULLO5,GULLO6,GULLO2,GULLO1,GULLO4,GULLO7,GULLO3	1.72e-08	3.64e-05	(2017) Combination of iTRAQ proteomics and RNA-seq transcriptomics reveals multiple levels of regulation in phytoplasma-infected Ziziphus jujuba Mill.
PMID	PMID:30112455	5	11	3702	AT2G46740,AT2G46750,AT1G32300,AT5G56470,AT5G11540	GULLO5,GULLO2,GULLO1,GULLO7,GULLO3	1.66e-08	3.64e-05	(2017) Characterization of Two Arabidopsis L-Gulono-1,4-lactone Oxidases, AtGulLO3 and AtGulLO5, Involved in Ascorbate Biosynthesis.
PMID	PMID:26950157	6	27	3702	AT5G03470,AT3G09880,AT3G09640,AT1G13460,AT4G15415,AT3G21650	B'ALPHA,B'BETA,APX2,B'THETA,B'GAMMA,B'ZETA	2.02e-08	4.06e-05	(2016) PP2A Phosphatase as a Regulator of ROS Signaling in Plants.
PMID	PMID:29513662	6	29	3702	AT3G19150,AT2G23430,AT2G32710,AT1G49620,AT5G48820,AT3G24810	KRP6,KRP1-2,KRP4,KRP7,KRP3,KRP5	2.94e-08	5.78e-05	(2018) Arabidopsis ICKKRP cyclin-dependent kinase inhibitors function to ensure the formation of one megaspore mother cell and one functional megaspore per ovule.
PMID	PMID:29520285	5	13	3702	AT4G02120,AT1G30820,AT2G34890,AT4G20320,AT3G12670	T10M13.13,T17H7.12,F19I3.12,F1C12.230,T2E22.2	3.24e-08	6.24e-05	(2018) Chloroplast Glutamine Synthetase, the Key Regulator of Nitrogen Metabolism in Wheat, Performs Its Role by Fine Regulation of Enzyme Activity via Negative Cooperativity of Its Subunits.
PMID	PMID:30635559	6	32	3702	AT3G02030,AT5G61270,AT5G25350,AT3G59060,AT2G43010,AT2G25490	F1C9.19,BHLH72,EBF2,PIF5,PIF4,EBF1	4.93e-08	9.33e-05	(2019) Daytime temperature is sensed by phytochrome B in Arabidopsis through a transcriptional activator HEMERA.
PMID	PMID:32717893	7	61	3702	AT4G19560,AT5G25350,AT4G19600,AT1G27630,AT1G35440,AT5G45190,AT2G25490	CYCT1-2,EBF2,CYCT1-4,CYCT1-3,CYCT1-1,CYCT1-5,EBF1	7.76e-08	0.00014	(2020) Transcriptome Profiling Provides Molecular Insights into Auxin-Induced Adventitious Root Formation in Sugarcane (Saccharum spp. Interspecific Hybrids) Microshoots.
PMID	PMID:38996075	4	5	3702	AT5G03470,AT3G09880,AT3G59060,AT2G43010	B'ALPHA,B'BETA,PIF5,PIF4	9.52e-08	0.00017	(2024) PHOSPHATASE 2A dephosphorylates PHYTOCHROME-INTERACTING FACTOR3 to modulate photomorphogenesis in Arabidopsis.
PMID	PMID:36778678	5	17	3702	AT3G19150,AT2G32710,AT1G49620,AT5G48820,AT3G24810	KRP6,KRP4,KRP7,KRP3,KRP5	9.78e-08	0.00017	(2023) Characterization of the soybean KRP gene family reveals a key role for GmKRP2a in root development.
PMID	PMID:33686674	5	17	3702	AT3G02030,AT5G61270,AT5G25350,AT2G43010,AT2G25490	F1C9.19,BHLH72,EBF2,PIF4,EBF1	9.78e-08	0.00017	(2021) Direct phosphorylation of HY5 by SPA kinases to regulate photomorphogenesis in Arabidopsis.
PMID	PMID:21081187	5	17	3702	AT4G19560,AT4G19600,AT1G27630,AT1G35440,AT5G45190	CYCT1-2,CYCT1-4,CYCT1-3,CYCT1-1,CYCT1-5	9.78e-08	0.00017	(2011) Pol II waiting in the starting gates: Regulating the transition from transcription initiation into productive elongation.
PMID	PMID:31980689	7	64	3702	AT2G46740,AT2G46760,AT2G46750,AT1G32300,AT5G56490,AT5G56470,AT5G11540	GULLO5,GULLO6,GULLO2,GULLO1,GULLO4,GULLO7,GULLO3	1.05e-07	0.00018	(2020) Transcriptome analysis of potato shoots, roots and stolons under nitrogen stress.
PMID	PMID:33396893	4	6	3702	AT5G03470,AT1G13460,AT4G15415,AT3G21650	B'ALPHA,B'THETA,B'GAMMA,B'ZETA	1.58e-07	0.00026	(2020) Specific PP2A Catalytic Subunits Are a Prerequisite for Positive Growth Effects in Arabidopsis Co-Cultivated with Azospirillum brasilense and Pseudomonas simiae.
PMID	PMID:25950761	4	6	3702	AT3G09880,AT1G13460,AT4G15415,AT3G21650	B'BETA,B'THETA,B'GAMMA,B'ZETA	1.58e-07	0.00026	(2015) Evolutionary Analysis of the B56 Gene Family of PP2A Regulatory Subunits.
PMID	PMID:25216177	5	19	3702	AT4G02120,AT1G30820,AT2G34890,AT4G20320,AT3G12670	T10M13.13,T17H7.12,F19I3.12,F1C12.230,T2E22.2	1.57e-07	0.00026	(2014) Systemic suppression of the shoot metabolism upon rice root nematode infection.
PMID	PMID:34917117	5	20	3702	AT4G02120,AT1G30820,AT2G34890,AT4G20320,AT3G12670	T10M13.13,T17H7.12,F19I3.12,F1C12.230,T2E22.2	1.95e-07	0.00031	(2021) Cytosolic CTP Production Limits the Establishment of Photosynthesis in Arabidopsis.
PMID	PMID:26724867	5	21	3702	AT5G61270,AT5G25350,AT3G59060,AT2G43010,AT2G25490	BHLH72,EBF2,PIF5,PIF4,EBF1	2.4e-07	0.00037	(2016) Cryptochromes Interact Directly with PIFs to Control Plant Growth in Limiting Blue Light.
PMID	PMID:33147292	6	44	3702	AT2G46740,AT2G46760,AT2G46750,AT1G32300,AT5G56490,AT5G11540	GULLO5,GULLO6,GULLO2,GULLO1,GULLO4,GULLO3	2.69e-07	0.00041	(2020) Mitogen activated protein kinase (MAPK)-regulated genes with predicted signal peptides function in the Glycine max defense response to the root pathogenic nematode Heterodera glycines.
PMID	PMID:19277118	6	44	3702	AT3G19150,AT2G23430,AT2G32710,AT1G49620,AT5G48820,AT3G24810	KRP6,KRP1-2,KRP4,KRP7,KRP3,KRP5	2.69e-07	0.00041	(2009) The Arabidopsis thaliana F-box protein FBL17 is essential for progression through the second mitosis during pollen development.
PMID	PMID:36555537	5	22	3702	AT3G02030,AT5G25350,AT3G59060,AT2G43010,AT2G25490	F1C9.19,EBF2,PIF5,PIF4,EBF1	2.94e-07	0.00044	(2022) EBF1 Negatively Regulates Brassinosteroid-Induced Apical Hook Development and Cell Elongation through Promoting BZR1 Degradation.
PMID	PMID:33916802	6	45	3702	AT2G46740,AT2G46760,AT2G46750,AT1G32300,AT5G56490,AT5G11540	GULLO5,GULLO6,GULLO2,GULLO1,GULLO4,GULLO3	3.04e-07	0.00044	(2021) Transcriptome Analysis Reveals Genes of Flooding-Tolerant and Flooding-Sensitive Rapeseeds Differentially Respond to Flooding at the Germination Stage.
PMID	PMID:25153119	5	22	3702	AT4G02120,AT1G30820,AT2G34890,AT4G20320,AT3G12670	T10M13.13,T17H7.12,F19I3.12,F1C12.230,T2E22.2	2.94e-07	0.00044	(2014) Characterization of gene expression associated with drought avoidance and tolerance traits in a perennial grass species.
PMID	PMID:28369656	5	25	3702	AT3G02030,AT3G19150,AT2G23430,AT1G49620,AT3G24810	F1C9.19,KRP6,KRP1-2,KRP7,KRP5	5.12e-07	0.00073	(2017) Two maize Kip-related proteins differentially interact with, inhibit and are phosphorylated by cyclin D-cyclin-dependent kinase complexes.
PMID	PMID:22722403	5	25	3702	AT4G19560,AT4G19600,AT1G27630,AT1G35440,AT5G45190	CYCT1-2,CYCT1-4,CYCT1-3,CYCT1-1,CYCT1-5	5.12e-07	0.00073	(2012) BET domain co-regulators in obesity, inflammation and cancer.
PMID	PMID:36499652	5	26	3702	AT5G61270,AT3G59060,AT2G43010,AT5G67110,AT4G36930	BHLH72,PIF5,PIF4,ALC,SPT	6.07e-07	0.00084	(2022) Comprehensive Analysis of Betula platyphylla Suk. PIF Gene Family and Their Potential Functions in Growth and Development.
PMID	PMID:25191331	5	27	3702	AT5G03470,AT3G09880,AT1G13460,AT4G15415,AT3G21650	B'ALPHA,B'BETA,B'THETA,B'GAMMA,B'ZETA	7.17e-07	0.00098	(2014) Effects of light and the regulatory B-subunit composition of protein phosphatase 2A on the susceptibility of Arabidopsis thaliana to aphid (Myzus persicae) infestation.
PMID	PMID:23647236	4	10	3702	AT2G23430,AT2G32710,AT1G49620,AT5G48820	KRP1-2,KRP4,KRP7,KRP3	7.41e-07	0.001	(2013) Downregulation of multiple CDK inhibitor ICKKRP genes upregulates the E2F pathway and increases cell proliferation, and organ and seed sizes in Arabidopsis.
PMID	PMID:36982222	5	28	3702	AT5G03470,AT3G09880,AT1G13460,AT4G15415,AT3G21650	B'ALPHA,B'BETA,B'THETA,B'GAMMA,B'ZETA	8.41e-07	0.0011	(2023) B Regulatory Subunits of PP2A: Their Roles in Plant Development and Stress Reactions.
PMID	PMID:36835500	5	30	3702	AT2G44980,AT5G61270,AT3G59060,AT2G43010,AT5G66750	CHR10,BHLH72,PIF5,PIF4,DDM1	1.14e-06	0.0015	(2023) Genome-Wide Characterization of the PIFs Family in Sweet Potato and Functional Identification of IbPIF3.1 under Drought and Fusarium Wilt Stresses.
PMID	PMID:25450176	5	30	3702	AT4G19560,AT4G19600,AT1G27630,AT1G35440,AT5G45190	CYCT1-2,CYCT1-4,CYCT1-3,CYCT1-1,CYCT1-5	1.14e-06	0.0015	(2015) Prolyl isomerases in gene transcription.
PMID	PMID:37569631	5	31	3702	AT5G03470,AT3G09880,AT1G13460,AT4G15415,AT3G21650	B'ALPHA,B'BETA,B'THETA,B'GAMMA,B'ZETA	1.32e-06	0.0017	(2023) Distinct Clades of Protein Phosphatase 2A Regulatory BB56 Subunits Engage in Different Physiological Processes.
PMID	PMID:34742254	6	60	3702	AT3G02030,AT4G02120,AT1G30820,AT2G34890,AT4G20320,AT3G12670	F1C9.19,T10M13.13,T17H7.12,F19I3.12,F1C12.230,T2E22.2	1.44e-06	0.0018	(2021) Wheat transcriptome profiling reveals abscisic and gibberellic acid treatments regulate early-stage phytohormone defense signaling, cell wall fortification, and metabolic switches following Fusarium graminearum-challenge.
PMID	PMID:37686008	6	62	3702	AT1G07890,AT3G09640,AT5G61270,AT3G59060,AT2G43010,AT2G25490	APX1,APX2,BHLH72,PIF5,PIF4,EBF1	1.71e-06	0.0021	(2023) Functions of Plant Phytochrome Signaling Pathways in Adaptation to Diverse Stresses.
PMID	PMID:32652745	4	14	3702	AT5G61270,AT3G59060,AT2G43010,AT2G25490	BHLH72,PIF5,PIF4,EBF1	2.23e-06	0.0027	(2020) A COP1-PIF-HEC regulatory module fine-tunes photomorphogenesis in Arabidopsis.
PMID	PMID:24686568	4	14	3702	AT3G19150,AT2G32710,AT5G48820,AT3G24810	KRP6,KRP4,KRP3,KRP5	2.23e-06	0.0027	(2014) Salicylic acid antagonizes abscisic acid inhibition of shoot growth and cell cycle progression in rice.
PMID	PMID:22818915	4	14	3702	AT5G25350,AT3G59060,AT2G43010,AT2G25490	EBF2,PIF5,PIF4,EBF1	2.23e-06	0.0027	(2012) A molecular framework of light-controlled phytohormone action in Arabidopsis.
PMID	PMID:34326861	4	15	3702	AT2G44980,AT3G59060,AT2G43010,AT5G66750	CHR10,PIF5,PIF4,DDM1	2.81e-06	0.0033	(2021) Genome-Wide Identification of the Early Flowering 4 (ELF4) Gene Family in Cotton and Silent GhELF4-1 and GhEFL3-6 Decreased Cotton Stress Resistance.
PMID	PMID:25874869	6	68	3702	AT2G26650,AT5G61270,AT3G59060,AT2G25600,AT2G43010,AT4G32500	AKT1,BHLH72,PIF5,AKT6,PIF4,AKT5	2.83e-06	0.0033	(2015) Shade avoidance components and pathways in adult plants revealed by phenotypic profiling.
PMID	PMID:33034378	3	3	3702	AT5G61270,AT3G59060,AT2G43010	BHLH72,PIF5,PIF4	2.92e-06	0.0034	(2021) Reducing shade avoidance can improve Arabidopsis canopy performance against competitors.
PMID	PMID:29608565	5	37	3702	AT4G12480,AT4G12520,AT4G12500,AT4G12490,AT4G12470	EARLI1,T1P17.100,T1P17.90,T1P17.80,AZI1	2.9e-06	0.0034	(2018) Natural allelic variation of the AZI1 gene controls root growth under zinc-limiting condition.
PMID	PMID:27191168	5	37	3702	AT5G03470,AT3G09880,AT1G13460,AT4G15415,AT3G21650	B'ALPHA,B'BETA,B'THETA,B'GAMMA,B'ZETA	2.9e-06	0.0034	(2016) Direct and Indirect Targeting of PP2A by Conserved Bacterial Type-III Effector Proteins.
PMID	PMID:26193333	3	3	3702	AT5G61270,AT3G59060,AT2G43010	BHLH72,PIF5,PIF4	2.92e-06	0.0034	(2015) Insight into the mechanism of end-of-day far-red light (EODFR)-induced shade avoidance responses in Arabidopsis thaliana.
PMID	PMID:23435352	5	37	3702	AT5G61270,AT5G25350,AT3G59060,AT2G43010,AT2G25490	BHLH72,EBF2,PIF5,PIF4,EBF1	2.9e-06	0.0034	(2013) Circadian clock-regulated physiological outputs: dynamic responses in nature.
PMID	PMID:9128737	3	3	3702	AT5G03470,AT3G09880,AT4G15415	B'ALPHA,B'BETA,B'GAMMA	2.92e-06	0.0034	(1997) Differential expression of three Arabidopsis genes encoding the B regulatory subunit of protein phosphatase 2A.
PMID	PMID:34394163	4	16	3702	AT3G02030,AT5G61270,AT3G59060,AT2G43010	F1C9.19,BHLH72,PIF5,PIF4	3.5e-06	0.0038	(2021) Protein Kinase Activity of Phytochrome A Positively Correlates With Photoresponses in Arabidopsis.
PMID	PMID:33367238	4	16	3702	AT3G02030,AT5G61270,AT3G59060,AT2G43010	F1C9.19,BHLH72,PIF5,PIF4	3.5e-06	0.0038	(2020) Cryptochrome 1 Inhibits Shoot Branching by Repressing the Self-Activated Transciption Loop of PIF4 in Arabidopsis.
PMID	PMID:28262730	4	16	3702	AT2G23430,AT1G49620,AT5G48820,AT3G24810	KRP1-2,KRP7,KRP3,KRP5	3.5e-06	0.0038	(2017) Identification and functional analysis of the ICK gene family in maize.
PMID	PMID:35646023	6	74	3702	AT3G02030,AT4G02120,AT1G30820,AT2G34890,AT4G20320,AT3G12670	F1C9.19,T10M13.13,T17H7.12,F19I3.12,F1C12.230,T2E22.2	4.47e-06	0.0047	(2022) Label-Free Quantitative Proteomics Unravel the Impacts of Salt Stress on Dendrobium huoshanense.
PMID	PMID:36311124	5	41	3702	AT4G02120,AT1G30820,AT2G34890,AT4G20320,AT3G12670	T10M13.13,T17H7.12,F19I3.12,F1C12.230,T2E22.2	4.59e-06	0.0048	(2022) Integrated transcriptomics and miRNAomics provide insights into the complex multi-tiered regulatory networks associated with coleoptile senescence in rice.
PMID	PMID:32412656	3	4	3702	AT5G61270,AT3G59060,AT2G43010	BHLH72,PIF5,PIF4	5.1e-06	0.0052	(2020) Phytochrome-imposed inhibition of PIF7 activity shapes photoperiodic growth in Arabidopsis together with PIF1, 3, 4 and 5.
PMID	PMID:27889265	3	4	3702	AT5G61270,AT3G59060,AT2G43010	BHLH72,PIF5,PIF4	5.1e-06	0.0052	(2016) Integration of Phytochrome and Cryptochrome Signals Determines Plant Growth during Competition for Light.
PMID	PMID:26039486	3	4	3702	AT1G13460,AT4G15415,AT3G21650	B'THETA,B'GAMMA,B'ZETA	5.1e-06	0.0052	(2015) Protein phosphatase 2A regulatory subunits affecting plant innate immunity, energy metabolism, and flowering time--joint functions among Beta subfamily members.
PMID	PMID:22851763	3	4	3702	AT3G59060,AT2G43010,AT4G36930	PIF5,PIF4,SPT	5.1e-06	0.0052	(2012) A light-regulated genetic module was recruited to carpel development in Arabidopsis following a structural change to SPATULA.
PMID	PMID:19672620	3	4	3702	AT1G13460,AT4G15415,AT3G21650	B'THETA,B'GAMMA,B'ZETA	5.1e-06	0.0052	(2009) Diversity in subcellular targeting of the PP2A Beta subfamily members.
RCTM	MAP-1257604	9	92	3702	AT4G16810,AT3G13330,AT5G03470,AT3G09880,AT5G51230,AT1G13460,AT4G15415,AT4G16845,AT3G21650	Dl4430c,PA200,B'ALPHA,B'BETA,EMF2,B'THETA,B'GAMMA,VRN2,B'ZETA	3.7e-09	3.1e-06	PIP3 activates AKT signaling
RCTM	MAP-5683057	8	64	3702	AT3G03110,AT3G13330,AT5G03470,AT3G09880,AT1G13460,AT4G15415,AT3G21650,AT5G17020	XPO1B,PA200,B'ALPHA,B'BETA,B'THETA,B'GAMMA,B'ZETA,XPO1	4.78e-09	3.1e-06	MAPK family signaling cascades
RCTM	MAP-9006925	9	94	3702	AT4G16810,AT3G13330,AT5G03470,AT3G09880,AT5G51230,AT1G13460,AT4G15415,AT4G16845,AT3G21650	Dl4430c,PA200,B'ALPHA,B'BETA,EMF2,B'THETA,B'GAMMA,VRN2,B'ZETA	4.41e-09	3.1e-06	Intracellular signaling by second messengers
RCTM	MAP-2173796	5	13	3702	AT4G19560,AT4G19600,AT1G27630,AT1G35440,AT5G45190	CYCT1-2,CYCT1-4,CYCT1-3,CYCT1-1,CYCT1-5	3.24e-08	6.78e-06	SMAD2/SMAD3:SMAD4 heterotrimer regulates transcription
RCTM	MAP-389513	5	19	3702	AT5G03470,AT3G09880,AT1G13460,AT4G15415,AT3G21650	B'ALPHA,B'BETA,B'THETA,B'GAMMA,B'ZETA	1.57e-07	2.62e-05	CTLA4 inhibitory signaling
RCTM	MAP-388841	5	23	3702	AT5G03470,AT3G09880,AT1G13460,AT4G15415,AT3G21650	B'ALPHA,B'BETA,B'THETA,B'GAMMA,B'ZETA	3.56e-07	4.09e-05	Costimulation by the CD28 family
RCTM	MAP-418346	5	22	3702	AT5G03470,AT3G09880,AT1G13460,AT4G15415,AT3G21650	B'ALPHA,B'BETA,B'THETA,B'GAMMA,B'ZETA	2.94e-07	4.09e-05	Platelet homeostasis
RCTM	MAP-5673000	5	22	3702	AT5G03470,AT3G09880,AT1G13460,AT4G15415,AT3G21650	B'ALPHA,B'BETA,B'THETA,B'GAMMA,B'ZETA	2.94e-07	4.09e-05	RAF activation
RCTM	MAP-3214841	6	57	3702	AT4G16810,AT5G53430,AT5G51230,AT4G16845,AT3G61740,AT4G27910	Dl4430c,ATX5,EMF2,VRN2,ATX3,ATX4	1.09e-06	9.2e-05	PKMTs methylate histone lysines
RCTM	MAP-5673001	6	56	3702	AT3G13330,AT5G03470,AT3G09880,AT1G13460,AT4G15415,AT3G21650	PA200,B'ALPHA,B'BETA,B'THETA,B'GAMMA,B'ZETA	9.89e-07	9.2e-05	RAF/MAP kinase cascade
RCTM	MAP-5684996	6	56	3702	AT3G13330,AT5G03470,AT3G09880,AT1G13460,AT4G15415,AT3G21650	PA200,B'ALPHA,B'BETA,B'THETA,B'GAMMA,B'ZETA	9.89e-07	9.2e-05	MAPK1/MAPK3 signaling
RCTM	MAP-6811558	5	31	3702	AT5G03470,AT3G09880,AT1G13460,AT4G15415,AT3G21650	B'ALPHA,B'BETA,B'THETA,B'GAMMA,B'ZETA	1.32e-06	9.2e-05	PI5P, PP2A and IER3 Regulate PI3K/AKT Signaling
RCTM	MAP-5675221	5	34	3702	AT5G03470,AT3G09880,AT1G13460,AT4G15415,AT3G21650	B'ALPHA,B'BETA,B'THETA,B'GAMMA,B'ZETA	1.99e-06	0.00013	Negative regulation of MAPK pathway
RCTM	MAP-68877	7	106	3702	AT3G28925,AT5G03470,AT3G09880,AT1G13460,AT4G15415,AT5G48600,AT3G21650	F4J1Q3_ARATH,B'ALPHA,B'BETA,B'THETA,B'GAMMA,SMC4,B'ZETA	2.53e-06	0.00015	Mitotic Prometaphase
RCTM	MAP-199418	5	37	3702	AT5G03470,AT3G09880,AT1G13460,AT4G15415,AT3G21650	B'ALPHA,B'BETA,B'THETA,B'GAMMA,B'ZETA	2.9e-06	0.00016	Negative regulation of the PI3K/AKT network
RCTM	MAP-2173793	5	37	3702	AT4G19560,AT4G19600,AT1G27630,AT1G35440,AT5G45190	CYCT1-2,CYCT1-4,CYCT1-3,CYCT1-1,CYCT1-5	2.9e-06	0.00016	Transcriptional activity of SMAD2/SMAD3:SMAD4 heterotrimer
RCTM	MAP-170834	5	40	3702	AT4G19560,AT4G19600,AT1G27630,AT1G35440,AT5G45190	CYCT1-2,CYCT1-4,CYCT1-3,CYCT1-1,CYCT1-5	4.11e-06	0.0002	Signaling by TGF-beta Receptor Complex
RCTM	MAP-8983711	3	4	3702	AT4G19210,AT3G13640,AT4G30300	ABCE2,ABCE1,ABCE3	5.1e-06	0.00024	OAS antiviral response
RCTM	MAP-9006936	5	42	3702	AT4G19560,AT4G19600,AT1G27630,AT1G35440,AT5G45190	CYCT1-2,CYCT1-4,CYCT1-3,CYCT1-1,CYCT1-5	5.12e-06	0.00024	Signaling by TGFB family members
RCTM	MAP-212436	14	654	3702	AT4G16810,AT3G48070,AT4G19560,AT3G21060,AT4G19600,AT5G53430,AT5G51230,AT1G27630,AT4G16845,AT1G35440,AT5G45190,AT5G62910,AT3G61740,AT4G27910	Dl4430c,F4JCT1_ARATH,CYCT1-2,RBL-2,CYCT1-4,ATX5,EMF2,CYCT1-3,VRN2,CYCT1-1,CYCT1-5,MQB2.23,ATX3,ATX4	1.42e-05	0.0006	Generic Transcription Pathway
RCTM	MAP-69618	5	54	3702	AT5G03470,AT3G09880,AT1G13460,AT4G15415,AT3G21650	B'ALPHA,B'BETA,B'THETA,B'GAMMA,B'ZETA	1.59e-05	0.00063	Mitotic Spindle Checkpoint
RCTM	MAP-909733	3	7	3702	AT4G19210,AT3G13640,AT4G30300	ABCE2,ABCE1,ABCE3	1.73e-05	0.00066	Interferon alpha/beta signaling
RCTM	MAP-9648025	5	57	3702	AT5G03470,AT3G09880,AT1G13460,AT4G15415,AT3G21650	B'ALPHA,B'BETA,B'THETA,B'GAMMA,B'ZETA	2.03e-05	0.00074	EML4 and NUDC in mitotic spindle formation
RCTM	MAP-2467813	6	102	3702	AT3G13330,AT5G03470,AT3G09880,AT1G13460,AT4G15415,AT3G21650	PA200,B'ALPHA,B'BETA,B'THETA,B'GAMMA,B'ZETA	2.52e-05	0.00088	Separation of Sister Chromatids
RCTM	MAP-2500257	5	70	3702	AT5G03470,AT3G09880,AT1G13460,AT4G15415,AT3G21650	B'ALPHA,B'BETA,B'THETA,B'GAMMA,B'ZETA	5.11e-05	0.0017	Resolution of Sister Chromatid Cohesion
RCTM	MAP-162582	18	1162	3702	AT4G16810,AT3G03110,AT3G13330,AT5G03470,AT3G09880,AT4G19560,AT3G06830,AT4G19600,AT5G51230,AT1G27630,AT1G13460,AT4G15415,AT4G16845,AT1G35440,AT5G49180,AT5G45190,AT3G21650,AT5G17020	Dl4430c,XPO1B,PA200,B'ALPHA,B'BETA,CYCT1-2,PME23,CYCT1-4,EMF2,CYCT1-3,B'THETA,B'GAMMA,VRN2,CYCT1-1,PME58,CYCT1-5,B'ZETA,XPO1	5.88e-05	0.0019	Signal Transduction
RCTM	MAP-8943724	3	12	3702	AT4G16810,AT5G51230,AT4G16845	Dl4430c,EMF2,VRN2	6.42e-05	0.002	Regulation of PTEN gene transcription
RCTM	MAP-5687128	3	14	3702	AT3G03110,AT3G13330,AT5G17020	XPO1B,PA200,XPO1	9.52e-05	0.0028	MAPK6/MAPK4 signaling
RCTM	MAP-68886	8	259	3702	AT3G28925,AT3G13330,AT5G03470,AT3G09880,AT1G13460,AT4G15415,AT5G48600,AT3G21650	F4J1Q3_ARATH,PA200,B'ALPHA,B'BETA,B'THETA,B'GAMMA,SMC4,B'ZETA	9.64e-05	0.0028	M Phase
RCTM	MAP-1640170	12	606	3702	AT1G49250,AT1G04020,AT3G28925,AT3G13330,AT5G03470,AT3G09880,AT1G08130,AT1G13460,AT4G15415,AT4G21070,AT5G48600,AT3G21650	F13F21.31,BARD1,F4J1Q3_ARATH,PA200,B'ALPHA,B'BETA,LIG1,B'THETA,B'GAMMA,BRCA1,SMC4,B'ZETA	0.00012	0.0034	Cell Cycle
RCTM	MAP-499943	5	85	3702	AT4G02120,AT1G30820,AT2G34890,AT4G20320,AT3G12670	T10M13.13,T17H7.12,F19I3.12,F1C12.230,T2E22.2	0.00012	0.0034	Interconversion of nucleotide di- and triphosphates
RCTM	MAP-3247509	6	140	3702	AT4G16810,AT5G53430,AT5G51230,AT4G16845,AT3G61740,AT4G27910	Dl4430c,ATX5,EMF2,VRN2,ATX3,ATX4	0.00014	0.0035	Chromatin modifying enzymes
RCTM	MAP-4839726	6	140	3702	AT4G16810,AT5G53430,AT5G51230,AT4G16845,AT3G61740,AT4G27910	Dl4430c,ATX5,EMF2,VRN2,ATX3,ATX4	0.00014	0.0035	Chromatin organization
RCTM	MAP-195721	5	91	3702	AT5G03470,AT3G09880,AT1G13460,AT4G15415,AT3G21650	B'ALPHA,B'BETA,B'THETA,B'GAMMA,B'ZETA	0.00017	0.0039	Signaling by WNT
RCTM	MAP-6807505	5	90	3702	AT4G19560,AT4G19600,AT1G27630,AT1G35440,AT5G45190	CYCT1-2,CYCT1-4,CYCT1-3,CYCT1-1,CYCT1-5	0.00016	0.0039	RNA polymerase II transcribes snRNA genes
RCTM	MAP-8953750	3	17	3702	AT4G16810,AT5G51230,AT4G16845	Dl4430c,EMF2,VRN2	0.00016	0.0039	Transcriptional Regulation by E2F6
RCTM	MAP-6807070	4	53	3702	AT4G16810,AT3G13330,AT5G51230,AT4G16845	Dl4430c,PA200,EMF2,VRN2	0.00024	0.0055	PTEN Regulation
RCTM	MAP-1169410	3	21	3702	AT4G19210,AT3G13640,AT4G30300	ABCE2,ABCE1,ABCE3	0.00028	0.0061	Antiviral mechanism by IFN-stimulated genes
RCTM	MAP-2555396	6	166	3702	AT3G13330,AT5G03470,AT3G09880,AT1G13460,AT4G15415,AT3G21650	PA200,B'ALPHA,B'BETA,B'THETA,B'GAMMA,B'ZETA	0.00033	0.007	Mitotic Metaphase and Anaphase
RCTM	MAP-68882	6	166	3702	AT3G13330,AT5G03470,AT3G09880,AT1G13460,AT4G15415,AT3G21650	PA200,B'ALPHA,B'BETA,B'THETA,B'GAMMA,B'ZETA	0.00033	0.007	Mitotic Anaphase
RCTM	MAP-75955	5	108	3702	AT4G19560,AT4G19600,AT1G27630,AT1G35440,AT5G45190	CYCT1-2,CYCT1-4,CYCT1-3,CYCT1-1,CYCT1-5	0.00035	0.0072	RNA Polymerase II Transcription Elongation
RCTM	MAP-69278	10	502	3702	AT1G49250,AT3G28925,AT3G13330,AT5G03470,AT3G09880,AT1G08130,AT1G13460,AT4G15415,AT5G48600,AT3G21650	F13F21.31,F4J1Q3_ARATH,PA200,B'ALPHA,B'BETA,LIG1,B'THETA,B'GAMMA,SMC4,B'ZETA	0.00043	0.0087	Cell Cycle, Mitotic
RCTM	MAP-6796648	5	121	3702	AT4G19560,AT4G19600,AT1G27630,AT1G35440,AT5G45190	CYCT1-2,CYCT1-4,CYCT1-3,CYCT1-1,CYCT1-5	0.00058	0.0113	TP53 Regulates Transcription of DNA Repair Genes
RCTM	MAP-913531	3	28	3702	AT4G19210,AT3G13640,AT4G30300	ABCE2,ABCE1,ABCE3	0.0006	0.0113	Interferon Signaling
RCTM	MAP-73857	14	952	3702	AT4G16810,AT3G48070,AT4G19560,AT3G21060,AT4G19600,AT5G53430,AT5G51230,AT1G27630,AT4G16845,AT1G35440,AT5G45190,AT5G62910,AT3G61740,AT4G27910	Dl4430c,F4JCT1_ARATH,CYCT1-2,RBL-2,CYCT1-4,ATX5,EMF2,CYCT1-3,VRN2,CYCT1-1,CYCT1-5,MQB2.23,ATX3,ATX4	0.00067	0.0125	RNA Polymerase II Transcription
RCTM	MAP-69620	6	210	3702	AT3G13330,AT5G03470,AT3G09880,AT1G13460,AT4G15415,AT3G21650	PA200,B'ALPHA,B'BETA,B'THETA,B'GAMMA,B'ZETA	0.0011	0.0197	Cell Cycle Checkpoints
RCTM	MAP-1296071	3	37	3702	AT2G26650,AT2G25600,AT4G32500	AKT1,AKT6,AKT5	0.0013	0.0225	Potassium Channels
RCTM	MAP-674695	5	146	3702	AT4G19560,AT4G19600,AT1G27630,AT1G35440,AT5G45190	CYCT1-2,CYCT1-4,CYCT1-3,CYCT1-1,CYCT1-5	0.0013	0.0229	RNA Polymerase II Pre-transcription Events
RCTM	MAP-195258	5	158	3702	AT5G03470,AT3G09880,AT1G13460,AT4G15415,AT3G21650	B'ALPHA,B'BETA,B'THETA,B'GAMMA,B'ZETA	0.0018	0.0314	RHO GTPase Effectors
RCTM	MAP-74160	15	1200	3702	AT4G16810,AT3G48070,AT2G47420,AT4G19560,AT3G21060,AT4G19600,AT5G53430,AT5G51230,AT1G27630,AT4G16845,AT1G35440,AT5G45190,AT5G62910,AT3G61740,AT4G27910	Dl4430c,F4JCT1_ARATH,DIM1A,CYCT1-2,RBL-2,CYCT1-4,ATX5,EMF2,CYCT1-3,VRN2,CYCT1-1,CYCT1-5,MQB2.23,ATX3,ATX4	0.0021	0.0358	Gene expression (Transcription)
RCTM	MAP-2559580	3	46	3702	AT4G16810,AT5G51230,AT4G16845	Dl4430c,EMF2,VRN2	0.0023	0.0374	Oxidative Stress Induced Senescence
WikiPathways	WP3662	3	22	3702	AT5G61270,AT3G59060,AT2G43010	BHLH72,PIF5,PIF4	0.00031	0.0072	Phytochrome signaling pathway to turn on photomorphogenesis
NetworkNeighborAL	CL:14440	5	11	3702	AT4G19560,AT4G19600,AT1G27630,AT1G35440,AT5G45190	CYCT1-2,CYCT1-4,CYCT1-3,CYCT1-1,CYCT1-5	1.66e-08	4.85e-05	Nuclear cyclin-dependent protein kinase holoenzyme complex, and Phosphorylation of RNA polymerase II C-terminal domain
NetworkNeighborAL	CL:9109	7	43	3702	AT2G46740,AT1G07890,AT2G46750,AT1G32300,AT5G56490,AT5G56470,AT5G11540	GULLO5,APX1,GULLO2,GULLO1,GULLO4,GULLO7,GULLO3	8.66e-09	4.85e-05	Ascorbate and aldarate metabolism, and Phospholipid-hydroperoxide glutathione peroxidase activity
NetworkNeighborAL	CL:37635	5	16	3702	AT3G19150,AT2G32710,AT1G49620,AT5G48820,AT3G24810	KRP6,KRP4,KRP7,KRP3,KRP5	7.59e-08	0.00014	Mixed, incl. Cyclin-dependent kinase inhibitor, and MIP18 family
NetworkNeighborAL	CL:9111	6	37	3702	AT2G46740,AT1G07890,AT2G46750,AT1G32300,AT5G56490,AT5G11540	GULLO5,APX1,GULLO2,GULLO1,GULLO4,GULLO3	1.07e-07	0.00014	Ascorbate and aldarate metabolism
NetworkNeighborAL	CL:14444	4	6	3702	AT4G19600,AT1G27630,AT1G35440,AT5G45190	CYCT1-4,CYCT1-3,CYCT1-1,CYCT1-5	1.58e-07	0.00015	Nuclear cyclin-dependent protein kinase holoenzyme complex, and Regulation of viral process
NetworkNeighborAL	CL:8020	4	11	3702	AT4G02120,AT1G30820,AT2G34890,AT3G12670	T10M13.13,T17H7.12,F19I3.12,T2E22.2	1.01e-06	0.0007	Mixed, incl. CTP synthase, and C2 domain
NetworkNeighborAL	CL:30524	5	30	3702	AT2G47030,AT5G27870,AT3G62170,AT2G26450,AT3G05610	PME4,PME28,VGDH2,PME13,PME21	1.14e-06	0.00071	Mixed, incl. Pectate lyase, N-terminal, and Pectinesterase
NetworkNeighborAL	CL:13451	4	12	3702	AT3G21060,AT5G53430,AT3G61740,AT4G27910	RBL-2,ATX5,ATX3,ATX4	1.34e-06	0.00075	Set1C/COMPASS complex
NetworkNeighborAL	CL:20247	4	17	3702	AT5G03470,AT3G09880,AT4G15415,AT3G21650	B'ALPHA,B'BETA,B'GAMMA,B'ZETA	4.3e-06	0.0022	Protein phosphatase type 2A complex
NetworkNeighborAL	CL:13454	3	6	3702	AT3G21060,AT3G61740,AT4G27910	RBL-2,ATX3,ATX4	1.21e-05	0.0052	Set1C/COMPASS complex
NetworkNeighborAL	CL:18243	3	6	3702	AT3G02030,AT5G41130,AT3G26820	F1C9.19,MEE6.20,F4JDQ6_ARATH	1.21e-05	0.0052	Diacylglycerol acyltransferase, and Acyl-CoA desaturase
NetworkNeighborAL	CL:11555	4	37	3702	AT3G28925,AT3G20760,AT1G51130,AT5G48600	F4J1Q3_ARATH,NSE4B,NSE4A,SMC4	6.7e-05	0.0171	Mixed, incl. Mitotic Telophase/Cytokinesis, and DNA condensation
NetworkNeighborAL	CL:36122	4	40	3702	AT3G22120,AT4G12480,AT4G12500,AT4G12470	CWLP,EARLI1,T1P17.90,AZI1	8.87e-05	0.0216	Mixed, incl. Bifunctional inhibitor/plant lipid transfer protein/seed storage helical domain superfamily, and Dirigent protein
NetworkNeighborAL	CL:13232	6	136	3702	AT3G21060,AT5G53430,AT5G51230,AT4G16845,AT3G61740,AT4G27910	RBL-2,ATX5,EMF2,VRN2,ATX3,ATX4	0.00012	0.026	Chromatin regulator, and Nucleosome core
NetworkNeighborAL	CL:36374	4	44	3702	AT1G12090,AT2G45180,AT2G10940,AT1G62510	ELP,F4L23.31,F15K19.1,T3P18.7	0.00013	0.027	Mixed, incl. Plant lipid transfer protein / seed storage protein / trypsin-alpha amylase inhibitor domain family, and Early nodulin-like protein domain
NetworkNeighborAL	CL:30518	6	154	3702	AT2G47030,AT5G27870,AT3G62170,AT2G47040,AT2G26450,AT3G05610	PME4,PME28,VGDH2,PME5,PME13,PME21	0.00022	0.0389	Mixed, incl. Invertase/pectin methylesterase inhibitor domain superfamily, and Pectin lyase fold
NetworkNeighborAL	CL:36376	3	20	3702	AT2G45180,AT2G10940,AT1G62510	F4L23.31,F15K19.1,T3P18.7	0.00024	0.0411	Mixed, incl. Hydrophobic seed protein domain, and Phloem protein 2
NetworkNeighborAL	CL:9114	3	21	3702	AT2G46740,AT1G07890,AT1G32300	GULLO5,APX1,GULLO1	0.00028	0.0441	Ascorbate and aldarate metabolism
NetworkNeighborAL	CL:30525	3	22	3702	AT5G27870,AT2G26450,AT3G05610	PME28,PME13,PME21	0.00031	0.0486	Mixed, incl. ANTH domain superfamily, and Pectate lyase, N-terminal

## Sheet: Table S3
Table S3. Enrcihment obtained from A. thaliana genes inside orthogroups with lower scaled Tajima’s D in terrestrial plants.
category	term	number_of_genes	number_of_genes_in_background	ncbiTaxonId	inputGenes	preferredNames	p_value	fdr	description
COMPARTMENTS	GOCC:0000159	4	18	3702	AT5G28850,AT1G03960,AT5G28900,AT1G54450	B''BETA,B''EPSILON,B''GAMMA,B''DELTA	6.96e-06	0.0075	Protein phosphatase type 2A complex
COMPARTMENTS	GOCC:0005963	4	20	3702	AT5G28850,AT1G03960,AT5G28900,AT1G54450	B''BETA,B''EPSILON,B''GAMMA,B''DELTA	1e-05	0.0075	Magnesium-dependent protein serine/threonine phosphatase complex
COMPARTMENTS	GOCC:0008287	5	38	3702	AT5G28850,AT1G03960,AT5G28900,AT3G46220,AT1G54450	B''BETA,B''EPSILON,B''GAMMA,F12M12.190,B''DELTA	4.64e-06	0.0075	Protein serine/threonine phosphatase complex
COMPARTMENTS	GOCC:1990316	3	8	3702	AT3G18770,AT2G31260,AT3G49590	ATG13B,ATG9,ATG13A	2.93e-05	0.0094	Atg1/ULK1 kinase complex
Process	GO:0006470	9	135	3702	AT3G44620,AT5G28850,AT1G03960,AT5G10740,AT4G31750,AT1G43900,AT5G28900,AT5G53140,AT1G54450	F4J355_ARATH,B''BETA,B''EPSILON,MAJ23.3,WIN2,F28H19.16,B''GAMMA,MFH8.8,B''DELTA	1.54e-07	0.00088	Protein dephosphorylation
Process	GO:0008104	20	923	3702	AT3G50380,AT1G48090,AT1G12930,AT2G05120,AT3G18770,AT3G48620,AT3G19190,AT5G42080,AT3G26935,AT3G44160,AT2G31260,AT3G49870,AT5G37680,AT5G67560,AT1G48760,AT1G33410,AT5G41060,AT3G04460,AT3G49590,AT2G17980	A0A1I9LQ65,A0A1P8AMQ1,F13K23.18,NUP133,ATG13B,P36,ATG2,DRP1A,PAT07,P39,ATG9,ARL8A,ARL8C,ARL8B,DELTA-ADR,NUP160,PAT06,PEX12,ATG13A,SLY1	4.89e-07	0.00094	Protein localization
Process	GO:0015031	19	814	3702	AT3G50380,AT1G48090,AT1G12930,AT2G05120,AT3G18770,AT3G48620,AT3G19190,AT5G42080,AT3G26935,AT3G44160,AT3G49870,AT5G37680,AT5G67560,AT1G48760,AT1G33410,AT5G41060,AT3G04460,AT3G49590,AT2G17980	A0A1I9LQ65,A0A1P8AMQ1,F13K23.18,NUP133,ATG13B,P36,ATG2,DRP1A,PAT07,P39,ARL8A,ARL8C,ARL8B,DELTA-ADR,NUP160,PAT06,PEX12,ATG13A,SLY1	3.25e-07	0.00094	Protein transport
Process	GO:0051641	23	1173	3702	AT3G50380,AT1G48090,AT1G12930,AT2G05120,AT3G18770,AT3G48620,AT3G19190,AT5G42080,AT3G26935,AT3G44160,AT2G19560,AT1G24560,AT2G31260,AT3G49870,AT5G37680,AT5G67560,AT1G48760,AT1G33410,AT5G41060,AT5G13530,AT3G04460,AT3G49590,AT2G17980	A0A1I9LQ65,A0A1P8AMQ1,F13K23.18,NUP133,ATG13B,P36,ATG2,DRP1A,PAT07,P39,EER5,F21J9.22,ATG9,ARL8A,ARL8C,ARL8B,DELTA-ADR,NUP160,PAT06,KEG,PEX12,ATG13A,SLY1	3.53e-07	0.00094	Cellular localization
Process	GO:0043412	39	3138	3702	AT3G01380,AT5G62230,AT3G44620,AT4G33565,AT4G17905,AT3G26935,AT2G26330,AT5G28850,AT5G07180,AT1G03960,AT1G16570,AT5G10740,AT1G72220,AT5G28290,AT3G63280,AT4G31750,AT2G30880,AT4G00330,AT1G43900,AT5G28900,AT2G19870,AT3G56120,AT5G53140,AT3G04810,AT5G58940,AT5G41060,AT5G13530,AT5G17600,AT5G15810,AT3G21530,AT3G46220,AT5G10380,AT3G04460,AT3G01460,AT1G54510,AT1G54450,AT3G03550,AT3G02320,AT2G48030	T13O15.2,ERL1,F4J355_ARATH,F4JJ02_ARATH,ATL53,PAT07,ERECTA,B''BETA,ERL2,B''EPSILON,TUN,MAJ23.3,ATL54,NEK3,NEK4,WIN2,SWAP70,CRCK2,F28H19.16,B''GAMMA,F6F22.10,F18O21_80,MFH8.8,NEK2,CRCK1,PAT06,KEG,ATL52,F14F8_190,Q9LVF3_ARATH,F12M12.190,ATL55,PEX12,MBD9,NEK1,B''DELTA,ATL51,F11A12.1,T9J23.18	2.77e-06	0.002	Macromolecule modification
Process	GO:0019419	3	3	3702	AT4G04610,AT4G21990,AT1G62180	APR1,APR3,APR2	3.63e-06	0.0023	Sulfate reduction
Process	GO:0044804	4	16	3702	AT3G18770,AT3G19190,AT2G31260,AT3G49590	ATG13B,ATG2,ATG9,ATG13A	4.65e-06	0.0027	Autophagy of nucleus
Process	GO:0046907	16	722	3702	AT3G50380,AT1G48090,AT1G12930,AT2G05120,AT3G48620,AT5G42080,AT3G26935,AT3G44160,AT2G19560,AT1G24560,AT1G48760,AT1G33410,AT5G41060,AT5G13530,AT3G04460,AT2G17980	A0A1I9LQ65,A0A1P8AMQ1,F13K23.18,NUP133,P36,DRP1A,PAT07,P39,EER5,F21J9.22,DELTA-ADR,NUP160,PAT06,KEG,PEX12,SLY1	5.58e-06	0.0029	Intracellular transport
Process	GO:0055073	3	4	3702	AT1G22990,AT1G71050,AT5G17450	HIPP22,HIPP20,HIPP21	6.32e-06	0.003	Cadmium ion homeostasis
Process	GO:0000422	4	18	3702	AT3G18770,AT3G19190,AT2G31260,AT3G49590	ATG13B,ATG2,ATG9,ATG13A	6.96e-06	0.0031	Autophagy of mitochondrion
Process	GO:0006004	5	44	3702	AT2G28100,AT5G35570,AT5G01100,AT3G54100,AT2G37980	FUC1,OFUT35,FRB1,OFUT28,OFUT19	8.95e-06	0.0031	Fucose metabolic process
Process	GO:0033036	21	1205	3702	AT3G50380,AT1G48090,AT1G12930,AT2G05120,AT3G18770,AT3G48620,AT3G19190,AT5G42080,AT3G26935,AT3G44160,AT2G19560,AT2G31260,AT3G49870,AT5G37680,AT5G67560,AT1G48760,AT1G33410,AT5G41060,AT3G04460,AT3G49590,AT2G17980	A0A1I9LQ65,A0A1P8AMQ1,F13K23.18,NUP133,ATG13B,P36,ATG2,DRP1A,PAT07,P39,EER5,ATG9,ARL8A,ARL8C,ARL8B,DELTA-ADR,NUP160,PAT06,PEX12,ATG13A,SLY1	7.25e-06	0.0031	Macromolecule localization
Process	GO:0036211	35	2780	3702	AT3G01380,AT5G62230,AT3G44620,AT4G33565,AT4G17905,AT3G26935,AT2G26330,AT5G28850,AT5G07180,AT1G03960,AT1G16570,AT5G10740,AT1G72220,AT5G28290,AT3G63280,AT4G31750,AT2G30880,AT4G00330,AT1G43900,AT5G28900,AT5G53140,AT3G04810,AT5G58940,AT5G41060,AT5G13530,AT5G17600,AT3G21530,AT3G46220,AT5G10380,AT3G04460,AT3G01460,AT1G54510,AT1G54450,AT3G03550,AT2G48030	T13O15.2,ERL1,F4J355_ARATH,F4JJ02_ARATH,ATL53,PAT07,ERECTA,B''BETA,ERL2,B''EPSILON,TUN,MAJ23.3,ATL54,NEK3,NEK4,WIN2,SWAP70,CRCK2,F28H19.16,B''GAMMA,MFH8.8,NEK2,CRCK1,PAT06,KEG,ATL52,Q9LVF3_ARATH,F12M12.190,ATL55,PEX12,MBD9,NEK1,B''DELTA,ATL51,T9J23.18	7.82e-06	0.0031	Protein modification process
Process	GO:0061912	3	5	3702	AT3G18770,AT3G19190,AT3G49590	ATG13B,ATG2,ATG13A	1.01e-05	0.0032	Selective autophagy
Process	GO:0071705	20	1157	3702	AT3G50380,AT1G48090,AT1G12930,AT2G05120,AT3G18770,AT3G48620,AT3G19190,AT5G42080,AT3G26935,AT3G44160,AT2G19560,AT3G49870,AT5G37680,AT5G67560,AT1G48760,AT1G33410,AT5G41060,AT3G04460,AT3G49590,AT2G17980	A0A1I9LQ65,A0A1P8AMQ1,F13K23.18,NUP133,ATG13B,P36,ATG2,DRP1A,PAT07,P39,EER5,ARL8A,ARL8C,ARL8B,DELTA-ADR,NUP160,PAT06,PEX12,ATG13A,SLY1	1.37e-05	0.0039	Nitrogen compound transport
Process	GO:0034727	3	6	3702	AT3G18770,AT3G19190,AT3G49590	ATG13B,ATG2,ATG13A	1.5e-05	0.0041	Piecemeal microautophagy of the nucleus
Process	GO:0000045	4	27	3702	AT3G18770,AT3G19190,AT2G31260,AT3G49590	ATG13B,ATG2,ATG9,ATG13A	2.88e-05	0.0072	Autophagosome assembly
Process	GO:0046467	6	98	3702	AT3G01380,AT2G29525,AT3G21530,AT3G54020,AT2G37940,AT2G48030	T13O15.2,IPCS3,Q9LVF3_ARATH,IPCS1,IPCS2,T9J23.18	3.05e-05	0.0072	Membrane lipid biosynthetic process
Process	GO:0071585	3	8	3702	AT1G22990,AT1G71050,AT5G17450	HIPP22,HIPP20,HIPP21	2.93e-05	0.0072	Detoxification of cadmium ion
Process	GO:2000779	3	8	3702	AT5G55660,AT3G48710,AT4G26630	MDF20.10,T8P19.220,DEK3	2.93e-05	0.0072	Regulation of double-strand break repair
Process	GO:0034497	3	9	3702	AT3G18770,AT2G31260,AT3G49590	ATG13B,ATG9,ATG13A	3.89e-05	0.0083	Protein localization to phagophore assembly site
Process	GO:0006886	12	504	3702	AT3G50380,AT1G48090,AT1G12930,AT2G05120,AT3G48620,AT5G42080,AT3G26935,AT3G44160,AT1G48760,AT5G41060,AT3G04460,AT2G17980	A0A1I9LQ65,A0A1P8AMQ1,F13K23.18,NUP133,P36,DRP1A,PAT07,P39,DELTA-ADR,PAT06,PEX12,SLY1	4.45e-05	0.0092	Intracellular protein transport
Process	GO:0007033	5	64	3702	AT3G18770,AT3G19190,AT2G31260,AT1G48760,AT3G49590	ATG13B,ATG2,ATG9,DELTA-ADR,ATG13A	4.81e-05	0.0093	Vacuole organization
Process	GO:0006796	27	2064	3702	AT3G01380,AT5G62230,AT3G44620,AT2G39800,AT3G55610,AT2G26330,AT5G28850,AT5G07180,AT1G03960,AT2G23420,AT5G10740,AT4G36940,AT5G28290,AT3G63280,AT4G31750,AT2G30880,AT4G00330,AT1G43900,AT5G28900,AT5G53140,AT3G04810,AT5G58940,AT5G13530,AT3G21530,AT1G54510,AT1G54450,AT2G48030	T13O15.2,ERL1,F4J355_ARATH,P5CSA,P5CSB,ERECTA,B''BETA,ERL2,B''EPSILON,NAPRT2,MAJ23.3,NAPRT1,NEK3,NEK4,WIN2,SWAP70,CRCK2,F28H19.16,B''GAMMA,MFH8.8,NEK2,CRCK1,KEG,Q9LVF3_ARATH,NEK1,B''DELTA,T9J23.18	5.49e-05	0.0099	Phosphate-containing compound metabolic process
Process	GO:0006497	5	69	3702	AT3G01380,AT3G26935,AT5G41060,AT3G21530,AT2G48030	T13O15.2,PAT07,PAT06,Q9LVF3_ARATH,T9J23.18	6.74e-05	0.0111	Protein lipidation
Process	GO:0006605	8	230	3702	AT3G50380,AT1G48090,AT3G48620,AT3G26935,AT3G44160,AT1G48760,AT5G41060,AT3G04460	A0A1I9LQ65,A0A1P8AMQ1,P36,PAT07,P39,DELTA-ADR,PAT06,PEX12	7.17e-05	0.0112	Protein targeting
Process	GO:0016973	3	13	3702	AT2G05120,AT2G19560,AT1G33410	NUP133,EER5,NUP160	9.74e-05	0.0134	poly(A)+ mRNA export from nucleus
Process	GO:0008152	82	10167	3702	AT3G01380,AT1G05120,AT5G62230,AT2G05120,AT3G44620,AT3G57790,AT3G18770,AT3G13330,AT4G03200,AT4G33565,AT3G19190,AT4G37070,AT4G37060,AT4G37050,AT2G26560,AT1G67740,AT4G17905,AT2G39800,AT3G55610,AT4G04610,AT4G21990,AT1G62180,AT3G26935,AT3G60370,AT2G26330,AT2G29525,AT5G28850,AT5G07180,AT5G01630,AT4G00020,AT1G03960,AT1G61150,AT2G23420,AT2G28100,AT2G19560,AT1G16570,AT5G10740,AT1G72220,AT2G30200,AT2G31260…	T13O15.2,A0A1P8AWF9,ERL1,NUP133,F4J355_ARATH,F4J3I0_ARATH,ATG13B,PA200,F4C21.12,F4JJ02_ARATH,ATG2,PLP1,PLP5,PLP3,PLP2,PSBY,ATL53,P5CSA,P5CSB,APR1,APR3,APR2,PAT07,FKBP20-2,ERECTA,IPCS3,B''BETA,ERL2,BRCA2B,BRCA2A,B''EPSILON,GID8,NAPRT2,FUC1,EER5,TUN,MAJ23.3,ATL54,EMB3147,ATG9,NAPRT1,NEK3,NEK4,WIN2,SWAP70,CRCK2,F28H19.16,B''GAMMA,F6F22.10,F18O21_80,MFH8.8,OFUT35,NUP160,NEK2,RH32,CRCK1,PLP4,MNC6.8,PA…	0.0001	0.0137	Metabolic process
Process	GO:0071702	21	1449	3702	AT3G50380,AT1G48090,AT1G12930,AT2G05120,AT3G18770,AT3G48620,AT3G19190,AT5G42080,AT3G26935,AT3G44160,AT2G19560,AT2G31260,AT3G49870,AT5G37680,AT5G67560,AT1G48760,AT1G33410,AT5G41060,AT3G04460,AT3G49590,AT2G17980	A0A1I9LQ65,A0A1P8AMQ1,F13K23.18,NUP133,ATG13B,P36,ATG2,DRP1A,PAT07,P39,EER5,ATG9,ARL8A,ARL8C,ARL8B,DELTA-ADR,NUP160,PAT06,PEX12,ATG13A,SLY1	0.0001	0.0137	Organic substance transport
Process	GO:0046513	3	15	3702	AT2G29525,AT3G54020,AT2G37940	IPCS3,IPCS1,IPCS2	0.00014	0.018	Ceramide biosynthetic process
Process	GO:0007005	7	191	3702	AT3G18770,AT3G48620,AT3G19190,AT3G44160,AT1G14830,AT2G31260,AT3G49590	ATG13B,P36,ATG2,P39,DRP1C,ATG9,ATG13A	0.00015	0.0188	Mitochondrion organization
Process	GO:0000423	2	2	3702	AT3G18770,AT3G49590	ATG13B,ATG13A	0.00019	0.0237	Mitophagy
Process	GO:0034355	2	2	3702	AT2G23420,AT4G36940	NAPRT2,NAPRT1	0.00019	0.0237	NAD salvage
Process	GO:0072594	8	273	3702	AT3G50380,AT1G48090,AT1G12930,AT2G05120,AT3G48620,AT3G44160,AT1G48760,AT3G04460	A0A1I9LQ65,A0A1P8AMQ1,F13K23.18,NUP133,P36,P39,DELTA-ADR,PEX12	0.00022	0.0264	Establishment of protein localization to organelle
Process	GO:0000103	3	21	3702	AT4G04610,AT4G21990,AT1G62180	APR1,APR3,APR2	0.00034	0.0363	Sulfate assimilation
Process	GO:0002940	2	3	3702	AT5G15810,AT3G02320	F14F8_190,F11A12.1	0.00032	0.0363	tRNA N2-guanine methylation
Process	GO:0055129	2	3	3702	AT2G39800,AT3G55610	P5CSA,P5CSB	0.00032	0.0363	L-proline biosynthetic process
Process	GO:0007034	5	103	3702	AT3G50380,AT1G48090,AT1G24560,AT1G48760,AT5G13530	A0A1I9LQ65,A0A1P8AMQ1,F21J9.22,DELTA-ADR,KEG	0.0004	0.0418	Vacuolar transport
Process	GO:0044238	70	8604	3702	AT3G01380,AT1G05120,AT5G62230,AT3G44620,AT3G57790,AT3G13330,AT4G03200,AT4G33565,AT4G37070,AT4G37060,AT4G37050,AT2G26560,AT4G17905,AT2G39800,AT3G55610,AT4G04610,AT4G21990,AT1G62180,AT3G26935,AT2G26330,AT2G29525,AT5G28850,AT5G07180,AT5G01630,AT4G00020,AT1G03960,AT1G61150,AT2G23420,AT2G28100,AT2G19560,AT1G16570,AT5G10740,AT1G72220,AT2G30200,AT4G36940,AT5G28290,AT3G63280,AT4G31750,AT2G30880,AT4G00330…	T13O15.2,A0A1P8AWF9,ERL1,F4J355_ARATH,F4J3I0_ARATH,PA200,F4C21.12,F4JJ02_ARATH,PLP1,PLP5,PLP3,PLP2,ATL53,P5CSA,P5CSB,APR1,APR3,APR2,PAT07,ERECTA,IPCS3,B''BETA,ERL2,BRCA2B,BRCA2A,B''EPSILON,GID8,NAPRT2,FUC1,EER5,TUN,MAJ23.3,ATL54,EMB3147,NAPRT1,NEK3,NEK4,WIN2,SWAP70,CRCK2,F28H19.16,B''GAMMA,F6F22.10,F18O21_80,MFH8.8,OFUT35,NEK2,RH32,CRCK1,PLP4,PAT06,KEG,ATL52,FRB1,F14F8_190,Q9LVF3_ARATH,F12M12.190…	0.00043	0.0446	Primary metabolic process
Process	GO:0044805	2	4	3702	AT3G19190,AT2G31260	ATG2,ATG9	0.00048	0.0486	Late nucleophagy
Process	GO:0080157	2	4	3702	AT5G42080,AT5G01100	DRP1A,FRB1	0.00048	0.0486	Regulation of plant-type cell wall organization or biogenesis
Component	GO:0015630	11	306	3702	AT5G42080,AT3G61760,AT1G14830,AT5G28290,AT2G44590,AT3G49870,AT5G37680,AT5G67560,AT3G04810,AT3G60190,AT1G54510	DRP1A,DRP1B,DRP1C,NEK3,DRP1D,ARL8A,ARL8C,ARL8B,NEK2,DRP1E,NEK1	2.3e-06	0.0023	Microtubule cytoskeleton
Component	GO:0000159	4	23	3702	AT5G28850,AT1G03960,AT5G28900,AT1G54450	B''BETA,B''EPSILON,B''GAMMA,B''DELTA	1.63e-05	0.007	Protein phosphatase type 2A complex
Component	GO:0000407	4	22	3702	AT3G18770,AT3G19190,AT2G31260,AT3G49590	ATG13B,ATG2,ATG9,ATG13A	1.4e-05	0.007	Phagophore assembly site
Component	GO:0005874	8	240	3702	AT5G42080,AT3G61760,AT1G14830,AT5G28290,AT2G44590,AT3G04810,AT3G60190,AT1G54510	DRP1A,DRP1B,DRP1C,NEK3,DRP1D,NEK2,DRP1E,NEK1	9.54e-05	0.012	Microtubule
Component	GO:0005622	106	14335	3702	AT3G01380,AT1G05120,AT2G34560,AT1G12930,AT1G71000,AT2G05120,AT3G44620,AT3G57790,AT3G18770,AT3G13330,AT3G48620,AT4G03200,AT4G10070,AT4G37780,AT4G39420,AT5G55660,AT5G39960,AT3G19190,AT2G23320,AT4G37070,AT4G37050,AT2G26560,AT1G67740,AT5G65790,AT2G25970,AT5G42080,AT2G39800,AT3G55610,AT4G04610,AT4G21990,AT1G62180,AT1G33680,AT3G26935,AT3G60370,AT2G26330,AT2G29525,AT3G44160,AT5G01630,AT1G55930,AT1G61150…	T13O15.2,A0A1P8AWF9,CCP1,F13K23.18,F15H11.19,NUP133,F4J355_ARATH,F4J3I0_ARATH,ATG13B,PA200,P36,F4C21.12,F28M11.1,MYB87,F23K16.50,MDF20.10,MYH19.120,ATG2,WRKY15,PLP1,PLP3,PLP2,PSBY,F6H11.100,F17H15.1,DRP1A,P5CSA,P5CSB,APR1,APR3,APR2,F14M2.18,PAT07,FKBP20-2,ERECTA,IPCS3,P39,BRCA2B,CBSDUFCH2,GID8,NAPRT2,DRP1B,FUC1,EER5,TUN,DRP1C,F21J9.22,EMB3147,ATG9,NAPRT1,NEK3,DRP1D,ARL8A,CRCK2,B''GAMMA,F6F22.10,A…	0.00011	0.0122	Intracellular anatomical structure
Component	GO:0005737	83	10408	3702	AT3G01380,AT2G34560,AT1G12930,AT1G71000,AT3G44620,AT3G57790,AT3G18770,AT3G13330,AT3G48620,AT4G03200,AT4G10070,AT4G39420,AT5G55660,AT5G39960,AT3G19190,AT4G37070,AT4G37050,AT2G26560,AT1G67740,AT2G25970,AT5G42080,AT2G39800,AT3G55610,AT4G04610,AT4G21990,AT1G62180,AT1G33680,AT3G26935,AT3G60370,AT2G26330,AT2G29525,AT3G44160,AT5G01630,AT1G55930,AT1G61150,AT2G23420,AT3G61760,AT2G28100,AT1G16570,AT1G14830…	T13O15.2,CCP1,F13K23.18,F15H11.19,F4J355_ARATH,F4J3I0_ARATH,ATG13B,PA200,P36,F4C21.12,F28M11.1,F23K16.50,MDF20.10,MYH19.120,ATG2,PLP1,PLP3,PLP2,PSBY,F17H15.1,DRP1A,P5CSA,P5CSB,APR1,APR3,APR2,F14M2.18,PAT07,FKBP20-2,ERECTA,IPCS3,P39,BRCA2B,CBSDUFCH2,GID8,NAPRT2,DRP1B,FUC1,TUN,DRP1C,EMB3147,ATG9,NAPRT1,NEK3,DRP1D,ARL8A,CRCK2,B''GAMMA,F6F22.10,ARL8C,ARL8B,F18O21_80,MFH8.8,OFUT35,DELTA-ADR,NEK2,CRCK1…	0.00014	0.0126	Cytoplasm
Component	GO:0110165	132	19483	3702	AT3G01380,AT3G50380,AT1G48090,AT1G05120,AT1G72416,AT2G34560,AT5G62230,AT1G12930,AT1G71000,AT2G05120,AT2G46620,AT3G44620,AT3G57790,AT3G18770,AT3G13330,AT3G48620,AT4G03200,AT4G33565,AT4G10070,AT4G37780,AT4G39420,AT5G55660,AT5G39960,AT3G19190,AT2G23320,AT4G37070,AT4G37050,AT4G15620,AT2G26560,AT1G67740,AT5G65790,AT2G25970,AT4G17905,AT5G42080,AT2G39800,AT3G55610,AT4G04610,AT4G21990,AT1G62180,AT1G33680…	T13O15.2,A0A1I9LQ65,A0A1P8AMQ1,A0A1P8AWF9,B3H5X6_ARATH,CCP1,ERL1,F13K23.18,F15H11.19,NUP133,F13A10.15,F4J355_ARATH,F4J3I0_ARATH,ATG13B,PA200,P36,F4C21.12,F4JJ02_ARATH,F28M11.1,MYB87,F23K16.50,MDF20.10,MYH19.120,ATG2,WRKY15,PLP1,PLP3,Dl3850w,PLP2,PSBY,F6H11.100,F17H15.1,ATL53,DRP1A,P5CSA,P5CSB,APR1,APR3,APR2,F14M2.18,PAT07,FKBP20-2,ERECTA,IPCS3,P39,ERL2,BRCA2B,CBSDUFCH2,GID8,NAPRT2,DRP1B,FUC1,EER5…	0.00018	0.0132	Cellular anatomical entity
Component	GO:0005765	3	18	3702	AT3G49870,AT5G37680,AT5G67560	ARL8A,ARL8C,ARL8B	0.00023	0.0152	Lysosomal membrane
Component	GO:0019898	5	92	3702	AT3G50380,AT1G48090,AT3G18770,AT3G19190,AT3G49590	A0A1I9LQ65,A0A1P8AMQ1,ATG13B,ATG2,ATG13A	0.00024	0.0152	Extrinsic component of membrane
Component	GO:1990316	2	3	3702	AT3G18770,AT3G49590	ATG13B,ATG13A	0.00032	0.018	Atg1/ULK1 kinase complex
Component	GO:0005764	4	55	3702	AT2G28100,AT3G49870,AT5G37680,AT5G67560	FUC1,ARL8A,ARL8C,ARL8B	0.00037	0.0194	Lysosome
Component	GO:0016020	67	8287	3702	AT3G01380,AT3G50380,AT1G48090,AT1G72416,AT5G62230,AT2G46620,AT3G18770,AT3G48620,AT4G33565,AT4G39420,AT3G19190,AT4G15620,AT2G26560,AT1G67740,AT4G17905,AT5G42080,AT3G26935,AT2G26330,AT2G29525,AT3G44160,AT5G07180,AT1G55930,AT3G61760,AT5G08200,AT1G16570,AT4G15630,AT5G10740,AT1G14830,AT1G72220,AT2G31260,AT4G31750,AT2G44590,AT4G32600,AT3G49870,AT5G23130,AT1G43900,AT5G37680,AT1G22990,AT5G67560,AT4G15610…	T13O15.2,A0A1I9LQ65,A0A1P8AMQ1,B3H5X6_ARATH,ERL1,F13A10.15,ATG13B,P36,F4JJ02_ARATH,F23K16.50,ATG2,Dl3850w,PLP2,PSBY,ATL53,DRP1A,PAT07,ERECTA,IPCS3,P39,ERL2,CBSDUFCH2,DRP1B,F8L15.5,TUN,Dl3855w,MAJ23.3,DRP1C,ATL54,ATG9,WIN2,DRP1D,F4D11.200,ARL8A,MYJ24.12,F28H19.16,ARL8C,HIPP22,ARL8B,Dl3547c,OFUT35,DELTA-ADR,NUP160,F5I6.15,HIPP20,MNC6.8,PAT06,DRP1E,F3H9.20,HIPP21,ATL52,FRB1,CBSDUFCH1,F12M12.190,ATL5…	0.00078	0.0372	Membrane
Component	GO:0005938	5	122	3702	AT5G42080,AT1G14830,AT5G28290,AT3G04810,AT1G54510	DRP1A,DRP1C,NEK3,NEK2,NEK1	0.00083	0.0381	Cell cortex
Component	GO:0005741	4	73	3702	AT3G48620,AT3G44160,AT5G53540,AT4G27680	P36,P39,MNC6.8,T29A15.170	0.001	0.043	Mitochondrial outer membrane
Component	GO:0043229	94	12866	3702	AT3G01380,AT1G05120,AT2G34560,AT1G71000,AT2G05120,AT3G44620,AT3G57790,AT3G18770,AT3G13330,AT3G48620,AT4G03200,AT4G37780,AT5G55660,AT5G39960,AT3G19190,AT2G23320,AT2G26560,AT1G67740,AT5G65790,AT2G25970,AT5G42080,AT2G39800,AT3G55610,AT4G04610,AT4G21990,AT1G62180,AT3G26935,AT3G60370,AT2G26330,AT2G29525,AT3G44160,AT5G01630,AT1G55930,AT1G61150,AT3G61760,AT2G28100,AT2G19560,AT1G16570,AT1G14830,AT1G24560…	T13O15.2,A0A1P8AWF9,CCP1,F15H11.19,NUP133,F4J355_ARATH,F4J3I0_ARATH,ATG13B,PA200,P36,F4C21.12,MYB87,MDF20.10,MYH19.120,ATG2,WRKY15,PLP2,PSBY,F6H11.100,F17H15.1,DRP1A,P5CSA,P5CSB,APR1,APR3,APR2,PAT07,FKBP20-2,ERECTA,IPCS3,P39,BRCA2B,CBSDUFCH2,GID8,DRP1B,FUC1,EER5,TUN,DRP1C,F21J9.22,EMB3147,ATG9,NEK3,DRP1D,ARL8A,B''GAMMA,F6F22.10,ARL8C,ARL8B,F18O21_80,MFH8.8,OFUT35,DELTA-ADR,NUP160,NEK2,MLE2.18,RH3…	0.00098	0.043	Intracellular organelle
Component	GO:0031902	3	33	3702	AT3G49870,AT5G37680,AT5G67560	ARL8A,ARL8C,ARL8B	0.0011	0.0459	Late endosome membrane
Component	GO:0030173	3	35	3702	AT2G29525,AT3G54020,AT2G37940	IPCS3,IPCS1,IPCS2	0.0013	0.0481	Integral component of Golgi membrane
Function	GO:0047372	5	21	3702	AT4G37070,AT4G37060,AT4G37050,AT2G26560,AT5G43590	PLP1,PLP5,PLP3,PLP2,PLP4	3.43e-07	0.0011	Acylglycerol lipase activity
Function	GO:0009973	3	3	3702	AT4G04610,AT4G21990,AT1G62180	APR1,APR3,APR2	3.63e-06	0.0058	Adenylyl-sulfate reductase activity
Function	GO:0033188	3	4	3702	AT2G29525,AT3G54020,AT2G37940	IPCS3,IPCS1,IPCS2	6.32e-06	0.0058	Sphingomyelin synthase activity
Function	GO:0033741	3	3	3702	AT4G04610,AT4G21990,AT1G62180	APR1,APR3,APR2	3.63e-06	0.0058	Adenylyl-sulfate reductase (glutathione) activity
Function	GO:0045140	3	4	3702	AT2G29525,AT3G54020,AT2G37940	IPCS3,IPCS1,IPCS2	6.32e-06	0.0058	Inositol phosphoceramide synthase activity
Function	GO:0047493	3	4	3702	AT2G29525,AT3G54020,AT2G37940	IPCS3,IPCS1,IPCS2	6.32e-06	0.0058	Ceramide cholinephosphotransferase activity
Function	GO:0016780	4	25	3702	AT3G01380,AT2G29525,AT3G54020,AT2G37940	T13O15.2,IPCS3,IPCS1,IPCS2	2.19e-05	0.01	Phosphotransferase activity, for other substituted phosphate groups
Function	GO:0003924	8	205	3702	AT5G42080,AT3G61760,AT1G14830,AT2G44590,AT3G49870,AT5G37680,AT5G67560,AT3G60190	DRP1A,DRP1B,DRP1C,DRP1D,ARL8A,ARL8C,ARL8B,DRP1E	3.28e-05	0.0131	GTPase activity
Function	GO:0004620	5	61	3702	AT4G37070,AT4G37060,AT4G37050,AT2G26560,AT5G43590	PLP1,PLP5,PLP3,PLP2,PLP4	3.88e-05	0.0138	Phospholipase activity
Function	GO:0005525	9	288	3702	AT5G39960,AT5G42080,AT3G61760,AT1G14830,AT2G44590,AT3G49870,AT5G37680,AT5G67560,AT3G60190	MYH19.120,DRP1A,DRP1B,DRP1C,DRP1D,ARL8A,ARL8C,ARL8B,DRP1E	5.64e-05	0.018	GTP binding
Function	GO:0016423	3	11	3702	AT3G56120,AT5G15810,AT3G02320	F18O21_80,F14F8_190,F11A12.1	6.38e-05	0.018	tRNA (guanine) methyltransferase activity
Function	GO:0017111	13	606	3702	AT2G34560,AT2G46620,AT5G42080,AT3G61760,AT1G14830,AT2G44590,AT3G49870,AT5G37680,AT5G67560,AT5G54910,AT5G53540,AT3G60190,AT4G27680	CCP1,F13A10.15,DRP1A,DRP1B,DRP1C,DRP1D,ARL8A,ARL8C,ARL8B,RH32,MNC6.8,DRP1E,T29A15.170	6.05e-05	0.018	Nucleoside-triphosphatase activity
Function	GO:0042393	6	114	3702	AT3G13330,AT5G55660,AT5G63550,AT3G01460,AT3G48710,AT4G26630	PA200,MDF20.10,MLE2.18,MBD9,T8P19.220,DEK3	6.8e-05	0.018	Histone binding
Function	GO:0016740	42	4061	3702	AT3G01380,AT5G20130,AT5G62230,AT4G17905,AT2G39800,AT3G55610,AT3G26935,AT2G26330,AT2G29525,AT5G07180,AT2G23420,AT1G16570,AT1G72220,AT2G30200,AT4G36940,AT5G28290,AT3G63280,AT2G30880,AT4G00330,AT2G19870,AT3G56120,AT5G35570,AT3G04810,AT5G58940,AT5G43590,AT5G41060,AT5G13530,AT5G17600,AT5G01100,AT5G15810,AT3G46220,AT5G10380,AT3G54020,AT3G54100,AT3G04460,AT5G14580,AT3G01460,AT2G37980,AT2G37940,AT1G54510…	T13O15.2,F5O24.20,ERL1,ATL53,P5CSA,P5CSB,PAT07,ERECTA,IPCS3,ERL2,NAPRT2,TUN,ATL54,EMB3147,NAPRT1,NEK3,NEK4,SWAP70,CRCK2,F6F22.10,F18O21_80,OFUT35,NEK2,CRCK1,PLP4,PAT06,KEG,ATL52,FRB1,F14F8_190,F12M12.190,ATL55,IPCS1,OFUT28,PEX12,PNP2,MBD9,OFUT19,IPCS2,NEK1,ATL51,F11A12.1	8.96e-05	0.0205	Transferase activity
Function	GO:0004349	2	2	3702	AT2G39800,AT3G55610	P5CSA,P5CSB	0.00019	0.032	Glutamate 5-kinase activity
Function	GO:0004350	2	2	3702	AT2G39800,AT3G55610	P5CSA,P5CSB	0.00019	0.032	glutamate-5-semialdehyde dehydrogenase activity
Function	GO:0004516	2	2	3702	AT2G23420,AT4G36940	NAPRT2,NAPRT1	0.00019	0.032	Nicotinate phosphoribosyltransferase activity
Function	GO:0005488	89	11632	3702	AT1G05120,AT2G34560,AT5G62230,AT2G46620,AT3G13330,AT4G10070,AT4G37780,AT5G55660,AT5G39960,AT3G19190,AT2G23320,AT4G15620,AT2G26560,AT1G67740,AT4G39700,AT4G08570,AT2G25970,AT4G17905,AT5G42080,AT2G39800,AT3G55610,AT4G04610,AT4G21990,AT1G33680,AT2G26330,AT5G28850,AT5G07180,AT5G01630,AT4G00020,AT1G03960,AT1G55930,AT2G23420,AT3G61760,AT2G19560,AT4G15630,AT5G10740,AT1G14830,AT1G72220,AT4G36940,AT5G28290…	A0A1P8AWF9,CCP1,ERL1,F13A10.15,PA200,F28M11.1,MYB87,MDF20.10,MYH19.120,ATG2,WRKY15,Dl3850w,PLP2,PSBY,HIPP23,HIPP24,F17H15.1,ATL53,DRP1A,P5CSA,P5CSB,APR1,APR3,F14M2.18,ERECTA,B''BETA,ERL2,BRCA2B,BRCA2A,B''EPSILON,CBSDUFCH2,NAPRT2,DRP1B,EER5,Dl3855w,MAJ23.3,DRP1C,ATL54,NAPRT1,NEK3,NEK4,WIN2,DRP1D,F4D11.200,ARL8A,CRCK2,F28H19.16,B''GAMMA,F6F22.10,ARL8C,HIPP22,ARL8B,MFH8.8,F5I6.15,HIPP20,NEK2,MLE2.18…	0.00029	0.0406	Binding
Function	GO:0004514	2	3	3702	AT2G23420,AT4G36940	NAPRT2,NAPRT1	0.00032	0.0411	Nicotinate-nucleotide diphosphorylase (carboxylating) activity
Function	GO:0051539	5	99	3702	AT4G15620,AT4G04610,AT4G21990,AT4G15630,AT3G06390	Dl3850w,APR1,APR3,Dl3855w,F24P17.14	0.00034	0.0412	4 iron, 4 sulfur cluster binding
Function	GO:0019888	4	57	3702	AT5G28850,AT1G03960,AT5G28900,AT1G54450	B''BETA,B''EPSILON,B''GAMMA,B''DELTA	0.00042	0.0494	Protein phosphatase regulator activity
Keyword	KW-0072	4	43	3702	AT3G18770,AT3G19190,AT2G31260,AT3G49590	ATG13B,ATG2,ATG9,ATG13A	0.00015	0.0363	Autophagy
Keyword	KW-0104	3	13	3702	AT1G22990,AT1G71050,AT5G17450	HIPP22,HIPP20,HIPP21	9.74e-05	0.0363	Cadmium
Keyword	KW-0131	8	268	3702	AT5G42080,AT5G01630,AT4G00020,AT1G14830,AT3G49870,AT5G37680,AT5G67560,AT3G60190	DRP1A,BRCA2B,BRCA2A,DRP1C,ARL8A,ARL8C,ARL8B,DRP1E	0.0002	0.0363	Cell cycle
Keyword	KW-0132	6	198	3702	AT5G42080,AT1G14830,AT3G49870,AT5G37680,AT5G67560,AT3G60190	DRP1A,DRP1C,ARL8A,ARL8C,ARL8B,DRP1E	0.0012	0.0363	Cell division
Keyword	KW-0159	3	24	3702	AT3G49870,AT5G37680,AT5G67560	ARL8A,ARL8C,ARL8B	0.00049	0.0363	Chromosome partition
Keyword	KW-0198	3	16	3702	AT4G04610,AT4G21990,AT1G62180	APR1,APR3,APR2	0.00017	0.0363	Cysteine biosynthesis
Keyword	KW-0206	8	254	3702	AT5G42080,AT3G61760,AT1G14830,AT2G44590,AT3G49870,AT5G37680,AT5G67560,AT3G60190	DRP1A,DRP1B,DRP1C,DRP1D,ARL8A,ARL8C,ARL8B,DRP1E	0.00014	0.0363	Cytoskeleton
Keyword	KW-0294	4	40	3702	AT5G35570,AT5G01100,AT3G54100,AT2G37980	OFUT35,FRB1,OFUT28,OFUT19	0.00012	0.0363	Fucose metabolism
Keyword	KW-0342	8	242	3702	AT5G42080,AT3G61760,AT1G14830,AT2G44590,AT3G49870,AT5G37680,AT5G67560,AT3G60190	DRP1A,DRP1B,DRP1C,DRP1D,ARL8A,ARL8C,ARL8B,DRP1E	0.0001	0.0363	GTP-binding
Keyword	KW-0458	3	12	3702	AT3G49870,AT5G37680,AT5G67560	ARL8A,ARL8C,ARL8B	7.95e-05	0.0363	Lysosome
Keyword	KW-0505	5	95	3702	AT5G42080,AT3G61760,AT1G14830,AT2G44590,AT3G60190	DRP1A,DRP1B,DRP1C,DRP1D,DRP1E	0.00028	0.0363	Motor protein
Keyword	KW-0636	5	125	3702	AT4G39700,AT4G08570,AT1G22990,AT1G71050,AT5G17450	HIPP23,HIPP24,HIPP22,HIPP20,HIPP21	0.00093	0.0363	Prenylation
Keyword	KW-0641	2	3	3702	AT2G39800,AT3G55610	P5CSA,P5CSB	0.00032	0.0363	Proline biosynthesis
Keyword	KW-0746	3	18	3702	AT2G29525,AT3G54020,AT2G37940	IPCS3,IPCS1,IPCS2	0.00023	0.0363	Sphingolipid metabolism
Keyword	KW-0808	38	3498	3702	AT5G20130,AT5G62230,AT4G17905,AT2G39800,AT3G55610,AT3G26935,AT2G26330,AT2G29525,AT5G07180,AT2G23420,AT1G16570,AT1G72220,AT4G36940,AT5G28290,AT3G63280,AT4G00330,AT2G19870,AT3G56120,AT5G35570,AT3G04810,AT5G58940,AT5G43590,AT5G41060,AT5G13530,AT5G17600,AT5G01100,AT5G15810,AT3G46220,AT5G10380,AT3G54020,AT3G54100,AT5G14580,AT3G01460,AT2G37980,AT2G37940,AT1G54510,AT3G03550,AT3G02320	F5O24.20,ERL1,ATL53,P5CSA,P5CSB,PAT07,ERECTA,IPCS3,ERL2,NAPRT2,TUN,ATL54,NAPRT1,NEK3,NEK4,CRCK2,F6F22.10,F18O21_80,OFUT35,NEK2,CRCK1,PLP4,PAT06,KEG,ATL52,FRB1,F14F8_190,F12M12.190,ATL55,IPCS1,OFUT28,PNP2,MBD9,OFUT19,IPCS2,NEK1,ATL51,F11A12.1	7.79e-05	0.0363	Transferase
Keyword	KW-0819	4	60	3702	AT3G56120,AT5G15810,AT5G14580,AT3G02320	F18O21_80,F14F8_190,PNP2,F11A12.1	0.0005	0.0363	tRNA processing
Keyword	KW-0488	5	142	3702	AT4G39700,AT4G08570,AT1G22990,AT1G71050,AT5G17450	HIPP23,HIPP24,HIPP22,HIPP20,HIPP21	0.0016	0.0438	Methylation
Keyword	KW-0662	2	9	3702	AT2G23420,AT4G36940	NAPRT2,NAPRT1	0.0017	0.0448	Pyridine nucleotide biosynthesis
Keyword	KW-0028	5	149	3702	AT2G39800,AT3G55610,AT4G04610,AT4G21990,AT1G62180	P5CSA,P5CSB,APR1,APR3,APR2	0.002	0.048	Amino-acid biosynthesis
Keyword	KW-0547	25	2334	3702	AT1G05120,AT5G62230,AT2G46620,AT5G42080,AT2G39800,AT3G55610,AT2G26330,AT5G07180,AT3G61760,AT1G14830,AT5G28290,AT3G63280,AT2G44590,AT3G49870,AT4G00330,AT5G37680,AT5G67560,AT3G04810,AT5G54910,AT5G58940,AT5G53540,AT3G60190,AT5G13530,AT1G54510,AT4G27680	A0A1P8AWF9,ERL1,F13A10.15,DRP1A,P5CSA,P5CSB,ERECTA,ERL2,DRP1B,DRP1C,NEK3,NEK4,DRP1D,ARL8A,CRCK2,ARL8C,ARL8B,NEK2,RH32,CRCK1,MNC6.8,DRP1E,KEG,NEK1,T29A15.170	0.002	0.048	Nucleotide-binding
KEGG	ath04136	4	41	3702	AT3G18770,AT3G19190,AT2G31260,AT3G49590	ATG13B,ATG2,ATG9,ATG13A	0.00013	0.0173	Autophagy - other
SMART	SM00302	5	8	3702	AT5G42080,AT3G61760,AT1G14830,AT2G44590,AT3G60190	DRP1A,DRP1B,DRP1C,DRP1D,DRP1E	7.13e-09	3.94e-06	Dynamin GTPase effector domain
SMART	SM00053	5	12	3702	AT5G42080,AT3G61760,AT1G14830,AT2G44590,AT3G60190	DRP1A,DRP1B,DRP1C,DRP1D,DRP1E	3.37e-08	9.3e-06	Dynamin, GTPase
SMART	SM00184	12	513	3702	AT1G05120,AT4G33565,AT4G17905,AT1G72220,AT4G32600,AT1G80400,AT5G13530,AT5G17600,AT5G10380,AT3G04460,AT3G01460,AT3G03550	A0A1P8AWF9,F4JJ02_ARATH,ATL53,ATL54,F4D11.200,F5I6.15,KEG,ATL52,ATL55,PEX12,MBD9,ATL51	5.25e-05	0.0097	Ring finger
SMART	SM00322	4	37	3702	AT4G10070,AT2G25970,AT1G33680,AT5G14580	F28M11.1,F17H15.1,F14M2.18,PNP2	8.85e-05	0.0122	K homology RNA-binding domain
SMART	SM01091	2	2	3702	AT1G55930,AT3G13070	CBSDUFCH2,CBSDUFCH1	0.00019	0.0214	Transporter associated domain
InterPro	IPR016035	6	14	3702	AT4G37070,AT4G37060,AT4G37050,AT2G26560,AT2G30200,AT5G43590	PLP1,PLP5,PLP3,PLP2,EMB3147,PLP4	1.16e-09	7.32e-06	Acyl transferase/acyl hydrolase/lysophospholipase
InterPro	IPR000375	5	11	3702	AT5G42080,AT3G61760,AT1G14830,AT2G44590,AT3G60190	DRP1A,DRP1B,DRP1C,DRP1D,DRP1E	2.39e-08	3.5e-05	Dynamin stalk domain
InterPro	IPR003130	5	10	3702	AT5G42080,AT3G61760,AT1G14830,AT2G44590,AT3G60190	DRP1A,DRP1B,DRP1C,DRP1D,DRP1E	1.65e-08	3.5e-05	Dynamin GTPase effector
InterPro	IPR019762	5	9	3702	AT5G42080,AT3G61760,AT1G14830,AT2G44590,AT3G60190	DRP1A,DRP1B,DRP1C,DRP1D,DRP1E	1.1e-08	3.5e-05	Dynamin, GTPase region, conserved site
InterPro	IPR020850	5	10	3702	AT5G42080,AT3G61760,AT1G14830,AT2G44590,AT3G60190	DRP1A,DRP1B,DRP1C,DRP1D,DRP1E	1.65e-08	3.5e-05	GTPase effector domain
InterPro	IPR001401	5	13	3702	AT5G42080,AT3G61760,AT1G14830,AT2G44590,AT3G60190	DRP1A,DRP1B,DRP1C,DRP1D,DRP1E	4.64e-08	4.89e-05	Dynamin, GTPase domain
InterPro	IPR002641	5	13	3702	AT4G37070,AT4G37060,AT4G37050,AT2G26560,AT5G43590	PLP1,PLP5,PLP3,PLP2,PLP4	4.64e-08	4.89e-05	Patatin-like phospholipase domain
InterPro	IPR022812	5	13	3702	AT5G42080,AT3G61760,AT1G14830,AT2G44590,AT3G60190	DRP1A,DRP1B,DRP1C,DRP1D,DRP1E	4.64e-08	4.89e-05	Dynamin
InterPro	IPR030381	5	15	3702	AT5G42080,AT3G61760,AT1G14830,AT2G44590,AT3G60190	DRP1A,DRP1B,DRP1C,DRP1D,DRP1E	8.32e-08	5.85e-05	Dynamin-type guanine nucleotide-binding (G) domain
InterPro	IPR045063	5	15	3702	AT5G42080,AT3G61760,AT1G14830,AT2G44590,AT3G60190	DRP1A,DRP1B,DRP1C,DRP1D,DRP1E	8.32e-08	5.85e-05	Dynamin, N-terminal
InterPro	IPR041534	4	5	3702	AT5G28850,AT1G03960,AT5G28900,AT1G54450	B''BETA,B''EPSILON,B''GAMMA,B''DELTA	1.27e-07	7.31e-05	PP2A regulatory subunit B, EF-hand domain
InterPro	IPR045181	5	17	3702	AT4G39700,AT4G08570,AT1G22990,AT1G71050,AT5G17450	HIPP23,HIPP24,HIPP22,HIPP20,HIPP21	1.4e-07	7.38e-05	Heavy metal binding protein HIPP-like
InterPro	IPR018872	4	7	3702	AT2G23320,AT2G24570,AT4G24240,AT4G31550	WRKY15,WRKY17,WRKY7,WRKY11	3.3e-07	0.00016	Zn-cluster domain
InterPro	IPR004508	3	3	3702	AT4G04610,AT4G21990,AT1G62180	APR1,APR3,APR2	3.63e-06	0.0016	Thioredoxin-independent 5-adenylylsulphate reductase
InterPro	IPR004511	3	3	3702	AT4G04610,AT4G21990,AT1G62180	APR1,APR3,APR2	3.63e-06	0.0016	Phosphoadenosine phosphosulphate/adenosine 5-phosphosulphate reductase
InterPro	IPR002500	3	4	3702	AT4G04610,AT4G21990,AT1G62180	APR1,APR3,APR2	6.32e-06	0.0025	Phosphoadenosine phosphosulphate reductase
InterPro	IPR025749	3	4	3702	AT2G29525,AT3G54020,AT2G37940	IPCS3,IPCS1,IPCS2	6.32e-06	0.0025	Sphingomyelin synthase-like domain
InterPro	IPR044154	3	4	3702	AT3G49870,AT5G37680,AT5G67560	ARL8A,ARL8C,ARL8B	6.32e-06	0.0025	ADP-ribosylation factor-like protein 8A/8B
InterPro	IPR044198	3	4	3702	AT5G55660,AT3G48710,AT4G26630	MDF20.10,T8P19.220,DEK3	6.32e-06	0.0025	Protein DEK
InterPro	IPR045221	3	4	3702	AT2G29525,AT3G54020,AT2G37940	IPCS3,IPCS1,IPCS2	6.32e-06	0.0025	Sphingomyelin synthase-like
InterPro	IPR044600	3	7	3702	AT4G17905,AT5G17600,AT3G03550	ATL53,ATL52,ATL51	2.14e-05	0.0065	RING-H2 finger protein ATL1/ATL16-like
InterPro	IPR036163	5	65	3702	AT4G39700,AT4G08570,AT1G22990,AT1G71050,AT5G17450	HIPP23,HIPP24,HIPP22,HIPP20,HIPP21	5.16e-05	0.0148	Heavy metal-associated domain superfamily
InterPro	IPR024709	4	33	3702	AT5G35570,AT5G01100,AT3G54100,AT2G37980	OFUT35,FRB1,OFUT28,OFUT19	5.88e-05	0.0162	Putative O-fucosyltransferase, plant
InterPro	IPR006121	5	71	3702	AT4G39700,AT4G08570,AT1G22990,AT1G71050,AT5G17450	HIPP23,HIPP24,HIPP22,HIPP20,HIPP21	7.66e-05	0.0202	Heavy metal-associated domain, HMA
InterPro	IPR036612	4	36	3702	AT4G10070,AT2G25970,AT1G33680,AT5G14580	F28M11.1,F17H15.1,F14M2.18,PNP2	8.02e-05	0.0203	K Homology domain, type 1 superfamily
InterPro	IPR000222	4	38	3702	AT5G10740,AT4G31750,AT1G43900,AT5G53140	MAJ23.3,WIN2,F28H19.16,MFH8.8	9.74e-05	0.0237	PPM-type phosphatase, divalent cation binding
InterPro	IPR014876	3	13	3702	AT5G55660,AT3G48710,AT4G26630	MDF20.10,T8P19.220,DEK3	9.74e-05	0.0237	DEK, C-terminal
InterPro	IPR019378	4	39	3702	AT5G35570,AT5G01100,AT3G54100,AT2G37980	OFUT35,FRB1,OFUT28,OFUT19	0.00011	0.0237	GDP-fucose protein O-fucosyltransferase
InterPro	IPR044173	3	13	3702	AT4G15620,AT4G15630,AT3G06390	Dl3850w,Dl3855w,F24P17.14	9.74e-05	0.0237	Casparian strip membrane protein/CASP-like protein
InterPro	IPR044675	3	14	3702	AT4G33565,AT1G72220,AT5G10380	F4JJ02_ARATH,ATL54,ATL55	0.00012	0.0249	E3 ubiquitin-protein ligase RING1-like
InterPro	IPR000965	2	2	3702	AT2G39800,AT3G55610	P5CSA,P5CSB	0.00019	0.0396	GPR domain
InterPro	IPR002093	2	2	3702	AT5G01630,AT4G00020	BRCA2B,BRCA2A	0.00019	0.0396	BRCA2 repeat
InterPro	IPR005170	2	2	3702	AT1G55930,AT3G13070	CBSDUFCH2,CBSDUFCH1	0.00019	0.0396	Transporter-associated domain
InterPro	IPR005715	2	2	3702	AT2G39800,AT3G55610	P5CSA,P5CSB	0.00019	0.0396	Glutamate 5-kinase/delta-1-pyrroline-5-carboxylate synthase
InterPro	IPR005766	2	2	3702	AT2G39800,AT3G55610	P5CSA,P5CSB	0.00019	0.0396	Delta l-pyrroline-5-carboxylate synthetase
InterPro	IPR006405	2	2	3702	AT2G23420,AT4G36940	NAPRT2,NAPRT1	0.00019	0.0396	Nicotinate phosphoribosyltransferase pncB-type
InterPro	IPR007229	2	2	3702	AT2G23420,AT4G36940	NAPRT2,NAPRT1	0.00019	0.0396	Nicotinate phosphoribosyltransferase family
InterPro	IPR013083	13	709	3702	AT1G05120,AT4G33565,AT4G17905,AT3G19895,AT1G72220,AT4G32600,AT1G80400,AT5G13530,AT5G17600,AT5G10380,AT3G04460,AT3G01460,AT3G03550	A0A1P8AWF9,F4JJ02_ARATH,ATL53,Q8GWB1_ARATH,ATL54,F4D11.200,F5I6.15,KEG,ATL52,ATL55,PEX12,MBD9,ATL51	0.00028	0.0396	Zinc finger, RING/FYVE/PHD-type
InterPro	IPR015187	2	2	3702	AT5G01630,AT4G00020	BRCA2B,BRCA2A	0.00019	0.0396	BRCA2, OB1
InterPro	IPR015252	2	2	3702	AT5G01630,AT4G00020	BRCA2B,BRCA2A	0.00019	0.0396	Breast cancer type 2 susceptibility protein, helical domain
InterPro	IPR015525	2	2	3702	AT5G01630,AT4G00020	BRCA2B,BRCA2A	0.00019	0.0396	Breast cancer type 2 susceptibility protein
InterPro	IPR018731	2	2	3702	AT3G18770,AT3G49590	ATG13B,ATG13A	0.00019	0.0396	Autophagy-related protein 13, N-terminal
InterPro	IPR019797	2	2	3702	AT2G39800,AT3G55610	P5CSA,P5CSB	0.00019	0.0396	Glutamate 5-kinase, conserved site
InterPro	IPR020593	2	2	3702	AT2G39800,AT3G55610	P5CSA,P5CSB	0.00019	0.0396	Gamma-glutamyl phosphate reductase GPR, conserved site
InterPro	IPR036315	2	2	3702	AT5G01630,AT4G00020	BRCA2B,BRCA2A	0.00019	0.0396	BRCA2 helical domain superfamily
InterPro	IPR040182	2	2	3702	AT3G18770,AT3G49590	ATG13B,ATG13A	0.00019	0.0396	Autophagy-related protein 13
InterPro	IPR040300	2	2	3702	AT3G49055,AT1G24560	T2J13.1,F21J9.22	0.00019	0.0396	Uncharacterized protein At3g49055-like
InterPro	IPR040727	2	2	3702	AT2G23420,AT4G36940	NAPRT2,NAPRT1	0.00019	0.0396	Nicotinate phosphoribosyltransferase, N-terminal domain
InterPro	IPR041525	2	2	3702	AT2G23420,AT4G36940	NAPRT2,NAPRT1	0.00019	0.0396	Nicotinate/nicotinamide phosphoribosyltransferase
InterPro	IPR041619	2	2	3702	AT2G23420,AT4G36940	NAPRT2,NAPRT1	0.00019	0.0396	Nicotinate phosphoribosyltransferase C-terminal domain
InterPro	IPR001057	2	3	3702	AT2G39800,AT3G55610	P5CSA,P5CSB	0.00032	0.0399	Glutamate/acetylglutamate kinase
InterPro	IPR002905	2	3	3702	AT5G15810,AT3G02320	F14F8_190,F11A12.1	0.00032	0.0399	tRNA methyltransferase, Trm1
InterPro	IPR009543	2	3	3702	AT3G50380,AT1G48090	A0A1I9LQ65,A0A1P8AMQ1	0.00032	0.0399	Vacuolar protein sorting-associated protein 13, VPS13 adaptor binding domain
InterPro	IPR036068	2	3	3702	AT2G23420,AT4G36940	NAPRT2,NAPRT1	0.00032	0.0399	Nicotinate phosphoribosyltransferase-like, C-terminal
InterPro	IPR042296	2	3	3702	AT5G15810,AT3G02320	F14F8_190,F11A12.1	0.00032	0.0399	tRNA methyltransferase, Trm1, C-terminal
InterPro	IPR045030	2	3	3702	AT5G08200,AT5G23130	F8L15.5,MYJ24.12	0.00032	0.0399	LysM and putative peptidoglycan-binding domain-containing protein 1-4
Pfam	PF01734	5	13	3702	AT4G37070,AT4G37060,AT4G37050,AT2G26560,AT5G43590	PLP1,PLP5,PLP3,PLP2,PLP4	4.64e-08	9.6e-05	Patatin-like phospholipase
Pfam	PF10533	4	7	3702	AT2G23320,AT2G24570,AT4G24240,AT4G31550	WRKY15,WRKY17,WRKY7,WRKY11	3.3e-07	0.00034	Plant zinc cluster domain
Pfam	PF08766	4	12	3702	AT5G55660,AT5G63550,AT3G48710,AT4G26630	MDF20.10,MLE2.18,T8P19.220,DEK3	1.78e-06	0.0012	DEK C terminal domain
Pfam	PF01507	3	4	3702	AT4G04610,AT4G21990,AT1G62180	APR1,APR3,APR2	6.32e-06	0.0033	Phosphoadenosine phosphosulfate reductase family
Pfam	PF02005	3	5	3702	AT3G56120,AT5G15810,AT3G02320	F18O21_80,F14F8_190,F11A12.1	1.01e-05	0.0042	N2,N2-dimethylguanosine tRNA methyltransferase
Pfam	PF14360	3	5	3702	AT2G29525,AT3G54020,AT2G37940	IPCS3,IPCS1,IPCS2	1.01e-05	0.0042	PAP2 superfamily C-terminal
Pfam	PF09439	3	6	3702	AT3G49870,AT5G37680,AT5G67560	ARL8A,ARL8C,ARL8B	1.5e-05	0.0044	Signal recognition particle receptor beta subunit
Pfam	PF00403	5	58	3702	AT4G39700,AT4G08570,AT1G22990,AT1G71050,AT5G17450	HIPP23,HIPP24,HIPP22,HIPP20,HIPP21	3.09e-05	0.008	Heavy-metal-associated domain
Pfam	PF10250	4	41	3702	AT5G35570,AT5G01100,AT3G54100,AT2G37980	OFUT35,FRB1,OFUT28,OFUT19	0.00013	0.0294	GDP-fucose protein O-fucosyltransferase
Pfam	PF00634	2	2	3702	AT5G01630,AT4G00020	BRCA2B,BRCA2A	0.00019	0.0401	BRCA2 repeat
Pfam	PF04095	2	2	3702	AT2G23420,AT4G36940	NAPRT2,NAPRT1	0.00019	0.0401	Nicotinate phosphoribosyltransferase (NAPRTase) family
Pfam	PF09103	2	2	3702	AT5G01630,AT4G00020	BRCA2B,BRCA2A	0.00019	0.0401	BRCA2, oligonucleotide/oligosaccharide-binding, domain 1
Pfam	PF09169	2	2	3702	AT5G01630,AT4G00020	BRCA2B,BRCA2A	0.00019	0.0401	BRCA2, helical
Pfam	PF10033	2	2	3702	AT3G18770,AT3G49590	ATG13B,ATG13A	0.00019	0.0401	Autophagy-related protein 13
PMID	PMID:31037808	6	15	3702	AT4G37780,AT5G65790,AT5G23000,AT5G57620,AT3G49690,AT2G36890	MYB87,F6H11.100,RAX1,MYB36,RAX3,RAX2	1.61e-09	0.00016	(2019) Discovery of key regulators of dark gland development and hypericin biosynthesis in St. Johns Wort (Hypericum perforatum).
PMID	PMID:35122280	5	7	3702	AT4G37780,AT5G65790,AT5G23000,AT5G57620,AT3G49690	MYB87,F6H11.100,RAX1,MYB36,RAX3	4.41e-09	0.00022	(2022) The SINGLE FLOWER (SFL) gene encodes a MYB transcription factor that regulates the number of flowers produced by the inflorescence of chickpea.
PMID	PMID:30258010	5	10	3702	AT5G42080,AT3G61760,AT1G14830,AT2G44590,AT3G60190	DRP1A,DRP1B,DRP1C,DRP1D,DRP1E	1.65e-08	0.00054	(2018) Dynamin-Like Proteins of Endocytosis in Plants Are Coopted by Potyviruses To Enhance Virus Infection.
PMID	PMID:24725266	6	36	3702	AT4G37780,AT5G65790,AT5G23000,AT5G57620,AT3G49690,AT2G36890	MYB87,F6H11.100,RAX1,MYB36,RAX3,RAX2	1.41e-07	0.0035	(2014) Genome-wide characterization and comparative analysis of R2R3-MYB transcription factors shows the complexity of MYB-associated regulatory networks in Salvia miltiorrhiza.
PMID	PMID:21670303	4	7	3702	AT5G55660,AT5G63550,AT3G48710,AT4G26630	MDF20.10,MLE2.18,T8P19.220,DEK3	3.3e-07	0.0065	(2011) Four amino acids guide the assembly or disassembly of Arabidopsis histone H3.3-containing nucleosomes.
PMID	PMID:34254322	5	25	3702	AT5G62230,AT5G55660,AT5G63550,AT3G48710,AT4G26630	ERL1,MDF20.10,MLE2.18,T8P19.220,DEK3	7.3e-07	0.012	(2021) Establishing asymmetry: stomatal division and differentiation in plants.
PMID	PMID:37834462	3	4	3702	AT2G39800,AT3G55610,AT2G31260	P5CSA,P5CSB,ATG9	6.32e-06	0.0416	(2023) Integrated Multi-Omics Analyses Reveal That Autophagy-Mediated Cellular Metabolism Is Required for the Initiation of Pollen Germination.
PMID	PMID:35887066	4	18	3702	AT2G23320,AT2G24570,AT4G24240,AT4G31550	WRKY15,WRKY17,WRKY7,WRKY11	6.96e-06	0.0416	(2022) CALMODULIN1 and WRKY53 Function in Plant Defense by Negatively Regulating the Jasmonic Acid Biosynthesis Pathway in Arabidopsis.
PMID	PMID:34063907	4	14	3702	AT5G42080,AT1G14830,AT3G60190,AT3G49590	DRP1A,DRP1C,DRP1E,ATG13A	2.96e-06	0.0416	(2021) Contribution of Massive Mitochondrial Fusion and Subsequent Fission in the Plant Life Cycle to the Integrity of the Mitochondrion and Its Genome.
PMID	PMID:32459558	3	3	3702	AT5G28290,AT3G04810,AT1G54510	NEK3,NEK2,NEK1	3.63e-06	0.0416	(2020) Nek8445, a protein kinase required for microtubule regulation and cytokinesis in Giardia lamblia.
PMID	PMID:22833665	3	3	3702	AT4G04610,AT4G21990,AT1G62180	APR1,APR3,APR2	3.63e-06	0.0416	(2012) Kinetic assays for determining in vitro APS reductase activity in plants without the use of radioactive substances.
PMID	PMID:22891817	3	4	3702	AT4G37070,AT4G37050,AT2G26560	PLP1,PLP3,PLP2	6.32e-06	0.0416	(2012) Identification and characterization of petiolule-like pulvinus mutants with abolished nyctinastic leaf movement in the model legume Medicago truncatula.
PMID	PMID:22957089	4	14	3702	AT3G44665,AT3G44620,AT3G63280,AT3G04810	A0A1I9LQL8,F4J355_ARATH,NEK4,NEK2	2.96e-06	0.0416	(2012) A unique Kelch domain phosphatase in Plasmodium regulates ookinete morphology, motility and invasion.
PMID	PMID:20053799	3	3	3702	AT4G37070,AT4G37060,AT4G37050	PLP1,PLP5,PLP3	3.63e-06	0.0416	(2010) Roles of Arabidopsis patatin-related phospholipases a in root development are related to auxin responses and phosphate deficiency.
PMID	PMID:18256049	3	4	3702	AT5G42080,AT1G14830,AT3G60190	DRP1A,DRP1C,DRP1E	6.32e-06	0.0416	(2008) Arabidopsis dynamin-like protein DRP1A: a null mutant with widespread defects in endocytosis, cellulose synthesis, cytokinesis, and cell expansion.
PMID	PMID:12226489	3	3	3702	AT4G37070,AT4G37050,AT2G26560	PLP1,PLP3,PLP2	3.63e-06	0.0416	(2002) Molecular identification of cytosolic, patatin-related phospholipases A from Arabidopsis with potential functions in plant signal transduction.
PMID	PMID:11467967	3	3	3702	AT4G04610,AT4G21990,AT1G62180	APR1,APR3,APR2	3.63e-06	0.0416	(2001) Regulation of the plant-type 5-adenylyl sulfate reductase by oxidative stress.
PMID	PMID:8917599	3	3	3702	AT4G04610,AT4G21990,AT1G62180	APR1,APR3,APR2	3.63e-06	0.0416	(1996) Three members of a novel small gene-family from Arabidopsis thaliana able to complement functionally an Escherichia coli mutant defective in PAPS reductase activity encode proteins with a thioredoxin-like domain and APS reductase activity.
RCTM	MAP-1482788	5	16	3702	AT4G37070,AT4G37060,AT4G37050,AT2G26560,AT5G43590	PLP1,PLP5,PLP3,PLP2,PLP4	1.09e-07	9.09e-05	Acyl chain remodelling of PC
RCTM	MAP-1482839	5	18	3702	AT4G37070,AT4G37060,AT4G37050,AT2G26560,AT5G43590	PLP1,PLP5,PLP3,PLP2,PLP4	1.78e-07	9.09e-05	Acyl chain remodelling of PE
RCTM	MAP-6811436	5	18	3702	AT4G37070,AT4G37060,AT4G37050,AT2G26560,AT5G43590	PLP1,PLP5,PLP3,PLP2,PLP4	1.78e-07	9.09e-05	COPI-independent Golgi-to-ER retrograde traffic
RCTM	MAP-2029485	5	29	3702	AT4G37070,AT4G37060,AT4G37050,AT2G26560,AT5G43590	PLP1,PLP5,PLP3,PLP2,PLP4	1.4e-06	0.00029	Role of phospholipids in phagocytosis
RCTM	MAP-113501	4	20	3702	AT5G28850,AT1G03960,AT5G28900,AT1G54450	B''BETA,B''EPSILON,B''GAMMA,B''DELTA	1e-05	0.0017	Inhibition of replication initiation of damaged DNA by RB1/E2F1
RCTM	MAP-113510	4	20	3702	AT5G28850,AT1G03960,AT5G28900,AT1G54450	B''BETA,B''EPSILON,B''GAMMA,B''DELTA	1e-05	0.0017	E2F mediated regulation of DNA replication
RCTM	MAP-69273	4	22	3702	AT5G28850,AT1G03960,AT5G28900,AT1G54450	B''BETA,B''EPSILON,B''GAMMA,B''DELTA	1.4e-05	0.0017	Cyclin A/B1/B2 associated events during G2/M transition
RCTM	MAP-2029480	5	64	3702	AT4G37070,AT4G37060,AT4G37050,AT2G26560,AT5G43590	PLP1,PLP5,PLP3,PLP2,PLP4	4.81e-05	0.0041	Fcgamma receptor (FCGR) dependent phagocytosis
RCTM	MAP-6803157	5	62	3702	AT4G39700,AT4G08570,AT1G22990,AT1G71050,AT5G17450	HIPP23,HIPP24,HIPP22,HIPP20,HIPP21	4.17e-05	0.0041	Antimicrobial peptides
RCTM	MAP-6803544	5	61	3702	AT4G39700,AT4G08570,AT1G22990,AT1G71050,AT5G17450	HIPP23,HIPP24,HIPP22,HIPP20,HIPP21	3.88e-05	0.0041	Ion influx/efflux at host-pathogen interface
RCTM	MAP-453274	5	88	3702	AT3G13330,AT5G28850,AT1G03960,AT5G28900,AT1G54450	PA200,B''BETA,B''EPSILON,B''GAMMA,B''DELTA	0.0002	0.0152	Mitotic G2-G2/M phases
RCTM	MAP-69275	5	88	3702	AT3G13330,AT5G28850,AT1G03960,AT5G28900,AT1G54450	PA200,B''BETA,B''EPSILON,B''GAMMA,B''DELTA	0.0002	0.0152	G2/M Transition
RCTM	MAP-450604	3	21	3702	AT4G10070,AT2G25970,AT1G33680	F28M11.1,F17H15.1,F14M2.18	0.00034	0.0219	KSRP (KHSRP) binds and destabilizes mRNA
RCTM	MAP-69231	4	58	3702	AT5G28850,AT1G03960,AT5G28900,AT1G54450	B''BETA,B''EPSILON,B''GAMMA,B''DELTA	0.00044	0.0266	Cyclin D associated events in G1
RCTM	MAP-69236	4	58	3702	AT5G28850,AT1G03960,AT5G28900,AT1G54450	B''BETA,B''EPSILON,B''GAMMA,B''DELTA	0.00044	0.0266	G1 Phase
RCTM	MAP-168249	15	994	3702	AT4G37070,AT4G37060,AT4G37050,AT2G26560,AT4G39700,AT4G08570,AT2G23420,AT2G28100,AT4G36940,AT5G37680,AT1G22990,AT5G67560,AT1G71050,AT5G43590,AT5G17450	PLP1,PLP5,PLP3,PLP2,HIPP23,HIPP24,NAPRT2,FUC1,NAPRT1,ARL8C,HIPP22,ARL8B,HIPP20,PLP4,HIPP21	0.00071	0.037	Innate Immune System
RCTM	MAP-9603798	3	28	3702	AT5G53540,AT3G04460,AT4G27680	MNC6.8,PEX12,T29A15.170	0.00073	0.037	Class I peroxisomal membrane protein import
NetworkNeighborAL	CL:20247	4	17	3702	AT5G28850,AT1G03960,AT5G28900,AT1G54450	B''BETA,B''EPSILON,B''GAMMA,B''DELTA	5.72e-06	0.0231	Protein phosphatase type 2A complex
NetworkNeighborAL	CL:38451	5	37	3702	AT5G62230,AT5G55660,AT5G07180,AT3G48710,AT4G26630	ERL1,MDF20.10,ERL2,T8P19.220,DEK3	4.12e-06	0.0231	Mixed, incl. Stomatal complex morphogenesis, and DEK C terminal domain
NetworkNeighborAL	CL:20619	4	25	3702	AT3G18770,AT3G19190,AT2G31260,AT3G49590	ATG13B,ATG2,ATG9,ATG13A	2.19e-05	0.0307	Autophagy - other
NetworkNeighborAL	CL:15791	3	11	3702	AT5G01630,AT4G00020,AT2G19560	BRCA2B,BRCA2A,EER5	6.38e-05	0.047	Mixed, incl. SAC3/GANP family, and BRCA2 repeat
NetworkNeighborAL	CL:38498	3	12	3702	AT5G55660,AT3G48710,AT4G26630	MDF20.10,T8P19.220,DEK3	7.95e-05	0.0495	Mixed, incl. DEK C terminal domain, and Cuticle pattern formation

## Sheet: Table S4
Table S4. Enrcihment obtained from A. thaliana genes inside orthogroups with lower scaled NS/S in terrestrial plants.
category	term	number_of_genes	number_of_genes_in_background	ncbiTaxonId	inputGenes	preferredNames	p_value	fdr	description
Process	GO:0009734	22	248	3702	AT3G04730,AT1G51950,AT3G15540,AT5G43700,AT1G15580,AT4G14560,AT3G23030,AT1G04250,AT1G04240,AT1G52830,AT3G23050,AT2G22670,AT5G65670,AT1G04100,AT4G28640,AT1G04550,AT2G33310,AT4G14550,AT3G16500,AT1G80390,AT5G25890,AT4G29080	IAA16,IAA18,IAA19,IAA4,IAA5,IAA1,IAA2,IAA17,IAA3,IAA6,IAA7,IAA8,IAA9,IAA10,IAA11,IAA12,IAA13,IAA14,IAA26,IAA15,IAA28,IAA27	3.72e-21	2.14e-17	Auxin-activated signaling pathway
Process	GO:0007165	33	1879	3702	AT3G10550,AT5G04540,AT3G04730,AT1G51950,AT3G15540,AT5G43700,AT1G15580,AT4G14560,AT3G23030,AT1G04250,AT2G26980,AT1G04240,AT1G52830,AT3G23050,AT2G22670,AT5G65670,AT1G04100,AT4G28640,AT1G04550,AT2G33310,AT4G14550,AT5G21326,AT3G16500,AT1G30270,AT1G53090,AT5G57630,AT1G80390,AT5G35410,AT3G15354,AT1G01140,AT4G24400,AT5G25890,AT4G29080	MTM1,MTM2,IAA16,IAA18,IAA19,IAA4,IAA5,IAA1,IAA2,IAA17,CIPK3,IAA3,IAA6,IAA7,IAA8,IAA9,IAA10,IAA11,IAA12,IAA13,IAA14,CIPK26,IAA26,CIPK23,SPA4,CIPK21,IAA15,CIPK24,SPA3,CIPK9,CIPK8,IAA28,IAA27	3.49e-11	5.03e-08	Signal transduction
Process	GO:0007154	34	2118	3702	AT3G10550,AT5G04540,AT3G04730,AT1G51950,AT3G15540,AT5G43700,AT1G15580,AT4G14560,AT3G23030,AT1G04250,AT2G26980,AT1G04240,AT1G52830,AT3G23050,AT2G22670,AT5G65670,AT1G04100,AT4G28640,AT1G04550,AT2G33310,AT4G14550,AT5G21326,AT3G16500,AT1G30270,AT1G53090,AT5G57630,AT1G33240,AT1G80390,AT5G35410,AT3G15354,AT1G01140,AT4G24400,AT5G25890,AT4G29080	MTM1,MTM2,IAA16,IAA18,IAA19,IAA4,IAA5,IAA1,IAA2,IAA17,CIPK3,IAA3,IAA6,IAA7,IAA8,IAA9,IAA10,IAA11,IAA12,IAA13,IAA14,CIPK26,IAA26,CIPK23,SPA4,CIPK21,GTL1,IAA15,CIPK24,SPA3,CIPK9,CIPK8,IAA28,IAA27	1.75e-10	1.68e-07	Cell communication
Process	GO:0042221	40	2960	3702	AT3G10550,AT3G04730,AT1G51950,AT3G15540,AT4G23030,AT5G43700,AT1G15580,AT4G14560,AT3G23030,AT1G04250,AT1G04240,AT1G52830,AT3G23050,AT2G22670,AT5G65670,AT1G04100,AT4G28640,AT1G04550,AT2G33310,AT4G14550,AT5G19700,AT3G16500,AT1G30270,AT4G26640,AT5G37500,AT4G33010,AT5G57630,AT1G33240,AT1G80390,AT5G41670,AT5G49130,AT1G71870,AT3G22490,AT1G01140,AT1G58340,AT4G24400,AT4G29140,AT5G25890,AT4G29080,AT2G38510	MTM1,IAA16,IAA18,IAA19,DTX49,IAA4,IAA5,IAA1,IAA2,IAA17,IAA3,IAA6,IAA7,IAA8,IAA9,IAA10,IAA11,IAA12,IAA13,IAA14,DTX52,IAA26,CIPK23,WRKY20,GORK,GLDP1,CIPK21,GTL1,IAA15,PGD3,DTX55,DTX54,RAB28,CIPK9,DTX48,CIPK8,DTX51,IAA28,IAA27,DTX53	4.47e-10	3.22e-07	Response to chemical
Process	GO:1990961	7	50	3702	AT4G23030,AT5G19700,AT5G49130,AT1G71870,AT1G58340,AT4G29140,AT2G38510	DTX49,DTX52,DTX55,DTX54,DTX48,DTX51,DTX53	9.02e-09	4.72e-06	Xenobiotic detoxification by transmembrane export across the plasma membrane
Process	GO:0006355	33	2386	3702	AT3G04730,AT1G51950,AT3G15540,AT5G07500,AT2G19810,AT2G25900,AT5G43700,AT1G15580,AT4G14560,AT3G23030,AT1G04250,AT1G04240,AT1G52830,AT3G23050,AT2G22670,AT5G65670,AT1G04100,AT4G28640,AT1G04550,AT2G33310,AT4G14550,AT1G76890,AT3G16500,AT4G26640,AT1G76880,AT1G33240,AT1G80390,AT5G47660,AT5G44260,AT4G29190,AT5G25890,AT4G29080,AT1G03790	IAA16,IAA18,IAA19,TZF6,OZF1,ATCTH,IAA4,IAA5,IAA1,IAA2,IAA17,IAA3,IAA6,IAA7,IAA8,IAA9,IAA10,IAA11,IAA12,IAA13,IAA14,GT-2,IAA26,WRKY20,F7O12.5,GTL1,IAA15,MNJ7.25,TZF5,OZF2,IAA28,IAA27,TZF4	1.38e-08	5.42e-06	Regulation of transcription, DNA-templated
Process	GO:0052324	5	12	3702	AT1G09790,AT3G29810,AT5G60920,AT5G15630,AT3G02210	COBL6,COBL2,COB,COBL4,COBL1	1.22e-08	5.42e-06	Plant-type cell wall cellulose biosynthetic process
Process	GO:0010215	5	17	3702	AT1G09790,AT3G29810,AT5G60920,AT5G15630,AT3G02210	COBL6,COBL2,COB,COBL4,COBL1	5.11e-08	1.34e-05	Cellulose microfibril organization
Process	GO:0006796	29	2064	3702	AT1G56130,AT1G56140,AT4G18640,AT5G45840,AT1G56120,AT1G56145,AT3G44620,AT3G10550,AT5G04540,AT2G41880,AT2G26980,AT1G11880,AT5G21326,AT5G35980,AT1G30270,AT1G53090,AT5G57630,AT5G41670,AT5G53890,AT3G02360,AT5G35410,AT3G15354,AT3G56050,AT3G57550,AT1G01140,AT1G64190,AT2G40270,AT4G24400,AT2G02220	F14G9.25,F14G9.24,MDIS2,MDIS1,T6H22.9,F4I3K4_ARATH,F4J355_ARATH,MTM1,MTM2,GK-1,CIPK3,AT1G11880,CIPK26,YAK1,CIPK23,SPA4,CIPK21,PGD3,PSKR2,PGD2,CIPK24,SPA3,F18O21.10,GK-2,CIPK9,PGD1,T3G21-2,CIPK8,PSKR1	9.33e-08	2.15e-05	Phosphate-containing compound metabolic process
Process	GO:0010033	28	1959	3702	AT3G04730,AT1G51950,AT3G15540,AT5G43700,AT1G15580,AT4G14560,AT3G23030,AT1G04250,AT1G04240,AT1G52830,AT3G23050,AT2G22670,AT5G65670,AT1G04100,AT4G28640,AT1G04550,AT2G33310,AT4G14550,AT3G16500,AT4G26640,AT5G37500,AT1G80390,AT5G41670,AT1G01140,AT1G58340,AT4G24400,AT5G25890,AT4G29080	IAA16,IAA18,IAA19,IAA4,IAA5,IAA1,IAA2,IAA17,IAA3,IAA6,IAA7,IAA8,IAA9,IAA10,IAA11,IAA12,IAA13,IAA14,IAA26,WRKY20,GORK,IAA15,PGD3,CIPK9,DTX48,CIPK8,IAA28,IAA27	1.15e-07	2.56e-05	Response to organic substance
Process	GO:0051716	37	3214	3702	AT3G10550,AT4G24790,AT5G04540,AT3G04730,AT1G51950,AT3G15540,AT5G43700,AT1G15580,AT4G14560,AT3G23030,AT1G04250,AT2G26980,AT1G04240,AT1G52830,AT3G23050,AT2G22670,AT5G65670,AT1G04100,AT4G28640,AT1G04550,AT2G33310,AT4G14550,AT5G21326,AT3G16500,AT1G30270,AT1G53090,AT5G57630,AT1G29690,AT1G33240,AT1G80390,AT1G48050,AT5G35410,AT3G15354,AT1G01140,AT4G24400,AT5G25890,AT4G29080	MTM1,F22K18.10,MTM2,IAA16,IAA18,IAA19,IAA4,IAA5,IAA1,IAA2,IAA17,CIPK3,IAA3,IAA6,IAA7,IAA8,IAA9,IAA10,IAA11,IAA12,IAA13,IAA14,CIPK26,IAA26,CIPK23,SPA4,CIPK21,CAD1,GTL1,IAA15,KU80,CIPK24,SPA3,CIPK9,CIPK8,IAA28,IAA27	1.66e-07	3e-05	Cellular response to stimulus
Process	GO:0010556	34	2796	3702	AT3G04730,AT1G51950,AT3G15540,AT5G07500,AT2G19810,AT2G25900,AT5G43700,AT1G15580,AT4G14560,AT3G23030,AT1G04250,AT1G04240,AT1G52830,AT3G23050,AT2G22670,AT5G65670,AT1G04100,AT4G28640,AT1G04550,AT2G33310,AT4G14550,AT1G76890,AT3G16500,AT4G26640,AT1G76880,AT1G33240,AT1G80390,AT5G47660,AT5G44260,AT4G29190,AT5G25890,AT4G29080,AT1G54680,AT1G03790	IAA16,IAA18,IAA19,TZF6,OZF1,ATCTH,IAA4,IAA5,IAA1,IAA2,IAA17,IAA3,IAA6,IAA7,IAA8,IAA9,IAA10,IAA11,IAA12,IAA13,IAA14,GT-2,IAA26,WRKY20,F7O12.5,GTL1,IAA15,MNJ7.25,TZF5,OZF2,IAA28,IAA27,T22H22.11,TZF4	1.75e-07	3.06e-05	Regulation of macromolecule biosynthetic process
Process	GO:0006468	20	1099	3702	AT1G56130,AT1G56140,AT4G18640,AT5G45840,AT1G56120,AT1G56145,AT2G26980,AT5G21326,AT5G35980,AT1G30270,AT1G53090,AT5G57630,AT5G53890,AT5G35410,AT3G15354,AT3G56050,AT1G01140,AT2G40270,AT4G24400,AT2G02220	F14G9.25,F14G9.24,MDIS2,MDIS1,T6H22.9,F4I3K4_ARATH,CIPK3,CIPK26,YAK1,CIPK23,SPA4,CIPK21,PSKR2,CIPK24,SPA3,F18O21.10,CIPK9,T3G21-2,CIPK8,PSKR1	2.61e-07	4.13e-05	Protein phosphorylation
Process	GO:0009725	24	1543	3702	AT3G04730,AT1G51950,AT3G15540,AT5G43700,AT1G15580,AT4G14560,AT3G23030,AT1G04250,AT1G04240,AT1G52830,AT3G23050,AT2G22670,AT5G65670,AT1G04100,AT4G28640,AT1G04550,AT2G33310,AT4G14550,AT3G16500,AT5G37500,AT1G80390,AT1G58340,AT5G25890,AT4G29080	IAA16,IAA18,IAA19,IAA4,IAA5,IAA1,IAA2,IAA17,IAA3,IAA6,IAA7,IAA8,IAA9,IAA10,IAA11,IAA12,IAA13,IAA14,IAA26,GORK,IAA15,DTX48,IAA28,IAA27	2.46e-07	4.13e-05	Response to hormone
Process	GO:0050789	54	5971	3702	AT3G10550,AT5G04540,AT3G04730,AT1G51950,AT3G15540,AT5G07500,AT2G19810,AT2G25900,AT5G43700,AT1G15580,AT4G14560,AT3G23030,AT1G04250,AT2G26980,AT1G04240,AT1G52830,AT3G23050,AT2G22670,AT5G65670,AT1G04100,AT4G28640,AT1G04550,AT2G33310,AT4G14550,AT1G76890,AT5G21326,AT3G16500,AT5G35980,AT1G30270,AT4G26640,AT5G37500,AT1G53090,AT5G57630,AT1G76880,AT1G29690,AT1G33240,AT1G80390,AT5G47660,AT5G44260,AT5G35410…	MTM1,MTM2,IAA16,IAA18,IAA19,TZF6,OZF1,ATCTH,IAA4,IAA5,IAA1,IAA2,IAA17,CIPK3,IAA3,IAA6,IAA7,IAA8,IAA9,IAA10,IAA11,IAA12,IAA13,IAA14,GT-2,CIPK26,IAA26,YAK1,CIPK23,WRKY20,GORK,SPA4,CIPK21,F7O12.5,CAD1,GTL1,IAA15,MNJ7.25,TZF5,CIPK24,SPA3,OZF2,GK-2,SKOR,SEC,CIPK9,DTX48,CIPK8,DTX51,IAA28,IAA27,T22H22.11,PSKR1,TZF4	2.53e-07	4.13e-05	Regulation of biological process
Process	GO:0070887	25	1661	3702	AT3G10550,AT3G04730,AT1G51950,AT3G15540,AT5G43700,AT1G15580,AT4G14560,AT3G23030,AT1G04250,AT1G04240,AT1G52830,AT3G23050,AT2G22670,AT5G65670,AT1G04100,AT4G28640,AT1G04550,AT2G33310,AT4G14550,AT3G16500,AT5G57630,AT1G33240,AT1G80390,AT5G25890,AT4G29080	MTM1,IAA16,IAA18,IAA19,IAA4,IAA5,IAA1,IAA2,IAA17,IAA3,IAA6,IAA7,IAA8,IAA9,IAA10,IAA11,IAA12,IAA13,IAA14,IAA26,CIPK21,GTL1,IAA15,IAA28,IAA27	2.44e-07	4.13e-05	Cellular response to chemical stimulus
Process	GO:0031326	34	2880	3702	AT3G04730,AT1G51950,AT3G15540,AT5G07500,AT2G19810,AT2G25900,AT5G43700,AT1G15580,AT4G14560,AT3G23030,AT1G04250,AT1G04240,AT1G52830,AT3G23050,AT2G22670,AT5G65670,AT1G04100,AT4G28640,AT1G04550,AT2G33310,AT4G14550,AT1G76890,AT3G16500,AT4G26640,AT1G76880,AT1G33240,AT1G80390,AT5G47660,AT5G44260,AT4G29190,AT5G25890,AT4G29080,AT1G54680,AT1G03790	IAA16,IAA18,IAA19,TZF6,OZF1,ATCTH,IAA4,IAA5,IAA1,IAA2,IAA17,IAA3,IAA6,IAA7,IAA8,IAA9,IAA10,IAA11,IAA12,IAA13,IAA14,GT-2,IAA26,WRKY20,F7O12.5,GTL1,IAA15,MNJ7.25,TZF5,OZF2,IAA28,IAA27,T22H22.11,TZF4	3.5e-07	5.27e-05	Regulation of cellular biosynthetic process
Process	GO:0050794	49	5300	3702	AT3G10550,AT5G04540,AT3G04730,AT1G51950,AT3G15540,AT5G07500,AT2G19810,AT2G25900,AT5G43700,AT1G15580,AT4G14560,AT3G23030,AT1G04250,AT2G26980,AT1G04240,AT1G52830,AT3G23050,AT2G22670,AT5G65670,AT1G04100,AT4G28640,AT1G04550,AT2G33310,AT4G14550,AT1G76890,AT5G21326,AT3G16500,AT5G35980,AT1G30270,AT4G26640,AT5G37500,AT1G53090,AT5G57630,AT1G76880,AT1G29690,AT1G33240,AT1G80390,AT5G47660,AT5G44260,AT5G35410…	MTM1,MTM2,IAA16,IAA18,IAA19,TZF6,OZF1,ATCTH,IAA4,IAA5,IAA1,IAA2,IAA17,CIPK3,IAA3,IAA6,IAA7,IAA8,IAA9,IAA10,IAA11,IAA12,IAA13,IAA14,GT-2,CIPK26,IAA26,YAK1,CIPK23,WRKY20,GORK,SPA4,CIPK21,F7O12.5,CAD1,GTL1,IAA15,MNJ7.25,TZF5,CIPK24,SPA3,OZF2,SKOR,CIPK9,CIPK8,IAA28,IAA27,T22H22.11,TZF4	6.84e-07	9.39e-05	Regulation of cellular process
Process	GO:0065007	57	6689	3702	AT3G10550,AT5G04540,AT3G04730,AT1G51950,AT3G15540,AT5G07500,AT2G19810,AT2G25900,AT5G43700,AT1G15580,AT4G14560,AT3G23030,AT1G04250,AT2G26980,AT1G04240,AT1G52830,AT3G23050,AT2G22670,AT5G65670,AT1G04100,AT4G28640,AT1G04550,AT2G33310,AT4G14550,AT1G76890,AT5G19700,AT5G21326,AT3G16500,AT5G35980,AT1G30270,AT4G26640,AT5G37500,AT1G53090,AT5G57630,AT1G76880,AT1G29690,AT1G33240,AT1G80390,AT5G47660,AT5G44260…	MTM1,MTM2,IAA16,IAA18,IAA19,TZF6,OZF1,ATCTH,IAA4,IAA5,IAA1,IAA2,IAA17,CIPK3,IAA3,IAA6,IAA7,IAA8,IAA9,IAA10,IAA11,IAA12,IAA13,IAA14,GT-2,DTX52,CIPK26,IAA26,YAK1,CIPK23,WRKY20,GORK,SPA4,CIPK21,F7O12.5,CAD1,GTL1,IAA15,MNJ7.25,TZF5,CIPK24,RAB28,SPA3,OZF2,GK-2,SKOR,SEC,CIPK9,F1O13.7,DTX48,CIPK8,DTX51,IAA28,IAA27,T22H22.11,PSKR1,TZF4	7.19e-07	9.63e-05	Biological regulation
Process	GO:0005986	4	13	3702	AT4G10120,AT1G04920,AT5G20280,AT5G11110	SPS4,SPS3-2,SPS1-2,SPS2-2	1.04e-06	0.00014	Sucrose biosynthetic process
Process	GO:0010468	34	3061	3702	AT3G04730,AT1G51950,AT3G15540,AT5G07500,AT2G19810,AT2G25900,AT5G43700,AT1G15580,AT4G14560,AT3G23030,AT1G04250,AT1G04240,AT1G52830,AT3G23050,AT2G22670,AT5G65670,AT1G04100,AT4G28640,AT1G04550,AT2G33310,AT4G14550,AT1G76890,AT3G16500,AT4G26640,AT1G76880,AT1G33240,AT1G80390,AT5G47660,AT5G44260,AT4G29190,AT5G25890,AT4G29080,AT1G54680,AT1G03790	IAA16,IAA18,IAA19,TZF6,OZF1,ATCTH,IAA4,IAA5,IAA1,IAA2,IAA17,IAA3,IAA6,IAA7,IAA8,IAA9,IAA10,IAA11,IAA12,IAA13,IAA14,GT-2,IAA26,WRKY20,F7O12.5,GTL1,IAA15,MNJ7.25,TZF5,OZF2,IAA28,IAA27,T22H22.11,TZF4	1.41e-06	0.00018	Regulation of gene expression
Process	GO:0016310	22	1465	3702	AT1G56130,AT1G56140,AT4G18640,AT5G45840,AT1G56120,AT1G56145,AT2G41880,AT2G26980,AT5G21326,AT5G35980,AT1G30270,AT1G53090,AT5G57630,AT5G53890,AT5G35410,AT3G15354,AT3G56050,AT3G57550,AT1G01140,AT2G40270,AT4G24400,AT2G02220	F14G9.25,F14G9.24,MDIS2,MDIS1,T6H22.9,F4I3K4_ARATH,GK-1,CIPK3,CIPK26,YAK1,CIPK23,SPA4,CIPK21,PSKR2,CIPK24,SPA3,F18O21.10,GK-2,CIPK9,T3G21-2,CIPK8,PSKR1	1.49e-06	0.00019	Phosphorylation
Process	GO:0034637	9	223	3702	AT4G10120,AT1G09790,AT3G29810,AT1G04920,AT5G20280,AT5G60920,AT5G11110,AT5G15630,AT3G02210	SPS4,COBL6,COBL2,SPS3-2,SPS1-2,COB,SPS2-2,COBL4,COBL1	1.54e-06	0.00019	Cellular carbohydrate biosynthetic process
Process	GO:0009987	90	13552	3702	AT1G56130,AT1G56140,AT4G18640,AT5G45840,AT1G56120,AT1G56145,AT3G44620,AT3G10550,AT3G18770,AT4G10120,AT4G24790,AT5G04540,AT1G09790,AT3G04730,AT1G51950,AT3G15540,AT4G20070,AT5G07500,AT2G26080,AT4G23030,AT5G45130,AT5G43700,AT1G15580,AT4G14560,AT3G23030,AT2G41880,AT1G04250,AT2G26980,AT1G04240,AT1G52830,AT3G23050,AT2G22670,AT5G65670,AT1G04100,AT4G28640,AT1G04550,AT2G33310,AT4G14550,AT5G19700,AT1G11880…	F14G9.25,F14G9.24,MDIS2,MDIS1,T6H22.9,F4I3K4_ARATH,F4J355_ARATH,MTM1,ATG13B,SPS4,F22K18.10,MTM2,COBL6,IAA16,IAA18,IAA19,AAH,TZF6,GLDP2,DTX49,RABF2A,IAA4,IAA5,IAA1,IAA2,GK-1,IAA17,CIPK3,IAA3,IAA6,IAA7,IAA8,IAA9,IAA10,IAA11,IAA12,IAA13,IAA14,DTX52,AT1G11880,CIPK26,COBL2,IAA26,YAK1,SPS3-2,F6F22.10,CIPK23,GORK,GLDP1,SPA4,SPS1-2,CIPK21,COB,F7O12.5,CAD1,GTL1,IAA15,CHLP,PGD3,DTX55,PSKR2,KU80,PGD2,SPS2-2…	2.18e-06	0.00026	Cellular process
Process	GO:0044262	12	475	3702	AT4G10120,AT1G09790,AT3G29810,AT1G04920,AT5G20280,AT5G60920,AT5G41670,AT3G02360,AT5G11110,AT5G15630,AT1G64190,AT3G02210	SPS4,COBL6,COBL2,SPS3-2,SPS1-2,COB,PGD3,PGD2,SPS2-2,COBL4,PGD1,COBL1	3.23e-06	0.00038	Cellular carbohydrate metabolic process
Process	GO:0046177	3	4	3702	AT5G41670,AT3G02360,AT1G64190	PGD3,PGD2,PGD1	3.45e-06	0.0004	D-gluconate catabolic process
Process	GO:0031323	35	3384	3702	AT3G04730,AT1G51950,AT3G15540,AT5G07500,AT2G19810,AT2G25900,AT5G43700,AT1G15580,AT4G14560,AT3G23030,AT1G04250,AT1G04240,AT1G52830,AT3G23050,AT2G22670,AT5G65670,AT1G04100,AT4G28640,AT1G04550,AT2G33310,AT4G14550,AT1G76890,AT3G16500,AT4G26640,AT1G76880,AT1G29690,AT1G33240,AT1G80390,AT5G47660,AT5G44260,AT4G29190,AT5G25890,AT4G29080,AT1G54680,AT1G03790	IAA16,IAA18,IAA19,TZF6,OZF1,ATCTH,IAA4,IAA5,IAA1,IAA2,IAA17,IAA3,IAA6,IAA7,IAA8,IAA9,IAA10,IAA11,IAA12,IAA13,IAA14,GT-2,IAA26,WRKY20,F7O12.5,CAD1,GTL1,IAA15,MNJ7.25,TZF5,OZF2,IAA28,IAA27,T22H22.11,TZF4	4.72e-06	0.0005	Regulation of cellular metabolic process
Process	GO:0050896	52	6206	3702	AT3G10550,AT4G24790,AT5G04540,AT3G04730,AT1G51950,AT3G15540,AT2G19810,AT4G23030,AT5G43700,AT1G15580,AT4G14560,AT3G23030,AT1G04250,AT2G26980,AT1G04240,AT1G52830,AT3G23050,AT2G22670,AT5G65670,AT1G04100,AT4G28640,AT1G04550,AT2G33310,AT4G14550,AT5G19700,AT5G21326,AT3G16500,AT1G30270,AT4G26640,AT5G37500,AT4G33010,AT1G53090,AT5G57630,AT5G60920,AT1G29690,AT1G33240,AT1G80390,AT5G41670,AT5G49130,AT1G48050…	MTM1,F22K18.10,MTM2,IAA16,IAA18,IAA19,OZF1,DTX49,IAA4,IAA5,IAA1,IAA2,IAA17,CIPK3,IAA3,IAA6,IAA7,IAA8,IAA9,IAA10,IAA11,IAA12,IAA13,IAA14,DTX52,CIPK26,IAA26,CIPK23,WRKY20,GORK,GLDP1,SPA4,CIPK21,COB,CAD1,GTL1,IAA15,PGD3,DTX55,KU80,CIPK24,DTX54,RAB28,SPA3,CIPK9,DTX48,CIPK8,DTX51,IAA28,IAA27,DTX53,PSKR1	5.4e-06	0.00057	Response to stimulus
Process	GO:0051171	34	3272	3702	AT3G04730,AT1G51950,AT3G15540,AT5G07500,AT2G19810,AT2G25900,AT5G43700,AT1G15580,AT4G14560,AT3G23030,AT1G04250,AT1G04240,AT1G52830,AT3G23050,AT2G22670,AT5G65670,AT1G04100,AT4G28640,AT1G04550,AT2G33310,AT4G14550,AT1G76890,AT3G16500,AT4G26640,AT1G76880,AT1G33240,AT1G80390,AT5G47660,AT5G44260,AT4G29190,AT5G25890,AT4G29080,AT1G54680,AT1G03790	IAA16,IAA18,IAA19,TZF6,OZF1,ATCTH,IAA4,IAA5,IAA1,IAA2,IAA17,IAA3,IAA6,IAA7,IAA8,IAA9,IAA10,IAA11,IAA12,IAA13,IAA14,GT-2,IAA26,WRKY20,F7O12.5,GTL1,IAA15,MNJ7.25,TZF5,OZF2,IAA28,IAA27,T22H22.11,TZF4	6.12e-06	0.00063	Regulation of nitrogen compound metabolic process
Process	GO:0080090	34	3346	3702	AT3G04730,AT1G51950,AT3G15540,AT5G07500,AT2G19810,AT2G25900,AT5G43700,AT1G15580,AT4G14560,AT3G23030,AT1G04250,AT1G04240,AT1G52830,AT3G23050,AT2G22670,AT5G65670,AT1G04100,AT4G28640,AT1G04550,AT2G33310,AT4G14550,AT1G76890,AT3G16500,AT4G26640,AT1G76880,AT1G33240,AT1G80390,AT5G47660,AT5G44260,AT4G29190,AT5G25890,AT4G29080,AT1G54680,AT1G03790	IAA16,IAA18,IAA19,TZF6,OZF1,ATCTH,IAA4,IAA5,IAA1,IAA2,IAA17,IAA3,IAA6,IAA7,IAA8,IAA9,IAA10,IAA11,IAA12,IAA13,IAA14,GT-2,IAA26,WRKY20,F7O12.5,GTL1,IAA15,MNJ7.25,TZF5,OZF2,IAA28,IAA27,T22H22.11,TZF4	9.89e-06	0.00098	Regulation of primary metabolic process
Process	GO:0009051	3	14	3702	AT5G41670,AT3G02360,AT1G64190	PGD3,PGD2,PGD1	6.47e-05	0.0056	Pentose-phosphate shunt, oxidative branch
Process	GO:0036211	28	2780	3702	AT1G56130,AT1G56140,AT4G18640,AT5G45840,AT1G56120,AT1G56145,AT3G44620,AT2G26980,AT1G11880,AT3G29270,AT5G21326,AT2G01735,AT1G63170,AT5G35980,AT1G30270,AT4G11680,AT1G53090,AT5G57630,AT5G53890,AT5G35410,AT3G15354,AT1G12760,AT3G56050,AT3G04240,AT1G01140,AT2G40270,AT4G24400,AT2G02220	F14G9.25,F14G9.24,MDIS2,MDIS1,T6H22.9,F4I3K4_ARATH,F4J355_ARATH,CIPK3,AT1G11880,Q84JZ7_ARATH,CIPK26,RIE1,F16M19.7,YAK1,CIPK23,T5C23.110,SPA4,CIPK21,PSKR2,CIPK24,SPA3,T12C24.29,F18O21.10,SEC,CIPK9,T3G21-2,CIPK8,PSKR1	8.63e-05	0.0071	Protein modification process
Process	GO:0043412	30	3138	3702	AT1G56130,AT1G56140,AT4G18640,AT5G45840,AT1G56120,AT1G56145,AT3G44620,AT2G26980,AT1G11880,AT3G29270,AT5G21326,AT2G01735,AT1G63170,AT5G35980,AT2G19870,AT1G30270,AT4G11680,AT1G53090,AT5G57630,AT5G53890,AT5G35410,AT3G26410,AT3G15354,AT1G12760,AT3G56050,AT3G04240,AT1G01140,AT2G40270,AT4G24400,AT2G02220	F14G9.25,F14G9.24,MDIS2,MDIS1,T6H22.9,F4I3K4_ARATH,F4J355_ARATH,CIPK3,AT1G11880,Q84JZ7_ARATH,CIPK26,RIE1,F16M19.7,YAK1,F6F22.10,CIPK23,T5C23.110,SPA4,CIPK21,PSKR2,CIPK24,TRM11-2,SPA3,T12C24.29,F18O21.10,SEC,CIPK9,T3G21-2,CIPK8,PSKR1	0.00012	0.0092	Macromolecule modification
Process	GO:0000423	2	2	3702	AT3G18770,AT3G49590	ATG13B,ATG13A	0.00013	0.0101	Mitophagy
Process	GO:0071836	2	4	3702	AT5G20280,AT5G11110	SPS1-2,SPS2-2	0.00032	0.0234	Nectar secretion
Process	GO:0019464	2	6	3702	AT2G26080,AT4G33010	GLDP2,GLDP1	0.0006	0.0404	Glycine decarboxylation via glycine cleavage system
Process	GO:0034727	2	6	3702	AT3G18770,AT3G49590	ATG13B,ATG13A	0.0006	0.0404	Piecemeal microautophagy of the nucleus
Process	GO:0071214	6	219	3702	AT3G10550,AT1G53090,AT5G57630,AT1G33240,AT1G48050,AT3G15354	MTM1,SPA4,CIPK21,GTL1,KU80,SPA3	0.00068	0.0445	Cellular response to abiotic stimulus
Component	GO:0110165	120	19483	3702	AT4G21570,AT1G56130,AT1G56140,AT4G18640,AT5G45840,AT1G56120,AT1G56145,AT1G11120,AT1G11200,AT3G44620,AT3G10550,AT3G18770,AT4G10120,AT4G24790,AT5G04540,AT1G09790,AT2G44920,AT1G05150,AT3G04730,AT1G51950,AT3G15540,AT4G20070,AT5G07500,AT2G26080,AT2G19810,AT2G25900,AT4G23030,AT5G45130,AT5G43700,AT1G15580,AT4G14560,AT3G23030,AT2G41880,AT1G04250,AT5G27290,AT3G07570,AT1G58007,AT1G04240,AT1G52830,AT3G23050…	F17L22.30,F14G9.25,F14G9.24,MDIS2,MDIS1,T6H22.9,F4I3K4_ARATH,T19D16.22,T28P6.25,F4J355_ARATH,MTM1,ATG13B,SPS4,F22K18.10,MTM2,COBL6,T13E15.7,YUP8H12.24,IAA16,IAA18,IAA19,AAH,TZF6,GLDP2,OZF1,ATCTH,DTX49,RABF2A,IAA4,IAA5,IAA1,IAA2,GK-1,IAA17,F21A20.3,MLP3.2,Q1G3Y6_ARATH,IAA3,IAA6,IAA7,IAA8,IAA9,IAA10,IAA11,IAA12,IAA13,IAA14,GT-2,T6B20.10,DTX52,Q5Q0I0_ARATH,AT1G11880,Q84JZ7_ARATH,CIPK26,Q8GUK5_ARATH,…	5.1e-10	5.13e-07	Cellular anatomical entity
Component	GO:0016020	62	8287	3702	AT4G21570,AT1G56130,AT1G56140,AT4G18640,AT5G45840,AT1G56120,AT1G56145,AT1G11120,AT1G11200,AT3G10550,AT3G18770,AT1G09790,AT2G44920,AT1G05150,AT2G19810,AT4G23030,AT5G45130,AT5G27290,AT3G07570,AT1G58007,AT5G19700,AT1G09812,AT1G11880,AT3G29270,AT5G21326,AT2G01735,AT3G29810,AT1G63170,AT2G32450,AT1G30270,AT3G61180,AT4G11680,AT5G37500,AT4G33010,AT5G20280,AT5G57630,AT5G60920,AT1G69330,AT1G68070,AT1G74470…	F17L22.30,F14G9.25,F14G9.24,MDIS2,MDIS1,T6H22.9,F4I3K4_ARATH,T19D16.22,T28P6.25,MTM1,ATG13B,COBL6,T13E15.7,YUP8H12.24,OZF1,DTX49,RABF2A,F21A20.3,MLP3.2,Q1G3Y6_ARATH,DTX52,Q5Q0I0_ARATH,AT1G11880,Q84JZ7_ARATH,CIPK26,RIE1,COBL2,F16M19.7,T32F6.3,CIPK23,T20K12.80,T5C23.110,GORK,GLDP1,SPS1-2,CIPK21,COB,F10D13.3,T23K23.8,CHLP,DTX55,PSKR2,CIPK24,DTX54,COBL4,T12C24.29,F18O21.10,OZF2,AVT6E,SKOR,ATG13A,F1O1…	1.6e-05	0.0081	Membrane
Component	GO:0031902	4	33	3702	AT5G19700,AT1G58340,AT4G19640,AT4G29140	DTX52,DTX48,RABF2B,DTX51	2.67e-05	0.009	Late endosome membrane
Component	GO:0043231	81	12391	3702	AT1G56145,AT3G44620,AT3G10550,AT3G18770,AT4G24790,AT2G44920,AT1G05150,AT3G04730,AT1G51950,AT3G15540,AT4G20070,AT5G07500,AT2G26080,AT5G45130,AT5G43700,AT1G15580,AT4G14560,AT3G23030,AT1G04250,AT5G27290,AT1G04240,AT1G52830,AT3G23050,AT2G22670,AT5G65670,AT1G04100,AT4G28640,AT1G04550,AT2G33310,AT4G14550,AT1G76890,AT2G30550,AT5G19700,AT1G11880,AT5G21326,AT3G05625,AT5G27980,AT3G29810,AT3G16500,AT1G04920…	F4I3K4_ARATH,F4J355_ARATH,MTM1,ATG13B,F22K18.10,T13E15.7,YUP8H12.24,IAA16,IAA18,IAA19,AAH,TZF6,GLDP2,RABF2A,IAA4,IAA5,IAA1,IAA2,IAA17,F21A20.3,IAA3,IAA6,IAA7,IAA8,IAA9,IAA10,IAA11,IAA12,IAA13,IAA14,GT-2,T6B20.10,DTX52,AT1G11880,CIPK26,Q8GUK5_ARATH,F15F15.50,COBL2,IAA26,SPS3-2,ALDH2B7,T32F6.3,F6F22.10,CIPK23,WRKY20,T20K12.80,T5C23.110,PLA-I{gamma}1,GORK,GLDP1,SPA4,CIPK21,F7O12.5,GTL1,F5D21.19,IAA1…	4.24e-05	0.0107	Intracellular membrane-bounded organelle
Component	GO:0005622	89	14335	3702	AT1G56145,AT3G44620,AT3G10550,AT3G18770,AT4G10120,AT4G24790,AT5G04540,AT2G44920,AT1G05150,AT3G04730,AT1G51950,AT3G15540,AT4G20070,AT5G07500,AT2G26080,AT2G25900,AT5G45130,AT5G43700,AT1G15580,AT4G14560,AT3G23030,AT2G41880,AT1G04250,AT5G27290,AT1G04240,AT1G52830,AT3G23050,AT2G22670,AT5G65670,AT1G04100,AT4G28640,AT1G04550,AT2G33310,AT4G14550,AT1G76890,AT2G30550,AT5G19700,AT1G11880,AT5G21326,AT3G05625…	F4I3K4_ARATH,F4J355_ARATH,MTM1,ATG13B,SPS4,F22K18.10,MTM2,T13E15.7,YUP8H12.24,IAA16,IAA18,IAA19,AAH,TZF6,GLDP2,ATCTH,RABF2A,IAA4,IAA5,IAA1,IAA2,GK-1,IAA17,F21A20.3,IAA3,IAA6,IAA7,IAA8,IAA9,IAA10,IAA11,IAA12,IAA13,IAA14,GT-2,T6B20.10,DTX52,AT1G11880,CIPK26,Q8GUK5_ARATH,F15F15.50,COBL2,IAA26,YAK1,SPS3-2,ALDH2B7,T32F6.3,F6F22.10,CIPK23,WRKY20,T20K12.80,T5C23.110,PLA-I{gamma}1,GORK,GLDP1,SPA4,CIPK21,…	8.11e-05	0.0136	Intracellular anatomical structure
Component	GO:0043229	82	12866	3702	AT1G56145,AT3G44620,AT3G10550,AT3G18770,AT4G24790,AT2G44920,AT1G05150,AT3G04730,AT1G51950,AT3G15540,AT4G20070,AT5G07500,AT2G26080,AT5G45130,AT5G43700,AT1G15580,AT4G14560,AT3G23030,AT1G04250,AT5G27290,AT1G04240,AT1G52830,AT3G23050,AT2G22670,AT5G65670,AT1G04100,AT4G28640,AT1G04550,AT2G33310,AT4G14550,AT1G76890,AT2G30550,AT5G19700,AT1G11880,AT5G21326,AT3G05625,AT5G27980,AT3G29810,AT3G16500,AT1G04920…	F4I3K4_ARATH,F4J355_ARATH,MTM1,ATG13B,F22K18.10,T13E15.7,YUP8H12.24,IAA16,IAA18,IAA19,AAH,TZF6,GLDP2,RABF2A,IAA4,IAA5,IAA1,IAA2,IAA17,F21A20.3,IAA3,IAA6,IAA7,IAA8,IAA9,IAA10,IAA11,IAA12,IAA13,IAA14,GT-2,T6B20.10,DTX52,AT1G11880,CIPK26,Q8GUK5_ARATH,F15F15.50,COBL2,IAA26,SPS3-2,ALDH2B7,T32F6.3,F6F22.10,CIPK23,WRKY20,T20K12.80,T5C23.110,PLA-I{gamma}1,GORK,GLDP1,SPA4,CIPK21,F7O12.5,GTL1,F5D21.19,IAA1…	0.0001	0.0146	Intracellular organelle
Component	GO:0010008	6	171	3702	AT3G10550,AT5G45130,AT5G19700,AT1G58340,AT4G19640,AT4G29140	MTM1,RABF2A,DTX52,DTX48,RABF2B,DTX51	0.00019	0.0212	Endosome membrane
Component	GO:1990316	2	3	3702	AT3G18770,AT3G49590	ATG13B,ATG13A	0.00021	0.0216	Atg1/ULK1 kinase complex
Component	GO:0005960	2	5	3702	AT2G26080,AT4G33010	GLDP2,GLDP1	0.00045	0.041	Glycine cleavage complex
Component	GO:0031410	12	814	3702	AT3G10550,AT3G18770,AT1G05150,AT5G45130,AT5G19700,AT5G41670,AT3G02360,AT3G49590,AT1G64190,AT1G58340,AT4G19640,AT4G29140	MTM1,ATG13B,YUP8H12.24,RABF2A,DTX52,PGD3,PGD2,ATG13A,PGD1,DTX48,RABF2B,DTX51	0.00051	0.0428	Cytoplasmic vesicle
Function	GO:0003700	31	1642	3702	AT3G04730,AT1G51950,AT3G15540,AT5G07500,AT2G19810,AT2G25900,AT5G43700,AT1G15580,AT4G14560,AT3G23030,AT1G04250,AT1G04240,AT1G52830,AT3G23050,AT5G65670,AT1G04100,AT1G04550,AT2G33310,AT4G14550,AT1G76890,AT3G16500,AT4G26640,AT1G76880,AT1G33240,AT1G80390,AT5G47660,AT5G44260,AT4G29190,AT5G25890,AT4G29080,AT1G03790	IAA16,IAA18,IAA19,TZF6,OZF1,ATCTH,IAA4,IAA5,IAA1,IAA2,IAA17,IAA3,IAA6,IAA7,IAA9,IAA10,IAA12,IAA13,IAA14,GT-2,IAA26,WRKY20,F7O12.5,GTL1,IAA15,MNJ7.25,TZF5,OZF2,IAA28,IAA27,TZF4	2.7e-11	8.63e-08	DNA-binding transcription factor activity
Function	GO:0042802	16	411	3702	AT3G04730,AT3G15540,AT5G43700,AT4G14560,AT3G23030,AT1G04250,AT1G04240,AT1G52830,AT1G04100,AT1G04550,AT2G33310,AT3G16500,AT1G53090,AT3G15354,AT5G25890,AT4G29080	IAA16,IAA19,IAA4,IAA1,IAA2,IAA17,IAA3,IAA6,IAA10,IAA12,IAA13,IAA26,SPA4,SPA3,IAA28,IAA27	1.77e-10	2.83e-07	Identical protein binding
Function	GO:0046524	4	4	3702	AT4G10120,AT1G04920,AT5G20280,AT5G11110	SPS4,SPS3-2,SPS1-2,SPS2-2	3.15e-08	2.51e-05	Sucrose-phosphate synthase activity
Function	GO:0042910	7	74	3702	AT4G23030,AT5G19700,AT5G49130,AT1G71870,AT1G58340,AT4G29140,AT2G38510	DTX49,DTX52,DTX55,DTX54,DTX48,DTX51,DTX53	1.08e-07	6.91e-05	Xenobiotic transmembrane transporter activity
Function	GO:0004672	20	1106	3702	AT1G56130,AT1G56140,AT4G18640,AT5G45840,AT1G56120,AT1G56145,AT2G26980,AT5G21326,AT5G35980,AT1G30270,AT1G53090,AT5G57630,AT5G53890,AT5G35410,AT3G15354,AT3G56050,AT1G01140,AT2G40270,AT4G24400,AT2G02220	F14G9.25,F14G9.24,MDIS2,MDIS1,T6H22.9,F4I3K4_ARATH,CIPK3,CIPK26,YAK1,CIPK23,SPA4,CIPK21,PSKR2,CIPK24,SPA3,F18O21.10,CIPK9,T3G21-2,CIPK8,PSKR1	2.88e-07	0.00015	Protein kinase activity
Function	GO:0016301	22	1436	3702	AT1G56130,AT1G56140,AT4G18640,AT5G45840,AT1G56120,AT1G56145,AT2G41880,AT2G26980,AT5G21326,AT5G35980,AT1G30270,AT1G53090,AT5G57630,AT5G53890,AT5G35410,AT3G15354,AT3G56050,AT3G57550,AT1G01140,AT2G40270,AT4G24400,AT2G02220	F14G9.25,F14G9.24,MDIS2,MDIS1,T6H22.9,F4I3K4_ARATH,GK-1,CIPK3,CIPK26,YAK1,CIPK23,SPA4,CIPK21,PSKR2,CIPK24,SPA3,F18O21.10,GK-2,CIPK9,T3G21-2,CIPK8,PSKR1	1.08e-06	0.00049	Kinase activity
Function	GO:0097159	62	7733	3702	AT1G56130,AT1G56140,AT4G18640,AT5G45840,AT1G56120,AT1G56145,AT4G24790,AT3G04730,AT5G07500,AT2G26080,AT2G19810,AT2G25900,AT5G45130,AT5G43700,AT4G14560,AT3G23030,AT2G41880,AT5G27290,AT2G26980,AT1G04240,AT1G52830,AT3G23050,AT5G65670,AT1G04100,AT1G04550,AT4G14550,AT1G76890,AT5G21326,AT5G35980,AT2G19870,AT1G30270,AT4G26640,AT4G33010,AT1G53090,AT5G57630,AT1G76880,AT1G33240,AT5G41670,AT5G47660,AT5G44260…	F14G9.25,F14G9.24,MDIS2,MDIS1,T6H22.9,F4I3K4_ARATH,F22K18.10,IAA16,TZF6,GLDP2,OZF1,ATCTH,RABF2A,IAA4,IAA1,IAA2,GK-1,F21A20.3,CIPK3,IAA3,IAA6,IAA7,IAA9,IAA10,IAA12,IAA14,GT-2,CIPK26,YAK1,F6F22.10,CIPK23,WRKY20,GLDP1,SPA4,CIPK21,F7O12.5,GTL1,PGD3,MNJ7.25,TZF5,PSKR2,KU80,PGD2,CIPK24,TRM11-2,SPA3,F18O21.10,OZF2,GK-2,CIPK9,PGD1,T3G21-2,MP3,RABF2B,CIPK8,ALDH2B4,IAA28,IAA27,ABCG3,T22H22.11,PSKR1,TZF4	1.4e-06	0.00056	Organic cyclic compound binding
Function	GO:0004616	3	3	3702	AT5G41670,AT3G02360,AT1G64190	PGD3,PGD2,PGD1	1.98e-06	0.0007	Phosphogluconate dehydrogenase (decarboxylating) activity
Function	GO:0000166	34	3154	3702	AT1G56130,AT1G56140,AT4G18640,AT5G45840,AT1G56120,AT1G56145,AT4G24790,AT2G26080,AT5G45130,AT2G41880,AT5G27290,AT2G26980,AT5G21326,AT5G35980,AT1G30270,AT1G53090,AT5G57630,AT5G41670,AT5G53890,AT1G48050,AT3G02360,AT5G35410,AT3G15354,AT3G56050,AT3G57550,AT1G01140,AT1G64190,AT2G40270,AT4G19640,AT4G24400,AT3G48000,AT2G28070,AT1G54680,AT2G02220	F14G9.25,F14G9.24,MDIS2,MDIS1,T6H22.9,F4I3K4_ARATH,F22K18.10,GLDP2,RABF2A,GK-1,F21A20.3,CIPK3,CIPK26,YAK1,CIPK23,SPA4,CIPK21,PGD3,PSKR2,KU80,PGD2,CIPK24,SPA3,F18O21.10,GK-2,CIPK9,PGD1,T3G21-2,RABF2B,CIPK8,ALDH2B4,ABCG3,T22H22.11,PSKR1	2.74e-06	0.00071	Nucleotide binding
Function	GO:0005524	29	2421	3702	AT1G56130,AT1G56140,AT4G18640,AT5G45840,AT1G56120,AT1G56145,AT4G24790,AT2G26080,AT2G41880,AT5G27290,AT2G26980,AT5G21326,AT5G35980,AT1G30270,AT1G53090,AT5G57630,AT5G53890,AT1G48050,AT5G35410,AT3G15354,AT3G56050,AT3G57550,AT1G01140,AT2G40270,AT4G24400,AT3G48000,AT2G28070,AT1G54680,AT2G02220	F14G9.25,F14G9.24,MDIS2,MDIS1,T6H22.9,F4I3K4_ARATH,F22K18.10,GLDP2,GK-1,F21A20.3,CIPK3,CIPK26,YAK1,CIPK23,SPA4,CIPK21,PSKR2,KU80,CIPK24,SPA3,F18O21.10,GK-2,CIPK9,T3G21-2,CIPK8,ALDH2B4,ABCG3,T22H22.11,PSKR1	2.41e-06	0.00071	ATP binding
Function	GO:0016772	23	1663	3702	AT1G56130,AT1G56140,AT4G18640,AT5G45840,AT1G56120,AT1G56145,AT4G24790,AT2G41880,AT2G26980,AT5G21326,AT5G35980,AT1G30270,AT1G53090,AT5G57630,AT5G53890,AT5G35410,AT3G15354,AT3G56050,AT3G57550,AT1G01140,AT2G40270,AT4G24400,AT2G02220	F14G9.25,F14G9.24,MDIS2,MDIS1,T6H22.9,F4I3K4_ARATH,F22K18.10,GK-1,CIPK3,CIPK26,YAK1,CIPK23,SPA4,CIPK21,PSKR2,CIPK24,SPA3,F18O21.10,GK-2,CIPK9,T3G21-2,CIPK8,PSKR1	3.28e-06	0.00071	Transferase activity, transferring phosphorus-containing groups
Function	GO:0035639	31	2691	3702	AT1G56130,AT1G56140,AT4G18640,AT5G45840,AT1G56120,AT1G56145,AT4G24790,AT2G26080,AT5G45130,AT2G41880,AT5G27290,AT2G26980,AT5G21326,AT5G35980,AT1G30270,AT1G53090,AT5G57630,AT5G53890,AT1G48050,AT5G35410,AT3G15354,AT3G56050,AT3G57550,AT1G01140,AT2G40270,AT4G19640,AT4G24400,AT3G48000,AT2G28070,AT1G54680,AT2G02220	F14G9.25,F14G9.24,MDIS2,MDIS1,T6H22.9,F4I3K4_ARATH,F22K18.10,GLDP2,RABF2A,GK-1,F21A20.3,CIPK3,CIPK26,YAK1,CIPK23,SPA4,CIPK21,PSKR2,KU80,CIPK24,SPA3,F18O21.10,GK-2,CIPK9,T3G21-2,RABF2B,CIPK8,ALDH2B4,ABCG3,T22H22.11,PSKR1	2.23e-06	0.00071	Purine ribonucleoside triphosphate binding
Function	GO:0106310	14	658	3702	AT1G56130,AT1G56140,AT4G18640,AT5G45840,AT2G26980,AT5G21326,AT5G35980,AT1G30270,AT5G57630,AT5G53890,AT5G35410,AT1G01140,AT4G24400,AT2G02220	F14G9.25,F14G9.24,MDIS2,MDIS1,CIPK3,CIPK26,YAK1,CIPK23,CIPK21,PSKR2,CIPK24,CIPK9,CIPK8,PSKR1	3.35e-06	0.00071	Protein serine kinase activity
Function	GO:1901363	61	7692	3702	AT1G56130,AT1G56140,AT4G18640,AT5G45840,AT1G56120,AT1G56145,AT4G24790,AT3G04730,AT5G07500,AT2G26080,AT2G19810,AT2G25900,AT5G45130,AT5G43700,AT4G14560,AT3G23030,AT2G41880,AT5G27290,AT2G26980,AT1G04240,AT1G52830,AT3G23050,AT5G65670,AT1G04100,AT1G04550,AT4G14550,AT1G76890,AT5G21326,AT5G35980,AT2G19870,AT1G30270,AT4G26640,AT4G33010,AT1G53090,AT5G57630,AT1G76880,AT1G33240,AT5G41670,AT5G47660,AT5G44260…	F14G9.25,F14G9.24,MDIS2,MDIS1,T6H22.9,F4I3K4_ARATH,F22K18.10,IAA16,TZF6,GLDP2,OZF1,ATCTH,RABF2A,IAA4,IAA1,IAA2,GK-1,F21A20.3,CIPK3,IAA3,IAA6,IAA7,IAA9,IAA10,IAA12,IAA14,GT-2,CIPK26,YAK1,F6F22.10,CIPK23,WRKY20,GLDP1,SPA4,CIPK21,F7O12.5,GTL1,PGD3,MNJ7.25,TZF5,PSKR2,KU80,PGD2,CIPK24,TRM11-2,SPA3,F18O21.10,OZF2,GK-2,CIPK9,PGD1,T3G21-2,RABF2B,CIPK8,ALDH2B4,IAA28,IAA27,ABCG3,T22H22.11,PSKR1,TZF4	2.74e-06	0.00071	Heterocyclic compound binding
Function	GO:0036094	35	3370	3702	AT1G56130,AT1G56140,AT4G18640,AT5G45840,AT1G56120,AT1G56145,AT4G24790,AT2G26080,AT5G45130,AT2G41880,AT5G27290,AT2G26980,AT5G21326,AT5G35980,AT1G30270,AT4G33010,AT1G53090,AT5G57630,AT5G41670,AT5G53890,AT1G48050,AT3G02360,AT5G35410,AT3G15354,AT3G56050,AT3G57550,AT1G01140,AT1G64190,AT2G40270,AT4G19640,AT4G24400,AT3G48000,AT2G28070,AT1G54680,AT2G02220	F14G9.25,F14G9.24,MDIS2,MDIS1,T6H22.9,F4I3K4_ARATH,F22K18.10,GLDP2,RABF2A,GK-1,F21A20.3,CIPK3,CIPK26,YAK1,CIPK23,GLDP1,SPA4,CIPK21,PGD3,PSKR2,KU80,PGD2,CIPK24,SPA3,F18O21.10,GK-2,CIPK9,PGD1,T3G21-2,RABF2B,CIPK8,ALDH2B4,ABCG3,T22H22.11,PSKR1	4.31e-06	0.00076	Small molecule binding
Function	GO:0004674	16	879	3702	AT1G56130,AT1G56140,AT4G18640,AT5G45840,AT1G56120,AT1G56145,AT2G26980,AT5G21326,AT5G35980,AT1G30270,AT5G57630,AT5G53890,AT5G35410,AT1G01140,AT4G24400,AT2G02220	F14G9.25,F14G9.24,MDIS2,MDIS1,T6H22.9,F4I3K4_ARATH,CIPK3,CIPK26,YAK1,CIPK23,CIPK21,PSKR2,CIPK24,CIPK9,CIPK8,PSKR1	4.57e-06	0.00077	Protein serine/threonine kinase activity
Function	GO:0032555	31	2801	3702	AT1G56130,AT1G56140,AT4G18640,AT5G45840,AT1G56120,AT1G56145,AT4G24790,AT2G26080,AT5G45130,AT2G41880,AT5G27290,AT2G26980,AT5G21326,AT5G35980,AT1G30270,AT1G53090,AT5G57630,AT5G53890,AT1G48050,AT5G35410,AT3G15354,AT3G56050,AT3G57550,AT1G01140,AT2G40270,AT4G19640,AT4G24400,AT3G48000,AT2G28070,AT1G54680,AT2G02220	F14G9.25,F14G9.24,MDIS2,MDIS1,T6H22.9,F4I3K4_ARATH,F22K18.10,GLDP2,RABF2A,GK-1,F21A20.3,CIPK3,CIPK26,YAK1,CIPK23,SPA4,CIPK21,PSKR2,KU80,CIPK24,SPA3,F18O21.10,GK-2,CIPK9,T3G21-2,RABF2B,CIPK8,ALDH2B4,ABCG3,T22H22.11,PSKR1	5.07e-06	0.00081	Purine ribonucleotide binding
Function	GO:0016157	3	9	3702	AT4G10120,AT1G04920,AT5G11110	SPS4,SPS3-2,SPS2-2	2.13e-05	0.0026	Sucrose synthase activity
Function	GO:0047714	3	9	3702	AT2G30550,AT1G06800,AT1G51440	T6B20.10,PLA-I{gamma}1,F5D21.19	2.13e-05	0.0026	Galactolipase activity
Function	GO:0140096	29	2777	3702	AT1G56130,AT1G56140,AT4G18640,AT5G45840,AT1G56120,AT1G56145,AT3G44620,AT3G10550,AT5G04540,AT5G27290,AT2G26980,AT3G29270,AT5G21326,AT5G35980,AT1G30270,AT1G53090,AT5G57630,AT1G69330,AT5G53890,AT5G35410,AT3G15354,AT1G12760,AT3G56050,AT3G04240,AT1G01140,AT2G40270,AT4G24400,AT1G54680,AT2G02220	F14G9.25,F14G9.24,MDIS2,MDIS1,T6H22.9,F4I3K4_ARATH,F4J355_ARATH,MTM1,MTM2,F21A20.3,CIPK3,Q84JZ7_ARATH,CIPK26,YAK1,CIPK23,SPA4,CIPK21,F10D13.3,PSKR2,CIPK24,SPA3,T12C24.29,F18O21.10,SEC,CIPK9,T3G21-2,CIPK8,T22H22.11,PSKR1	3.26e-05	0.0037	Catalytic activity, acting on a protein
Function	GO:0016740	37	4061	3702	AT1G56130,AT1G56140,AT4G18640,AT5G45840,AT1G56120,AT1G56145,AT4G10120,AT4G24790,AT2G41880,AT2G26980,AT1G11880,AT3G29270,AT5G21326,AT2G01735,AT1G63170,AT5G35980,AT1G04920,AT2G19870,AT1G30270,AT4G11680,AT1G53090,AT5G20280,AT5G57630,AT1G69330,AT5G53890,AT5G11110,AT5G35410,AT3G26410,AT3G15354,AT1G12760,AT3G56050,AT3G57550,AT3G04240,AT1G01140,AT2G40270,AT4G24400,AT2G02220	F14G9.25,F14G9.24,MDIS2,MDIS1,T6H22.9,F4I3K4_ARATH,SPS4,F22K18.10,GK-1,CIPK3,AT1G11880,Q84JZ7_ARATH,CIPK26,RIE1,F16M19.7,YAK1,SPS3-2,F6F22.10,CIPK23,T5C23.110,SPA4,SPS1-2,CIPK21,F10D13.3,PSKR2,SPS2-2,CIPK24,TRM11-2,SPA3,T12C24.29,F18O21.10,GK-2,SEC,CIPK9,T3G21-2,CIPK8,PSKR1	4.04e-05	0.0045	Transferase activity
Function	GO:0043168	32	3280	3702	AT1G56130,AT1G56140,AT4G18640,AT5G45840,AT1G56120,AT1G56145,AT4G24790,AT2G26080,AT5G45130,AT2G41880,AT5G27290,AT2G26980,AT5G21326,AT5G35980,AT1G30270,AT4G33010,AT1G53090,AT5G57630,AT5G53890,AT1G48050,AT5G35410,AT3G15354,AT3G56050,AT3G57550,AT1G01140,AT2G40270,AT4G19640,AT4G24400,AT3G48000,AT2G28070,AT1G54680,AT2G02220	F14G9.25,F14G9.24,MDIS2,MDIS1,T6H22.9,F4I3K4_ARATH,F22K18.10,GLDP2,RABF2A,GK-1,F21A20.3,CIPK3,CIPK26,YAK1,CIPK23,GLDP1,SPA4,CIPK21,PSKR2,KU80,CIPK24,SPA3,F18O21.10,GK-2,CIPK9,T3G21-2,RABF2B,CIPK8,ALDH2B4,ABCG3,T22H22.11,PSKR1	4.37e-05	0.0047	Anion binding
Function	GO:0000976	15	954	3702	AT3G04730,AT5G43700,AT4G14560,AT3G23030,AT1G04240,AT1G52830,AT3G23050,AT5G65670,AT1G04100,AT1G04550,AT4G14550,AT4G26640,AT1G76880,AT5G25890,AT4G29080	IAA16,IAA4,IAA1,IAA2,IAA3,IAA6,IAA7,IAA9,IAA10,IAA12,IAA14,WRKY20,F7O12.5,IAA28,IAA27	4.91e-05	0.0051	Transcription cis-regulatory region binding
Function	GO:0003690	16	1100	3702	AT3G04730,AT5G43700,AT4G14560,AT3G23030,AT1G04240,AT1G52830,AT3G23050,AT5G65670,AT1G04100,AT1G04550,AT4G14550,AT4G26640,AT1G76880,AT1G48050,AT5G25890,AT4G29080	IAA16,IAA4,IAA1,IAA2,IAA3,IAA6,IAA7,IAA9,IAA10,IAA12,IAA14,WRKY20,F7O12.5,KU80,IAA28,IAA27	6.73e-05	0.0063	Double-stranded DNA binding
Function	GO:0015297	7	209	3702	AT4G23030,AT5G19700,AT5G49130,AT1G71870,AT1G58340,AT4G29140,AT2G38510	DTX49,DTX52,DTX55,DTX54,DTX48,DTX51,DTX53	7.29e-05	0.0067	Antiporter activity
Function	GO:0004806	3	15	3702	AT2G30550,AT1G06800,AT1G51440	T6B20.10,PLA-I{gamma}1,F5D21.19	7.74e-05	0.0069	Triglyceride lipase activity
Function	GO:0043565	17	1257	3702	AT3G04730,AT5G43700,AT4G14560,AT3G23030,AT1G04240,AT1G52830,AT3G23050,AT5G65670,AT1G04100,AT1G04550,AT4G14550,AT4G26640,AT1G76880,AT1G33240,AT1G48050,AT5G25890,AT4G29080	IAA16,IAA4,IAA1,IAA2,IAA3,IAA6,IAA7,IAA9,IAA10,IAA12,IAA14,WRKY20,F7O12.5,GTL1,KU80,IAA28,IAA27	9.46e-05	0.0082	Sequence-specific DNA binding
Function	GO:0003677	26	2517	3702	AT4G24790,AT3G04730,AT5G07500,AT2G19810,AT2G25900,AT5G43700,AT4G14560,AT3G23030,AT1G04240,AT1G52830,AT3G23050,AT5G65670,AT1G04100,AT1G04550,AT4G14550,AT1G76890,AT4G26640,AT1G76880,AT1G33240,AT5G47660,AT5G44260,AT1G48050,AT4G29190,AT5G25890,AT4G29080,AT1G03790	F22K18.10,IAA16,TZF6,OZF1,ATCTH,IAA4,IAA1,IAA2,IAA3,IAA6,IAA7,IAA9,IAA10,IAA12,IAA14,GT-2,WRKY20,F7O12.5,GTL1,MNJ7.25,TZF5,KU80,OZF2,IAA28,IAA27,TZF4	0.00011	0.009	DNA binding
Function	GO:0008970	3	17	3702	AT2G30550,AT1G06800,AT1G51440	T6B20.10,PLA-I{gamma}1,F5D21.19	0.00011	0.009	Phospholipase A1 activity
Function	GO:0005488	76	11632	3702	AT1G56130,AT1G56140,AT4G18640,AT5G45840,AT1G56120,AT1G56145,AT4G24790,AT1G05150,AT3G04730,AT3G15540,AT4G20070,AT5G07500,AT2G26080,AT2G19810,AT2G25900,AT5G45130,AT5G43700,AT4G14560,AT3G23030,AT2G41880,AT1G04250,AT5G27290,AT3G07570,AT2G26980,AT1G04240,AT1G52830,AT3G23050,AT5G65670,AT1G04100,AT1G04550,AT2G33310,AT4G14550,AT1G76890,AT3G29270,AT5G21326,AT2G01735,AT3G16500,AT1G63170,AT5G35980,AT2G32450…	F14G9.25,F14G9.24,MDIS2,MDIS1,T6H22.9,F4I3K4_ARATH,F22K18.10,YUP8H12.24,IAA16,IAA19,AAH,TZF6,GLDP2,OZF1,ATCTH,RABF2A,IAA4,IAA1,IAA2,GK-1,IAA17,F21A20.3,MLP3.2,CIPK3,IAA3,IAA6,IAA7,IAA9,IAA10,IAA12,IAA13,IAA14,GT-2,Q84JZ7_ARATH,CIPK26,RIE1,IAA26,F16M19.7,YAK1,T32F6.3,F6F22.10,CIPK23,WRKY20,T5C23.110,GLDP1,SPA4,CIPK21,F10D13.3,F7O12.5,GTL1,PGD3,MNJ7.25,TZF5,PSKR2,KU80,PGD2,CIPK24,TRM11-2,SPA3,T12C2…	0.00012	0.0093	Binding
Function	GO:0004375	2	2	3702	AT2G26080,AT4G33010	GLDP2,GLDP1	0.00013	0.0101	Glycine dehydrogenase (decarboxylating) activity
Function	GO:0008114	2	2	3702	AT5G41670,AT1G64190	PGD3,PGD1	0.00013	0.0101	Phosphogluconate 2-dehydrogenase activity
Function	GO:0016594	2	2	3702	AT2G26080,AT4G33010	GLDP2,GLDP1	0.00013	0.0101	Glycine binding
Function	GO:0052629	2	2	3702	AT3G10550,AT5G04540	MTM1,MTM2	0.00013	0.0101	phosphatidylinositol-3,5-bisphosphate 3-phosphatase activity
Function	GO:0004385	2	3	3702	AT2G41880,AT3G57550	GK-1,GK-2	0.00021	0.0149	Guanylate kinase activity
Function	GO:0004438	2	3	3702	AT3G10550,AT5G04540	MTM1,MTM2	0.00021	0.0149	phosphatidylinositol-3-phosphatase activity
Function	GO:0043167	49	6562	3702	AT1G56130,AT1G56140,AT4G18640,AT5G45840,AT1G56120,AT1G56145,AT4G24790,AT1G05150,AT4G20070,AT5G07500,AT2G26080,AT2G19810,AT2G25900,AT5G45130,AT2G41880,AT5G27290,AT3G07570,AT2G26980,AT3G29270,AT5G21326,AT2G01735,AT1G63170,AT5G35980,AT2G32450,AT1G30270,AT4G26640,AT4G11680,AT4G33010,AT1G53090,AT5G57630,AT1G69330,AT5G44260,AT5G53890,AT1G48050,AT5G35410,AT3G15354,AT1G12760,AT3G56050,AT4G29190,AT3G57550…	F14G9.25,F14G9.24,MDIS2,MDIS1,T6H22.9,F4I3K4_ARATH,F22K18.10,YUP8H12.24,AAH,TZF6,GLDP2,OZF1,ATCTH,RABF2A,GK-1,F21A20.3,MLP3.2,CIPK3,Q84JZ7_ARATH,CIPK26,RIE1,F16M19.7,YAK1,T32F6.3,CIPK23,WRKY20,T5C23.110,GLDP1,SPA4,CIPK21,F10D13.3,TZF5,PSKR2,KU80,CIPK24,SPA3,T12C24.29,F18O21.10,OZF2,GK-2,CIPK9,T3G21-2,RABF2B,CIPK8,ALDH2B4,ABCG3,T22H22.11,PSKR1,TZF4	0.00026	0.0173	Ion binding
Function	GO:0005267	3	24	3702	AT1G30270,AT5G37500,AT3G02850	CIPK23,GORK,SKOR	0.00027	0.0175	Potassium channel activity
Function	GO:0015271	2	7	3702	AT5G37500,AT3G02850	GORK,SKOR	0.00076	0.0479	Outward rectifier potassium channel activity
Keyword	KW-0678	24	242	3702	AT3G04730,AT1G51950,AT3G15540,AT5G43700,AT1G15580,AT4G14560,AT3G23030,AT1G04250,AT1G04240,AT1G52830,AT3G23050,AT2G22670,AT5G65670,AT1G04100,AT4G28640,AT1G04550,AT2G33310,AT4G14550,AT3G16500,AT1G33240,AT1G80390,AT5G25890,AT4G29080,AT1G03790	IAA16,IAA18,IAA19,IAA4,IAA5,IAA1,IAA2,IAA17,IAA3,IAA6,IAA7,IAA8,IAA9,IAA10,IAA11,IAA12,IAA13,IAA14,IAA26,GTL1,IAA15,IAA28,IAA27,TZF4	4.39e-24	1.41e-21	Repressor
Keyword	KW-0927	22	174	3702	AT3G04730,AT1G51950,AT3G15540,AT5G43700,AT1G15580,AT4G14560,AT3G23030,AT1G04250,AT1G04240,AT1G52830,AT3G23050,AT2G22670,AT5G65670,AT1G04100,AT4G28640,AT1G04550,AT2G33310,AT4G14550,AT3G16500,AT1G80390,AT5G25890,AT4G29080	IAA16,IAA18,IAA19,IAA4,IAA5,IAA1,IAA2,IAA17,IAA3,IAA6,IAA7,IAA8,IAA9,IAA10,IAA11,IAA12,IAA13,IAA14,IAA26,IAA15,IAA28,IAA27	3.02e-24	1.41e-21	Auxin signaling pathway
Keyword	KW-0805	27	2058	3702	AT3G04730,AT1G51950,AT3G15540,AT5G07500,AT5G43700,AT1G15580,AT4G14560,AT3G23030,AT1G04250,AT1G04240,AT1G52830,AT3G23050,AT2G22670,AT5G65670,AT1G04100,AT4G28640,AT1G04550,AT2G33310,AT4G14550,AT1G76890,AT3G16500,AT4G26640,AT1G33240,AT1G80390,AT5G25890,AT4G29080,AT1G03790	IAA16,IAA18,IAA19,TZF6,IAA4,IAA5,IAA1,IAA2,IAA17,IAA3,IAA6,IAA7,IAA8,IAA9,IAA10,IAA11,IAA12,IAA13,IAA14,GT-2,IAA26,WRKY20,GTL1,IAA15,IAA28,IAA27,TZF4	1.07e-06	0.00017	Transcription regulation
Keyword	KW-0570	3	3	3702	AT5G41670,AT3G02360,AT1G64190	PGD3,PGD2,PGD1	1.98e-06	0.00023	Pentose shunt
Keyword	KW-0311	3	4	3702	AT5G41670,AT3G02360,AT1G64190	PGD3,PGD2,PGD1	3.45e-06	0.00027	Gluconate utilization
Keyword	KW-0597	23	1780	3702	AT1G56130,AT1G56140,AT5G45840,AT4G10120,AT4G14560,AT1G04250,AT1G04240,AT5G65670,AT5G21326,AT5G35980,AT1G04920,AT1G30270,AT5G20280,AT5G57630,AT1G33240,AT5G53890,AT5G11110,AT5G35410,AT1G01140,AT3G49590,AT4G24400,AT2G28070,AT2G02220	F14G9.25,F14G9.24,MDIS1,SPS4,IAA1,IAA17,IAA3,IAA9,CIPK26,YAK1,SPS3-2,CIPK23,SPS1-2,CIPK21,GTL1,PSKR2,SPS2-2,CIPK24,CIPK9,ATG13A,CIPK8,ABCG3,PSKR1	9.87e-06	0.00066	Phosphoprotein
Keyword	KW-0723	14	747	3702	AT1G56130,AT1G56140,AT4G18640,AT5G45840,AT2G26980,AT5G21326,AT5G35980,AT1G30270,AT5G57630,AT5G53890,AT5G35410,AT1G01140,AT4G24400,AT2G02220	F14G9.25,F14G9.24,MDIS2,MDIS1,CIPK3,CIPK26,YAK1,CIPK23,CIPK21,PSKR2,CIPK24,CIPK9,CIPK8,PSKR1	1.37e-05	0.0008	Serine/threonine-protein kinase
Keyword	KW-0539	36	3817	3702	AT3G04730,AT1G51950,AT3G15540,AT5G07500,AT5G43700,AT1G15580,AT4G14560,AT3G23030,AT1G04250,AT1G04240,AT1G52830,AT3G23050,AT2G22670,AT5G65670,AT1G04100,AT4G28640,AT1G04550,AT2G33310,AT4G14550,AT1G76890,AT5G27980,AT3G16500,AT4G26640,AT1G53090,AT1G33240,AT1G80390,AT1G48050,AT5G35410,AT3G22500,AT3G22490,AT3G15354,AT1G01140,AT2G24940,AT5G25890,AT4G29080,AT1G03790	IAA16,IAA18,IAA19,TZF6,IAA4,IAA5,IAA1,IAA2,IAA17,IAA3,IAA6,IAA7,IAA8,IAA9,IAA10,IAA11,IAA12,IAA13,IAA14,GT-2,F15F15.50,IAA26,WRKY20,SPA4,GTL1,IAA15,KU80,CIPK24,ECP31,RAB28,SPA3,CIPK9,MP3,IAA28,IAA27,TZF4	2.56e-05	0.0013	Nucleus
Keyword	KW-0418	18	1325	3702	AT1G56130,AT1G56140,AT4G18640,AT5G45840,AT1G56120,AT1G56145,AT2G41880,AT2G26980,AT5G21326,AT5G35980,AT1G30270,AT5G57630,AT5G53890,AT5G35410,AT3G57550,AT1G01140,AT4G24400,AT2G02220	F14G9.25,F14G9.24,MDIS2,MDIS1,T6H22.9,F4I3K4_ARATH,GK-1,CIPK3,CIPK26,YAK1,CIPK23,CIPK21,PSKR2,CIPK24,GK-2,CIPK9,CIPK8,PSKR1	5.47e-05	0.0025	Kinase
Keyword	KW-0631	3	16	3702	AT1G30270,AT5G37500,AT3G02850	CIPK23,GORK,SKOR	9.16e-05	0.0039	Potassium channel
Keyword	KW-0967	6	178	3702	AT3G10550,AT5G45130,AT5G19700,AT1G58340,AT4G19640,AT4G29140	MTM1,RABF2A,DTX52,DTX48,RABF2B,DTX51	0.00023	0.0091	Endosome
Keyword	KW-0336	5	115	3702	AT1G09790,AT3G29810,AT5G60920,AT5G15630,AT3G02210	COBL6,COBL2,COB,COBL4,COBL1	0.00026	0.0092	GPI-anchor
Keyword	KW-0808	31	3498	3702	AT1G56130,AT1G56140,AT4G18640,AT5G45840,AT1G56120,AT1G56145,AT4G10120,AT2G41880,AT2G26980,AT1G11880,AT5G21326,AT2G01735,AT1G63170,AT5G35980,AT1G04920,AT2G19870,AT1G30270,AT4G11680,AT1G53090,AT5G20280,AT5G57630,AT5G53890,AT5G11110,AT5G35410,AT3G15354,AT1G12760,AT3G57550,AT3G04240,AT1G01140,AT4G24400,AT2G02220	F14G9.25,F14G9.24,MDIS2,MDIS1,T6H22.9,F4I3K4_ARATH,SPS4,GK-1,CIPK3,AT1G11880,CIPK26,RIE1,F16M19.7,YAK1,SPS3-2,F6F22.10,CIPK23,T5C23.110,SPA4,SPS1-2,CIPK21,PSKR2,SPS2-2,CIPK24,SPA3,T12C24.29,GK-2,SEC,CIPK9,CIPK8,PSKR1	0.00034	0.0113	Transferase
Keyword	KW-0464	8	370	3702	AT4G20070,AT2G26980,AT5G21326,AT1G30270,AT5G57630,AT5G35410,AT1G01140,AT4G24400	AAH,CIPK3,CIPK26,CIPK23,CIPK21,CIPK24,CIPK9,CIPK8	0.00042	0.0129	Manganese
Keyword	KW-0547	23	2334	3702	AT1G56130,AT1G56140,AT4G18640,AT5G45840,AT4G24790,AT5G45130,AT2G41880,AT2G26980,AT5G21326,AT5G35980,AT1G30270,AT1G53090,AT5G57630,AT5G53890,AT1G48050,AT5G35410,AT3G15354,AT3G57550,AT1G01140,AT4G19640,AT4G24400,AT2G28070,AT2G02220	F14G9.25,F14G9.24,MDIS2,MDIS1,F22K18.10,RABF2A,GK-1,CIPK3,CIPK26,YAK1,CIPK23,SPA4,CIPK21,PSKR2,KU80,CIPK24,SPA3,GK-2,CIPK9,RABF2B,CIPK8,ABCG3,PSKR1	0.00056	0.0163	Nucleotide-binding
Keyword	KW-1003	14	1203	3702	AT1G56130,AT5G45840,AT1G09790,AT5G21326,AT3G29810,AT1G30270,AT5G60920,AT5G53890,AT5G15630,AT3G56050,AT2G40270,AT4G19640,AT3G02210,AT2G02220	F14G9.25,MDIS1,COBL6,CIPK26,COBL2,CIPK23,COB,PSKR2,COBL4,F18O21.10,T3G21-2,RABF2B,COBL1,PSKR1	0.0017	0.0466	Cell membrane
KEGG	ath04075	22	289	3702	AT3G04730,AT1G51950,AT3G15540,AT5G43700,AT1G15580,AT4G14560,AT3G23030,AT1G04250,AT1G04240,AT1G52830,AT3G23050,AT2G22670,AT5G65670,AT1G04100,AT4G28640,AT1G04550,AT2G33310,AT4G14550,AT3G16500,AT1G80390,AT5G25890,AT4G29080	IAA16,IAA18,IAA19,IAA4,IAA5,IAA1,IAA2,IAA17,IAA3,IAA6,IAA7,IAA8,IAA9,IAA10,IAA11,IAA12,IAA13,IAA14,IAA26,IAA15,IAA28,IAA27	8.05e-20	1.09e-17	Plant hormone signal transduction
KEGG	ath00903	2	6	3702	AT1G23800,AT3G48000	ALDH2B7,ALDH2B4	0.0006	0.0402	Limonene and pinene degradation
SMART	SM00356	6	59	3702	AT5G07500,AT2G19810,AT2G25900,AT5G44260,AT4G29190,AT1G03790	TZF6,OZF1,ATCTH,TZF5,OZF2,TZF4	6.12e-07	0.00034	Zinc finger
SMART	SM01350	3	3	3702	AT5G41670,AT3G02360,AT1G64190	PGD3,PGD2,PGD1	1.98e-06	0.00055	6-phosphogluconate dehydrogenase, C-terminal domain
SMART	SM00220	8	260	3702	AT2G26980,AT5G21326,AT5G35980,AT1G30270,AT5G57630,AT5G35410,AT1G01140,AT4G24400	CIPK3,CIPK26,YAK1,CIPK23,CIPK21,CIPK24,CIPK9,CIPK8	3.95e-05	0.0073	Serine/Threonine protein kinases, catalytic domain
SMART	SM00072	2	3	3702	AT2G41880,AT3G57550	GK-1,GK-2	0.00021	0.0297	Guanylate kinase homologues.
InterPro	IPR003311	22	29	3702	AT3G04730,AT1G51950,AT3G15540,AT5G43700,AT1G15580,AT4G14560,AT3G23030,AT1G04250,AT1G04240,AT1G52830,AT3G23050,AT2G22670,AT5G65670,AT1G04100,AT4G28640,AT1G04550,AT2G33310,AT4G14550,AT3G16500,AT1G80390,AT5G25890,AT4G29080	IAA16,IAA18,IAA19,IAA4,IAA5,IAA1,IAA2,IAA17,IAA3,IAA6,IAA7,IAA8,IAA9,IAA10,IAA11,IAA12,IAA13,IAA14,IAA26,IAA15,IAA28,IAA27	1.15e-38	7.29e-35	AUX/IAA protein
InterPro	IPR033389	22	46	3702	AT3G04730,AT1G51950,AT3G15540,AT5G43700,AT1G15580,AT4G14560,AT3G23030,AT1G04250,AT1G04240,AT1G52830,AT3G23050,AT2G22670,AT5G65670,AT1G04100,AT4G28640,AT1G04550,AT2G33310,AT4G14550,AT3G16500,AT1G80390,AT5G25890,AT4G29080	IAA16,IAA18,IAA19,IAA4,IAA5,IAA1,IAA2,IAA17,IAA3,IAA6,IAA7,IAA8,IAA9,IAA10,IAA11,IAA12,IAA13,IAA14,IAA26,IAA15,IAA28,IAA27	2.78e-35	8.79e-32	AUX/IAA domain
InterPro	IPR000270	22	88	3702	AT3G04730,AT1G51950,AT3G15540,AT5G43700,AT1G15580,AT4G14560,AT3G23030,AT1G04250,AT1G04240,AT1G52830,AT3G23050,AT2G22670,AT5G65670,AT1G04100,AT4G28640,AT1G04550,AT2G33310,AT4G14550,AT3G16500,AT1G80390,AT5G25890,AT4G29080	IAA16,IAA18,IAA19,IAA4,IAA5,IAA1,IAA2,IAA17,IAA3,IAA6,IAA7,IAA8,IAA9,IAA10,IAA11,IAA12,IAA13,IAA14,IAA26,IAA15,IAA28,IAA27	4.51e-30	9.52e-27	PB1 domain
InterPro	IPR045234	6	11	3702	AT5G07500,AT2G19810,AT2G25900,AT5G44260,AT4G29190,AT1G03790	TZF6,OZF1,ATCTH,TZF5,OZF2,TZF4	1.1e-10	1.74e-07	RING finger protein Unkempt-like
InterPro	IPR004041	7	26	3702	AT2G26980,AT5G21326,AT1G30270,AT5G57630,AT5G35410,AT1G01140,AT4G24400	CIPK3,CIPK26,CIPK23,CIPK21,CIPK24,CIPK9,CIPK8	1.6e-10	2.03e-07	NAF domain
InterPro	IPR018451	7	26	3702	AT2G26980,AT5G21326,AT1G30270,AT5G57630,AT5G35410,AT1G01140,AT4G24400	CIPK3,CIPK26,CIPK23,CIPK21,CIPK24,CIPK9,CIPK8	1.6e-10	2.03e-07	NAF/FISL domain
InterPro	IPR045069	7	50	3702	AT4G23030,AT5G19700,AT5G49130,AT1G71870,AT1G58340,AT4G29140,AT2G38510	DTX49,DTX52,DTX55,DTX54,DTX48,DTX51,DTX53	9.02e-09	8.16e-06	Multidrug and toxic compound extrusion family, eukaryotic
InterPro	IPR006918	5	12	3702	AT1G09790,AT3G29810,AT5G60920,AT5G15630,AT3G02210	COBL6,COBL2,COB,COBL4,COBL1	1.22e-08	9.68e-06	COBRA, plant
InterPro	IPR002528	7	57	3702	AT4G23030,AT5G19700,AT5G49130,AT1G71870,AT1G58340,AT4G29140,AT2G38510	DTX49,DTX52,DTX55,DTX54,DTX48,DTX51,DTX53	2.06e-08	1.45e-05	Multi antimicrobial extrusion protein
InterPro	IPR012819	4	4	3702	AT4G10120,AT1G04920,AT5G20280,AT5G11110	SPS4,SPS3-2,SPS1-2,SPS2-2	3.15e-08	1.99e-05	Sucrose-phosphate synthase, plant
InterPro	IPR035659	4	4	3702	AT4G10120,AT1G04920,AT5G20280,AT5G11110	SPS4,SPS3-2,SPS1-2,SPS2-2	3.15e-08	1.99e-05	Sucrose-phosphate synthase, C-terminal
InterPro	IPR000719	20	1039	3702	AT1G56130,AT1G56140,AT4G18640,AT5G45840,AT1G56120,AT1G56145,AT2G26980,AT5G21326,AT5G35980,AT1G30270,AT1G53090,AT5G57630,AT5G53890,AT5G35410,AT3G15354,AT3G56050,AT1G01140,AT2G40270,AT4G24400,AT2G02220	F14G9.25,F14G9.24,MDIS2,MDIS1,T6H22.9,F4I3K4_ARATH,CIPK3,CIPK26,YAK1,CIPK23,SPA4,CIPK21,PSKR2,CIPK24,SPA3,F18O21.10,CIPK9,T3G21-2,CIPK8,PSKR1	1.08e-07	5.7e-05	Protein kinase domain
InterPro	IPR011009	20	1081	3702	AT1G56130,AT1G56140,AT4G18640,AT5G45840,AT1G56120,AT1G56145,AT2G26980,AT5G21326,AT5G35980,AT1G30270,AT1G53090,AT5G57630,AT5G53890,AT5G35410,AT3G15354,AT3G56050,AT1G01140,AT2G40270,AT4G24400,AT2G02220	F14G9.25,F14G9.24,MDIS2,MDIS1,T6H22.9,F4I3K4_ARATH,CIPK3,CIPK26,YAK1,CIPK23,SPA4,CIPK21,PSKR2,CIPK24,SPA3,F18O21.10,CIPK9,T3G21-2,CIPK8,PSKR1	2.01e-07	9.81e-05	Protein kinase-like domain superfamily
InterPro	IPR006380	4	8	3702	AT4G10120,AT1G04920,AT5G20280,AT5G11110	SPS4,SPS3-2,SPS1-2,SPS2-2	2.19e-07	9.92e-05	Sucrose phosphatase-like domain
InterPro	IPR021720	4	15	3702	AT1G56130,AT1G56140,AT1G56120,AT1G56145	F14G9.25,F14G9.24,T6H22.9,F4I3K4_ARATH	1.67e-06	0.00071	Malectin domain
InterPro	IPR006113	3	3	3702	AT5G41670,AT3G02360,AT1G64190	PGD3,PGD2,PGD1	1.98e-06	0.00078	6-phosphogluconate dehydrogenase, decarboxylating
InterPro	IPR006114	3	3	3702	AT5G41670,AT3G02360,AT1G64190	PGD3,PGD2,PGD1	1.98e-06	0.00078	6-phosphogluconate dehydrogenase, C-terminal
InterPro	IPR006183	3	3	3702	AT5G41670,AT3G02360,AT1G64190	PGD3,PGD2,PGD1	1.98e-06	0.00078	6-phosphogluconate dehydrogenase
InterPro	IPR000571	6	76	3702	AT5G07500,AT2G19810,AT2G25900,AT5G44260,AT4G29190,AT1G03790	TZF6,OZF1,ATCTH,TZF5,OZF2,TZF4	2.43e-06	0.00081	Zinc finger, CCCH-type
InterPro	IPR007011	3	6	3702	AT5G27980,AT3G22500,AT3G22490	F15F15.50,ECP31,RAB28	8.22e-06	0.0026	Late embryogenesis abundant protein, SMP subgroup domain
InterPro	IPR042971	3	6	3702	AT5G27980,AT3G22500,AT3G22490	F15F15.50,ECP31,RAB28	8.22e-06	0.0026	Late embryogenesis abundant protein, SMP subgroup
InterPro	IPR001296	4	29	3702	AT4G10120,AT1G04920,AT5G20280,AT5G11110	SPS4,SPS3-2,SPS1-2,SPS2-2	1.68e-05	0.0048	Glycosyl transferase, family 1
InterPro	IPR044822	4	29	3702	AT1G76890,AT1G76880,AT1G33240,AT5G47660	GT-2,F7O12.5,GTL1,MNJ7.25	1.68e-05	0.0048	Myb/SANT-like DNA-binding domain 4
InterPro	IPR000368	3	9	3702	AT4G10120,AT1G04920,AT5G11110	SPS4,SPS3-2,SPS2-2	2.13e-05	0.0056	Sucrose synthase
InterPro	IPR008271	14	807	3702	AT1G56130,AT1G56140,AT1G56120,AT1G56145,AT2G26980,AT5G21326,AT5G35980,AT1G30270,AT5G57630,AT5G53890,AT5G35410,AT1G01140,AT4G24400,AT2G02220	F14G9.25,F14G9.24,T6H22.9,F4I3K4_ARATH,CIPK3,CIPK26,YAK1,CIPK23,CIPK21,PSKR2,CIPK24,CIPK9,CIPK8,PSKR1	3.15e-05	0.008	Serine/threonine-protein kinase, active site
InterPro	IPR006115	3	11	3702	AT5G41670,AT3G02360,AT1G64190	PGD3,PGD2,PGD1	3.5e-05	0.0085	6-phosphogluconate dehydrogenase, NADP-binding
InterPro	IPR013328	3	16	3702	AT5G41670,AT3G02360,AT1G64190	PGD3,PGD2,PGD1	9.16e-05	0.0215	6-phosphogluconate dehydrogenase, domain 2
InterPro	IPR003437	2	2	3702	AT2G26080,AT4G33010	GLDP2,GLDP1	0.00013	0.0293	Glycine dehydrogenase (decarboxylating)
InterPro	IPR010569	2	2	3702	AT3G10550,AT5G04540	MTM1,MTM2	0.00013	0.0293	Myotubularin-like, phosphatase domain
InterPro	IPR018731	2	2	3702	AT3G18770,AT3G49590	ATG13B,ATG13A	0.00013	0.0293	Autophagy-related protein 13, N-terminal
InterPro	IPR020581	2	2	3702	AT2G26080,AT4G33010	GLDP2,GLDP1	0.00013	0.0293	Glycine cleavage system P protein
InterPro	IPR030564	2	2	3702	AT3G10550,AT5G04540	MTM1,MTM2	0.00013	0.0293	Myotubularin family
InterPro	IPR040182	2	2	3702	AT3G18770,AT3G49590	ATG13B,ATG13A	0.00013	0.0293	Autophagy-related protein 13
InterPro	IPR008145	2	3	3702	AT2G41880,AT3G57550	GK-1,GK-2	0.00021	0.04	Guanylate kinase/L-type calcium channel beta subunit
InterPro	IPR017665	2	3	3702	AT2G41880,AT3G57550	GK-1,GK-2	0.00021	0.04	Guanylate kinase
Pfam	PF02309	22	46	3702	AT3G04730,AT1G51950,AT3G15540,AT5G43700,AT1G15580,AT4G14560,AT3G23030,AT1G04250,AT1G04240,AT1G52830,AT3G23050,AT2G22670,AT5G65670,AT1G04100,AT4G28640,AT1G04550,AT2G33310,AT4G14550,AT3G16500,AT1G80390,AT5G25890,AT4G29080	IAA16,IAA18,IAA19,IAA4,IAA5,IAA1,IAA2,IAA17,IAA3,IAA6,IAA7,IAA8,IAA9,IAA10,IAA11,IAA12,IAA13,IAA14,IAA26,IAA15,IAA28,IAA27	2.78e-35	5.75e-32	AUX/IAA family
Pfam	PF03822	7	26	3702	AT2G26980,AT5G21326,AT1G30270,AT5G57630,AT5G35410,AT1G01140,AT4G24400	CIPK3,CIPK26,CIPK23,CIPK21,CIPK24,CIPK9,CIPK8	1.6e-10	1.65e-07	NAF domain
Pfam	PF01554	7	51	3702	AT4G23030,AT5G19700,AT5G49130,AT1G71870,AT1G58340,AT4G29140,AT2G38510	DTX49,DTX52,DTX55,DTX54,DTX48,DTX51,DTX53	1.02e-08	7.05e-06	MatE
Pfam	PF04833	5	12	3702	AT1G09790,AT3G29810,AT5G60920,AT5G15630,AT3G02210	COBL6,COBL2,COB,COBL4,COBL1	1.22e-08	7.05e-06	COBRA-like protein
Pfam	PF05116	4	5	3702	AT4G10120,AT1G04920,AT5G20280,AT5G11110	SPS4,SPS3-2,SPS1-2,SPS2-2	5.64e-08	2.33e-05	Sucrose-6F-phosphate phosphohydrolase
Pfam	PF00862	4	10	3702	AT4G10120,AT1G04920,AT5G20280,AT5G11110	SPS4,SPS3-2,SPS1-2,SPS2-2	4.4e-07	0.00015	Sucrose synthase
Pfam	PF04927	3	6	3702	AT5G27980,AT3G22500,AT3G22490	F15F15.50,ECP31,RAB28	8.22e-06	0.0024	Seed maturation protein
Pfam	PF11721	4	26	3702	AT1G56130,AT1G56140,AT1G56120,AT1G56145	F14G9.25,F14G9.24,T6H22.9,F4I3K4_ARATH	1.14e-05	0.0029	Malectin domain
Pfam	PF13692	4	26	3702	AT4G10120,AT1G04920,AT5G20280,AT5G11110	SPS4,SPS3-2,SPS1-2,SPS2-2	1.14e-05	0.0029	Glycosyl transferases group 1
Pfam	PF03446	3	12	3702	AT5G41670,AT3G02360,AT1G64190	PGD3,PGD2,PGD1	4.36e-05	0.009	NAD binding domain of 6-phosphogluconate dehydrogenase
Pfam	PF02347	2	2	3702	AT2G26080,AT4G33010	GLDP2,GLDP1	0.00013	0.0243	Glycine cleavage system P-protein
Pfam	PF06602	2	2	3702	AT3G10550,AT5G04540	MTM1,MTM2	0.00013	0.0243	Myotubularin-like phosphatase domain
Pfam	PF10033	2	2	3702	AT3G18770,AT3G49590	ATG13B,ATG13A	0.00013	0.0243	Autophagy-related protein 13
PMID	PMID:33953533	20	29	3702	AT3G04730,AT1G51950,AT3G15540,AT5G43700,AT1G15580,AT4G14560,AT3G23030,AT1G04250,AT1G04240,AT3G23050,AT2G22670,AT5G65670,AT1G04100,AT4G28640,AT1G04550,AT2G33310,AT4G14550,AT3G16500,AT1G80390,AT5G25890	IAA16,IAA18,IAA19,IAA4,IAA5,IAA1,IAA2,IAA17,IAA3,IAA7,IAA8,IAA9,IAA10,IAA11,IAA12,IAA13,IAA14,IAA26,IAA15,IAA28	1.35e-34	1.32e-29	(2021) Identification and Analysis of AuxIAA Family in Acer rubrum.
PMID	PMID:26932351	22	52	3702	AT3G04730,AT1G51950,AT3G15540,AT5G43700,AT1G15580,AT4G14560,AT3G23030,AT1G04250,AT1G04240,AT1G52830,AT3G23050,AT2G22670,AT5G65670,AT1G04100,AT4G28640,AT1G04550,AT2G33310,AT4G14550,AT3G16500,AT1G80390,AT5G25890,AT4G29080	IAA16,IAA18,IAA19,IAA4,IAA5,IAA1,IAA2,IAA17,IAA3,IAA6,IAA7,IAA8,IAA9,IAA10,IAA11,IAA12,IAA13,IAA14,IAA26,IAA15,IAA28,IAA27	2.47e-34	1.32e-29	(2016) Modelling the influence of dimerisation sequence dissimilarities on the auxin signalling network.
PMID	PMID:36623191	20	51	3702	AT3G04730,AT1G51950,AT3G15540,AT5G43700,AT1G15580,AT4G14560,AT3G23030,AT1G04250,AT1G04240,AT1G52830,AT2G22670,AT5G65670,AT1G04100,AT4G28640,AT1G04550,AT2G33310,AT4G14550,AT3G16500,AT5G25890,AT4G29080	IAA16,IAA18,IAA19,IAA4,IAA5,IAA1,IAA2,IAA17,IAA3,IAA6,IAA8,IAA9,IAA10,IAA11,IAA12,IAA13,IAA14,IAA26,IAA28,IAA27	9.87e-31	3.23e-26	(2023) CPR5-mediated nucleo-cytoplasmic localization of IAA12 and IAA19 controls lateral root development during abiotic stress.
PMID	PMID:34746298	17	22	3702	AT3G04730,AT1G51950,AT3G15540,AT5G43700,AT3G23030,AT1G04250,AT1G04240,AT1G52830,AT3G23050,AT2G22670,AT5G65670,AT1G04100,AT4G28640,AT1G04550,AT2G33310,AT4G14550,AT1G80390	IAA16,IAA18,IAA19,IAA4,IAA2,IAA17,IAA3,IAA6,IAA7,IAA8,IAA9,IAA10,IAA11,IAA12,IAA13,IAA14,IAA15	3.81e-30	9.38e-26	(2021) Genome-Wide Analysis of the AuxinIndoleacetic Acid Gene Family and Response to Indole-3-Acetic Acid Stress in Tartary Buckwheat (Fagopyrum tataricum).
PMID	PMID:23658556	18	39	3702	AT3G04730,AT3G15540,AT1G15580,AT4G14560,AT3G23030,AT1G04250,AT1G04240,AT1G52830,AT3G23050,AT2G22670,AT5G65670,AT1G04100,AT4G28640,AT1G04550,AT2G33310,AT4G14550,AT5G25890,AT4G29080	IAA16,IAA19,IAA5,IAA1,IAA2,IAA17,IAA3,IAA6,IAA7,IAA8,IAA9,IAA10,IAA11,IAA12,IAA13,IAA14,IAA28,IAA27	8.83e-29	1.74e-24	(2013) Finding Missing Interactions of the Arabidopsis thaliana Root Stem Cell Niche Gene Regulatory Network.
PMID	PMID:32153614	18	45	3702	AT3G04730,AT1G51950,AT3G15540,AT1G15580,AT4G14560,AT3G23030,AT1G04250,AT1G04240,AT1G52830,AT3G23050,AT2G22670,AT4G28640,AT1G04550,AT2G33310,AT4G14550,AT3G16500,AT1G80390,AT5G25890	IAA16,IAA18,IAA19,IAA5,IAA1,IAA2,IAA17,IAA3,IAA6,IAA7,IAA8,IAA11,IAA12,IAA13,IAA14,IAA26,IAA15,IAA28	7.2e-28	1.12e-23	(2020) The Auxin Signaling Repressor IAA8 Promotes Seed Germination Through Down-Regulation of ABI3 Transcription in Arabidopsis.
PMID	PMID:28991190	16	23	3702	AT3G04730,AT1G51950,AT3G15540,AT1G15580,AT4G14560,AT3G23030,AT1G04250,AT1G04240,AT1G52830,AT3G23050,AT5G65670,AT4G14550,AT3G16500,AT1G80390,AT5G25890,AT4G29080	IAA16,IAA18,IAA19,IAA5,IAA1,IAA2,IAA17,IAA3,IAA6,IAA7,IAA9,IAA14,IAA26,IAA15,IAA28,IAA27	6.85e-28	1.12e-23	(2017) Evolution Analysis of the AuxIAA Gene Family in Plants Shows Dual Origins and Variable Nuclear Localization Signals.
PMID	PMID:29337875	18	51	3702	AT3G04730,AT1G51950,AT3G15540,AT5G43700,AT1G15580,AT4G14560,AT3G23030,AT1G04250,AT1G04240,AT1G52830,AT3G23050,AT5G65670,AT1G04100,AT4G28640,AT1G04550,AT4G14550,AT1G80390,AT5G25890	IAA16,IAA18,IAA19,IAA4,IAA5,IAA1,IAA2,IAA17,IAA3,IAA6,IAA7,IAA9,IAA10,IAA11,IAA12,IAA14,IAA15,IAA28	4.69e-27	5.76e-23	(2018) AuxIAA Gene Family in Plants: Molecular Structure, Regulation, and Function.
PMID	PMID:24399174	15	28	3702	AT3G04730,AT3G15540,AT5G43700,AT4G14560,AT1G04250,AT1G04240,AT3G23050,AT2G22670,AT5G65670,AT4G28640,AT1G04550,AT4G14550,AT3G16500,AT1G80390,AT4G29080	IAA16,IAA19,IAA4,IAA1,IAA17,IAA3,IAA7,IAA8,IAA9,IAA11,IAA12,IAA14,IAA26,IAA15,IAA27	6.53e-25	7.13e-21	(2014) Genome-wide identification, phylogenetic analysis, expression profiling, and protein-protein interaction properties of TOPLESS gene family members in tomato.
PMID	PMID:25566309	15	32	3702	AT3G15540,AT1G15580,AT4G14560,AT1G04250,AT1G04240,AT1G52830,AT3G23050,AT5G65670,AT4G28640,AT1G04550,AT4G14550,AT3G16500,AT1G80390,AT5G25890,AT4G29080	IAA19,IAA5,IAA1,IAA17,IAA3,IAA6,IAA7,IAA9,IAA11,IAA12,IAA14,IAA26,IAA15,IAA28,IAA27	3.19e-24	3.13e-20	(2014) Protein-protein interaction and gene co-expression maps of ARFs and AuxIAAs in Arabidopsis.
PMID	PMID:32903377	14	27	3702	AT3G04730,AT1G51950,AT3G15540,AT1G15580,AT4G14560,AT1G04250,AT1G04240,AT1G52830,AT3G23050,AT2G22670,AT1G04550,AT4G14550,AT1G80390,AT5G25890	IAA16,IAA18,IAA19,IAA5,IAA1,IAA17,IAA3,IAA6,IAA7,IAA8,IAA12,IAA14,IAA15,IAA28	3.65e-23	3.26e-19	(2020) A Gain-of-Function Mutant of IAA15 Inhibits Lateral Root Development by Transcriptional Repression of LBD Genes in Arabidopsis.
PMID	PMID:36161329	15	47	3702	AT1G51950,AT3G15540,AT5G43700,AT1G15580,AT4G14560,AT1G04250,AT1G04240,AT1G52830,AT3G23050,AT5G65670,AT4G28640,AT1G04550,AT4G14550,AT1G80390,AT5G25890	IAA18,IAA19,IAA4,IAA5,IAA1,IAA17,IAA3,IAA6,IAA7,IAA9,IAA11,IAA12,IAA14,IAA15,IAA28	3.72e-22	3.05e-18	(2022) Phosphorylation of the auxin signaling transcriptional repressor IAA15 by MPKs is required for the suppression of root development under drought stress in Arabidopsis.
PMID	PMID:32385295	13	34	3702	AT3G15540,AT5G43700,AT1G15580,AT4G14560,AT3G23030,AT1G52830,AT3G23050,AT1G04550,AT2G33310,AT4G14550,AT3G16500,AT1G80390,AT5G25890	IAA19,IAA4,IAA5,IAA1,IAA2,IAA6,IAA7,IAA12,IAA13,IAA14,IAA26,IAA15,IAA28	3.37e-20	2.55e-16	(2020) Flexibility of intrinsically disordered degrons in AUXIAA proteins reinforces auxin co-receptor assemblies.
PMID	PMID:23986770	11	15	3702	AT3G04730,AT1G51950,AT3G15540,AT1G04250,AT1G04240,AT3G23050,AT2G22670,AT5G65670,AT1G04100,AT4G14550,AT5G25890	IAA16,IAA18,IAA19,IAA17,IAA3,IAA7,IAA8,IAA9,IAA10,IAA14,IAA28	1.1e-19	7.72e-16	(2013) Phloem-specific expression of a melon AuxIAA in tomato plants alters auxin sensitivity and plant development.
PMID	PMID:26579165	11	16	3702	AT3G04730,AT1G51950,AT3G15540,AT4G14560,AT1G04250,AT1G04240,AT3G23050,AT5G65670,AT1G04550,AT4G14550,AT5G25890	IAA16,IAA18,IAA19,IAA1,IAA17,IAA3,IAA7,IAA9,IAA12,IAA14,IAA28	1.85e-19	1.21e-15	(2015) Genome-wide survey and comprehensive expression profiling of AuxIAA gene family in chickpea and soybean.
PMID	PMID:25203637	11	16	3702	AT3G04730,AT3G15540,AT5G43700,AT4G14560,AT3G23030,AT1G04250,AT3G23050,AT1G04550,AT4G14550,AT3G16500,AT5G25890	IAA16,IAA19,IAA4,IAA1,IAA2,IAA17,IAA7,IAA12,IAA14,IAA26,IAA28	1.85e-19	1.21e-15	(2014) Diversity of stability, localization, interaction and control of downstream gene activity in the Maize AuxIAA protein family.
PMID	PMID:19654206	16	99	3702	AT1G51950,AT3G15540,AT5G43700,AT1G15580,AT4G14560,AT3G23030,AT1G04250,AT1G04240,AT1G52830,AT3G23050,AT2G22670,AT5G65670,AT4G28640,AT1G04550,AT4G14550,AT5G25890	IAA18,IAA19,IAA4,IAA5,IAA1,IAA2,IAA17,IAA3,IAA6,IAA7,IAA8,IAA9,IAA11,IAA12,IAA14,IAA28	2.03e-19	1.21e-15	(2009) Genome-wide analysis of the auxin-responsive transcriptome downstream of iaa1 and its expression analysis reveal the diversity and complexity of auxin-regulated gene expression.
PMID	PMID:38005755	11	20	3702	AT3G04730,AT3G15540,AT5G43700,AT3G23030,AT3G23050,AT5G65670,AT4G28640,AT4G14550,AT3G16500,AT1G80390,AT5G25890	IAA16,IAA19,IAA4,IAA2,IAA7,IAA9,IAA11,IAA14,IAA26,IAA15,IAA28	1.18e-18	6.45e-15	(2023) Analysis of Auxin-Encoding Gene Family in Vigna radiata and Its Cross-Species Expression Modulating Waterlogging Tolerance in Wild Vigna umbellata.
PMID	PMID:22580954	11	21	3702	AT3G04730,AT1G51950,AT3G15540,AT4G14560,AT1G04250,AT1G04240,AT1G52830,AT3G23050,AT1G04550,AT4G14550,AT5G25890	IAA16,IAA18,IAA19,IAA1,IAA17,IAA3,IAA6,IAA7,IAA12,IAA14,IAA28	1.79e-18	9.27e-15	(2012) A gain-of-function mutation in IAA16 confers reduced responses to auxin and abscisic acid and impedes plant growth and fertility.
PMID	PMID:36362171	12	36	3702	AT3G15540,AT1G15580,AT4G14560,AT1G04250,AT1G04240,AT1G52830,AT3G23050,AT1G04100,AT4G28640,AT1G04550,AT2G33310,AT4G14550	IAA19,IAA5,IAA1,IAA17,IAA3,IAA6,IAA7,IAA10,IAA11,IAA12,IAA13,IAA14	3.9e-18	1.92e-14	(2022) AuxIAA11 Is Required for UV-AB Tolerance and Auxin Sensing in Arabidopsis thaliana
PMID	PMID:23812082	10	14	3702	AT1G51950,AT3G15540,AT4G14560,AT1G04250,AT1G04240,AT1G52830,AT3G23050,AT1G04550,AT4G14550,AT5G25890	IAA18,IAA19,IAA1,IAA17,IAA3,IAA6,IAA7,IAA12,IAA14,IAA28	6.49e-18	3.04e-14	(2013) Ectopic overexpression of an AUXININDOLE-3-ACETIC ACID (AuxIAA) gene OsIAA4 in rice induces morphological changes and reduces responsiveness to Auxin.
PMID	PMID:22096563	10	22	3702	AT3G15540,AT4G14560,AT1G04250,AT1G04240,AT1G52830,AT3G23050,AT5G65670,AT1G04550,AT4G14550,AT5G25890	IAA19,IAA1,IAA17,IAA3,IAA6,IAA7,IAA9,IAA12,IAA14,IAA28	2.07e-16	9.24e-13	(2011) Large-scale protein-protein interaction analysis in Arabidopsis mesophyll protoplasts by split firefly luciferase complementation.
PMID	PMID:19213814	10	22	3702	AT3G15540,AT5G43700,AT1G15580,AT4G14560,AT3G23030,AT1G04250,AT1G04240,AT1G52830,AT2G22670,AT5G65670	IAA19,IAA4,IAA5,IAA1,IAA2,IAA17,IAA3,IAA6,IAA8,IAA9	2.07e-16	9.24e-13	(2009) Sl-IAA3, a tomato AuxIAA at the crossroads of auxin and ethylene signalling involved in differential growth.
PMID	PMID:35003191	11	36	3702	AT3G15540,AT5G43700,AT1G15580,AT4G14560,AT1G04250,AT1G04240,AT1G52830,AT5G65670,AT4G28640,AT4G14550,AT1G80390	IAA19,IAA4,IAA5,IAA1,IAA17,IAA3,IAA6,IAA9,IAA11,IAA14,IAA15	2.28e-16	9.34e-13	(2021) Magnesium Limitation Leads to Transcriptional Down-Tuning of Auxin Synthesis, Transport, and Signaling in the Tomato Root.
PMID	PMID:26020649	10	23	3702	AT1G51950,AT3G15540,AT1G04250,AT5G65670,AT1G04100,AT1G04550,AT4G14550,AT3G16500,AT5G25890,AT4G29080	IAA18,IAA19,IAA17,IAA9,IAA10,IAA12,IAA14,IAA26,IAA28,IAA27	2.96e-16	1.16e-12	(2015) A Simple Auxin Transcriptional Response System Regulates Multiple Morphogenetic Processes in the Liverwort Marchantia polymorpha.
PMID	PMID:21734647	11	40	3702	AT3G04730,AT1G51950,AT3G23030,AT1G04250,AT1G04240,AT3G23050,AT2G22670,AT5G65670,AT4G28640,AT1G04550,AT5G25890	IAA16,IAA18,IAA2,IAA17,IAA3,IAA7,IAA8,IAA9,IAA11,IAA12,IAA28	6.14e-16	2.32e-12	(2011) The auxin signalling network translates dynamic input into robust patterning at the shoot apex.
PMID	PMID:35817652	10	28	3702	AT3G04730,AT1G51950,AT3G15540,AT4G14560,AT3G23030,AT1G04250,AT1G04240,AT1G52830,AT3G23050,AT5G65670	IAA16,IAA18,IAA19,IAA1,IAA2,IAA17,IAA3,IAA6,IAA7,IAA9	1.48e-15	5.39e-12	(2022) Intrinsic and extrinsic regulators of AuxIAA protein degradation dynamics.
PMID	PMID:30850516	11	44	3702	AT3G04730,AT3G15540,AT1G15580,AT4G14560,AT3G23030,AT1G04250,AT1G04240,AT3G23050,AT1G04100,AT1G04550,AT4G14550	IAA16,IAA19,IAA5,IAA1,IAA2,IAA17,IAA3,IAA7,IAA10,IAA12,IAA14	1.52e-15	5.39e-12	(2019) Selective auxin agonists induce specific AUXIAA protein degradation to modulate plant development.
PMID	PMID:38203344	11	46	3702	AT3G04730,AT3G15540,AT3G23030,AT1G04250,AT1G04240,AT3G23050,AT2G22670,AT5G65670,AT1G04550,AT2G33310,AT5G25890	IAA16,IAA19,IAA2,IAA17,IAA3,IAA7,IAA8,IAA9,IAA12,IAA13,IAA28	2.32e-15	7.88e-12	(2023) Analysis of the Candidate Genes and Underlying Molecular Mechanism of P198, an RNAi-Related Dwarf and Sterile Line.
PMID	PMID:36012719	9	17	3702	AT1G51950,AT4G14560,AT3G23030,AT1G04250,AT1G04240,AT5G65670,AT3G16500,AT1G80390,AT4G29080	IAA18,IAA1,IAA2,IAA17,IAA3,IAA9,IAA26,IAA15,IAA27	2.35e-15	7.88e-12	(2022) The MdAuxIAA2 Transcription Repressor Regulates Cell and Fruit Size in Apple Fruit.
PMID	PMID:22466420	9	20	3702	AT1G15580,AT4G14560,AT1G04250,AT1G04240,AT3G23050,AT2G22670,AT1G04550,AT4G14550,AT5G25890	IAA5,IAA1,IAA17,IAA3,IAA7,IAA8,IAA12,IAA14,IAA28	7.44e-15	2.36e-11	(2012) A combinatorial TIR1AFB-AuxIAA co-receptor system for differential sensing of auxin.
PMID	PMID:31266179	8	12	3702	AT3G15540,AT3G23030,AT1G04250,AT1G04240,AT3G23050,AT2G22670,AT4G28640,AT1G80390	IAA19,IAA2,IAA17,IAA3,IAA7,IAA8,IAA11,IAA15	2.2e-14	6.77e-11	(2019) Genome-Wide Analysis and Characterization of the AuxIAA Family Genes Related to Floral Scent Formation in Hedychium coronarium.
PMID	PMID:25226164	8	13	3702	AT3G04730,AT3G15540,AT4G14560,AT1G04250,AT1G04240,AT3G23050,AT4G14550,AT5G25890	IAA16,IAA19,IAA1,IAA17,IAA3,IAA7,IAA14,IAA28	3.54e-14	1.06e-10	(2014) Genome-wide identification and expression profiling analysis of the AuxIAA gene family in Medicago truncatula during the early phase of Sinorhizobium meliloti infection.
PMID	PMID:34065759	9	33	3702	AT3G04730,AT1G51950,AT5G43700,AT1G04240,AT3G23050,AT2G22670,AT5G65670,AT2G33310,AT4G29080	IAA16,IAA18,IAA4,IAA3,IAA7,IAA8,IAA9,IAA13,IAA27	3.15e-13	9.1e-10	(2021) Integrated Signals of Jasmonates, Sugars, Cytokinins and Auxin Influence the Initial Growth of the Second Buds of Chrysanthemum after Decapitation.
PMID	PMID:20504967	9	33	3702	AT3G15540,AT1G15580,AT4G14560,AT1G04250,AT1G04240,AT3G23050,AT1G04550,AT4G14550,AT5G25890	IAA19,IAA5,IAA1,IAA17,IAA3,IAA7,IAA12,IAA14,IAA28	3.15e-13	9.1e-10	(2010) Auxin perception--structural insights.
PMID	PMID:39012193	7	9	3702	AT3G04730,AT3G15540,AT5G43700,AT4G14560,AT3G23030,AT1G04240,AT3G23050	IAA16,IAA19,IAA4,IAA1,IAA2,IAA3,IAA7	4.58e-13	1.25e-09	(2024) Sextuple knockouts of a highly conserved and coexpressed AUXININDOLE-3-ACETIC ACID gene set confer shade avoidance-like responses in Arabidopsis.
PMID	PMID:28223997	7	9	3702	AT1G51950,AT3G15540,AT4G14560,AT1G04250,AT1G04240,AT4G14550,AT5G25890	IAA18,IAA19,IAA1,IAA17,IAA3,IAA14,IAA28	4.58e-13	1.25e-09	(2017) Melatonin Regulates Root Architecture by Modulating Auxin Response in Rice.
PMID	PMID:31372596	9	35	3702	AT1G51950,AT3G15540,AT4G14560,AT1G52830,AT2G22670,AT5G65670,AT1G04100,AT4G28640,AT3G16500	IAA18,IAA19,IAA1,IAA6,IAA8,IAA9,IAA10,IAA11,IAA26	4.97e-13	1.28e-09	(2019) Accelerating structure-function mapping using the ViVa webtool to mine natural variation.
PMID	PMID:32391030	8	23	3702	AT4G10120,AT5G65670,AT1G04550,AT2G33310,AT4G14550,AT1G04920,AT5G20280,AT5G11110	SPS4,IAA9,IAA12,IAA13,IAA14,SPS3-2,SPS1-2,SPS2-2	1.32e-12	3.33e-09	(2020) Peach PpSnRK1 Participates in Sucrose-Mediated Root Growth Through Auxin Signaling.
PMID	PMID:31011789	8	23	3702	AT3G15540,AT3G23030,AT1G04250,AT1G04240,AT3G23050,AT1G04550,AT4G14550,AT5G25890	IAA19,IAA2,IAA17,IAA3,IAA7,IAA12,IAA14,IAA28	1.32e-12	3.33e-09	(2019) Three BnaIAA7 homologs are involved in auxinbrassinosteroid-mediated plant morphogenesis in rapeseed (Brassica napus L.).
PMID	PMID:35217601	8	24	3702	AT3G04730,AT3G15540,AT4G14560,AT3G23030,AT1G04240,AT3G23050,AT3G16500,AT5G25890	IAA16,IAA19,IAA1,IAA2,IAA3,IAA7,IAA26,IAA28	1.75e-12	4.21e-09	(2022) An in-frame deletion mutation in the degron tail of auxin coreceptor IAA2 confers resistance to the herbicide 2,4-D in Sisymbrium orientale.
PMID	PMID:35406955	8	25	3702	AT4G10120,AT2G26980,AT1G04920,AT1G30270,AT5G20280,AT5G11110,AT5G35410,AT1G01140	SPS4,CIPK3,SPS3-2,CIPK23,SPS1-2,SPS2-2,CIPK24,CIPK9	2.31e-12	5.4e-09	(2022) Genome-Wide Identification, Expression Pattern and Sequence Variation Analysis of SnRK Family Genes in Barley.
PMID	PMID:29312432	8	25	3702	AT3G04730,AT3G23030,AT1G04250,AT3G23050,AT5G65670,AT1G04550,AT1G80390,AT5G25890	IAA16,IAA2,IAA17,IAA7,IAA9,IAA12,IAA15,IAA28	2.31e-12	5.4e-09	(2017) Coupling Seq-BSA and RNA-Seq Analyses Reveal the Molecular Pathway and Genes Associated with Heading Type in Chinese Cabbage.
PMID	PMID:33369837	7	13	3702	AT3G15540,AT4G14560,AT1G04250,AT1G04240,AT3G23050,AT4G14550,AT5G25890	IAA19,IAA1,IAA17,IAA3,IAA7,IAA14,IAA28	3.05e-12	6.71e-09	(2021) A novel motif in the 5-UTR of an orphan gene Big Root Biomass modulates root biomass in sesame.
PMID	PMID:24591051	8	26	3702	AT3G15540,AT1G15580,AT1G04250,AT1G04240,AT3G23050,AT4G28640,AT1G04550,AT2G33310	IAA19,IAA5,IAA17,IAA3,IAA7,IAA11,IAA12,IAA13	3e-12	6.71e-09	(2014) Cyclic GMP is involved in auxin signalling during Arabidopsis root growth and development.
PMID	PMID:26734051	7	14	3702	AT3G04730,AT1G51950,AT1G04250,AT1G04240,AT3G23050,AT4G14550,AT5G25890	IAA16,IAA18,IAA17,IAA3,IAA7,IAA14,IAA28	4.56e-12	9.75e-09	(2015) Constitutive Expression of OsIAA9 Affects Starch Granules Accumulation and Root Gravitropic Response in Arabidopsis.
PMID	PMID:22527388	7	14	3702	AT1G51950,AT3G15540,AT4G14560,AT1G04240,AT1G04550,AT4G14550,AT5G25890	IAA18,IAA19,IAA1,IAA3,IAA12,IAA14,IAA28	4.56e-12	9.75e-09	(2012) Multiple AUXIAA-ARF modules regulate lateral root formation: the role of Arabidopsis SHY2IAA3-mediated auxin signalling.
PMID	PMID:17217541	8	29	3702	AT1G51950,AT4G14560,AT3G23030,AT1G04250,AT1G04240,AT2G22670,AT1G04550,AT2G33310	IAA18,IAA1,IAA2,IAA17,IAA3,IAA8,IAA12,IAA13	6.31e-12	1.29e-08	(2007) Qualitative network models and genome-wide expression data define carbonnitrogen-responsive molecular machines in Arabidopsis.
PMID	PMID:38003372	7	15	3702	AT3G04730,AT3G15540,AT5G43700,AT1G15580,AT1G04250,AT1G52830,AT1G04550	IAA16,IAA19,IAA4,IAA5,IAA17,IAA6,IAA12	6.66e-12	1.34e-08	(2023) Genome-Wide Characterization of the AuxIAA Gene Family in Orchardgrass and a Functional Analysis of DgIAA21 in Responding to Drought Stress.
PMID	PMID:25086590	7	15	3702	AT5G43700,AT1G15580,AT4G14560,AT3G23030,AT1G04240,AT1G52830,AT3G23050	IAA4,IAA5,IAA1,IAA2,IAA3,IAA6,IAA7	6.66e-12	1.34e-08	(2014) Phosphate depletion modulates auxin transport in Triticum aestivum leading to altered root branching.
PMID	PMID:22346763	10	75	3702	AT3G04730,AT3G15540,AT5G43700,AT4G14560,AT3G23030,AT1G04250,AT1G04240,AT1G52830,AT3G23050,AT2G33310	IAA16,IAA19,IAA4,IAA1,IAA2,IAA17,IAA3,IAA6,IAA7,IAA13	8.15e-12	1.57e-08	(2012) A regulatory network for coordinated flower maturation.
PMID	PMID:35684245	7	16	3702	AT3G04730,AT3G15540,AT4G14560,AT3G23030,AT1G04240,AT4G28640,AT5G25890	IAA16,IAA19,IAA1,IAA2,IAA3,IAA11,IAA28	9.54e-12	1.8e-08	(2022) The Auxin-Response Repressor IAA30 Is Down-Regulated in Reproductive Tissues of Apomictic Paspalum notatum.
PMID	PMID:37961442	8	32	3702	AT3G04730,AT3G15540,AT1G04250,AT1G04240,AT3G23050,AT2G22670,AT3G16500,AT5G25890	IAA16,IAA19,IAA17,IAA3,IAA7,IAA8,IAA26,IAA28	1.24e-11	2.31e-08	(2023) Identification of potential Auxin Response Candidate genes for soybean rapid canopy coverage through comparative evolution and expression analysis.
PMID	PMID:20693412	7	17	3702	AT1G51950,AT3G15540,AT4G14560,AT1G04250,AT1G52830,AT1G04550,AT4G14550	IAA18,IAA19,IAA1,IAA17,IAA6,IAA12,IAA14	1.34e-11	2.44e-08	(2010) Functional analysis of the structural domain of ARF proteins in rice (Oryza sativa L.).
PMID	PMID:37416889	7	18	3702	AT4G10120,AT1G04250,AT1G04240,AT3G23050,AT1G04920,AT5G20280,AT5G11110	SPS4,IAA17,IAA3,IAA7,SPS3-2,SPS1-2,SPS2-2	1.86e-11	3.32e-08	(2023) Overexpression of peanut (Arachis hypogaea L.) AhGRFi gene enhanced root growth inhibition under exogenous NAA treatment in Arabidopsis thaliana.
PMID	PMID:26721260	7	18	3702	AT4G14560,AT3G23050,AT2G22670,AT5G65670,AT4G14550,AT1G80390,AT5G25890	IAA1,IAA7,IAA8,IAA9,IAA14,IAA15,IAA28	1.86e-11	3.32e-08	(2015) Retention, Molecular Evolution, and Expression Divergence of the AuxinIndole Acetic Acid and Auxin Response Factor Gene Families in Brassica Rapa Shed Light on Their Evolution Patterns in Plants.
PMID	PMID:24313839	7	18	3702	AT5G43700,AT1G04250,AT1G04240,AT3G23050,AT5G65670,AT4G14550,AT5G25890	IAA4,IAA17,IAA3,IAA7,IAA9,IAA14,IAA28	1.86e-11	3.32e-08	(2014) Defining binding efficiency and specificity of auxins for SCF(TIR1AFB)-AuxIAA co-receptor complex formation.
PMID	PMID:29237069	8	35	3702	AT3G15540,AT1G15580,AT1G04250,AT1G52830,AT3G23050,AT5G65670,AT1G04550,AT5G25890	IAA19,IAA5,IAA17,IAA6,IAA7,IAA9,IAA12,IAA28	2.32e-11	3.93e-08	(2018) Auxin signaling: a big question to be addressed by small molecules.
PMID	PMID:18416834	7	19	3702	AT4G10120,AT1G04920,AT5G20280,AT5G41670,AT3G02360,AT5G11110,AT1G64190	SPS4,SPS3-2,SPS1-2,PGD3,PGD2,SPS2-2,PGD1	2.53e-11	4.22e-08	(2008) Heterologous microarray experiments allow the identification of the early events associated with potato tuber cold sweetening.
PMID	PMID:17121469	7	19	3702	AT3G15540,AT4G14560,AT3G23030,AT1G52830,AT3G23050,AT1G04550,AT4G14550	IAA19,IAA1,IAA2,IAA6,IAA7,IAA12,IAA14	2.53e-11	4.22e-08	(2006) Opposite root growth phenotypes of hy5 versus hy5 hyh mutants correlate with increased constitutive auxin signaling.
PMID	PMID:34191837	6	8	3702	AT3G04730,AT4G14560,AT1G04240,AT3G23050,AT5G65670,AT5G25890	IAA16,IAA1,IAA3,IAA7,IAA9,IAA28	2.71e-11	4.36e-08	(2021) Characterization of clopyralid resistance in lawn burweed (Soliva sessilis).
PMID	PMID:34618142	9	58	3702	AT3G15540,AT1G15580,AT4G14560,AT1G04250,AT1G04240,AT1G52830,AT3G23050,AT5G65670,AT4G14550	IAA19,IAA5,IAA1,IAA17,IAA3,IAA6,IAA7,IAA9,IAA14	2.74e-11	4.36e-08	(2021) A network of stress-related genes regulates hypocotyl elongation downstream of selective auxin perception.
PMID	PMID:29271945	8	36	3702	AT3G15540,AT5G43700,AT4G14560,AT3G23030,AT1G04250,AT1G04240,AT3G23050,AT4G14550	IAA19,IAA4,IAA1,IAA2,IAA17,IAA3,IAA7,IAA14	2.82e-11	4.36e-08	(2017) Comparative Transcriptome Analysis Reveals Hormone Signaling Genes Involved in the Launch of Culm-Shape Differentiation in Dendrocalamus sinicus.
PMID	PMID:16284307	6	8	3702	AT3G15540,AT1G15580,AT1G04250,AT1G52830,AT2G22670,AT5G65670	IAA19,IAA5,IAA17,IAA6,IAA8,IAA9	2.71e-11	4.36e-08	(2005) Functional genomic analysis of the AUXININDOLE-3-ACETIC ACID gene family members in Arabidopsis thaliana.
PMID	PMID:11115889	6	8	3702	AT5G43700,AT4G14560,AT1G04250,AT1G04240,AT3G23050,AT5G65670	IAA4,IAA1,IAA17,IAA3,IAA7,IAA9	2.71e-11	4.36e-08	(2000) AuxIAA proteins are phosphorylated by phytochrome in vitro.
PMID	PMID:7658471	6	8	3702	AT5G43700,AT4G14560,AT1G52830,AT3G23050,AT2G22670,AT4G14550	IAA4,IAA1,IAA6,IAA7,IAA8,IAA14	2.71e-11	4.36e-08	(1995) The PS-IAA45-like family of early auxin-inducible mRNAs in Arabidopsis thaliana.
PMID	PMID:23077539	7	22	3702	AT3G04730,AT1G51950,AT4G14560,AT3G23030,AT1G04240,AT3G23050,AT4G28640	IAA16,IAA18,IAA1,IAA2,IAA3,IAA7,IAA11	5.94e-11	8.71e-08	(2012) Interactome-wide prediction of protein-protein binding sites reveals effects of protein sequence variation in Arabidopsis thaliana.
PMID	PMID:37237499	7	23	3702	AT4G10120,AT1G04920,AT5G20280,AT5G41670,AT3G02360,AT5G11110,AT1G64190	SPS4,SPS3-2,SPS1-2,PGD3,PGD2,SPS2-2,PGD1	7.71e-11	1.12e-07	(2023) Arabidopsis thaliana Sucrose Phosphate Synthase A2 Affects Carbon Partitioning and Drought Response.
PMID	PMID:26071533	6	11	3702	AT1G51950,AT5G43700,AT3G23030,AT1G04250,AT1G04240,AT1G04550	IAA18,IAA4,IAA2,IAA17,IAA3,IAA12	1.1e-10	1.57e-07	(2015) Expression of Brassica napus TTG2, a regulator of trichome development, increases plant sensitivity to salt stress by suppressing the expression of auxin biosynthesis genes.
PMID	PMID:26020237	7	26	3702	AT4G10120,AT1G04920,AT5G20280,AT5G41670,AT3G02360,AT5G11110,AT1G64190	SPS4,SPS3-2,SPS1-2,PGD3,PGD2,SPS2-2,PGD1	1.6e-10	2.25e-07	(2015) BABA and Phytophthora nicotianae Induce Resistance to Phytophthora capsici in Chile Pepper (Capsicum annuum).
PMID	PMID:36945724	10	108	3702	AT3G15540,AT5G43700,AT1G15580,AT4G14560,AT1G04250,AT1G04240,AT5G65670,AT4G28640,AT1G04550,AT2G33310	IAA19,IAA4,IAA5,IAA1,IAA17,IAA3,IAA9,IAA11,IAA12,IAA13	2.23e-10	3.09e-07	(2023) Identification of new potential downstream transcriptional targets of the strigolactone pathway including glucosinolate biosynthesis.
PMID	PMID:29461641	6	13	3702	AT3G23030,AT1G04250,AT3G23050,AT1G04550,AT4G14550,AT5G25890	IAA2,IAA17,IAA7,IAA12,IAA14,IAA28	2.4e-10	3.27e-07	(2018) Mutational studies of the AuxIAA proteins in Physcomitrella reveal novel insights into their function.
PMID	PMID:31370805	9	76	3702	AT3G04730,AT3G23030,AT1G04250,AT1G04240,AT3G23050,AT2G22670,AT2G33310,AT3G16500,AT4G29080	IAA16,IAA2,IAA17,IAA3,IAA7,IAA8,IAA13,IAA26,IAA27	2.46e-10	3.31e-07	(2019) Effects of maize organ-specific drought stress response on yields from transcriptome analysis.
PMID	PMID:30463285	8	49	3702	AT1G51950,AT3G15540,AT4G14560,AT1G04250,AT1G04240,AT3G23050,AT4G14550,AT5G25890	IAA18,IAA19,IAA1,IAA17,IAA3,IAA7,IAA14,IAA28	2.5e-10	3.32e-07	(2018) Auxin Controlled by Ethylene Steers Root Development.
PMID	PMID:25909657	9	78	3702	AT3G15540,AT3G23030,AT1G52830,AT3G23050,AT5G65670,AT1G04550,AT2G33310,AT4G14550,AT3G16500	IAA19,IAA2,IAA6,IAA7,IAA9,IAA12,IAA13,IAA14,IAA26	3.04e-10	3.98e-07	(2015) Transcriptome profiling reveals the regulatory mechanism underlying pollination dependent and parthenocarpic fruit set mainly mediated by auxin and gibberellin.
PMID	PMID:29354099	7	29	3702	AT3G15540,AT1G15580,AT4G14560,AT3G23030,AT1G04240,AT1G52830,AT4G28640	IAA19,IAA5,IAA1,IAA2,IAA3,IAA6,IAA11	3.09e-10	4e-07	(2017) Rhizobium sp. IRBG74 Alters Arabidopsis Root Development by Affecting Auxin Signaling.
PMID	PMID:37008481	7	30	3702	AT2G26980,AT5G21326,AT1G30270,AT5G57630,AT5G35410,AT1G01140,AT4G24400	CIPK3,CIPK26,CIPK23,CIPK21,CIPK24,CIPK9,CIPK8	3.8e-10	4.85e-07	(2023) AtCIPK16, a CBL-interacting protein kinase gene, confers salinity tolerance in transgenic wheat.
PMID	PMID:34122488	8	54	3702	AT3G04730,AT1G15580,AT4G14560,AT3G23030,AT3G23050,AT1G04550,AT4G14550,AT5G25890	IAA16,IAA5,IAA1,IAA2,IAA7,IAA12,IAA14,IAA28	5.02e-10	6.32e-07	(2021) Sedentary Plant-Parasitic Nematodes Alter Auxin Homeostasis via Multiple Strategies.
PMID	PMID:36943294	6	16	3702	AT5G43700,AT1G04250,AT1G04240,AT1G52830,AT4G14550,AT5G25890	IAA4,IAA17,IAA3,IAA6,IAA14,IAA28	6.52e-10	8.11e-07	(2023) The microRNA ppe-miR393 mediates auxin-induced peach fruit softening by promoting ethylene production.
PMID	PMID:35069676	6	16	3702	AT3G15540,AT1G04240,AT1G52830,AT4G14550,AT5G25890,AT4G29080	IAA19,IAA3,IAA6,IAA14,IAA28,IAA27	6.52e-10	8.11e-07	(2021) Genome-Wide Identification and Co-Expression Analysis of ARF and IAA Family Genes in Euscaphis konishii: Potential Regulators of Triterpenoids and Anthocyanin Biosynthesis.
PMID	PMID:23472140	7	33	3702	AT3G15540,AT1G15580,AT1G04250,AT1G04240,AT1G52830,AT4G14550,AT1G80390	IAA19,IAA5,IAA17,IAA3,IAA6,IAA14,IAA15	6.79e-10	8.25e-07	(2013) Perturbation of auxin homeostasis by overexpression of wild-type IAA15 results in impaired stem cell differentiation and gravitropism in roots.
PMID	PMID:34858444	10	124	3702	AT3G23030,AT1G04250,AT1G04240,AT1G52830,AT3G23050,AT5G65670,AT1G04550,AT4G14550,AT1G30270,AT4G24400	IAA2,IAA17,IAA3,IAA6,IAA7,IAA9,IAA12,IAA14,CIPK23,CIPK8	7.83e-10	9.39e-07	(2021) Role of Auxin and Nitrate Signaling in the Development of Root System Architecture.
PMID	PMID:31898486	9	88	3702	AT3G04730,AT5G43700,AT4G14560,AT1G52830,AT5G65670,AT4G28640,AT4G14550,AT3G16500,AT4G29080	IAA16,IAA4,IAA1,IAA6,IAA9,IAA11,IAA14,IAA26,IAA27	8.13e-10	9.63e-07	(2020) Global scale transcriptome analysis reveals differentially expressed genes involve in early somatic embryogenesis in Dimocarpus longan Lour.
PMID	PMID:30235789	7	34	3702	AT4G10120,AT2G26080,AT1G04920,AT1G30270,AT4G33010,AT5G20280,AT5G11110	SPS4,GLDP2,SPS3-2,CIPK23,GLDP1,SPS1-2,SPS2-2	8.16e-10	9.63e-07	(2018) Protein Phosphatase (PP2C9) Induces Protein Expression Differentially to Mediate Nitrogen Utilization Efficiency in Rice under Nitrogen-Deficient Condition.
PMID	PMID:32581321	6	17	3702	AT1G51950,AT1G15580,AT4G14560,AT1G04250,AT1G04240,AT3G23050	IAA18,IAA5,IAA1,IAA17,IAA3,IAA7	8.79e-10	1.02e-06	(2020) Genome-wide characterization and expression analyses of the auxinindole-3-acetic acid (AuxIAA) gene family in barley (Hordeum vulgare L.).
PMID	PMID:21252300	5	6	3702	AT3G15540,AT1G04250,AT1G04240,AT1G52830,AT1G04550	IAA19,IAA17,IAA3,IAA6,IAA12	9.33e-10	1.07e-06	(2011) Identical amino acid substitutions in the repression domain of auxinindole-3-acetic acid proteins have contrasting effects on auxin signaling.
PMID	PMID:36553463	7	35	3702	AT4G14560,AT1G04250,AT3G23050,AT2G22670,AT1G04550,AT4G14550,AT5G25890	IAA1,IAA17,IAA7,IAA8,IAA12,IAA14,IAA28	9.76e-10	1.1e-06	(2022) Identification, Classification and Characterization Analysis of FBXL Gene in Cotton.
PMID	PMID:35050466	8	60	3702	AT3G15540,AT1G15580,AT4G14560,AT1G04250,AT1G04240,AT1G52830,AT1G04100,AT4G14550	IAA19,IAA5,IAA1,IAA17,IAA3,IAA6,IAA10,IAA14	1.07e-09	1.2e-06	(2022) CIN-like TCP13 is essential for plant growth regulation under dehydration stress.
PMID	PMID:34502153	8	60	3702	AT4G10120,AT3G04730,AT3G23030,AT2G22670,AT1G04550,AT2G33310,AT3G16500,AT5G25890	SPS4,IAA16,IAA2,IAA8,IAA12,IAA13,IAA26,IAA28	1.07e-09	1.2e-06	(2021) Overdominance at the Gene Expression Level Plays a Critical Role in the Hybrid Root Growth of Brassica napus.
PMID	PMID:37229207	7	36	3702	AT3G04730,AT3G15540,AT3G23030,AT1G04250,AT1G04240,AT3G23050,AT1G04550	IAA16,IAA19,IAA2,IAA17,IAA3,IAA7,IAA12	1.16e-09	1.27e-06	(2023) Comparative transcriptome analysis provides insights into molecular pathway and genes associated with head-type formation and phenotypic divergence in Chinese cabbage.
PMID	PMID:34420252	6	18	3702	AT1G51950,AT3G23050,AT1G04100,AT3G16500,AT5G25890,AT4G29080	IAA18,IAA7,IAA10,IAA26,IAA28,IAA27	1.17e-09	1.27e-06	(2021) Manipulation of auxin signalling by plant viruses.
PMID	PMID:28111153	6	18	3702	AT3G15540,AT1G15580,AT3G23030,AT1G52830,AT3G23050,AT5G65670	IAA19,IAA5,IAA2,IAA6,IAA7,IAA9	1.17e-09	1.27e-06	(2017) Plant Stress Tolerance Requires Auxin-Sensitive AuxIAA Transcriptional Repressors.
PMID	PMID:26672614	6	18	3702	AT5G43700,AT4G14560,AT3G23030,AT1G04550,AT4G14550,AT5G25890	IAA4,IAA1,IAA2,IAA12,IAA14,IAA28	1.17e-09	1.27e-06	(2016) Conserved and unique features of the homeologous maize AuxIAA proteins ROOTLESS WITH UNDETECTABLE MERISTEM 1 and RUM1-like 1.
PMID	PMID:26082787	6	19	3702	AT3G15540,AT4G14560,AT1G52830,AT3G23050,AT4G28640,AT4G14550	IAA19,IAA1,IAA6,IAA7,IAA11,IAA14	1.53e-09	1.6e-06	(2015) Expression of wild-type PtrIAA14.1, a poplar AuxIAA gene causes morphological changes in Arabidopsis.
PMID	PMID:28841197	6	20	3702	AT4G14560,AT3G23030,AT1G04250,AT1G04240,AT1G04550,AT4G14550	IAA1,IAA2,IAA17,IAA3,IAA12,IAA14	1.98e-09	2.05e-06	(2017) Auxin Response Factor Genes Repertoire in Mulberry: Identification, and Structural, Functional and Evolutionary Analyses.
PMID	PMID:22590525	8	67	3702	AT3G15540,AT1G15580,AT4G14560,AT3G23030,AT3G23050,AT1G04550,AT4G14550,AT1G03790	IAA19,IAA5,IAA1,IAA2,IAA7,IAA12,IAA14,TZF4	2.38e-09	2.44e-06	(2012) Hypocotyl transcriptome reveals auxin regulation of growth-promoting genes through GA-dependent and -independent pathways.
PMID	PMID:31687272	5	8	3702	AT3G15540,AT1G04250,AT3G23050,AT4G14550,AT5G25890	IAA19,IAA17,IAA7,IAA14,IAA28	2.58e-09	2.62e-06	(2019) Overexpression of MdIAA9 confers high tolerance to osmotic stress in transgenic tobacco.
PMID	PMID:35269837	11	188	3702	AT3G04730,AT5G43700,AT4G14560,AT3G23030,AT2G22670,AT5G65670,AT4G28640,AT2G33310,AT4G14550,AT3G16500,AT4G29080	IAA16,IAA4,IAA1,IAA2,IAA8,IAA9,IAA11,IAA13,IAA14,IAA26,IAA27	2.64e-09	2.65e-06	(2022) Thidiazuron Promotes Leaf Abscission by Regulating the Crosstalk Complexities between Ethylene, Auxin, and Cytokinin in Cotton.
PMID	PMID:32079138	8	69	3702	AT3G04730,AT3G15540,AT1G15580,AT4G14560,AT3G23030,AT1G04250,AT3G23050,AT5G25890	IAA16,IAA19,IAA5,IAA1,IAA2,IAA17,IAA7,IAA28	2.94e-09	2.92e-06	(2020) Current Perspectives on the Auxin-Mediated Genetic Network that Controls the Induction of Somatic Embryogenesis in Plants.
PMID	PMID:35328357	7	42	3702	AT3G15540,AT3G23030,AT1G04250,AT1G04240,AT2G22670,AT1G04100,AT1G04550	IAA19,IAA2,IAA17,IAA3,IAA8,IAA10,IAA12	3.02e-09	2.97e-06	(2022) The Photoperiod Stress Response in Arabidopsis thaliana Depends on Auxin Acting as an Antagonist to the Protectant Cytokinin.
NetworkNeighborAL	CL:25765	21	57	3702	AT3G04730,AT1G51950,AT5G43700,AT1G15580,AT4G14560,AT3G23030,AT1G04250,AT1G04240,AT1G52830,AT3G23050,AT2G22670,AT5G65670,AT1G04100,AT4G28640,AT1G04550,AT2G33310,AT4G14550,AT3G16500,AT1G80390,AT5G25890,AT4G29080	IAA16,IAA18,IAA4,IAA5,IAA1,IAA2,IAA17,IAA3,IAA6,IAA7,IAA8,IAA9,IAA10,IAA11,IAA12,IAA13,IAA14,IAA26,IAA15,IAA28,IAA27	9.27e-32	5.19e-28	AUX/IAA family, and Auxin binding
NetworkNeighborAL	CL:25767	19	43	3702	AT3G04730,AT1G51950,AT5G43700,AT1G15580,AT4G14560,AT3G23030,AT1G04250,AT1G04240,AT1G52830,AT3G23050,AT2G22670,AT5G65670,AT1G04100,AT4G28640,AT1G04550,AT2G33310,AT3G16500,AT1G80390,AT4G29080	IAA16,IAA18,IAA4,IAA5,IAA1,IAA2,IAA17,IAA3,IAA6,IAA7,IAA8,IAA9,IAA10,IAA11,IAA12,IAA13,IAA26,IAA15,IAA27	4.84e-30	9.03e-27	AUX/IAA family, and Auxin binding
NetworkNeighborAL	CL:25768	18	37	3702	AT3G04730,AT1G51950,AT5G43700,AT4G14560,AT3G23030,AT1G04250,AT1G04240,AT1G52830,AT3G23050,AT2G22670,AT5G65670,AT1G04100,AT4G28640,AT1G04550,AT2G33310,AT3G16500,AT1G80390,AT4G29080	IAA16,IAA18,IAA4,IAA1,IAA2,IAA17,IAA3,IAA6,IAA7,IAA8,IAA9,IAA10,IAA11,IAA12,IAA13,IAA26,IAA15,IAA27	4.13e-29	5.79e-26	AUX/IAA family
NetworkNeighborAL	CL:25769	17	31	3702	AT3G04730,AT1G51950,AT5G43700,AT4G14560,AT3G23030,AT1G04250,AT1G04240,AT1G52830,AT3G23050,AT2G22670,AT5G65670,AT1G04100,AT4G28640,AT1G04550,AT2G33310,AT3G16500,AT4G29080	IAA16,IAA18,IAA4,IAA1,IAA2,IAA17,IAA3,IAA6,IAA7,IAA8,IAA9,IAA10,IAA11,IAA12,IAA13,IAA26,IAA27	3.07e-28	3.43e-25	AUX/IAA family
NetworkNeighborAL	CL:25771	14	24	3702	AT3G04730,AT1G51950,AT5G43700,AT4G14560,AT3G23030,AT1G04250,AT1G04240,AT1G52830,AT2G22670,AT5G65670,AT1G04100,AT4G28640,AT2G33310,AT4G29080	IAA16,IAA18,IAA4,IAA1,IAA2,IAA17,IAA3,IAA6,IAA8,IAA9,IAA10,IAA11,IAA13,IAA27	1.01e-23	7.1e-21	AUX/IAA family
NetworkNeighborAL	CL:25772	11	19	3702	AT3G04730,AT5G43700,AT4G14560,AT3G23030,AT1G04250,AT1G04240,AT1G52830,AT5G65670,AT4G28640,AT2G33310,AT4G29080	IAA16,IAA4,IAA1,IAA2,IAA17,IAA3,IAA6,IAA9,IAA11,IAA13,IAA27	7.65e-19	4.76e-16	AUX/IAA family
NetworkNeighborAL	CL:25774	7	11	3702	AT3G04730,AT5G43700,AT4G14560,AT3G23030,AT1G04240,AT4G28640,AT4G29080	IAA16,IAA4,IAA1,IAA2,IAA3,IAA11,IAA27	1.26e-12	7.08e-10	AUX/IAA family
NetworkNeighborAL	CL:19737	7	35	3702	AT5G21326,AT1G30270,AT5G37500,AT5G57630,AT3G02850,AT1G01140,AT4G24400	CIPK26,CIPK23,GORK,CIPK21,SKOR,CIPK9,CIPK8	9.76e-10	4.97e-07	Mixed, incl. Calcineurin B-like, and NAF domain
NetworkNeighborAL	CL:25775	4	6	3702	AT5G43700,AT4G14560,AT3G23030,AT1G04240	IAA4,IAA1,IAA2,IAA3	9.37e-08	4.04e-05	AUX/IAA protein, and Tissue morphogenesis
NetworkNeighborAL	CL:19738	5	24	3702	AT1G30270,AT5G57630,AT3G02850,AT1G01140,AT4G24400	CIPK23,CIPK21,SKOR,CIPK9,CIPK8	2.24e-07	8.38e-05	Calcineurin B-like, and NAF domain
NetworkNeighborAL	CL:25786	3	5	3702	AT3G04730,AT4G28640,AT4G29080	IAA16,IAA11,IAA27	5.5e-06	0.0019	AUX/IAA family
NetworkNeighborAL	CL:25800	3	5	3702	AT1G04250,AT1G52830,AT5G65670	IAA17,IAA6,IAA9	5.5e-06	0.0019	AUX/IAA protein, and Transport inhibitor response 1 domain
NetworkNeighborAL	CL:25809	3	5	3702	AT1G51950,AT2G22670,AT1G04100	IAA18,IAA8,IAA10	5.5e-06	0.0019	AUX/IAA family
NetworkNeighborAL	CL:7551	3	12	3702	AT5G41670,AT3G02360,AT1G64190	PGD3,PGD2,PGD1	4.36e-05	0.0129	Pentose-phosphate shunt, oxidative branch
NetworkNeighborAL	CL:33669	3	13	3702	AT5G49130,AT1G71870,AT4G29140	DTX55,DTX54,DTX51	5.35e-05	0.0143	Mixed, incl. Multi antimicrobial extrusion protein DinF-like, and O-acyltransferase, WSD1-like, N-terminal

## Sheet: Table S5
Table S5. Genomes and sequencing data used for population genetic studies
species	download source	name	author(s)	doi	usage	author(s) (genetic diversity file)	doi (genetic diversity file)	mapped on
Arabidopsis thaliana	NCBI	GCF_000001735.4	1001 Genome Consortium	10.1016/j.cell.2016.05.063	Reference	1001 Genome Consortium	10.1016/j.cell.2016.05.063	N/A
Arabidopsis arenosa	NCBI	GCA_026151155.1	Bramsiepe et al.	10.1111/tpj.16401	Ancestral allele inference	N/A	N/A	A. thaliana
Arabidopsis arenosa	NCBI	GCA_902996965.1	Liu et al.	10.1038/s41467-020-19153-6	Ancestral allele inference	N/A	N/A	A. thaliana
Arabidopsis arenosa	NCBI	GCA_905216605.1	Barragan et al.	10.1093/g3journal/jkad290	Ancestral allele inference	N/A	N/A	A. thaliana
Arabidopsis halleri	NCBI	GCA_964271285.1	Pavan et al.	10.1093/pcp/pcaf004	Ancestral allele inference	N/A	N/A	A. thaliana
Arabidopsis halleri	NCBI	GCA_900078215.1	Briskine et al.	10.1111/1755-0998.12604	Ancestral allele inference	N/A	N/A	A. thaliana
Arabidopsis halleri	NCBI	GCA_011037025.1	Legrand et al.	10.1186/s13100-019-0171-6	Ancestral allele inference	N/A	N/A	A. thaliana
Arabidopsis halleri	Phytozome	v2.03	DOE-JGI, http://phytozome.jgi.doe.gov/	N/A	Ancestral allele inference	N/A	N/A	A. thaliana
Arabidopsis lyrata	NCBI	GCA_944990045.1	Kolesnikova et al.	10.1093/molbev/msad122	Ancestral allele inference	N/A	N/A	A. thaliana
Arabidopsis lyrata	NCBI	GCA_000004255.1	Hu et al.	10.1038/ng.807	Ancestral allele inference	N/A	N/A	A. thaliana
Arabidopsis lyrata	NCBI	GCA_026151145.1	Bramsiepe et al.	10.1111/tpj.16401	Ancestral allele inference	N/A	N/A	A. thaliana
Arabidopsis lyrata	NCBI	GCA_900205625.1	Paape et al.	10.1038/s41467-018-06108-1	Ancestral allele inference	N/A	N/A	A. thaliana
Arabidopsis suecica	NCBI	GCA_019202805.1	Jiang et al.	10.1038/s41559-021-01523-y	Ancestral allele inference	N/A	N/A	A. thaliana
Arabidopsis suecica	NCBI	GCA_905175345.1	Burns et al.	10.1038/s41559-021-01525-w	Ancestral allele inference	N/A	N/A	A. thaliana
Brachypodium distachyon	NCBI	GCF_000005505.3	The International Brachypodium initiative	10.1038/nature08747	Reference	Gordon et al.	10.1038/s41467-017-02292-8	N/A
Brachypodium stacei	NCBI	GCA_036872525.1	Chen et al.	10.1186/s13059-024-03206-w	Ancestral allele inference	N/A	N/A	B. distachyon
Brachypodium stacei	Phytozome	v1.1	Gordon et al.	10.1038/s41467-020-17302-5	Ancestral allele inference	N/A	N/A	B. distachyon
Brachypodium sylvaticum	NCBI	GCA_040967415.1	Schaefer & Pirro	N/A	Ancestral allele inference	N/A	N/A	B. distachyon
Brachypodium sylvaticum	Phytozome	Ain-1 v2.1	DOE-JGI, http://phytozome.jgi.doe.gov/	N/A	Ancestral allele inference	N/A	N/A	B. distachyon
Lemna minor	CoGe	27408 (lm5500)	An et al.	10.3389/fchem.2018.00230	Reference	Senevirathna et al.	10.1016/j.aquabot.2023.103687	N/A
Marchantia polymorpha	MarPolBase	MpTak_v6.1	Montgomery et al.	10.1016/j.cub.2019.12.015	Reference	Beaulieu et al.	10.1038/s41588-024-02071-4	N/A
Medicago truncatula	Legume Information System	medtr.A17.gnm5.ann1_6	Pecrix et al.	10.1038/s41477-018-0286-7	Reference	Nandety et al.	10.1016/j.fmre.2022.06.018	N/A
Medicago arabica	Legume Information System	HM318	Epstein & Young	N/A	Ancestral allele inference (from available VCF file)	Nandety et al.	10.1016/j.fmre.2022.06.018	M. truncatula (previous work, not this paper)
Medicago arborea	Legume Information System	HM319	Epstein & Young	N/A	Ancestral allele inference (from available VCF file)	Nandety et al.	10.1016/j.fmre.2022.06.018	M. truncatula (previous work, not this paper)
Medicago cancellata	Legume Information System	HM320	Epstein & Young	N/A	Ancestral allele inference (from available VCF file)	Nandety et al.	10.1016/j.fmre.2022.06.018	M. truncatula (previous work, not this paper)
Medicago coronata	Legume Information System	HM322	Epstein & Young	N/A	Ancestral allele inference (from available VCF file)	Nandety et al.	10.1016/j.fmre.2022.06.018	M. truncatula (previous work, not this paper)
Medicago doliata	Legume Information System	HM323	Epstein & Young	N/A	Ancestral allele inference (from available VCF file)	Nandety et al.	10.1016/j.fmre.2022.06.018	M. truncatula (previous work, not this paper)
Medicago italica	Legume Information System	HM324	Epstein & Young	N/A	Ancestral allele inference (from available VCF file)	Nandety et al.	10.1016/j.fmre.2022.06.018	M. truncatula (previous work, not this paper)
Medicago laciniata	Legume Information System	HM325	Epstein & Young	N/A	Ancestral allele inference (from available VCF file)	Nandety et al.	10.1016/j.fmre.2022.06.018	M. truncatula (previous work, not this paper)
Medicago littoralis	Legume Information System	HM030, HM258	Epstein & Young	N/A	Ancestral allele inference (from available VCF file)	Nandety et al.	10.1016/j.fmre.2022.06.018	M. truncatula (previous work, not this paper)
Medicago lupulina	Legume Information System	HM326	Epstein & Young	N/A	Ancestral allele inference (from available VCF file)	Nandety et al.	10.1016/j.fmre.2022.06.018	M. truncatula (previous work, not this paper)
Medicago minima	Legume Information System	HM327	Epstein & Young	N/A	Ancestral allele inference (from available VCF file)	Nandety et al.	10.1016/j.fmre.2022.06.018	M. truncatula (previous work, not this paper)
Medicago murex	Legume Information System	HM250, HM255, HM274, HM328	Epstein & Young	N/A	Ancestral allele inference (from available VCF file)	Nandety et al.	10.1016/j.fmre.2022.06.018	M. truncatula (previous work, not this paper)
Medicago noeana	Legume Information System	HM329	Epstein & Young	N/A	Ancestral allele inference (from available VCF file)	Nandety et al.	10.1016/j.fmre.2022.06.018	M. truncatula (previous work, not this paper)
Medicago polymorpha	Legume Information System	HM330	Epstein & Young	N/A	Ancestral allele inference (from available VCF file)	Nandety et al.	10.1016/j.fmre.2022.06.018	M. truncatula (previous work, not this paper)
Medicago praecox	Legume Information System	HM337	Epstein & Young	N/A	Ancestral allele inference (from available VCF file)	Nandety et al.	10.1016/j.fmre.2022.06.018	M. truncatula (previous work, not this paper)
Medicago prostrata	Legume Information System	HM339	Epstein & Young	N/A	Ancestral allele inference (from available VCF file)	Nandety et al.	10.1016/j.fmre.2022.06.018	M. truncatula (previous work, not this paper)
Medicago ridiculoides	Legume Information System	HM332	Epstein & Young	N/A	Ancestral allele inference (from available VCF file)	Nandety et al.	10.1016/j.fmre.2022.06.018	M. truncatula (previous work, not this paper)
Medicago rigidula	Legume Information System	HM331	Epstein & Young	N/A	Ancestral allele inference (from available VCF file)	Nandety et al.	10.1016/j.fmre.2022.06.018	M. truncatula (previous work, not this paper)
Medicago rotata	Legume Information System	HM333	Epstein & Young	N/A	Ancestral allele inference (from available VCF file)	Nandety et al.	10.1016/j.fmre.2022.06.018	M. truncatula (previous work, not this paper)
Medicago ruthenica	Legume Information System	HM335	Epstein & Young	N/A	Ancestral allele inference (from available VCF file)	Nandety et al.	10.1016/j.fmre.2022.06.018	M. truncatula (previous work, not this paper)
Medicago sativa	Legume Information System	HM102, HM336	Epstein & Young	N/A	Ancestral allele inference (from available VCF file)	Nandety et al.	10.1016/j.fmre.2022.06.018	M. truncatula (previous work, not this paper)
Medicago soleirolii	Legume Information System	HM338	Epstein & Young	N/A	Ancestral allele inference (from available VCF file)	Nandety et al.	10.1016/j.fmre.2022.06.018	M. truncatula (previous work, not this paper)
Medicago tricycla	Legume Information System	HM029	Epstein & Young	N/A	Ancestral allele inference (from available VCF file)	Nandety et al.	10.1016/j.fmre.2022.06.018	M. truncatula (previous work, not this paper)
Medicago turbinata	Legume Information System	HM252, HM334	Epstein & Young	N/A	Ancestral allele inference (from available VCF file)	Nandety et al.	10.1016/j.fmre.2022.06.018	M. truncatula (previous work, not this paper)
Nelumbo nucifera	NCBI	GCF_000365185.1	Ming et al.	10.1186/gb-2013-14-5-r41	Reference	Li et al.	10.1186/s12864-019-6376-8	N/A
Sparagnium stoloniferum	FigShare	Sparagnium stoloniferum (sic)	Zou et al.	10.1111/1755-0998.13850	Reference	Zou et al.	10.1111/1755-0998.13850	N/A
Zostera marina	NCBI	GCA_001185155.1	Olsen et al.	10.1038/nature16548	Reference	Yu et al.	10.1594/PANGAEA.910541	N/A
Nymphoides indica	CNGBdb	CNA0051889	Yang et al.	10.1111/nph.19264	Reference	N/A	N/A	N/A
Nymphoides peltata	NCBI	PRJDB15267	Asakawa et al.	10.1016/j.aquabot.2023.103720	Computing genetic variation by mapping on reference	N/A	N/A	N. indica
Pontederia crassipes	NCBI	GCA_030549335.1	Qian	10.1186/s12863-025-01317-2	Reference	N/A	N/A	N/A
Pontederia crassipes	NCBI	PRJNA862356	da Cunha et al.	10.1111/mec.16664	Computing genetic variation by mapping on reference	N/A	N/A	P. crassipes
Posidonia oceanica	NCBI	GCA_037176725.1	Jenkins et al.	N/A	Reference	N/A	N/A	N/A
Posidonia oceanica	Dryad	N/A	Nguyen et al.	10.5061/dryad.1zcrjdfxp	Computing genetic variation by mapping on reference	N/A	N/A	P. oceanica
Ranunculus penicilatus	This paper	N/A	Cabanac et al.	N/A	Reference	N/A	N/A	N/A
Ranunculus bungei	NCBI	PRJNA820952	Yu et al.	10.1007/s00299-023-03005-w	Computing genetic variation by mapping on reference	N/A	N/A	R. penicilatus

## Sheet: Table S6
Table S6. Genomes used for the study of expansions and contractions of multigenic families and for inter-species evolution
species	download source	assembly name	author(s)	doi	type	genome type	proteins inferred with Braker
Zostera marina	NCBI	GCA_001185155.1	Olsen et al.	10.1038/nature16548	aquatic	nuclear	no
Spirodela polyrhiza	NCBI	GCA_024713555.1	Pasaribu et al.	10.1111/nph.18941	aquatic	nuclear	yes
Typha latifolia	NCBI	GCF_019914945.1	Michael	N/A	aquatic	nuclear	yes
Sparagnium stoloniferum	FigShare	Sparagnium stoloniferum (sic)	Zou et al.	10.1111/1755-0998.13850	aquatic	nuclear	no
Acorus calamus	NCBI	GCA_030737845.1	Ma et al.	10.1038/s41467-023-38829-3	aquatic	nuclear	no
Acorus americanus	Phytozome	v1.1	DOE-JGI, http://phytozome.jgi.doe.gov/	N/A	aquatic	nuclear	no
Pontederia crassipes	NCBI	GCA_030549335.1	Qian et al.	10.1186/s12863-025-01317-2	aquatic	nuclear	no
Thalia dealbata	NCBI	GCA_030544415.1	Tang et al.	10.3389/fpls.2023.1183361	aquatic	nuclear	yes
Hydrocotyle leucocephala	Phytozome	HAP1 v2.1	DOE-JGI, http://phytozome.jgi.doe.gov/	N/A	aquatic	nuclear	no
Trapa natans	NCBI	GCA_035582545.1	Zhang et al.	10.1093/hr/uhad203	aquatic	nuclear	no
Nasturtium officinale	NCBI	GCA_963854855.1	Wellcome Sanger Tree of Life Programme	N/A	aquatic	nuclear	yes
Utricularia gibba	NCBI	GCA_002189035.1	Lan et al.	10.1073/pnas.1702072114	aquatic	nuclear	yes
Utricularia reniformis	NCBI	GCA_009725065.1	Silva et al.	10.3390/ijms21010003	aquatic	nuclear	yes
Nymphoides indica	CNGBdb	CNA0046512	Yang et al.	10.1093/dnares/dsac022	aquatic	nuclear	no
Nelumbo nucifera	NCBI	GCF_000365185.1	Ming et al.	10.1186/gb-2013-14-5-r41	aquatic	nuclear	no
Ceratophyllum demersum	CoGe	56572	Yang et al.	10.1038/s41477-020-0594-6	aquatic	nuclear	yes
Nymphea colorata	NCBI	GCF_008831285.2	Zhang et al.	10.1038/s41586-019-1852-5	aquatic	nuclear	no
Brasenia schreberi	NCBI	GCA_036023115.1	Wu et al.	10.1186/s12863-024-01212-2	aquatic	nuclear	yes
Saururus chinensis	NCBI	GCA_035235625.1	Luo et al.	10.1038/s41597-024-03229-9	aquatic	nuclear	yes
Amborella trichopoda	NCBI	GCF_000471905.2	Amborella Genome Project	10.1126/science.1241089	terrestrial	nuclear	no
Chloranthus sessilifolius	NCBI	GCA_021018995.1	Ma et al.	10.1038/s41467-021-26931-3	terrestrial	nuclear	yes
Aristolochia fimbriata	NCBI	GCA_019845555.1	Qin et al.	10.1038/s41477-021-00990-2	terrestrial	nuclear	no
Aristolochia contorta	NCBI	GCA_022405105.1	Cui et al.	10.1093/hr/uhac005	terrestrial	nuclear	yes
Magnolia sinica	NCBI	GCF_029962835.1	Cai et al.	10.1093/gigascience/giad110	terrestrial	nuclear	no
Zantedeschia hybrid cultivar	NCBI	GCA_030544215.1	Wang et al.	10.1038/s41597-023-02516-1	terrestrial	nuclear	yes
Amorphophallus konjac	NCBI	GCA_022559845.1	Gao et al.	10.1016/j.csbj.2022.02.009	terrestrial	nuclear	yes
Colocasia esculenta	NCBI	GCA_014218235.1	Yin et al.	10.1111/1755-0998.13239	terrestrial	nuclear	yes
Ischnosiphon puberulus	NCBI	GCA_040436625.1	Palma-Silva et al.	10.1111/mec.17437	terrestrial	nuclear	yes
Canna indica	NCBI	GCA_034359265.1	Liu et al.	10.1016/j.ijbiomac.2023.126148	terrestrial	nuclear	no
Musa troglodytarum	NCBI	GCA_023547065.1	Li et al.	10.1186/s12915-022-01391-3	terrestrial	nuclear	no
Tillandsia fasciculata	NCBI	GCA_029168755.2	Crego et al.	10.1101/2023.02.01.526631	terrestrial	nuclear	yes
Brachypodium distachyon	NCBI	GCF_000005505.3	The International Brachypodium initiative	10.1038/nature08747	terrestrial	nuclear	no
Aegilops umbellulata	NCBI	GCA_032464435.1	Abrouk et al.	10.1038/s41597-023-02658-2	terrestrial	nuclear	yes
Macadamia integriofolia	NCBI	GCF_013358625.1	Nock et al.	10.1534/g3.120.401326	terrestrial	nuclear	no
Hakea prostrata	NCBI	GCA_041222555.1	Nestor et al.	10.1111/pce.15088	terrestrial	nuclear	no
Telopea speciosissima	NCBI	GCF_018873765.1	Chen et al.	10.1111/1755-0998.13574	terrestrial	nuclear	no
Lagerstroemia speciosa	NCBI	GCA_037672795.1	Wan et al.	10.1038/s41597-024-04109-y	terrestrial	nuclear	yes
Punica granatum	NCBI	GCF_007655135.1	Luo et al.	10.1111/pbi.13260	terrestrial	nuclear	no
Eucalyptus grandis	NCBI	GCF_016545825.1	Myburg et al.	10.1038/nature13308	terrestrial	nuclear	no
Cardamine chenopodiifolia	NCBI	GCA_963922655.1	Emonet et al.	10.1111/nph.19965	terrestrial	nuclear	yes
Capsella bursa-pastoris	NCBI	GCA_036452645.1	Liu, Liu et al.	10.1002/bod2.70001	terrestrial	nuclear	yes
Arabidopsis thaliana	NCBI	GCF_000001735.4	1001 Genome Consortium	10.1016/j.cell.2016.05.063	terrestrial	nuclear	no
Jasminum sambac	NCBI	GCA_018223645.1	Xu et al.	10.1093/jxb/erac464	terrestrial	nuclear	yes
Salvia milthiorrhiza	NCBI	GCF_028751815.1	Pan et al.	10.1093/hr/uhad069	terrestrial	nuclear	no
Genlisea aurea	NCBI	GCA_000441915.1	Leushkin et al.	10.1186/1471-2164-14-476	terrestrial	nuclear	no
Cynara cardunculus	NCBI	GCF_001531365.2	Scaglione et al.	10.1038/srep19427	terrestrial	nuclear	no
Lactuca sativa	NCBI	GCF_002870075.4	Reyes-Chin-Wo et al.	10.1038/ncomms14953	terrestrial	nuclear	no
Helianthus annuus	NCBI	GCF_002127325.2	Badouin et al.	10.1038/nature22380	terrestrial	nuclear	no
Hedera helix	NCBI	GCA_947179155.2	Christenhusz et al.	10.12688/wellcomeopenres.19662.1	terrestrial	nuclear	yes
Panax ginseng	NCBI	GCA_020205605.1	Wang et al.	10.1038/s41467-022-29561-5	terrestrial	nuclear	yes
Daucus carota	NCBI	GCF_001625215.2	Iorizzo et al.	10.1038/ng.3565	terrestrial	nuclear	no
Trithuria inconspicua	NCBI	NC_020372.1	Goremykin et al.	10.1093/sysbio/sys070	aquatic	chloroplast	no
Cabomba caroliniana	NCBI	NC_031505.1	Gruenstaeudl et al.	10.1007/s00606-017-1436-5	aquatic	chloroplast	no
Barclaya longifolia	NCBI	NC_035633.2	Gruenstaeudl et al.	10.1007/s00606-017-1436-5	aquatic	chloroplast	no
Acorus calamus	NCBI	NC_010093.1	Peery et al.	N/A	aquatic	chloroplast	no
Acorus tatarinowii	NCBI	NC_045294.1	Yan-Xiong et al.	10.1080/23802359.2019.1694852	aquatic	chloroplast	no
Zostera marina	NCBI	NC_036014.1	Xing & Guo	10.1007/s12686-017-0839-5	aquatic	chloroplast	no
Cymodocea rotundata	NCBI	NC_079845.1	Liu et al.	10.1080/23802359.2024.2432370	aquatic	chloroplast	no
Halophila ovalis	NCBI	NC_068806.1	Chen et al.	10.1186/s12870-023-04119-9	aquatic	chloroplast	no
Heteranthera callifolia	NCBI	NC_063306.1	Li et al.	10.1111/jse.12744	aquatic	chloroplast	no
Pontederia crassipes	NCBI	NC_046773.1	Ma & Lu	10.1080/23802359.2019.1667901	aquatic	chloroplast	no
Cyperus exaltatus	NCBI	NC_054300.1	Yang & Tang	N/A	aquatic	chloroplast	no
Sparganium angustifolium	NCBI	NC_058795.1	You et al.	10.1080/23802359.2022.2135395	aquatic	chloroplast	no
Thalia dealbata	NCBI	NC_086578.1	Luo	N/A	aquatic	chloroplast	no
Nelumbo nucifera	NCBI	NC_025339.1	Peery et al.	N/A	aquatic	chloroplast	no
Nelumbo lutea	NCBI	NC_015605.1	Wu et al.	10.1186/s12870-014-0289-0	aquatic	chloroplast	no
Caltha palustris	NCBI	NC_041532.1	Zhai et al.	10.1016/j.ympev.2019.02.024	aquatic	chloroplast	no
Ranunculus pekinensis	NCBI	NC_060613.1	Liu et al.	10.1080/23802359.2022.2073841	aquatic	chloroplast	no
Aldrovanda vesiculosa	NCBI	NC_035416.1	Nevill et al.	10.1093/gbe/evz005	aquatic	chloroplast	no
Alternanthera philoxeroides	NCBI	NC_042798.1	Horvath et al.	10.1101/2023.06.16.545218	aquatic	chloroplast	no
Persicaria amphibia	NCBI	NC_071233.1	Choi et al.	10.3390/d14080641	aquatic	chloroplast	no
Myriophyllum spicatum	NCBI	NC_037885.1	Dong et al.	10.1016/j.ympev.2018.04.033	aquatic	chloroplast	no
Myriophyllum aquaticum	NCBI	NC_048889.1	Zhang	N/A	aquatic	chloroplast	no
Apinagia fucoides	NCBI	NC_059684.1	Bedoya et al.	10.3389/fpls.2019.01035	aquatic	chloroplast	no
Trapa bicornis	NCBI	NC_049010.1	Sun et al.	10.1080/23802359.2020.1788432	aquatic	chloroplast	no
Trapa natans	NCBI	NC_042895.1	Wagutu et al.	10.1080/23802359.2021.1927873	aquatic	chloroplast	no
Cardamine lyrata	NCBI	NC_062128.1	Xu et al.	10.1080/23802359.2022.2079106	aquatic	chloroplast	no
Nasturtium officinale	NCBI	NC_009275.1	Hosouchi et al.	N/A	aquatic	chloroplast	no
Hydrostachys polymorpha	NCBI	NC_044847.1	Fu et al.	10.1016/j.ympev.2019.106601	aquatic	chloroplast	no
Hydrostachys imbricata	NCBI	NC_044799.1	Fu et al.	10.1016/j.ympev.2019.106601	aquatic	chloroplast	no
Limnophila sessiliflora	NCBI	NC_063679.1	Dong et al.	10.1080/23802359.2023.2209390	aquatic	chloroplast	no
Utricularia gibba	NCBI	NC_021449.1	Ibarra-Laclette et al.	10.1038/nature12132	aquatic	chloroplast	no
Hydrocotyle ranunculoides	NCBI	NC_082577.1	Yan et al.	10.3390/ijms242316629	aquatic	chloroplast	no
Cicuta virosa	NCBI	NC_037711.1	Lee et al.	N/A	aquatic	chloroplast	no
Amborella trichopoda	NCBI	NC_005086.1	Goremykin et al.	10.1093/molbev/msg159	terrestrial	chloroplast	no
Chloranthus spicatus	NCBI	NC_009598.1	Hansen et al.	10.1016/j.ympev.2007.06.004	terrestrial	chloroplast	no
Aristolochia contorta	NCBI	NC_036152.1	Zhou et al.	10.3390/ijms18091839	terrestrial	chloroplast	no
Amorphophallus konjac	NCBI	NC_046702.1	Hu et al.	10.1080/23802359.2019.1606683	terrestrial	chloroplast	no
Colocasia esculenta	NCBI	NC_016753.1	Ahmed et al.	10.1093/gbe/evs110	terrestrial	chloroplast	no
Zantedeschia hybrid cultivar	NCBI	NC_041553.1	Kim et al.	10.1080/23802359.2020.1827060	terrestrial	chloroplast	no
Anigozanthos flavidus	NCBI	NC_040160.1	Givnish et al.	10.1002/ajb2.1178	terrestrial	chloroplast	no
Callisia insignis	NCBI	NC_071224.1	Jung	N/A	terrestrial	chloroplast	no
Commelina benghalensis	NCBI	NC_072999.1	Wang et al.	10.1080/23802359.2024.2347508	terrestrial	chloroplast	no
Aegilops umbellulata	NCBI	NC_046696.1	Li et al.	N/A	terrestrial	chloroplast	no
Tillandsia fasciculata	NCBI	NC_081648.1	Vera-Paz et al.	10.3389/fpls.2023.1205511	terrestrial	chloroplast	no
Brachypodium distachyon	NCBI	NC_011032.1	Bortiri et al.	10.1186/1756-0500-1-61	terrestrial	chloroplast	no
Heliconia bihai	NCBI	NC_086671.1	Cheng et al.	10.3389/fpls.2024.1535549	terrestrial	chloroplast	no
Zingiber officinale	NCBI	NC_044775.1	Cui et al.	10.3390/plants8080283	terrestrial	chloroplast	no
Musa troglodytarum	NCBI	NC_056833.1	Song et al.	10.3389/fpls.2022.832884	terrestrial	chloroplast	no
Macadamia integriofolia	NCBI	NC_025288.1	Nock et al.	10.1186/1471-2164-15-S9-S13	terrestrial	chloroplast	no
Sabia parviflora	NCBI	NC_059863.1	Chen et al.	10.1080/23802359.2021.1935350	terrestrial	chloroplast	no
Helicia shweliensis	NCBI	NC_045942.1	Wang et al.	10.1080/23802359.2019.1640086	terrestrial	chloroplast	no
Calathodes oxycarpa	NCBI	NC_041475.1	Zhai et al.	10.1016/j.ympev.2019.02.024	terrestrial	chloroplast	no
Ranunculus macranthus	NCBI	NC_008796.1	Raubeson et al.	10.1186/1471-2164-8-174	terrestrial	chloroplast	no
Callianthemum taipaicum	NCBI	NC_041476.1	Zhai et al.	10.1016/j.ympev.2019.02.024	terrestrial	chloroplast	no
Amaranthus albus	NCBI	NC_065857.1	Xu et al.	10.1038/s41598-022-11983-2	terrestrial	chloroplast	no
Chenopodium quinoa	NCBI	NC_034949.1	Hong et al.	10.3389/fpls.2017.01696	terrestrial	chloroplast	no
Persicaria capitata	NCBI	NC_073007.1	Wen & Su	N/A	terrestrial	chloroplast	no
Crassula perforata	NCBI	NC_053949.1	Chang et al.	10.3389/fpls.2021.631884	terrestrial	chloroplast	no
Liquidambar formosana	NCBI	NC_023092.1	Dong et al.	10.1093/gbe/evt063	terrestrial	chloroplast	no
Mytilaria laosensis	NCBI	NC_048997.1	Wang et al.	10.1080/23802359.2019.1688118	terrestrial	chloroplast	no
Populus trichocarpa	NCBI	NC_009143.1	Tuskan et al.	10.1126/science.1128691	terrestrial	chloroplast	no
Ricinus communis	NCBI	NC_016736.1	Rivarola et al.	10.1371/journal.pone.0021743	terrestrial	chloroplast	no
Acalypha australis	NCBI	NC_073100.1	Li et al.	10.1080/23802359.2023.2294891	terrestrial	chloroplast	no
Punica granatum	NCBI	NC_035240.1	Rabah et al.	10.3835/plantgenome2017.03.0020	terrestrial	chloroplast	no
Lythrum salicaria	NCBI	NC_042891.1	Gu et al.	10.1186/s12870-019-1870-3	terrestrial	chloroplast	no
Gravesia laxiflora	NCBI	NC_068174.1	Zhou et al.	10.1016/j.ympev.2022.107581	terrestrial	chloroplast	no
Cardamine abchasica	NCBI	NC_060863.1	Ru et al.	10.1016/j.ppees.2020.125557	terrestrial	chloroplast	no
Barbarea verna	NCBI	NC_009269.1	Hosouchi et al.	N/A	terrestrial	chloroplast	no
Arabidopsis thaliana	NCBI	NC_000932.1	Sato et al.	10.1093/dnares/6.5.283	terrestrial	chloroplast	no
Nasa triphylla	NCBI	NC_044802.1	Fu et al.	10.1016/j.ympev.2019.106601	terrestrial	chloroplast	no
Caiophora lateritia	NCBI	NC_044798.1	Fu et al.	10.1016/j.ympev.2019.106601	terrestrial	chloroplast	no
Deutzia glabrata	NCBI	NC_057286.1	Yang & Xin	10.1080/23802359.2020.1715862	terrestrial	chloroplast	no
Plantago ovata	NCBI	NC_041421.1	Li et al.	10.1080/23802359.2018.1544049	terrestrial	chloroplast	no
Pinguicula ehlersiae	NCBI	NC_023463.1	Wicke et al.	10.1093/molbev/mst261	terrestrial	chloroplast	no
Lavandula angustifolia	NCBI	NC_029370.1	Chen & Wang	N/A	terrestrial	chloroplast	no
Hedera nepalensis	NCBI	NC_069225.1	Li	N/A	terrestrial	chloroplast	no
Daucus carota	NCBI	NC_008325.1	Ruhlman et al.	10.1186/1471-2164-7-222	terrestrial	chloroplast	no
Coriandrum sativum	NCBI	NC_029850.1	Peery et al.	N/A	terrestrial	chloroplast	no

## Sheet: Table S7
Table S7. Versions and references of bioinformatics tools used in this paper.
name	version	type	authors	doi
MultiQC	1.16	Software	Ewels et al.	10.1093/bioinformatics/btw354
Cutadapt	5.0	Software	Martin	10.14806/ej.17.1.200
HISAT2	2.2.1	Software	Kim et al.	10.1038/s41587-019-0201-4
BCFtools	1.20.58	Software	Danecek et al.	10.1093/gigascience/giab008
progressiveMauve	2.4.0	Software	Darling et al.	10.1371/journal.pone.0011147
SnpEff	5.2c	Software	Cingolani et al.	10.4161/fly.19695
Red	05.22.2015	Software	Girgis	10.1186/s12859-015-0654-5
BRAKER3	3.0.3	Software	Gabriel et al.	10.1101/2023.06.10.544449
OrthoFinder	2.5.5	Software	Kelly & Emms	10.1186/s13059-019-1832-y
mixOmics	6.26.0	R package	Rohart et al.	10.1371/journal.pcbi.1005752
STRINGdb	2.14.3	R package	Szklarczyk et al.	10.1093/nar/gkac1000
REVIGO	Accessed in April and May 2025	Web application	Supek et al.	10.1371/journal.pone.0021800
InterProScan	2.5.5	Software	Jones et al.	10.1093/bioinformatics/btu031
topGO	2.54.0	R package	Alexa et al.	10.1093/bioinformatics/btl140
ETE 3	3.1.3	Python package	Huerta-Cepas et al.	10.1093/molbev/msw046
MAFFT	7.525	Software	Katoh et al.	10.1093/nar/gkf436
trimAl	1.5	Software	Capella-Gutiérrez et al.	10.1093/bioinformatics/btp348
PAL2NAL	14.1	Software	Suyama et al.	10.1093/nar/gkl315
CodeML	4.10.8	Software	Yang	10.1093/bioinformatics/13.5.555
