# Supplementary material
Source: Research Square preprint supplement (doi:10.21203/rs.3.rs-8335860/v1)
Supplement: Supplementary file 2 [file 543d248fe6a0501ed6b212dd.docx]

**Generation of genetic variability data**

Genetic variability data were not available for *N. peltata*, *P. oceanica*, *R. bungei* and *P. crassipes.* To generate these data, quality control was performed on the sequencing data using MultiQC, and adapter sequences as well as bases with sequencing quality lower than 30 were removed using Cutadapt (for version and references of all the bioinformatics tools used, see Table S7). The mapping was carried out using HiSat2 with the ‑‑very‑sensitive option. Finally, variant calling was done using the BCFtools suite, keeping only variations with a quality greater than 30, a missing data frequency lower than 50%, and a minimum depth of 5. In the end, genetic variability data were based on 1135 individuals (*A. thaliana*), 53 individuals (*B. distachyon*), 26 individuals (*L. minor*), 133 individuals (*M. polymorpha*), 286 individuals (*M. truncatula*), 69 individuals (*N. nucifera*), 164 individuals (*N. peltata*), 154 individuals (*P. crassipes*), 89 individuals (*P. oceanica*), 95 individuals (*R. bungei*), 173 individuals (*S. stoloniferum*) and 24 individuals (*Z. marina*).

To calculate Zeng's E and Way and Fu's H, the inference of ancestral alleles was performed by multiple whole genome alignment of different *Arabidopsis*, *Brachypodium* and *Medicago* genomes on the reference genomes with progressiveMauve (see Table S5 for all references to the different sequencing data used). An allele was considered fixed within a species if the major allele frequency was greater than 0.95. An allele was then considered ancestral if it was identical in at least 95% of species within a genus. Note that for aquatic plants, few genomes or sequencing data from species within the same genus are available, and therefore these statistics could not be calculated precisely.

**Expansion and contraction**

Expansion and contraction analysis were carried on a set of 19 aquatic angiosperms and 32 terrestrial angiosperms (Table S6). Orthogroups were inferred as for population genetic analyses, with protein sequences also generated when these were not available. All protein sequences were functionally annotated with InterProScan. The number of paralogs was counted for each species within each orthogroup and these data were used as input to an sPLS‑DA, keeping only the 100 more discriminant variables (with parameter keepX = c(100,100)). Enrichment was performed on the genes selected by the sPLS‑DA for each species using the R library topGO. Frequencies of enriched GO terms were then computed.
